# Supplementary material for: A synergistic workspace for human consciousness revealed by Integrated Information Decomposition
Source: eLife. 2024 Jul 18;12:RP88173. doi: 10.7554/eLife.88173 (PMC11257694; doi:10.7554/eLife.88173)
Supplement: Figure 2—source data 1. [file elife-88173-fig2-data1.xlsx]

## Sheet: SynergisticWorkspace_S454
0
0
0
0
0
66
0
-53
97
0
0
29
0
93
79
0
0
147
102
0
0
0
0
152
0
0
0
-68
146
0
-68
0
0
0
0
0
0
0
0
0
0
0
0
0
0
0
0
0
0
0
0
0
0
0
0
0
0
0
0
0
0
0
0
0
0
0
0
0
0
-323
-333
0
0
-302
-189
0
0
0
0
0
-205
-197
-299
-238
-224
0
0
0
-274
0
0
0
-236
0
-238
0
-176
0
0
0
0
0
0
0
-244
-279
0
0
0
0
0
0
0
-207
-283
-309
-167
-111
0
-439
-363
-255
-308
-144
-372
0
-199
-246
-137
-146
-153
-184
-179
-186
-71
-232
-236
-136
-241
-227
-268
-210
0
-271
-222
0
-162
-49
352
372
222
0
0
252
0
0
0
0
0
242
76
361
335
306
241
331
90
220
318
308
186
220
353
365
156
287
132
331
313
258
321
223
367
318
121
225
294
338
140
306
207
410
173
139
396
435
363
0
291
318
0
0
0
36
0
0
0
60
-110
56
0
0
34
0
72
0
0
106
0
0
58
0
144
0
0
0
0
0
94
0
0
0
0
0
0
0
0
0
0
0
0
0
0
0
0
0
0
0
0
0
0
0
0
0
0
0
0
0
0
0
0
0
0
0
0
0
20
0
0
0
-321
-356
0
-251
0
0
-189
0
0
-256
-228
-203
0
0
-322
0
-303
-223
0
0
0
0
0
0
0
0
0
0
-252
-259
0
0
0
0
0
0
0
0
-264
-317
0
0
0
0
0
0
0
-191
-377
-424
-239
-450
-231
-142
0
-236
-186
0
-268
0
0
-87
-216
-189
-271
-135
-133
-55
-161
-167
-164
-120
-140
-323
-209
-286
0
-186
-151
-284
-174
-81
-275
-84
-231
-210
-2
-167
0
-144
-118
0
0
0
95
240
173
304
107
0
264
0
105
0
0
66
163
35
316
261
264
350
227
0
316
304
318
178
363
294
236
184
125
134
406
382
371
165
412
147

## Sheet: Synergy_HCP_S454
2.36182	2.45219	2.4621	2.47079	2.49014	2.49519	2.43581	2.48548	2.49989	2.49439	2.49164	2.51619	2.4559	2.50396	2.51027	2.48855	2.49397	2.51713	2.50716	2.46569	2.50715	2.48731	2.49448	2.52179	2.51401	2.50477	2.4898	2.50187	2.51175	2.51471	2.50031	2.4928	2.49304	2.42619	2.45579	2.44598	2.49775	2.45696	2.49789	2.50919	2.47763	2.51958	2.49732	2.5123	2.49925	2.51233	2.50419	2.49839	2.48309	2.50315
2.45219	2.36182	2.50421	2.48624	2.5015	2.52521	2.43549	2.52447	2.5179	2.50476	2.50592	2.53275	2.46085	2.52234	2.51879	2.49802	2.51814	2.50791	2.52271	2.45756	2.50818	2.49769	2.50647	2.52304	2.52213	2.51496	2.51308	2.50808	2.5229	2.53167	2.51741	2.50201	2.50094	2.4299	2.46893	2.46104	2.50977	2.46824	2.50479	2.51543	2.49121	2.5302	2.51955	2.53106	2.52016	2.52742	2.52357	2.52329	2.5024	2.52859
2.4621	2.50421	2.36182	2.53168	2.53096	2.53208	2.46515	2.53195	2.54176	2.53274	2.53322	2.59285	2.47047	2.5612	2.57257	2.5377	2.55637	2.56378	2.57146	2.50994	2.56843	2.53236	2.53928	2.58158	2.60097	2.56975	2.54656	2.56254	2.57823	2.58167	2.56304	2.52936	2.52525	2.44171	2.47494	2.46645	2.55045	2.4784	2.52962	2.54482	2.51886	2.5652	2.54452	2.57313	2.55302	2.57539	2.56092	2.54733	2.50808	2.54728
2.47079	2.48624	2.53168	2.36182	2.49735	2.55937	2.44791	2.54032	2.5373	2.4782	2.49684	2.5648	2.44999	2.56319	2.55297	2.51222	2.53957	2.5512	2.5651	2.47698	2.54718	2.50554	2.52837	2.56132	2.55036	2.5166	2.52199	2.53605	2.5486	2.54894	2.5403	2.52027	2.51323	2.43489	2.47125	2.46256	2.52598	2.47271	2.51535	2.53625	2.49897	2.54147	2.52898	2.54199	2.52697	2.54596	2.53715	2.5305	2.50323	2.5452
2.49014	2.5015	2.53096	2.49735	2.36182	2.57479	2.47255	2.55982	2.5543	2.52021	2.51911	2.61161	2.47286	2.59287	2.59833	2.54336	2.56596	2.59424	2.59487	2.51039	2.59596	2.5491	2.57001	2.59282	2.58873	2.56978	2.52816	2.55796	2.58021	2.57471	2.56836	2.52969	2.53485	2.44075	2.47216	2.46514	2.54531	2.48605	2.52355	2.55118	2.51124	2.56017	2.55249	2.5634	2.5505	2.56768	2.55449	2.55031	2.50537	2.56199
2.49519	2.52521	2.53208	2.55937	2.57479	2.36182	2.48215	2.56644	2.56394	2.55737	2.57854	2.61964	2.48368	2.5673	2.59751	2.54266	2.57912	2.57073	2.58193	2.51827	2.57054	2.54581	2.57689	2.61497	2.62185	2.58227	2.57991	2.60738	2.62707	2.61476	2.60804	2.54445	2.54978	2.44086	2.49294	2.47489	2.5653	2.49394	2.54364	2.58076	2.52948	2.58419	2.58817	2.61037	2.58874	2.5913	2.59213	2.57575	2.52211	2.58825
2.43581	2.43549	2.46515	2.44791	2.47255	2.48215	2.36182	2.47768	2.4781	2.47045	2.47528	2.48817	2.42137	2.48297	2.47347	2.45789	2.47096	2.47676	2.48052	2.43051	2.47214	2.45671	2.46954	2.48166	2.4768	2.46561	2.47236	2.47247	2.48075	2.47763	2.47246	2.46231	2.46478	2.40986	2.44297	2.43558	2.46463	2.43974	2.46255	2.48487	2.46774	2.47897	2.47262	2.48309	2.47269	2.47661	2.4796	2.4727	2.46117	2.48535
2.48548	2.52447	2.53195	2.54032	2.55982	2.56644	2.47768	2.36182	2.5791	2.55497	2.5696	2.63214	2.48884	2.59352	2.60793	2.5459	2.57265	2.58738	2.5987	2.52246	2.57537	2.54597	2.57356	2.6282	2.62598	2.58883	2.57688	2.61373	2.64021	2.61429	2.60964	2.53275	2.52645	2.44063	2.48462	2.46286	2.5584	2.48432	2.53691	2.56865	2.5166	2.57519	2.5748	2.60085	2.57601	2.58269	2.58005	2.56611	2.52086	2.56084
2.49989	2.5179	2.54176	2.5373	2.5543	2.56394	2.4781	2.5791	2.36182	2.55126	2.55581	2.60787	2.47787	2.58915	2.57638	2.54759	2.5786	2.5605	2.58329	2.51384	2.56912	2.53651	2.57643	2.5852	2.60765	2.57465	2.57173	2.59159	2.60888	2.59458	2.60452	2.53052	2.53336	2.44002	2.48102	2.46826	2.55384	2.48442	2.53671	2.56269	2.51591	2.57105	2.5706	2.5854	2.57701	2.57803	2.58078	2.56929	2.50933	2.57876
2.49439	2.50476	2.53274	2.4782	2.52021	2.55737	2.47045	2.55497	2.55126	2.36182	2.49954	2.57263	2.44462	2.5659	2.56755	2.48573	2.55706	2.55268	2.56647	2.49043	2.54935	2.49506	2.54141	2.57019	2.54525	2.51468	2.54216	2.55598	2.54973	2.53301	2.56197	2.51884	2.51897	2.43578	2.46429	2.45676	2.52923	2.47845	2.51323	2.54322	2.49934	2.55136	2.54071	2.54755	2.53393	2.5441	2.54205	2.53994	2.49236	2.55424
2.49164	2.50592	2.53322	2.49684	2.51911	2.57854	2.47528	2.5696	2.55581	2.49954	2.36182	2.59242	2.45373	2.58137	2.58014	2.50017	2.57168	2.53435	2.58472	2.50026	2.53918	2.50748	2.56041	2.55601	2.54147	2.52851	2.54204	2.56868	2.54726	2.54359	2.56736	2.52179	2.52718	2.43887	2.46814	2.4545	2.53421	2.47728	2.52222	2.54615	2.50891	2.55144	2.55345	2.55953	2.55199	2.56069	2.55	2.54798	2.50441	2.56331
2.51619	2.53275	2.59285	2.5648	2.61161	2.61964	2.48817	2.63214	2.60787	2.57263	2.59242	2.36182	2.49985	2.63189	2.61651	2.57638	2.61621	2.60252	2.61029	2.52714	2.58997	2.56444	2.61626	2.63931	2.6381	2.59774	2.62134	2.63222	2.64604	2.62778	2.63616	2.54002	2.54968	2.43938	2.48844	2.48406	2.5644	2.49092	2.54256	2.57405	2.52403	2.58768	2.57687	2.60585	2.5844	2.59117	2.58906	2.58125	2.52493	2.58211
2.4559	2.46085	2.47047	2.44999	2.47286	2.48368	2.42137	2.48884	2.47787	2.44462	2.45373	2.49985	2.36182	2.48718	2.48343	2.43683	2.48728	2.47936	2.48604	2.43139	2.45679	2.44351	2.47231	2.48548	2.46382	2.4456	2.47215	2.47617	2.46854	2.46419	2.47457	2.48088	2.48111	2.42459	2.4467	2.4328	2.48207	2.44869	2.47198	2.49013	2.46606	2.49559	2.47822	2.49424	2.48238	2.48564	2.48562	2.48525	2.46361	2.48938
2.50396	2.52234	2.5612	2.56319	2.59287	2.5673	2.48297	2.59352	2.58915	2.5659	2.58137	2.63189	2.48718	2.36182	2.61448	2.56022	2.59479	2.58308	2.5973	2.52003	2.5745	2.54762	2.60551	2.62818	2.63738	2.58622	2.61107	2.61491	2.64287	2.62349	2.63414	2.53262	2.54039	2.42626	2.47874	2.45755	2.56251	2.48473	2.528	2.56428	2.50963	2.57013	2.56292	2.59188	2.56643	2.58038	2.56814	2.56195	2.50797	2.56904
2.51027	2.51879	2.57257	2.55297	2.59833	2.59751	2.47347	2.60793	2.57638	2.56755	2.58014	2.61651	2.48343	2.61448	2.36182	2.55163	2.59898	2.58058	2.60736	2.51252	2.56984	2.54706	2.59698	2.6194	2.62697	2.58252	2.60929	2.60657	2.62633	2.59762	2.61762	2.52994	2.5426	2.43188	2.48281	2.47756	2.55465	2.48148	2.5367	2.5638	2.5163	2.57787	2.57087	2.59343	2.5791	2.57341	2.57844	2.5835	2.52136	2.57774
2.48855	2.49802	2.5377	2.51222	2.54336	2.54266	2.45789	2.5459	2.54759	2.48573	2.50017	2.57638	2.43683	2.56022	2.55163	2.36182	2.56229	2.52856	2.55236	2.4579	2.5061	2.4628	2.54165	2.54655	2.53659	2.52236	2.5508	2.54179	2.54911	2.55178	2.54264	2.53843	2.54521	2.44767	2.48227	2.47582	2.54607	2.49261	2.53273	2.55218	2.51729	2.55829	2.54117	2.54862	2.53403	2.56489	2.55676	2.55419	2.51468	2.56378
2.49397	2.51814	2.55637	2.53957	2.56596	2.57912	2.47096	2.57265	2.5786	2.55706	2.57168	2.61621	2.48728	2.59479	2.59898	2.56229	2.36182	2.59666	2.60466	2.52004	2.59313	2.55595	2.59909	2.62508	2.62999	2.59097	2.60212	2.60433	2.63182	2.61404	2.62581	2.53241	2.53009	2.44338	2.47063	2.45677	2.55393	2.48769	2.52402	2.55676	2.5019	2.55969	2.5628	2.58052	2.57037	2.56582	2.56314	2.55762	2.51381	2.5515
2.51713	2.50791	2.56378	2.5512	2.59424	2.57073	2.47676	2.58738	2.5605	2.55268	2.53435	2.60252	2.47936	2.58308	2.58058	2.52856	2.59666	2.36182	2.59657	2.49824	2.53769	2.52687	2.58395	2.59334	2.59713	2.58047	2.59846	2.58055	2.5969	2.57811	2.58297	2.54597	2.56113	2.45707	2.48707	2.4811	2.56122	2.4988	2.54292	2.56119	2.53003	2.5707	2.55743	2.56576	2.55315	2.5822	2.56895	2.56827	2.52665	2.57495
2.50716	2.52271	2.57146	2.5651	2.59487	2.58193	2.48052	2.5987	2.58329	2.56647	2.58472	2.61029	2.48604	2.5973	2.60736	2.55236	2.60466	2.59657	2.36182	2.51746	2.57928	2.54545	2.60123	2.64768	2.634	2.58652	2.60327	2.61151	2.62676	2.60811	2.63312	2.53699	2.54235	2.4293	2.48025	2.46978	2.55985	2.4809	2.53472	2.56186	2.51612	2.57406	2.56526	2.59893	2.57297	2.58105	2.57084	2.56664	2.5144	2.56363
2.46569	2.45756	2.50994	2.47698	2.51039	2.51827	2.43051	2.52246	2.51384	2.49043	2.50026	2.52714	2.43139	2.52003	2.51252	2.4579	2.52004	2.49824	2.51746	2.36182	2.5006	2.47064	2.51606	2.51672	2.51486	2.48626	2.51683	2.5191	2.52599	2.51598	2.51689	2.49872	2.50289	2.42924	2.46271	2.44545	2.5059	2.46055	2.49497	2.50759	2.48871	2.51705	2.50023	2.51686	2.50156	2.51014	2.51339	2.51011	2.48088	2.51665
2.50715	2.50818	2.56843	2.54718	2.59596	2.57054	2.47214	2.57537	2.56912	2.54935	2.53918	2.58997	2.45679	2.5745	2.56984	2.5061	2.59313	2.53769	2.57928	2.5006	2.36182	2.52077	2.57673	2.57314	2.59284	2.57692	2.59753	2.57628	2.60056	2.58917	2.58208	2.54134	2.56304	2.45408	2.49009	2.48477	2.55671	2.50117	2.54336	2.56049	2.5211	2.56647	2.56104	2.56853	2.55371	2.58784	2.57305	2.57461	2.52574	2.5896
2.48731	2.49769	2.53236	2.50554	2.5491	2.54581	2.45671	2.54597	2.53651	2.49506	2.50748	2.56444	2.44351	2.54762	2.54706	2.4628	2.55595	2.52687	2.54545	2.47064	2.52077	2.36182	2.53717	2.54317	2.54245	2.51847	2.54875	2.5434	2.54594	2.53945	2.5494	2.53326	2.54096	2.452	2.48388	2.48225	2.54063	2.48638	2.53173	2.5484	2.5115	2.54957	2.54889	2.55586	2.5364	2.55572	2.55687	2.55335	2.5082	2.56318
2.49448	2.50647	2.53928	2.52837	2.57001	2.57689	2.46954	2.57356	2.57643	2.54141	2.56041	2.61626	2.47231	2.60551	2.59698	2.54165	2.59909	2.58395	2.60123	2.51606	2.57673	2.53717	2.36182	2.61897	2.61801	2.57819	2.57198	2.59674	2.61866	2.60114	2.60484	2.53643	2.53751	2.43812	2.48721	2.46468	2.55934	2.48853	2.52799	2.56644	2.51332	2.56961	2.57059	2.59741	2.57272	2.58464	2.57369	2.56761	2.51708	2.57243
2.52179	2.52304	2.58158	2.56132	2.59282	2.61497	2.48166	2.6282	2.5852	2.57019	2.55601	2.63931	2.48548	2.62818	2.6194	2.54655	2.62508	2.59334	2.64768	2.51672	2.57314	2.54317	2.61897	2.36182	2.58441	2.58563	2.61217	2.61319	2.60124	2.57969	2.63215	2.54498	2.55127	2.43366	2.48698	2.46748	2.57046	2.49202	2.54187	2.56638	2.52716	2.5852	2.58292	2.60217	2.58001	2.5977	2.58521	2.57766	2.52931	2.5928
2.51401	2.52213	2.60097	2.55036	2.58873	2.62185	2.4768	2.62598	2.60765	2.54525	2.54147	2.6381	2.46382	2.63738	2.62697	2.53659	2.62999	2.59713	2.634	2.51486	2.59284	2.54245	2.61801	2.58441	2.36182	2.58096	2.61638	2.61555	2.60128	2.57068	2.63905	2.54876	2.55387	2.44645	2.48911	2.47958	2.57182	2.49655	2.54332	2.57126	2.5311	2.58753	2.59087	2.60913	2.58279	2.60929	2.58874	2.58606	2.52125	2.58926
2.50477	2.51496	2.56975	2.5166	2.56978	2.58227	2.46561	2.58883	2.57465	2.51468	2.52851	2.59774	2.4456	2.58622	2.58252	2.52236	2.59097	2.58047	2.58652	2.48626	2.57692	2.51847	2.57819	2.58563	2.58096	2.36182	2.588	2.59198	2.59304	2.57242	2.59376	2.53775	2.5408	2.44492	2.47702	2.47415	2.54421	2.49116	2.52828	2.55598	2.51622	2.56922	2.55214	2.56535	2.54242	2.57686	2.5677	2.55796	2.516	2.5653
2.4898	2.51308	2.54656	2.52199	2.52816	2.57991	2.47236	2.57688	2.57173	2.54216	2.54204	2.62134	2.47215	2.61107	2.60929	2.5508	2.60212	2.59846	2.60327	2.51683	2.59753	2.54875	2.57198	2.61217	2.61638	2.588	2.36182	2.57548	2.60136	2.5875	2.58257	2.52523	2.52816	2.43232	2.48051	2.45765	2.55	2.48104	2.52341	2.55572	2.50685	2.55969	2.56067	2.59228	2.56551	2.58114	2.56767	2.56205	2.50966	2.56212
2.50187	2.50808	2.56254	2.53605	2.55796	2.60738	2.47247	2.61373	2.59159	2.55598	2.56868	2.63222	2.47617	2.61491	2.60657	2.54179	2.60433	2.58055	2.61151	2.5191	2.57628	2.5434	2.59674	2.61319	2.61555	2.59198	2.57548	2.36182	2.62112	2.60523	2.60187	2.53857	2.53729	2.43887	2.49425	2.47416	2.55644	2.48611	2.53708	2.5737	2.52506	2.58226	2.57873	2.61185	2.58597	2.60108	2.58034	2.57656	2.53067	2.57308
2.51175	2.5229	2.57823	2.5486	2.58021	2.62707	2.48075	2.64021	2.60888	2.54973	2.54726	2.64604	2.46854	2.64287	2.62633	2.54911	2.63182	2.5969	2.62676	2.52599	2.60056	2.54594	2.61866	2.60124	2.60128	2.59304	2.60136	2.62112	2.36182	2.57935	2.64438	2.54503	2.54234	2.43966	2.48498	2.4657	2.56776	2.49075	2.53626	2.57244	2.52318	2.58758	2.59695	2.62061	2.59545	2.60411	2.59392	2.58839	2.51971	2.58783
2.51471	2.53167	2.58167	2.54894	2.57471	2.61476	2.47763	2.61429	2.59458	2.53301	2.54359	2.62778	2.46419	2.62349	2.59762	2.55178	2.61404	2.57811	2.60811	2.51598	2.58917	2.53945	2.60114	2.57969	2.57068	2.57242	2.5875	2.60523	2.57935	2.36182	2.61742	2.54944	2.54709	2.45308	2.49298	2.48065	2.56437	2.49891	2.54165	2.57036	2.52452	2.58865	2.58841	2.60622	2.5832	2.6085	2.59071	2.58941	2.52679	2.60058
2.50031	2.51741	2.56304	2.5403	2.56836	2.60804	2.47246	2.60964	2.60452	2.56197	2.56736	2.63616	2.47457	2.63414	2.61762	2.54264	2.62581	2.58297	2.63312	2.51689	2.58208	2.5494	2.60484	2.63215	2.63905	2.59376	2.58257	2.60187	2.64438	2.61742	2.36182	2.55027	2.54735	2.44127	2.49496	2.47598	2.56413	2.49379	2.5378	2.57237	2.52567	2.58482	2.57594	2.60131	2.58637	2.58764	2.58349	2.58354	2.53307	2.58469
2.4928	2.50201	2.52936	2.52027	2.52969	2.54445	2.46231	2.53275	2.53052	2.51884	2.52179	2.54002	2.48088	2.53262	2.52994	2.53843	2.53241	2.54597	2.53699	2.49872	2.54134	2.53326	2.53643	2.54498	2.54876	2.53775	2.52523	2.53857	2.54503	2.54944	2.55027	2.36182	2.4879	2.4253	2.46994	2.46611	2.51648	2.46319	2.50302	2.51134	2.5054	2.54291	2.52286	2.52677	2.52302	2.52352	2.51254	2.51845	2.48933	2.51259
2.49304	2.50094	2.52525	2.51323	2.53485	2.54978	2.46478	2.52645	2.53336	2.51897	2.52718	2.54968	2.48111	2.54039	2.5426	2.54521	2.53009	2.56113	2.54235	2.50289	2.56304	2.54096	2.53751	2.55127	2.55387	2.5408	2.52816	2.53729	2.54234	2.54709	2.54735	2.4879	2.36182	2.43412	2.46287	2.46026	2.52718	2.4547	2.50028	2.52709	2.50545	2.54739	2.52124	2.53152	2.52298	2.52526	2.52492	2.51729	2.48832	2.52693
2.42619	2.4299	2.44171	2.43489	2.44075	2.44086	2.40986	2.44063	2.44002	2.43578	2.43887	2.43938	2.42459	2.42626	2.43188	2.44767	2.44338	2.45707	2.4293	2.42924	2.45408	2.452	2.43812	2.43366	2.44645	2.44492	2.43232	2.43887	2.43966	2.45308	2.44127	2.4253	2.43412	2.36182	2.41837	2.38825	2.43573	2.41319	2.43134	2.43964	2.42354	2.43648	2.43549	2.4338	2.4304	2.43314	2.43995	2.42998	2.41311	2.43051
2.45579	2.46893	2.47494	2.47125	2.47216	2.49294	2.44297	2.48462	2.48102	2.46429	2.46814	2.48844	2.4467	2.47874	2.48281	2.48227	2.47063	2.48707	2.48025	2.46271	2.49009	2.48388	2.48721	2.48698	2.48911	2.47702	2.48051	2.49425	2.48498	2.49298	2.49496	2.46994	2.46287	2.41837	2.36182	2.43843	2.47282	2.43924	2.43494	2.46322	2.45399	2.46989	2.46409	2.47402	2.46951	2.45181	2.4794	2.45957	2.44697	2.46779
2.44598	2.46104	2.46645	2.46256	2.46514	2.47489	2.43558	2.46286	2.46826	2.45676	2.4545	2.48406	2.4328	2.45755	2.47756	2.47582	2.45677	2.4811	2.46978	2.44545	2.48477	2.48225	2.46468	2.46748	2.47958	2.47415	2.45765	2.47416	2.4657	2.48065	2.47598	2.46611	2.46026	2.38825	2.43843	2.36182	2.46547	2.43023	2.45339	2.47335	2.45806	2.4869	2.46416	2.46187	2.45669	2.46825	2.47027	2.45763	2.42964	2.45638
2.49775	2.50977	2.55045	2.52598	2.54531	2.5653	2.46463	2.5584	2.55384	2.52923	2.53421	2.5644	2.48207	2.56251	2.55465	2.54607	2.55393	2.56122	2.55985	2.5059	2.55671	2.54063	2.55934	2.57046	2.57182	2.54421	2.55	2.55644	2.56776	2.56437	2.56413	2.51648	2.52718	2.43573	2.47282	2.46547	2.36182	2.47955	2.51742	2.53905	2.50685	2.55467	2.53406	2.5459	2.53833	2.54037	2.54119	2.53273	2.49409	2.53196
2.45696	2.46824	2.4784	2.47271	2.48605	2.49394	2.43974	2.48432	2.48442	2.47845	2.47728	2.49092	2.44869	2.48473	2.48148	2.49261	2.48769	2.4988	2.4809	2.46055	2.50117	2.48638	2.48853	2.49202	2.49655	2.49116	2.48104	2.48611	2.49075	2.49891	2.49379	2.46319	2.4547	2.41319	2.43924	2.43023	2.47955	2.36182	2.46552	2.48843	2.46256	2.48666	2.47189	2.47597	2.47053	2.47591	2.47651	2.4654	2.44216	2.48057
2.49789	2.50479	2.52962	2.51535	2.52355	2.54364	2.46255	2.53691	2.53671	2.51323	2.52222	2.54256	2.47198	2.528	2.5367	2.53273	2.52402	2.54292	2.53472	2.49497	2.54336	2.53173	2.52799	2.54187	2.54332	2.52828	2.52341	2.53708	2.53626	2.54165	2.5378	2.50302	2.50028	2.43134	2.43494	2.45339	2.51742	2.46552	2.36182	2.48733	2.47426	2.50903	2.50823	2.51958	2.49989	2.50597	2.52262	2.48796	2.4812	2.50691
2.50919	2.51543	2.54482	2.53625	2.55118	2.58076	2.48487	2.56865	2.56269	2.54322	2.54615	2.57405	2.49013	2.56428	2.5638	2.55218	2.55676	2.56119	2.56186	2.50759	2.56049	2.5484	2.56644	2.56638	2.57126	2.55598	2.55572	2.5737	2.57244	2.57036	2.57237	2.51134	2.52709	2.43964	2.46322	2.47335	2.53905	2.48843	2.48733	2.36182	2.50218	2.52369	2.54561	2.5624	2.54176	2.54729	2.54219	2.53528	2.5073	2.51893
2.47763	2.49121	2.51886	2.49897	2.51124	2.52948	2.46774	2.5166	2.51591	2.49934	2.50891	2.52403	2.46606	2.50963	2.5163	2.51729	2.5019	2.53003	2.51612	2.48871	2.5211	2.5115	2.51332	2.52716	2.5311	2.51622	2.50685	2.52506	2.52318	2.52452	2.52567	2.5054	2.50545	2.42354	2.45399	2.45806	2.50685	2.46256	2.47426	2.50218	2.36182	2.5158	2.515	2.51083	2.49938	2.48731	2.50935	2.48712	2.46021	2.49355
2.51958	2.5302	2.5652	2.54147	2.56017	2.58419	2.47897	2.57519	2.57105	2.55136	2.55144	2.58768	2.49559	2.57013	2.57787	2.55829	2.55969	2.5707	2.57406	2.51705	2.56647	2.54957	2.56961	2.5852	2.58753	2.56922	2.55969	2.58226	2.58758	2.58865	2.58482	2.54291	2.54739	2.43648	2.46989	2.4869	2.55467	2.48666	2.50903	2.52369	2.5158	2.36182	2.55895	2.55881	2.55668	2.54618	2.55346	2.55261	2.51153	2.54312
2.49732	2.51955	2.54452	2.52898	2.55249	2.58817	2.47262	2.5748	2.5706	2.54071	2.55345	2.57687	2.47822	2.56292	2.57087	2.54117	2.5628	2.55743	2.56526	2.50023	2.56104	2.54889	2.57059	2.58292	2.59087	2.55214	2.56067	2.57873	2.59695	2.58841	2.57594	2.52286	2.52124	2.43549	2.46409	2.46416	2.53406	2.47189	2.50823	2.54561	2.515	2.55895	2.36182	2.52807	2.50055	2.54933	2.53992	2.52245	2.50374	2.53759
2.5123	2.53106	2.57313	2.54199	2.5634	2.61037	2.48309	2.60085	2.5854	2.54755	2.55953	2.60585	2.49424	2.59188	2.59343	2.54862	2.58052	2.56576	2.59893	2.51686	2.56853	2.55586	2.59741	2.60217	2.60913	2.56535	2.59228	2.61185	2.62061	2.60622	2.60131	2.52677	2.53152	2.4338	2.47402	2.46187	2.5459	2.47597	2.51958	2.5624	2.51083	2.55881	2.52807	2.36182	2.53223	2.56943	2.56287	2.53463	2.50452	2.5618
2.49925	2.52016	2.55302	2.52697	2.5505	2.58874	2.47269	2.57601	2.57701	2.53393	2.55199	2.5844	2.48238	2.56643	2.5791	2.53403	2.57037	2.55315	2.57297	2.50156	2.55371	2.5364	2.57272	2.58001	2.58279	2.54242	2.56551	2.58597	2.59545	2.5832	2.58637	2.52302	2.52298	2.4304	2.46951	2.45669	2.53833	2.47053	2.49989	2.54176	2.49938	2.55668	2.50055	2.53223	2.36182	2.55089	2.54549	2.53004	2.50028	2.53677
2.51233	2.52742	2.57539	2.54596	2.56768	2.5913	2.47661	2.58269	2.57803	2.5441	2.56069	2.59117	2.48564	2.58038	2.57341	2.56489	2.56582	2.5822	2.58105	2.51014	2.58784	2.55572	2.58464	2.5977	2.60929	2.57686	2.58114	2.60108	2.60411	2.6085	2.58764	2.52352	2.52526	2.43314	2.45181	2.46825	2.54037	2.47591	2.50597	2.54729	2.48731	2.54618	2.54933	2.56943	2.55089	2.36182	2.5644	2.56021	2.49926	2.5521
2.50419	2.52357	2.56092	2.53715	2.55449	2.59213	2.4796	2.58005	2.58078	2.54205	2.55	2.58906	2.48562	2.56814	2.57844	2.55676	2.56314	2.56895	2.57084	2.51339	2.57305	2.55687	2.57369	2.58521	2.58874	2.5677	2.56767	2.58034	2.59392	2.59071	2.58349	2.51254	2.52492	2.43995	2.4794	2.47027	2.54119	2.47651	2.52262	2.54219	2.50935	2.55346	2.53992	2.56287	2.54549	2.5644	2.36182	2.55381	2.49885	2.54709
2.49839	2.52329	2.54733	2.5305	2.55031	2.57575	2.4727	2.56611	2.56929	2.53994	2.54798	2.58125	2.48525	2.56195	2.5835	2.55419	2.55762	2.56827	2.56664	2.51011	2.57461	2.55335	2.56761	2.57766	2.58606	2.55796	2.56205	2.57656	2.58839	2.58941	2.58354	2.51845	2.51729	2.42998	2.45957	2.45763	2.53273	2.4654	2.48796	2.53528	2.48712	2.55261	2.52245	2.53463	2.53004	2.56021	2.55381	2.36182	2.49499	2.54496
2.48309	2.5024	2.50808	2.50323	2.50537	2.52211	2.46117	2.52086	2.50933	2.49236	2.50441	2.52493	2.46361	2.50797	2.52136	2.51468	2.51381	2.52665	2.5144	2.48088	2.52574	2.5082	2.51708	2.52931	2.52125	2.516	2.50966	2.53067	2.51971	2.52679	2.53307	2.48933	2.48832	2.41311	2.44697	2.42964	2.49409	2.44216	2.4812	2.5073	2.46021	2.51153	2.50374	2.50452	2.50028	2.49926	2.49885	2.49499	2.36182	2.49676
2.50315	2.52859	2.54728	2.5452	2.56199	2.58825	2.48535	2.56084	2.57876	2.55424	2.56331	2.58211	2.48938	2.56904	2.57774	2.56378	2.5515	2.57495	2.56363	2.51665	2.5896	2.56318	2.57243	2.5928	2.58926	2.5653	2.56212	2.57308	2.58783	2.60058	2.58469	2.51259	2.52693	2.43051	2.46779	2.45638	2.53196	2.48057	2.50691	2.51893	2.49355	2.54312	2.53759	2.5618	2.53677	2.5521	2.54709	2.54496	2.49676	2.36182
2.52533	2.53866	2.60001	2.56643	2.59603	2.62705	2.49287	2.62073	2.62342	2.56634	2.58991	2.628	2.49882	2.62289	2.62348	2.57359	2.59564	2.61459	2.62347	2.51763	2.61289	2.56923	2.61992	2.63136	2.6343	2.58739	2.61359	2.63545	2.64018	2.63244	2.63682	2.52888	2.52955	2.42876	2.46871	2.44949	2.55109	2.47577	2.50839	2.55466	2.48095	2.56436	2.54744	2.5782	2.56496	2.57871	2.56835	2.54156	2.49852	2.55104
2.52449	2.52824	2.59279	2.54607	2.588	2.61513	2.48147	2.61588	2.60519	2.55244	2.57872	2.62352	2.48941	2.6228	2.61293	2.55995	2.60776	2.60353	2.6178	2.50995	2.59797	2.55393	2.61373	2.62726	2.62711	2.58074	2.61195	2.62674	2.6283	2.61637	2.62333	2.52342	2.5265	2.42154	2.45942	2.45057	2.54885	2.47086	2.50701	2.55378	2.47933	2.55833	2.54345	2.57063	2.55447	2.55312	2.57078	2.55502	2.50319	2.56925
2.51239	2.52406	2.55826	2.53785	2.5598	2.5881	2.48212	2.58599	2.58707	2.54412	2.56518	2.58797	2.48623	2.57792	2.58389	2.53863	2.56485	2.58318	2.58513	2.50575	2.57181	2.54464	2.57542	2.5986	2.59379	2.55549	2.57739	2.59636	2.59997	2.58966	2.59684	2.51445	2.51422	2.42408	2.46717	2.4385	2.53041	2.46448	2.50444	2.53864	2.47125	2.54762	2.5254	2.5482	2.52458	2.53616	2.5378	2.52126	2.48594	2.53051
2.47519	2.48417	2.50806	2.48917	2.50692	2.53429	2.46042	2.52714	2.52647	2.49664	2.49307	2.53223	2.46037	2.52283	2.52049	2.49677	2.51709	2.51284	2.52186	2.482	2.50937	2.49179	2.51068	2.52888	2.52988	2.49602	2.5183	2.52107	2.5244	2.52387	2.52358	2.50252	2.50427	2.42244	2.47206	2.45097	2.51026	2.46974	2.50007	2.52013	2.48046	2.52902	2.504	2.51781	2.50124	2.50823	2.51686	2.50265	2.46669	2.51293
2.49218	2.51008	2.5278	2.5049	2.5291	2.56273	2.47549	2.55624	2.54472	2.51237	2.5249	2.55037	2.47462	2.54394	2.54592	2.5131	2.5378	2.54015	2.54728	2.48708	2.53795	2.52223	2.54442	2.56618	2.5531	2.53025	2.54431	2.56575	2.55823	2.55904	2.55621	2.49753	2.50287	2.42311	2.45888	2.44121	2.51924	2.4604	2.49958	2.53137	2.48787	2.54054	2.51336	2.52407	2.51391	2.53146	2.52456	2.51968	2.46961	2.52917
2.48776	2.49948	2.50624	2.49942	2.50835	2.5404	2.46305	2.52469	2.52536	2.50736	2.51214	2.5317	2.46785	2.51524	2.53368	2.51406	2.51255	2.52561	2.52348	2.48204	2.52532	2.50752	2.51971	2.53694	2.53396	2.51239	2.51182	2.53621	2.52967	2.53533	2.53047	2.48877	2.49532	2.42319	2.45737	2.44806	2.4963	2.46683	2.49372	2.50577	2.46654	2.50587	2.50544	2.51802	2.5078	2.50524	2.50701	2.50361	2.4653	2.49292
2.51287	2.52766	2.58207	2.54485	2.57445	2.61268	2.48607	2.60695	2.60105	2.5558	2.57158	2.6092	2.49004	2.59819	2.60436	2.55786	2.5886	2.59726	2.60444	2.51574	2.59333	2.55813	2.60016	2.61954	2.61733	2.57488	2.59956	2.62168	2.61644	2.61459	2.6159	2.5309	2.53127	2.4234	2.46311	2.43768	2.55202	2.47259	2.50585	2.54767	2.46975	2.5574	2.53466	2.55894	2.54418	2.55186	2.56062	2.53791	2.4916	2.54098
2.50814	2.52052	2.57208	2.54067	2.57436	2.60917	2.47928	2.60231	2.5922	2.54541	2.56162	2.61049	2.48098	2.60815	2.59561	2.55223	2.58816	2.58477	2.60193	2.50952	2.57995	2.55042	2.58941	2.61587	2.62219	2.57669	2.58234	2.60184	2.62042	2.61095	2.60434	2.54318	2.53538	2.43732	2.4674	2.46994	2.56127	2.48794	2.53127	2.55316	2.50348	2.56301	2.56562	2.59138	2.57035	2.56427	2.57986	2.56211	2.51748	2.57162
2.51336	2.52363	2.57641	2.53853	2.56992	2.60689	2.48182	2.59787	2.59566	2.54959	2.56037	2.60102	2.48918	2.59102	2.59771	2.54926	2.57805	2.58891	2.59644	2.50754	2.58603	2.55415	2.5911	2.61218	2.61729	2.56337	2.59311	2.60651	2.61133	2.607	2.60818	2.52672	2.52434	2.42996	2.47087	2.44642	2.5513	2.46955	2.51325	2.55763	2.48115	2.56331	2.54679	2.56272	2.54845	2.55709	2.56235	2.54392	2.49013	2.54409
2.50365	2.52016	2.56954	2.53713	2.57153	2.60633	2.47742	2.58569	2.58961	2.53983	2.56154	2.60665	2.48626	2.59561	2.59768	2.54736	2.57998	2.58385	2.60333	2.51464	2.57971	2.54913	2.58751	2.61387	2.6102	2.57291	2.58265	2.60272	2.60913	2.5961	2.59637	2.52531	2.51688	2.42968	2.45547	2.45272	2.54733	2.47334	2.51132	2.54383	2.48294	2.54152	2.53603	2.56156	2.54584	2.54388	2.5514	2.54047	2.48886	2.56051
2.49915	2.51244	2.54441	2.52385	2.53664	2.57153	2.46865	2.56069	2.5512	2.53286	2.53546	2.56896	2.4771	2.56379	2.55724	2.53512	2.54935	2.55564	2.56331	2.50698	2.55893	2.53569	2.55581	2.57027	2.57169	2.5462	2.54666	2.57163	2.56815	2.56519	2.5614	2.50778	2.50442	2.4271	2.46294	2.45565	2.5232	2.46564	2.49858	2.53153	2.49093	2.53705	2.53398	2.53457	2.5271	2.53533	2.53744	2.52672	2.49794	2.53635
2.48682	2.50104	2.51353	2.50365	2.5216	2.5529	2.47293	2.53132	2.54022	2.51683	2.51646	2.54797	2.46612	2.53497	2.5442	2.5166	2.53297	2.52543	2.5428	2.48962	2.53398	2.51706	2.53203	2.54849	2.55155	2.52467	2.52928	2.55004	2.5496	2.5513	2.55329	2.5049	2.50698	2.42636	2.46162	2.44069	2.52127	2.45947	2.50089	2.52535	2.48272	2.5374	2.52497	2.53204	2.52092	2.51257	2.53114	2.51702	2.48372	2.51206
2.50844	2.51898	2.55837	2.54576	2.55905	2.6024	2.48372	2.59334	2.58073	2.54467	2.55554	2.60998	2.47711	2.5969	2.58649	2.53743	2.57875	2.56805	2.59628	2.50498	2.56437	2.54231	2.58515	2.60279	2.60788	2.56363	2.58117	2.60211	2.61031	2.60269	2.60507	2.51926	2.52415	2.43552	2.48222	2.46192	2.54408	2.48425	2.52231	2.56446	2.5163	2.56967	2.55882	2.58077	2.56201	2.57373	2.56549	2.55283	2.50348	2.55828
2.50277	2.52151	2.56182	2.53845	2.56018	2.59947	2.47904	2.58622	2.58457	2.54543	2.55851	2.59878	2.48325	2.58386	2.58859	2.5402	2.57255	2.56547	2.5934	2.49884	2.57303	2.5496	2.57761	2.60407	2.60231	2.56046	2.57314	2.60501	2.60481	2.60585	2.59723	2.52631	2.52958	2.43146	2.48643	2.45048	2.54056	2.47989	2.51808	2.5548	2.50768	2.56641	2.54274	2.55989	2.54905	2.55697	2.55535	2.53368	2.48645	2.54816
2.48937	2.50121	2.52444	2.51187	2.52044	2.56189	2.47508	2.54709	2.54259	2.50842	2.51935	2.56035	2.47371	2.54186	2.54718	2.51362	2.51778	2.53195	2.55011	2.49144	2.5377	2.51715	2.53737	2.55321	2.5543	2.52349	2.53614	2.56293	2.55269	2.5536	2.5543	2.50443	2.49662	2.41706	2.46446	2.43923	2.51064	2.45642	2.49351	2.51886	2.47449	2.52487	2.5222	2.53449	2.52198	2.52207	2.53234	2.5239	2.47518	2.51483
2.49915	2.51174	2.54454	2.52802	2.54748	2.57562	2.48116	2.56177	2.5723	2.53293	2.53847	2.57401	2.47668	2.55637	2.56895	2.54408	2.55597	2.56375	2.56405	2.50809	2.5665	2.54766	2.55982	2.57837	2.58865	2.55924	2.56153	2.57276	2.58122	2.59163	2.57558	2.52367	2.52956	2.43526	2.47196	2.45687	2.54283	2.48267	2.5087	2.55391	2.49235	2.55383	2.53997	2.54907	2.53604	2.55406	2.55452	2.53358	2.48284	2.53893
2.51204	2.51925	2.56031	2.53257	2.55117	2.59267	2.4781	2.58564	2.58004	2.53416	2.54372	2.59588	2.47732	2.5887	2.57558	2.53885	2.5704	2.56367	2.58796	2.50006	2.56309	2.53584	2.57832	2.60118	2.60347	2.56067	2.57253	2.59645	2.59437	2.59512	2.59174	2.5232	2.52299	2.42763	2.47456	2.45799	2.53956	2.48724	2.51964	2.55448	2.49424	2.55554	2.55491	2.57197	2.55933	2.56429	2.56345	2.55507	2.50452	2.5688
2.50327	2.51961	2.5514	2.53609	2.55832	2.5939	2.48145	2.57973	2.58491	2.54622	2.54928	2.60616	2.48063	2.58027	2.58338	2.53928	2.58033	2.56223	2.59007	2.50049	2.56079	2.53324	2.57483	2.6014	2.5967	2.5572	2.56841	2.59481	2.60042	2.59303	2.59354	2.517	2.52228	2.42859	2.47862	2.44786	2.53787	2.47833	2.51782	2.54789	2.4945	2.5573	2.53805	2.55277	2.5366	2.55136	2.54677	2.52747	2.49353	2.54671
2.46673	2.50653	2.50057	2.50769	2.51637	2.5379	2.46406	2.51231	2.5509	2.51988	2.52483	2.55484	2.47844	2.5342	2.54872	2.50885	2.51494	2.52582	2.54157	2.49385	2.52688	2.50552	2.52228	2.5427	2.54704	2.52787	2.52123	2.54149	2.54948	2.54752	2.54082	2.50152	2.49831	2.43025	2.47046	2.45391	2.51438	2.45633	2.51915	2.52127	2.48598	2.53254	2.52439	2.54625	2.53175	2.53159	2.53522	2.52911	2.49737	2.53031
2.48809	2.52546	2.54998	2.5473	2.57038	2.60395	2.48524	2.58002	2.60041	2.55413	2.57599	2.63481	2.48514	2.60395	2.61191	2.5459	2.58185	2.58025	2.61696	2.52604	2.56796	2.54094	2.58037	2.61586	2.62528	2.59244	2.58584	2.61873	2.6312	2.61693	2.60249	2.54245	2.53997	2.43768	2.50248	2.46975	2.55747	2.48449	2.54989	2.57431	2.53348	2.59839	2.57406	2.61026	2.57944	2.59876	2.57857	2.57303	2.53337	2.57849
2.51535	2.52946	2.5696	2.54714	2.56821	2.62051	2.48401	2.59609	2.60194	2.55813	2.56569	2.61772	2.4858	2.60652	2.59473	2.54726	2.59415	2.57761	2.60823	2.53071	2.5671	2.55095	2.59513	2.61601	2.6157	2.58297	2.58739	2.63716	2.62501	2.6171	2.62962	2.54924	2.54491	2.44716	2.50304	2.47546	2.55953	2.49149	2.54441	2.56665	2.53021	2.58105	2.57681	2.59751	2.57924	2.59139	2.5778	2.56917	2.52845	2.56451
2.50138	2.5222	2.5591	2.53135	2.5617	2.59436	2.47521	2.58837	2.58739	2.54345	2.55889	2.60017	2.48433	2.59302	2.57704	2.5515	2.57167	2.57413	2.59208	2.51088	2.56953	2.54476	2.58545	2.59414	2.60328	2.5707	2.57094	2.60485	2.6019	2.60452	2.61015	2.54166	2.53931	2.44629	2.49009	2.47271	2.55465	2.48971	2.5351	2.55331	2.51444	2.5733	2.55424	2.5789	2.55814	2.57652	2.5706	2.55569	2.52122	2.56007
2.48628	2.50498	2.53865	2.5208	2.54581	2.57581	2.46966	2.56956	2.56782	2.53448	2.5561	2.60012	2.47451	2.58877	2.58227	2.53283	2.58054	2.56727	2.58746	2.50855	2.5526	2.52681	2.55767	2.60114	2.59472	2.56541	2.55834	2.56329	2.60681	2.57979	2.56509	2.5215	2.52037	2.43474	2.48482	2.46242	2.54724	2.48452	2.52633	2.54588	2.51091	2.56261	2.54816	2.58363	2.56278	2.56196	2.56633	2.54832	2.5119	2.55405
2.52158	2.53984	2.58688	2.55651	2.58301	2.64175	2.48517	2.61225	2.60704	2.56646	2.57986	2.64038	2.49457	2.61512	2.60767	2.55979	2.60152	2.58666	2.62755	2.52666	2.58207	2.56148	2.60937	2.63256	2.63353	2.59896	2.60313	2.64338	2.63996	2.62917	2.62196	2.55367	2.54816	2.44599	2.50337	2.48475	2.57083	2.49299	2.55412	2.58274	2.54802	2.59074	2.59106	2.61991	2.5956	2.60821	2.58635	2.58706	2.53729	2.57737
2.49178	2.52311	2.55415	2.53061	2.55979	2.61228	2.47799	2.5891	2.59318	2.55753	2.57316	2.61655	2.47809	2.6182	2.59985	2.54364	2.60602	2.57125	2.61412	2.52424	2.57018	2.54434	2.6025	2.6267	2.63082	2.59158	2.58712	2.61111	2.63498	2.62672	2.61177	2.53764	2.53528	2.43394	2.49138	2.47234	2.55275	2.48679	2.53595	2.56264	2.5174	2.57406	2.56462	2.60011	2.57351	2.58551	2.57302	2.56229	2.52467	2.57286
2.51137	2.52817	2.58171	2.54649	2.58119	2.61056	2.4824	2.59978	2.59346	2.55719	2.56481	2.61643	2.48758	2.60876	2.59618	2.56141	2.59156	2.5906	2.60945	2.51495	2.58433	2.55546	2.60017	2.62141	2.62912	2.59719	2.59636	2.6223	2.62284	2.62017	2.61399	2.53486	2.53174	2.43586	2.46753	2.47037	2.54134	2.47205	2.52548	2.55558	2.505	2.55202	2.56248	2.58515	2.56871	2.5441	2.57345	2.56113	2.51854	2.55851
2.49939	2.50942	2.56377	2.53625	2.56438	2.59606	2.47256	2.5824	2.57645	2.5385	2.56732	2.59242	2.48481	2.58387	2.5799	2.54206	2.57326	2.57765	2.58578	2.51365	2.56646	2.53985	2.5778	2.59544	2.60714	2.56659	2.58084	2.59961	2.61011	2.59114	2.59582	2.52519	2.52344	2.43065	2.48706	2.46046	2.53565	2.47086	2.52015	2.54953	2.51214	2.56087	2.54992	2.57599	2.55781	2.55804	2.5543	2.5488	2.51716	2.55039
2.49822	2.52184	2.5742	2.54783	2.56917	2.60101	2.48139	2.59807	2.57976	2.5592	2.57154	2.60668	2.4805	2.60766	2.59333	2.55045	2.59484	2.57686	2.59896	2.51846	2.57106	2.54678	2.59757	2.60951	2.62515	2.58209	2.60169	2.60682	2.62804	2.61396	2.60271	2.5335	2.52994	2.42979	2.48547	2.46667	2.55101	2.48318	2.52513	2.55591	2.51681	2.56253	2.55894	2.58592	2.56255	2.57623	2.56724	2.56077	2.5101	2.56149
2.51473	2.52035	2.58122	2.54268	2.58541	2.6142	2.47861	2.59966	2.58576	2.54537	2.56228	2.61054	2.48582	2.61071	2.59697	2.56135	2.5853	2.5881	2.60635	2.51523	2.58322	2.55867	2.59201	2.61467	2.61576	2.5912	2.58812	2.61501	2.61918	2.60872	2.60836	2.53768	2.53218	2.4328	2.46048	2.46888	2.54791	2.47637	2.52669	2.5521	2.49612	2.55971	2.5511	2.57719	2.5527	2.55004	2.5654	2.54918	2.51488	2.55839
2.51198	2.52901	2.57741	2.55388	2.58807	2.62603	2.47917	2.62066	2.59972	2.56312	2.58428	2.62683	2.48645	2.62353	2.61109	2.55754	2.60719	2.58972	2.62391	2.53584	2.58537	2.56459	2.6016	2.63378	2.63581	2.59261	2.60886	2.62287	2.6513	2.62674	2.6174	2.54381	2.54012	2.43549	2.49336	2.46682	2.5579	2.48475	2.54561	2.56869	2.52211	2.58553	2.57955	2.60455	2.58467	2.59131	2.58989	2.57732	2.52463	2.57232
2.50745	2.52172	2.58564	2.54659	2.59629	2.63594	2.47599	2.63383	2.61367	2.56706	2.58826	2.64958	2.48149	2.65195	2.62672	2.55386	2.61975	2.58886	2.64792	2.53104	2.58257	2.55589	2.63004	2.6507	2.66231	2.59837	2.6132	2.63572	2.66276	2.64002	2.62451	2.55837	2.55059	2.43669	2.49873	2.47721	2.57122	2.49286	2.5466	2.58043	2.52933	2.60216	2.58461	2.61603	2.59199	2.61288	2.59121	2.5867	2.53225	2.58664
2.50549	2.53271	2.57781	2.55364	2.58196	2.62386	2.48205	2.61503	2.60683	2.55861	2.57779	2.63839	2.48605	2.6399	2.61594	2.56186	2.61628	2.58921	2.63331	2.52599	2.58994	2.55081	2.61627	2.63834	2.63857	2.60158	2.60689	2.62725	2.65511	2.63602	2.63498	2.53733	2.53753	2.43823	2.49062	2.46908	2.55201	2.48541	2.53491	2.57236	2.51411	2.57207	2.57187	2.60161	2.57721	2.59157	2.58479	2.57537	2.5229	2.56798
2.515	2.53106	2.58704	2.54863	2.59017	2.65481	2.49205	2.63849	2.62062	2.57251	2.57575	2.6623	2.48104	2.64557	2.63145	2.5492	2.62142	2.57642	2.64573	2.51965	2.56958	2.54496	2.61338	2.64257	2.6481	2.59045	2.61019	2.63555	2.6562	2.62968	2.63206	2.55517	2.55284	2.43806	2.49732	2.47633	2.57497	2.49775	2.54483	2.58114	2.53539	2.60922	2.59581	2.62472	2.59899	2.61354	2.5894	2.58738	2.53554	2.58223
2.50661	2.52559	2.57383	2.5381	2.57584	2.61869	2.48017	2.60017	2.59946	2.54738	2.56704	2.62623	2.47526	2.618	2.60367	2.54992	2.59291	2.57755	2.6198	2.52003	2.57075	2.54005	2.59715	2.62255	2.62611	2.58498	2.59009	2.6208	2.62722	2.6185	2.61977	2.54194	2.53556	2.43816	2.48702	2.48099	2.55587	2.48652	2.54031	2.57166	2.52221	2.58487	2.57807	2.60317	2.58162	2.5909	2.58303	2.57978	2.53266	2.57927
2.51502	2.52221	2.56853	2.54251	2.56983	2.6106	2.4794	2.60457	2.58854	2.54429	2.56096	2.61258	2.4819	2.61219	2.58864	2.53842	2.59443	2.56304	2.61081	2.51539	2.55824	2.53899	2.59232	2.60998	2.61618	2.57183	2.58368	2.6165	2.61514	2.60202	2.61071	2.53923	2.53334	2.43089	2.49071	2.47313	2.55655	2.487	2.52837	2.57032	2.51346	2.5751	2.57797	2.59406	2.57445	2.58591	2.57434	2.56932	2.52712	2.56726
2.4885	2.50569	2.54556	2.53017	2.55275	2.56716	2.47544	2.55352	2.56253	2.54242	2.55146	2.56282	2.47765	2.55849	2.56354	2.54449	2.55797	2.55646	2.55506	2.50605	2.56133	2.54134	2.56205	2.57944	2.5883	2.5631	2.5616	2.57028	2.57879	2.58273	2.57656	2.50934	2.51898	2.43382	2.47976	2.46639	2.5222	2.47453	2.51894	2.52802	2.51262	2.53838	2.55005	2.55638	2.54595	2.55562	2.54018	2.5481	2.50493	2.53707
2.49602	2.5064	2.54507	2.51492	2.54709	2.58	2.47711	2.57107	2.56082	2.52864	2.54399	2.57444	2.47152	2.57758	2.56928	2.52384	2.56176	2.5489	2.58094	2.50936	2.54077	2.52863	2.56978	2.58237	2.58081	2.55802	2.55184	2.57854	2.58267	2.5714	2.57361	2.52428	2.52279	2.42813	2.47883	2.46196	2.53545	2.47917	2.5191	2.54292	2.51282	2.55566	2.54703	2.56488	2.55014	2.55447	2.5587	2.54819	2.51771	2.5463
2.48576	2.4964	2.52711	2.51058	2.53161	2.5553	2.47343	2.54618	2.54689	2.52289	2.52948	2.54353	2.46711	2.5469	2.54403	2.5268	2.53301	2.54258	2.54228	2.49619	2.54562	2.52331	2.54285	2.5585	2.56024	2.53278	2.53219	2.55061	2.56067	2.55078	2.54711	2.50984	2.51098	2.42628	2.45999	2.45967	2.51213	2.4639	2.50132	2.52196	2.49898	2.52239	2.52761	2.54103	2.53044	2.52102	2.53618	2.53034	2.50087	2.53023
2.50614	2.52277	2.55936	2.53201	2.55843	2.61052	2.48305	2.59933	2.59184	2.54879	2.55879	2.59869	2.48101	2.58195	2.58515	2.53609	2.57372	2.55284	2.58805	2.50929	2.54134	2.53821	2.57392	2.59004	2.60206	2.5746	2.56889	2.60262	2.60293	2.59589	2.59888	2.53268	2.53541	2.43468	2.49906	2.4703	2.5534	2.48701	2.53531	2.57012	2.52736	2.57386	2.56652	2.58258	2.56719	2.58362	2.5681	2.56547	2.53482	2.56592
2.50696	2.52386	2.55172	2.53627	2.55067	2.60304	2.47832	2.57505	2.58236	2.54036	2.55598	2.59254	2.4873	2.57995	2.576	2.54028	2.56841	2.55104	2.58605	2.50847	2.55089	2.54051	2.57461	2.5888	2.58889	2.56196	2.57139	2.60127	2.59868	2.59281	2.58649	2.52461	2.52666	2.4394	2.50285	2.47604	2.54021	2.48466	2.54872	2.56216	2.52891	2.57394	2.56887	2.57623	2.57043	2.57452	2.56147	2.56214	2.52398	2.55093
2.50732	2.5194	2.56343	2.53837	2.56639	2.60371	2.47731	2.58909	2.58708	2.54542	2.56134	2.60397	2.49163	2.58953	2.59673	2.54654	2.57774	2.57676	2.59093	2.508	2.56612	2.54383	2.58683	2.60244	2.60597	2.56952	2.58516	2.59754	2.61405	2.60061	2.60454	2.52622	2.54251	2.44037	2.49797	2.47784	2.54986	2.49399	2.54113	2.55578	2.53182	2.57258	2.56866	2.58394	2.57809	2.58106	2.57425	2.57104	2.52029	2.55234
2.50383	2.51268	2.5555	2.53286	2.54727	2.58152	2.46555	2.56453	2.56165	2.53387	2.53941	2.57101	2.49132	2.56032	2.5547	2.54351	2.55548	2.55734	2.56228	2.50488	2.54571	2.53191	2.55714	2.56752	2.5657	2.5524	2.55356	2.57304	2.57308	2.57087	2.57954	2.55047	2.54908	2.45773	2.49334	2.50088	2.54408	2.50699	2.53499	2.55618	2.5402	2.55147	2.56789	2.57572	2.5725	2.55687	2.56868	2.57044	2.50887	2.54667
2.52549	2.52397	2.56971	2.53992	2.57295	2.59938	2.49076	2.59862	2.58475	2.55337	2.57109	2.59435	2.49805	2.58779	2.57631	2.55876	2.58357	2.56831	2.59412	2.5139	2.56395	2.54762	2.58116	2.59784	2.59798	2.57729	2.57717	2.60221	2.60109	2.59467	2.59979	2.55501	2.55827	2.45451	2.51745	2.49235	2.57609	2.50626	2.55877	2.57738	2.55034	2.59122	2.57591	2.59583	2.58279	2.59395	2.57425	2.58233	2.53713	2.57284
2.5185	2.52912	2.57471	2.54939	2.56745	2.62433	2.48362	2.59754	2.59645	2.54951	2.56102	2.61851	2.49382	2.59981	2.58909	2.5494	2.58351	2.56763	2.6048	2.52118	2.56364	2.55282	2.58941	2.59915	2.60702	2.57472	2.58865	2.61104	2.61581	2.60659	2.608	2.55567	2.55222	2.44859	2.49885	2.49015	2.56086	2.49321	2.55722	2.57351	2.54514	2.57707	2.59097	2.61896	2.59018	2.58482	2.57575	2.57995	2.53028	2.56325
2.53186	2.53252	2.58939	2.54797	2.57778	2.64073	2.48574	2.62249	2.60746	2.55954	2.5741	2.62782	2.49952	2.61234	2.6011	2.5513	2.60364	2.56859	2.62093	2.51769	2.55939	2.54249	2.59885	2.61724	2.61921	2.57611	2.60246	2.62999	2.63225	2.61368	2.6249	2.57107	2.56339	2.45307	2.51968	2.49154	2.57043	2.50499	2.56864	2.59385	2.56136	2.60978	2.59172	2.61652	2.60003	2.61458	2.58807	2.58385	2.54595	2.57759
2.51518	2.5252	2.56699	2.53776	2.56816	2.6021	2.47397	2.59594	2.58456	2.54307	2.55627	2.60475	2.4857	2.59342	2.58545	2.54594	2.58556	2.57135	2.59454	2.51706	2.5583	2.54271	2.59374	2.59862	2.60107	2.57275	2.57572	2.60587	2.60158	2.59385	2.61043	2.53954	2.54508	2.43882	2.49818	2.47194	2.56837	2.49746	2.52847	2.54761	2.51443	2.5747	2.55587	2.58418	2.56668	2.58034	2.56748	2.55666	2.50715	2.55007
2.47638	2.48857	2.51277	2.50162	2.50119	2.52679	2.4545	2.52356	2.51742	2.50114	2.504	2.52887	2.4668	2.51655	2.5134	2.49981	2.51225	2.50528	2.52253	2.48225	2.50499	2.49382	2.51612	2.52306	2.52141	2.5094	2.50899	2.51925	2.51948	2.52534	2.52414	2.47384	2.48237	2.42879	2.46775	2.44625	2.49329	2.45908	2.49284	2.50591	2.49484	2.52053	2.51279	2.5208	2.51157	2.51178	2.50415	2.50129	2.48314	2.50382
2.472	2.48847	2.49359	2.48684	2.49518	2.52044	2.45701	2.50797	2.51881	2.49866	2.49753	2.51264	2.46535	2.50388	2.50954	2.50368	2.50154	2.5162	2.51028	2.4828	2.50512	2.49293	2.499	2.51792	2.51289	2.50429	2.49699	2.51429	2.50607	2.50819	2.52002	2.50349	2.50825	2.44321	2.47155	2.46536	2.50422	2.47507	2.50115	2.49284	2.49794	2.50473	2.50711	2.5202	2.52143	2.5062	2.5053	2.51776	2.49097	2.49729
2.46413	2.47716	2.48875	2.4811	2.49396	2.51145	2.44058	2.50151	2.49923	2.48343	2.48457	2.49892	2.45346	2.49654	2.49989	2.48205	2.49313	2.49663	2.49864	2.47014	2.48093	2.47517	2.49669	2.50256	2.49921	2.48819	2.49526	2.51096	2.50342	2.50375	2.50113	2.47957	2.47806	2.42383	2.47221	2.43899	2.48282	2.45255	2.4849	2.49138	2.47815	2.49893	2.48526	2.49594	2.48863	2.50194	2.48518	2.4934	2.47615	2.49385
2.4539	2.47721	2.47348	2.4667	2.47156	2.49702	2.43369	2.48556	2.49188	2.47456	2.47606	2.49266	2.44988	2.48285	2.48581	2.47244	2.47452	2.49057	2.48578	2.45607	2.48339	2.46536	2.48229	2.48823	2.48679	2.47891	2.47477	2.49227	2.48285	2.48625	2.48852	2.4709	2.47404	2.41982	2.44787	2.44364	2.47377	2.46141	2.46936	2.46284	2.46501	2.47325	2.47708	2.49252	2.48336	2.47618	2.4769	2.48399	2.45762	2.48267
2.4829	2.48741	2.50654	2.49975	2.50584	2.52735	2.46153	2.51154	2.52447	2.49701	2.497	2.51287	2.46561	2.51556	2.5134	2.50563	2.50907	2.51641	2.50896	2.47706	2.50735	2.49484	2.51006	2.51884	2.51729	2.50401	2.50345	2.52273	2.51131	2.51318	2.51695	2.49738	2.50245	2.42893	2.48066	2.45756	2.50291	2.46388	2.50628	2.51127	2.50374	2.51331	2.51213	2.51748	2.51538	2.51088	2.50345	2.51619	2.4907	2.50843
2.45074	2.45724	2.46888	2.45271	2.46403	2.487	2.44071	2.47763	2.48037	2.4644	2.46919	2.47374	2.43409	2.47271	2.47725	2.46156	2.46621	2.48033	2.47888	2.44534	2.46796	2.46149	2.47146	2.4815	2.48033	2.46556	2.46795	2.4771	2.47661	2.47923	2.48444	2.4552	2.46067	2.41226	2.44645	2.44133	2.45531	2.44236	2.45547	2.45145	2.45663	2.45895	2.47263	2.47919	2.47772	2.47027	2.4653	2.47271	2.45876	2.46411
2.49674	2.50931	2.52496	2.52361	2.53265	2.55309	2.47651	2.5406	2.54614	2.5244	2.52605	2.54991	2.47936	2.54376	2.54424	2.52008	2.53183	2.53339	2.54856	2.49537	2.51687	2.50627	2.53715	2.54865	2.53862	2.52864	2.52759	2.55101	2.5376	2.53341	2.53969	2.5041	2.50946	2.43026	2.4865	2.46927	2.51664	2.46927	2.5232	2.52003	2.51719	2.53064	2.52859	2.54505	2.53342	2.53721	2.52386	2.53413	2.50921	2.52362
2.49648	2.50449	2.52742	2.51907	2.52689	2.55641	2.47059	2.54258	2.54714	2.52297	2.52614	2.55094	2.47954	2.54455	2.54036	2.52999	2.5289	2.54415	2.54635	2.49626	2.53452	2.52143	2.54127	2.54595	2.54101	2.52979	2.53017	2.54884	2.53956	2.54201	2.55431	2.50463	2.51859	2.43554	2.47595	2.47669	2.51599	2.48168	2.51185	2.50587	2.50691	2.51792	2.5441	2.54814	2.5455	2.52463	2.52432	2.54103	2.49685	2.51
2.51723	2.52445	2.55991	2.54521	2.5675	2.60833	2.47686	2.59161	2.58916	2.55067	2.56299	2.59801	2.48503	2.58992	2.58069	2.54958	2.57366	2.56254	2.59682	2.51415	2.55836	2.54134	2.57594	2.59755	2.60108	2.56064	2.57483	2.602	2.60369	2.59094	2.60192	2.52801	2.53676	2.44331	2.50667	2.48376	2.54614	2.48773	2.5464	2.57188	2.53741	2.57699	2.57182	2.58574	2.57617	2.57728	2.57673	2.57361	2.53332	2.55426
2.51771	2.5309	2.57816	2.54391	2.57888	2.6253	2.48665	2.61102	2.60272	2.55203	2.57139	2.60267	2.49045	2.61344	2.58527	2.54976	2.61068	2.56868	2.60534	2.51305	2.55177	2.54143	2.60005	2.61857	2.61635	2.57359	2.59741	2.61712	2.61643	2.6032	2.61757	2.55564	2.5514	2.44522	2.50218	2.48207	2.57195	2.5	2.55563	2.56924	2.54258	2.58701	2.56383	2.58628	2.56907	2.58784	2.5716	2.56962	2.53677	2.57317
2.48996	2.50162	2.51937	2.51316	2.53261	2.55218	2.46519	2.53644	2.54553	2.51331	2.52305	2.53086	2.47272	2.5347	2.53243	2.52264	2.53187	2.54526	2.5281	2.496	2.52446	2.51798	2.53555	2.54166	2.5424	2.52982	2.53309	2.54341	2.54506	2.54697	2.54591	2.52513	2.52539	2.44177	2.49849	2.48199	2.52936	2.49054	2.5276	2.53567	2.52202	2.54267	2.52407	2.53978	2.52453	2.53001	2.5234	2.53769	2.51033	2.53555
2.48252	2.49398	2.50847	2.49567	2.5038	2.53143	2.45768	2.51528	2.51779	2.50473	2.49846	2.52234	2.4657	2.50851	2.50772	2.51137	2.50763	2.52174	2.5143	2.48609	2.50834	2.49996	2.50939	2.51538	2.51975	2.51137	2.50013	2.51615	2.51211	2.52138	2.51741	2.49235	2.49678	2.43203	2.46408	2.45849	2.49687	2.47181	2.49258	2.50577	2.4869	2.50414	2.50904	2.51765	2.51038	2.502	2.49953	2.50853	2.47787	2.50196
2.48309	2.48931	2.50248	2.49839	2.50941	2.52331	2.46297	2.5203	2.51788	2.50331	2.5052	2.52538	2.4591	2.51399	2.51922	2.50009	2.52025	2.51615	2.51624	2.4841	2.50606	2.4962	2.51345	2.52585	2.51914	2.50292	2.50795	2.51513	2.51239	2.50888	2.51584	2.5049	2.50277	2.439	2.4672	2.467	2.51152	2.48141	2.50869	2.51072	2.49118	2.52207	2.51143	2.52394	2.51105	2.51473	2.51301	2.51744	2.4935	2.50852
2.4976	2.4999	2.52351	2.50663	2.52057	2.55064	2.46527	2.53205	2.54083	2.51528	2.51341	2.53039	2.47236	2.53217	2.5266	2.51214	2.53128	2.5293	2.52661	2.48779	2.52684	2.50823	2.5252	2.53477	2.53562	2.5246	2.52279	2.53884	2.53268	2.5408	2.53808	2.50852	2.51143	2.44206	2.49513	2.47472	2.52048	2.48474	2.51982	2.52537	2.51036	2.52636	2.52281	2.539	2.52457	2.52913	2.522	2.53154	2.50473	2.52023
2.4958	2.50481	2.51919	2.51225	2.52411	2.5634	2.46491	2.55573	2.5515	2.51378	2.52108	2.55344	2.46712	2.54642	2.54267	2.50429	2.53892	2.533	2.54828	2.49057	2.52011	2.4997	2.53862	2.55199	2.54436	2.51899	2.53979	2.53861	2.54444	2.54319	2.54606	2.52518	2.5265	2.44601	2.49477	2.47385	2.53207	2.48806	2.53009	2.54388	2.50775	2.54672	2.54079	2.55068	2.54093	2.54148	2.5484	2.54144	2.50537	2.54377
2.51186	2.50924	2.5516	2.52258	2.54526	2.58161	2.47467	2.57608	2.56326	2.5315	2.53663	2.58519	2.46026	2.57603	2.57931	2.50834	2.56726	2.54528	2.58544	2.49891	2.53287	2.50163	2.55828	2.57862	2.57256	2.53539	2.55823	2.56288	2.57615	2.55656	2.57127	2.5323	2.53118	2.44071	2.49067	2.4709	2.54333	2.49309	2.53534	2.55017	2.51975	2.5737	2.55096	2.56587	2.55385	2.56586	2.557	2.54391	2.51979	2.55494
2.49705	2.51575	2.53582	2.51421	2.52293	2.57568	2.47488	2.55767	2.55529	2.51982	2.52546	2.56928	2.47073	2.55373	2.56021	2.51528	2.53647	2.54489	2.55967	2.49136	2.52769	2.51557	2.54079	2.56077	2.55749	2.53401	2.53809	2.56688	2.56498	2.56404	2.56224	2.50412	2.50915	2.43186	2.48146	2.46533	2.51039	2.47046	2.51939	2.54007	2.4956	2.54269	2.54667	2.56082	2.54485	2.54927	2.53766	2.55219	2.50735	2.52677
2.43835	2.45147	2.45741	2.45071	2.45934	2.48094	2.42824	2.47673	2.47723	2.45289	2.46231	2.47995	2.4277	2.4743	2.47027	2.44373	2.47167	2.45271	2.46812	2.44134	2.44618	2.43547	2.47492	2.47455	2.46571	2.45664	2.46569	2.47577	2.47771	2.47763	2.47763	2.43653	2.43608	2.3902	2.43151	2.40363	2.45071	2.42615	2.44728	2.46079	2.43693	2.46069	2.46612	2.47317	2.46892	2.46445	2.47056	2.46591	2.4428	2.46774
2.48029	2.49427	2.50981	2.489	2.50861	2.52769	2.45407	2.52418	2.51749	2.49373	2.51004	2.52397	2.46467	2.51607	2.51894	2.49214	2.51011	2.5084	2.51862	2.47885	2.49761	2.49024	2.51408	2.52201	2.51517	2.50639	2.50841	2.52328	2.51861	2.5176	2.52613	2.48835	2.49279	2.43014	2.46594	2.4461	2.50091	2.4584	2.49226	2.50274	2.48604	2.51563	2.50656	2.51431	2.50699	2.51245	2.50763	2.5073	2.48452	2.51201
2.49996	2.51289	2.54832	2.52128	2.55012	2.60661	2.47519	2.58472	2.57754	2.53573	2.56048	2.6051	2.47599	2.58831	2.57635	2.52873	2.56815	2.5416	2.59317	2.51523	2.53834	2.51643	2.5702	2.58681	2.59167	2.5432	2.56635	2.59452	2.59374	2.57191	2.59371	2.51381	2.51025	2.43038	2.48681	2.45208	2.53421	2.46795	2.53321	2.55337	2.50403	2.55166	2.54673	2.57626	2.56388	2.56005	2.55105	2.55184	2.50865	2.54381
2.47787	2.49009	2.51917	2.499	2.52399	2.55076	2.46344	2.54061	2.54843	2.50994	2.52424	2.55731	2.47285	2.5336	2.54227	2.49925	2.52907	2.52296	2.54915	2.47586	2.51232	2.49997	2.53199	2.54454	2.53941	2.51716	2.53558	2.54797	2.55236	2.54105	2.54068	2.49501	2.49613	2.42435	2.47056	2.4504	2.50458	2.46737	2.5036	2.52879	2.48872	2.52539	2.52737	2.53958	2.53093	2.52504	2.52207	2.52561	2.4885	2.52126
2.50329	2.52634	2.5537	2.5354	2.55732	2.60858	2.4817	2.59485	2.58674	2.53977	2.55041	2.59907	2.4793	2.59005	2.58085	2.52508	2.57046	2.54607	2.59906	2.50694	2.53755	2.52215	2.57918	2.58971	2.58576	2.54937	2.57047	2.59183	2.59028	2.58704	2.59747	2.52319	2.52355	2.43612	2.49733	2.46625	2.53937	2.48053	2.53188	2.56069	2.50648	2.56235	2.5584	2.57924	2.56492	2.57329	2.56118	2.55812	2.51181	2.55621
2.46136	2.47202	2.48794	2.48256	2.49241	2.50506	2.43803	2.50309	2.50296	2.48076	2.48443	2.51231	2.44769	2.5007	2.49842	2.48049	2.50197	2.48652	2.50278	2.46488	2.48107	2.47977	2.50081	2.50735	2.5021	2.48995	2.49674	2.50995	2.50348	2.49921	2.50643	2.46167	2.46822	2.40875	2.4388	2.42916	2.47568	2.44167	2.46584	2.47599	2.45889	2.49697	2.48252	2.49735	2.47833	2.49233	2.48161	2.48342	2.46298	2.49229
2.47911	2.50044	2.51569	2.50213	2.52371	2.54748	2.46017	2.54627	2.54167	2.51277	2.52981	2.55532	2.46515	2.53307	2.54074	2.49784	2.5259	2.52236	2.54249	2.48296	2.51483	2.49629	2.5326	2.54123	2.53916	2.51554	2.5281	2.54098	2.54101	2.52906	2.53941	2.49944	2.50629	2.4269	2.46463	2.44848	2.52255	2.46673	2.50965	2.5231	2.48909	2.53064	2.52706	2.54434	2.52538	2.53462	2.52829	2.52831	2.49258	2.52679
2.45021	2.46113	2.46866	2.46423	2.47043	2.48754	2.43341	2.48867	2.48978	2.4702	2.46936	2.48914	2.44888	2.48202	2.48079	2.46183	2.4807	2.47253	2.48157	2.45112	2.47163	2.46199	2.48529	2.48957	2.48617	2.46856	2.48445	2.49188	2.48736	2.48705	2.49093	2.45312	2.45065	2.41389	2.44464	2.43277	2.46995	2.43935	2.45392	2.46938	2.46042	2.47743	2.47175	2.48238	2.47608	2.48072	2.47535	2.47172	2.46041	2.47502
2.43556	2.44757	2.44918	2.43499	2.44351	2.46516	2.41782	2.46433	2.45747	2.44266	2.44922	2.47195	2.42306	2.46299	2.46123	2.44498	2.45313	2.44706	2.46749	2.43641	2.44265	2.43561	2.45639	2.46051	2.45509	2.44658	2.44974	2.46274	2.46312	2.45266	2.46218	2.4329	2.43732	2.39794	2.42948	2.41278	2.44551	2.41537	2.44458	2.45193	2.43733	2.46523	2.45811	2.46272	2.46356	2.4544	2.46293	2.45719	2.43384	2.45197
2.43239	2.45086	2.46527	2.45492	2.46579	2.47409	2.43209	2.47112	2.47291	2.45272	2.45926	2.47038	2.43219	2.4698	2.4726	2.44932	2.46198	2.46095	2.46814	2.44244	2.45102	2.44343	2.47125	2.4738	2.46786	2.45804	2.47132	2.47247	2.47331	2.46994	2.47299	2.44985	2.43537	2.40729	2.44086	2.41417	2.44721	2.42476	2.44535	2.45419	2.44207	2.46365	2.4583	2.46676	2.46642	2.46552	2.46339	2.46203	2.43921	2.45809
2.5052	2.54039	2.56509	2.54509	2.57199	2.6138	2.48953	2.60453	2.59468	2.5493	2.5721	2.62257	2.49426	2.609	2.60103	2.54533	2.59023	2.57331	2.61317	2.52021	2.56113	2.5374	2.59572	2.60032	2.59276	2.56674	2.57985	2.61175	2.6036	2.59696	2.60689	2.53216	2.54097	2.43809	2.48809	2.47721	2.55135	2.4972	2.53299	2.55927	2.52701	2.57789	2.56557	2.59349	2.57394	2.57718	2.56152	2.5653	2.52225	2.5572
2.46405	2.49151	2.50254	2.48205	2.50296	2.52471	2.45584	2.50527	2.51598	2.49609	2.50337	2.531	2.46434	2.51293	2.51995	2.4922	2.50414	2.4972	2.5179	2.48098	2.50004	2.49652	2.50697	2.51467	2.51228	2.50287	2.5007	2.51048	2.50891	2.51088	2.50743	2.49138	2.49838	2.42732	2.46255	2.45411	2.50371	2.46729	2.49949	2.50254	2.49185	2.52114	2.50791	2.52089	2.51277	2.50729	2.50933	2.5087	2.48689	2.50653
2.42919	2.4209	2.44235	2.43441	2.4511	2.45819	2.41621	2.45419	2.45563	2.44407	2.44825	2.45873	2.42498	2.45345	2.45334	2.44687	2.45147	2.44979	2.45793	2.43486	2.45212	2.43659	2.45182	2.45925	2.45451	2.44221	2.45127	2.45639	2.45509	2.45464	2.45386	2.43137	2.42954	2.40352	2.41898	2.41471	2.43793	2.42009	2.43407	2.44545	2.43246	2.44266	2.4446	2.45199	2.45094	2.44764	2.44986	2.44613	2.43343	2.44752
2.5102	2.51498	2.57832	2.54892	2.58154	2.63503	2.48797	2.61537	2.61128	2.55555	2.57753	2.62817	2.48534	2.61831	2.60491	2.54979	2.60185	2.57981	2.62364	2.5127	2.57079	2.54362	2.61146	2.6228	2.63463	2.58764	2.6118	2.63334	2.64076	2.62228	2.63264	2.53069	2.53412	2.43269	2.49423	2.47401	2.54989	2.48313	2.53444	2.56441	2.51758	2.58215	2.56648	2.59961	2.5772	2.58316	2.57924	2.56407	2.51656	2.56937
2.52329	2.53452	2.57791	2.54205	2.57315	2.64182	2.47544	2.62727	2.6045	2.55387	2.57782	2.62433	2.49318	2.61538	2.59761	2.53936	2.60693	2.56252	2.61575	2.51256	2.55894	2.53689	2.603	2.62081	2.61632	2.56661	2.60043	2.62926	2.63138	2.60988	2.62715	2.54132	2.54199	2.44112	2.50813	2.47664	2.55912	2.49239	2.5508	2.581	2.52537	2.58513	2.58089	2.61023	2.59184	2.5948	2.58158	2.57302	2.5309	2.57454
2.51104	2.52774	2.55904	2.52498	2.55838	2.62445	2.47791	2.60629	2.59124	2.53974	2.5649	2.59989	2.47535	2.58777	2.57981	2.52192	2.57679	2.55892	2.59357	2.50907	2.549	2.52691	2.57729	2.59065	2.59527	2.55613	2.57846	2.61627	2.60015	2.58732	2.61776	2.51949	2.51712	2.4305	2.48993	2.45997	2.53753	2.47172	2.52752	2.55577	2.50902	2.56169	2.5649	2.58598	2.5744	2.57326	2.56513	2.5554	2.52201	2.55626
2.51596	2.52789	2.57658	2.54348	2.57689	2.63314	2.48296	2.609	2.60779	2.55257	2.57314	2.63306	2.48299	2.6131	2.60384	2.54851	2.58894	2.57913	2.62402	2.51894	2.56397	2.53547	2.60593	2.61216	2.62302	2.57446	2.60038	2.6352	2.629	2.6141	2.63899	2.53658	2.53223	2.42703	2.49251	2.45981	2.55195	2.47592	2.5303	2.55887	2.51751	2.57269	2.57176	2.60174	2.57904	2.58872	2.57336	2.57073	2.51802	2.56327
2.51304	2.535	2.57186	2.53257	2.56606	2.64212	2.47915	2.609	2.59955	2.54875	2.57842	2.6271	2.4782	2.61138	2.6007	2.53837	2.58233	2.57166	2.62034	2.51614	2.56011	2.53064	2.59409	2.60924	2.61558	2.56352	2.59111	2.62659	2.62314	2.6062	2.62211	2.53289	2.53037	2.42445	2.4909	2.454	2.55225	2.47886	2.531	2.56098	2.5105	2.57372	2.57143	2.59338	2.57942	2.58016	2.57417	2.56548	2.51287	2.56613
2.52549	2.53515	2.58501	2.54899	2.58904	2.63831	2.47856	2.62558	2.60863	2.56269	2.58399	2.6326	2.49171	2.62152	2.61211	2.5557	2.60498	2.58938	2.62747	2.52108	2.57882	2.55502	2.60284	2.62884	2.64072	2.58958	2.60533	2.63947	2.64565	2.62204	2.63003	2.5471	2.54389	2.43367	2.50146	2.47549	2.55985	2.4813	2.54267	2.57619	2.52933	2.59144	2.57667	2.60371	2.57962	2.59869	2.58015	2.57426	2.53459	2.57416
2.50703	2.53238	2.57705	2.54614	2.57326	2.64367	2.48616	2.61638	2.61333	2.55333	2.57595	2.63358	2.4897	2.61754	2.60417	2.54334	2.59103	2.57981	2.62434	2.5208	2.56083	2.5423	2.6026	2.61125	2.61442	2.57576	2.60061	2.62936	2.62823	2.60037	2.63058	2.53985	2.53726	2.43207	2.49523	2.46002	2.55727	2.48127	2.54289	2.57451	2.5199	2.59162	2.57828	2.5987	2.58338	2.58803	2.57549	2.57295	2.52021	2.56458
2.50682	2.52607	2.55014	2.5323	2.55824	2.60116	2.48623	2.58531	2.58311	2.54346	2.55472	2.59687	2.4818	2.58617	2.56701	2.53321	2.56956	2.55126	2.58649	2.50857	2.54595	2.52504	2.57177	2.59286	2.59273	2.5564	2.57082	2.60169	2.59698	2.5944	2.59033	2.52709	2.52953	2.43356	2.49473	2.45863	2.53731	2.47953	2.52881	2.55876	2.50926	2.56833	2.55579	2.57314	2.56029	2.56763	2.55775	2.55235	2.51464	2.54877
2.52001	2.54145	2.58761	2.54444	2.58152	2.64522	2.48753	2.63149	2.61484	2.55804	2.58176	2.63797	2.4849	2.62775	2.60382	2.53812	2.60171	2.57029	2.63096	2.52463	2.54724	2.53207	2.60954	2.61999	2.61714	2.57264	2.59861	2.63225	2.63216	2.61177	2.641	2.54253	2.54331	2.43626	2.49639	2.46437	2.56328	2.48678	2.54296	2.57543	2.52386	2.58776	2.58214	2.60727	2.58859	2.59204	2.5823	2.58142	2.52828	2.57372
2.50849	2.52578	2.56851	2.53726	2.56596	2.62067	2.48278	2.60096	2.59803	2.53993	2.56443	2.61809	2.48147	2.59902	2.59333	2.53755	2.58207	2.56466	2.61178	2.51999	2.55442	2.53831	2.58881	2.60338	2.60246	2.56695	2.58242	2.61754	2.6197	2.59757	2.61493	2.53644	2.52908	2.43541	2.50477	2.46941	2.55081	2.48281	2.53797	2.56102	2.5179	2.57888	2.5695	2.59254	2.58225	2.57823	2.57467	2.57347	2.51701	2.56266
2.52057	2.53562	2.58411	2.54365	2.57933	2.64304	2.48526	2.62186	2.61918	2.55415	2.58212	2.6366	2.48812	2.62436	2.60926	2.54193	2.59794	2.57116	2.63534	2.51591	2.56036	2.53309	2.6085	2.62748	2.62556	2.58125	2.59651	2.63844	2.63782	2.61838	2.63292	2.54042	2.53877	2.43244	2.49825	2.46223	2.55533	2.48253	2.53802	2.57278	2.52349	2.58562	2.58423	2.60785	2.58669	2.59646	2.58973	2.58035	2.53441	2.57815
2.52343	2.53263	2.57883	2.54658	2.57775	2.61653	2.48592	2.603	2.59492	2.55051	2.56892	2.61595	2.49408	2.61017	2.58816	2.54265	2.5985	2.56809	2.61878	2.52088	2.549	2.53052	2.59678	2.61407	2.60671	2.57649	2.59595	2.61713	2.61902	2.60755	2.61169	2.54423	2.54593	2.43932	2.49203	2.47103	2.55863	2.49312	2.5417	2.56879	2.52752	2.57595	2.56537	2.58723	2.57009	2.58335	2.5679	2.56193	2.52819	2.56425
2.51639	2.5375	2.5851	2.54903	2.57824	2.63804	2.48581	2.62103	2.61191	2.55889	2.58122	2.62568	2.48909	2.61236	2.59424	2.55381	2.6042	2.57368	2.61996	2.52234	2.55808	2.54302	2.60041	2.62047	2.62478	2.58124	2.60169	2.6445	2.63124	2.61497	2.63512	2.5533	2.54739	2.44347	2.51463	2.47939	2.56227	2.48456	2.55095	2.57868	2.54448	2.59513	2.58619	2.60733	2.59231	2.60306	2.58737	2.58558	2.53404	2.57398
2.50892	2.52765	2.57092	2.54774	2.57341	2.62759	2.48435	2.60134	2.59303	2.54599	2.56518	2.61319	2.48193	2.60346	2.59522	2.54509	2.59427	2.56982	2.60436	2.52528	2.5599	2.54366	2.6012	2.60049	2.59831	2.57558	2.58717	2.62687	2.61225	2.60153	2.6264	2.54667	2.54397	2.44153	2.5015	2.47875	2.56955	2.49083	2.53818	2.56106	2.52676	2.57922	2.56615	2.58898	2.57868	2.57958	2.57122	2.57021	2.52112	2.5711
2.50745	2.533	2.5598	2.5406	2.56418	2.60384	2.48791	2.58287	2.58319	2.53757	2.56669	2.60369	2.48219	2.58618	2.57536	2.53559	2.57079	2.55626	2.59549	2.51629	2.54862	2.53012	2.57934	2.59437	2.5909	2.5591	2.57965	2.603	2.60607	2.58731	2.60938	2.5347	2.53589	2.43929	2.49134	2.47177	2.54723	2.48138	2.53672	2.55109	2.51462	2.56756	2.55604	2.57793	2.56596	2.56781	2.5652	2.56074	2.52084	2.55533
2.51523	2.5314	2.58233	2.54625	2.5811	2.6408	2.48175	2.62587	2.61123	2.55586	2.57367	2.62586	2.49001	2.61361	2.60612	2.54438	2.60857	2.56496	2.6172	2.50988	2.55197	2.53285	2.60965	2.62113	2.62339	2.57645	2.60079	2.62674	2.6268	2.60739	2.62257	2.54203	2.53692	2.43984	2.50218	2.47063	2.5594	2.48669	2.54286	2.56973	2.52832	2.59005	2.57318	2.60373	2.58013	2.59631	2.5747	2.57856	2.53044	2.56764
2.45258	2.46469	2.46186	2.45577	2.47252	2.47876	2.44474	2.46759	2.48121	2.46081	2.47055	2.47899	2.4493	2.47343	2.478	2.46277	2.46817	2.47504	2.46878	2.45051	2.46694	2.46163	2.4721	2.4827	2.48037	2.47162	2.47104	2.4797	2.47904	2.48231	2.47572	2.44919	2.4538	2.40595	2.44673	2.42307	2.45754	2.43656	2.46001	2.47257	2.45085	2.46822	2.47205	2.47437	2.47296	2.46726	2.47681	2.47388	2.45181	2.47421
2.52545	2.53201	2.58428	2.5666	2.61003	2.63531	2.48329	2.62525	2.61721	2.57702	2.58718	2.64988	2.48353	2.63377	2.62057	2.56984	2.62197	2.59433	2.63946	2.52323	2.58367	2.5676	2.62117	2.62936	2.63967	2.60318	2.62054	2.64047	2.63829	2.63369	2.62537	2.55895	2.55411	2.44397	2.49515	2.47999	2.57061	2.49778	2.54582	2.57796	2.52438	2.5852	2.58389	2.59694	2.58486	2.60084	2.58176	2.58307	2.53225	2.58654
2.50662	2.51346	2.57764	2.54752	2.57636	2.63699	2.48054	2.61459	2.61312	2.56356	2.57152	2.64109	2.48263	2.62551	2.61239	2.54463	2.59795	2.57536	2.63131	2.51715	2.56451	2.54026	2.60058	2.61985	2.62359	2.57829	2.59036	2.62382	2.62776	2.6103	2.618	2.54596	2.54193	2.43838	2.4916	2.47473	2.55823	2.49105	2.53207	2.55596	2.52322	2.58167	2.56721	2.59813	2.57754	2.58448	2.56997	2.56338	2.51802	2.56225
2.4412	2.44732	2.46405	2.45205	2.45286	2.47225	2.42284	2.46697	2.46968	2.45462	2.45903	2.47348	2.42659	2.47381	2.46523	2.44735	2.47053	2.46095	2.46878	2.44232	2.4553	2.45157	2.46892	2.46788	2.4675	2.46067	2.46471	2.4682	2.46767	2.47033	2.47532	2.44427	2.44479	2.39849	2.4379	2.41931	2.45275	2.43021	2.45375	2.47086	2.4481	2.46346	2.46514	2.48271	2.46336	2.46468	2.45996	2.46635	2.44207	2.46099
2.49058	2.49581	2.5231	2.51234	2.53835	2.55821	2.47164	2.54547	2.55551	2.5172	2.53018	2.55913	2.4756	2.54531	2.54984	2.5159	2.53444	2.53806	2.5551	2.49665	2.52633	2.50902	2.53819	2.55438	2.54536	2.52232	2.53713	2.55703	2.55888	2.546	2.55264	2.51309	2.51288	2.43598	2.47833	2.47139	2.52129	2.47699	2.51269	2.5374	2.50042	2.53731	2.52921	2.54393	2.53305	2.53993	2.53435	2.53367	2.49825	2.53394
2.50136	2.51547	2.54054	2.51335	2.54795	2.5886	2.47506	2.56947	2.57664	2.52743	2.54671	2.57676	2.4774	2.56688	2.57096	2.51931	2.55027	2.5436	2.56539	2.50229	2.52666	2.51234	2.55705	2.57663	2.5667	2.53893	2.55307	2.57523	2.57131	2.55982	2.57812	2.51372	2.5115	2.42669	2.48584	2.4569	2.52514	2.46886	2.51612	2.53924	2.51122	2.54559	2.5458	2.55902	2.54517	2.54736	2.54554	2.54286	2.51319	2.54121
2.50686	2.52831	2.54958	2.52675	2.56273	2.59226	2.48243	2.58433	2.57475	2.53894	2.54834	2.59124	2.4792	2.58732	2.57776	2.52502	2.56745	2.54519	2.59434	2.50538	2.53696	2.52297	2.5836	2.57723	2.57526	2.54876	2.56341	2.58911	2.58497	2.57631	2.58415	2.51886	2.51722	2.42603	2.48038	2.45984	2.52868	2.47854	2.5165	2.54612	2.51265	2.5641	2.55476	2.57664	2.56219	2.5609	2.558	2.55528	2.50626	2.54333
2.5114	2.52648	2.57139	2.53971	2.56649	2.61135	2.48741	2.60296	2.59318	2.54375	2.55979	2.61356	2.48187	2.60427	2.59073	2.52848	2.58896	2.55126	2.60876	2.50849	2.54421	2.52314	2.59022	2.59369	2.58671	2.55782	2.58313	2.60301	2.59806	2.58413	2.60701	2.52578	2.5251	2.4254	2.48647	2.46221	2.54272	2.48295	2.52693	2.54882	2.50898	2.56417	2.5605	2.58303	2.56801	2.56966	2.56767	2.56277	2.51735	2.55601
2.50044	2.51725	2.55353	2.53235	2.55205	2.59899	2.47568	2.5883	2.58097	2.54027	2.55488	2.59618	2.48124	2.58161	2.57913	2.52384	2.56782	2.55357	2.58712	2.51502	2.53867	2.52077	2.57171	2.58255	2.58006	2.55378	2.56755	2.59394	2.59192	2.57771	2.59604	2.52508	2.5247	2.42967	2.48425	2.45866	2.53574	2.48213	2.5303	2.54867	2.51199	2.56275	2.55576	2.5699	2.56676	2.55724	2.56266	2.55309	2.5111	2.54892
2.51398	2.53628	2.58296	2.55972	2.58817	2.62332	2.48658	2.61536	2.59952	2.56384	2.56977	2.61635	2.49925	2.60784	2.59506	2.54891	2.60148	2.579	2.61068	2.51649	2.57814	2.54969	2.60734	2.61539	2.6122	2.58009	2.6004	2.61861	2.62202	2.61561	2.61021	2.54574	2.55438	2.4467	2.49797	2.47954	2.56844	2.49995	2.54321	2.57107	2.5274	2.59004	2.5774	2.60575	2.5748	2.59107	2.57743	2.57065	2.52509	2.57865
2.49875	2.51124	2.54488	2.53393	2.54789	2.55806	2.46495	2.54974	2.55192	2.5326	2.53799	2.56316	2.48724	2.55291	2.55254	2.55071	2.54589	2.56065	2.56115	2.50321	2.56177	2.54038	2.55196	2.56818	2.56313	2.55176	2.54155	2.5542	2.55792	2.56632	2.55441	2.50776	2.51144	2.44371	2.48342	2.47333	2.52686	2.47786	2.5258	2.53863	2.51038	2.55372	2.54508	2.56116	2.54382	2.54841	2.53155	2.53786	2.49478	2.53042
2.51637	2.53849	2.5854	2.5476	2.57798	2.62555	2.49204	2.61485	2.60212	2.55116	2.57424	2.62061	2.49571	2.61036	2.60157	2.54475	2.60357	2.57154	2.61685	2.52496	2.55406	2.54374	2.60569	2.61194	2.60946	2.57584	2.58973	2.61918	2.6127	2.60228	2.6192	2.53941	2.54112	2.43365	2.49464	2.4776	2.56077	2.48964	2.53971	2.55856	2.52493	2.58145	2.5726	2.60095	2.58287	2.58799	2.57157	2.57503	2.53053	2.56412
2.50638	2.52277	2.5548	2.53743	2.55743	2.58664	2.47152	2.57937	2.56956	2.53521	2.55001	2.58828	2.48571	2.57905	2.56926	2.52979	2.57296	2.55585	2.58339	2.50663	2.54794	2.53259	2.57	2.57888	2.57861	2.55131	2.56134	2.57103	2.58067	2.58341	2.58349	2.52511	2.52249	2.43466	2.48502	2.46899	2.53957	2.48383	2.52288	2.54231	2.51658	2.56307	2.55116	2.56583	2.55257	2.55848	2.5503	2.54775	2.51356	2.55002
2.50077	2.50794	2.55643	2.53948	2.55698	2.58017	2.45956	2.57289	2.55855	2.53978	2.5457	2.57688	2.48741	2.56964	2.56532	2.54402	2.55353	2.55953	2.57302	2.50617	2.56082	2.5461	2.56628	2.58666	2.58829	2.57004	2.56459	2.57667	2.58444	2.58313	2.57402	2.52732	2.51953	2.44076	2.47845	2.46408	2.54694	2.48332	2.52368	2.5383	2.51366	2.57185	2.54188	2.56246	2.54212	2.55291	2.54484	2.54627	2.49613	2.54431
2.50365	2.51437	2.56252	2.54123	2.56725	2.57953	2.4734	2.58183	2.56895	2.54397	2.55277	2.57693	2.50004	2.58277	2.57793	2.54685	2.5834	2.57426	2.58103	2.51647	2.56729	2.55244	2.58736	2.6011	2.59697	2.56265	2.57656	2.584	2.59698	2.58609	2.59435	2.53262	2.5182	2.44099	2.47813	2.47057	2.54191	2.47295	2.52181	2.54447	2.50835	2.5607	2.54044	2.56797	2.5488	2.55592	2.54602	2.55813	2.50026	2.54732
2.5051	2.52602	2.56264	2.54546	2.56906	2.59575	2.48445	2.59009	2.58859	2.54948	2.55734	2.60038	2.49193	2.59189	2.58784	2.54766	2.58154	2.56677	2.59382	2.51876	2.56097	2.5422	2.58415	2.60246	2.60041	2.56772	2.57009	2.59166	2.5994	2.59621	2.60458	2.5296	2.53124	2.43661	2.48968	2.46605	2.54705	2.48379	2.52454	2.54307	2.5161	2.57399	2.54449	2.57255	2.55974	2.56467	2.54805	2.55214	2.51199	2.5455
2.4992	2.51783	2.55871	2.53863	2.56749	2.57549	2.47255	2.57669	2.57053	2.54389	2.55831	2.58336	2.48764	2.58423	2.57676	2.55394	2.56934	2.5692	2.58053	2.51635	2.56448	2.54805	2.57784	2.58469	2.58426	2.56955	2.56791	2.58251	2.58333	2.57889	2.58185	2.53013	2.52475	2.44332	2.4876	2.46916	2.5441	2.47934	2.51839	2.53589	2.51325	2.5628	2.54423	2.56988	2.5559	2.55758	2.55244	2.5474	2.5007	2.53638
2.50762	2.53393	2.56128	2.53528	2.56466	2.60714	2.4814	2.60031	2.59481	2.54626	2.55386	2.61276	2.48619	2.60143	2.59232	2.53888	2.58228	2.56464	2.59954	2.518	2.54975	2.54239	2.58564	2.59667	2.59906	2.56939	2.57556	2.60991	2.60005	2.5935	2.61015	2.53425	2.5407	2.43989	2.48716	2.46925	2.55188	2.4886	2.5342	2.55187	2.51454	2.57407	2.55939	2.58022	2.56784	2.56958	2.56177	2.55782	2.51547	2.55579
2.50976	2.5067	2.57633	2.54379	2.56892	2.61602	2.47137	2.61564	2.59943	2.55458	2.56734	2.61933	2.4898	2.60886	2.59019	2.54607	2.59445	2.56952	2.60056	2.50699	2.56061	2.53173	2.60295	2.60468	2.60851	2.56899	2.59473	2.6323	2.62069	2.60617	2.61856	2.54098	2.53544	2.43822	2.49619	2.47504	2.55617	2.48495	2.53779	2.56401	2.52107	2.58353	2.57519	2.59896	2.5763	2.59129	2.58087	2.56936	2.52354	2.5683
2.51589	2.52991	2.58013	2.55053	2.57261	2.63008	2.48409	2.61563	2.60406	2.55548	2.56907	2.62595	2.48985	2.61088	2.59577	2.53789	2.5964	2.56279	2.61807	2.51944	2.54991	2.53597	2.59996	2.60903	2.6058	2.57354	2.59019	2.62007	2.60433	2.60576	2.62653	2.5338	2.53251	2.43023	2.49041	2.46582	2.55977	2.48476	2.53672	2.55941	2.52314	2.57886	2.57585	2.60129	2.57681	2.58615	2.57516	2.56566	2.52519	2.5628
2.51262	2.53052	2.56211	2.52915	2.55463	2.59324	2.48019	2.59174	2.57782	2.53605	2.55442	2.59495	2.48429	2.5865	2.57551	2.52435	2.58132	2.54729	2.58943	2.5075	2.53414	2.52512	2.57048	2.58151	2.57698	2.55185	2.56284	2.59268	2.5788	2.57851	2.59126	2.52239	2.52063	2.43199	2.48045	2.46562	2.53735	2.47752	2.52549	2.54285	2.51198	2.56751	2.54721	2.57748	2.56171	2.5688	2.55449	2.55264	2.52152	2.54377
2.51529	2.53148	2.58069	2.55013	2.56676	2.62994	2.49187	2.61493	2.60558	2.55302	2.57396	2.63102	2.49296	2.61504	2.59946	2.54629	2.60031	2.56987	2.62019	2.5126	2.55703	2.53879	2.6021	2.60807	2.61339	2.57971	2.59958	2.63303	2.61126	2.60645	2.63944	2.53197	2.53564	2.43397	2.49262	2.46312	2.55633	2.48553	2.54011	2.56646	2.52057	2.58033	2.57166	2.59854	2.57791	2.58689	2.57636	2.56553	2.52559	2.55877
2.50845	2.5283	2.57038	2.5343	2.55942	2.62265	2.4823	2.60979	2.59784	2.54213	2.56377	2.62272	2.48234	2.60384	2.59535	2.53257	2.58654	2.55884	2.61486	2.51744	2.54603	2.52758	2.58508	2.60162	2.59839	2.56458	2.58372	2.61273	2.60159	2.59598	2.62207	2.52016	2.52147	2.42733	2.48446	2.45159	2.5462	2.48086	2.53284	2.55939	2.51062	2.57385	2.5708	2.59933	2.57639	2.58032	2.57168	2.56227	2.52234	2.55562
2.50283	2.52218	2.5443	2.52442	2.54737	2.58135	2.47689	2.56655	2.55623	2.52706	2.5387	2.57025	2.48027	2.56731	2.55616	2.52538	2.5557	2.53668	2.56628	2.50763	2.53576	2.52997	2.56404	2.57032	2.56931	2.5474	2.55227	2.57408	2.57037	2.56396	2.57197	2.51896	2.51572	2.43459	2.49145	2.46709	2.53005	2.48177	2.52424	2.54541	2.51252	2.5585	2.54886	2.56081	2.55352	2.5559	2.54755	2.55074	2.51961	2.54597
2.49761	2.51266	2.54597	2.53214	2.54604	2.58632	2.478	2.57248	2.56338	2.53532	2.54026	2.57977	2.48563	2.5732	2.5631	2.5262	2.56293	2.53832	2.57603	2.50544	2.53044	2.51795	2.56659	2.56466	2.57352	2.54466	2.55196	2.58378	2.582	2.57429	2.57383	2.52681	2.51836	2.43312	2.48289	2.46699	2.53329	2.47517	2.52427	2.5455	2.51425	2.55777	2.55705	2.57173	2.55762	2.55417	2.55063	2.55058	2.50726	2.54621
2.51888	2.53455	2.58504	2.55256	2.58489	2.6431	2.49533	2.62292	2.60867	2.56384	2.58734	2.63414	2.49628	2.62656	2.60605	2.55641	2.61385	2.56994	2.63207	2.5145	2.56673	2.55246	2.61561	2.62544	2.62917	2.58158	2.61182	2.63757	2.63852	2.62361	2.63327	2.54104	2.53736	2.43323	2.49989	2.47328	2.55762	2.48869	2.54232	2.58291	2.52847	2.58738	2.58134	2.61292	2.59083	2.59122	2.58323	2.57971	2.53627	2.5777
2.49022	2.51174	2.53676	2.52461	2.53841	2.5748	2.47326	2.56254	2.55756	2.53119	2.54283	2.5614	2.48703	2.54973	2.55323	2.52577	2.54717	2.53678	2.56533	2.50332	2.53977	2.51839	2.54976	2.56178	2.57341	2.54238	2.55515	2.58122	2.57001	2.56712	2.5719	2.50785	2.51375	2.42986	2.48589	2.46255	2.51926	2.47631	2.52084	2.53599	2.50633	2.54465	2.54098	2.56296	2.55091	2.55497	2.5412	2.54089	2.50775	2.54087
2.51633	2.53274	2.56267	2.53089	2.56441	2.6158	2.48238	2.60433	2.5885	2.54177	2.5623	2.60738	2.49104	2.59936	2.58742	2.53513	2.58581	2.55616	2.59935	2.51562	2.53792	2.5391	2.58762	2.59461	2.5938	2.55908	2.57398	2.61072	2.60483	2.59039	2.60669	2.53135	2.52862	2.43472	2.49744	2.46799	2.54672	2.48407	2.53499	2.56151	2.52206	2.57413	2.56278	2.59061	2.57021	2.57317	2.55694	2.55837	2.52283	2.55581
2.51032	2.53283	2.5635	2.53883	2.56824	2.60875	2.48276	2.60417	2.59783	2.54432	2.56547	2.61177	2.48433	2.60648	2.58576	2.53453	2.58566	2.56077	2.60802	2.51986	2.54646	2.53144	2.58939	2.6054	2.60389	2.57263	2.58396	2.60856	2.61333	2.60252	2.6114	2.53668	2.53188	2.44047	2.48691	2.46503	2.54799	2.48453	2.53437	2.55657	2.51344	2.56853	2.56299	2.58945	2.56571	2.57714	2.56	2.56481	2.51888	2.55837
2.51336	2.52575	2.56584	2.5392	2.5607	2.61618	2.4872	2.58823	2.58366	2.54294	2.55526	2.60994	2.48964	2.5973	2.5829	2.54305	2.57324	2.56032	2.60138	2.51812	2.55111	2.53492	2.57965	2.59045	2.58759	2.55967	2.57193	2.59152	2.59358	2.588	2.5907	2.52799	2.53197	2.43613	2.49849	2.47537	2.5426	2.48499	2.53962	2.56633	2.52662	2.58023	2.56672	2.58563	2.56912	2.56978	2.5642	2.56378	2.5234	2.55887
2.52534	2.53126	2.57138	2.54531	2.57542	2.61593	2.48538	2.6096	2.59584	2.55254	2.57704	2.60484	2.49234	2.60533	2.59503	2.54412	2.58315	2.561	2.60917	2.51344	2.5545	2.53722	2.59654	2.60042	2.60342	2.56878	2.59101	2.60956	2.61368	2.60568	2.60826	2.54086	2.53951	2.43404	2.49854	2.47362	2.54839	2.48754	2.5377	2.56536	2.52358	2.57529	2.56605	2.58672	2.57274	2.57422	2.5629	2.56812	2.52907	2.55656
2.49418	2.51353	2.53503	2.52635	2.54857	2.57119	2.47618	2.56191	2.56185	2.53296	2.54196	2.55616	2.48448	2.56666	2.55604	2.52458	2.54593	2.54313	2.56074	2.50269	2.52943	2.5211	2.55781	2.56896	2.56525	2.53588	2.54607	2.55929	2.56873	2.5612	2.56427	2.51939	2.51374	2.43368	2.482	2.4641	2.52391	2.47742	2.51387	2.52972	2.50741	2.53993	2.53702	2.54561	2.54848	2.53963	2.5338	2.53238	2.50963	2.53292
2.52071	2.53074	2.56326	2.53929	2.57235	2.61276	2.48448	2.60149	2.59464	2.54704	2.55905	2.60846	2.49299	2.59843	2.5909	2.54033	2.58244	2.56543	2.60204	2.51638	2.55549	2.53785	2.5877	2.59982	2.59335	2.55954	2.57857	2.60058	2.601	2.58714	2.60388	2.53235	2.54113	2.43975	2.49978	2.47438	2.55435	2.4835	2.53917	2.57019	2.53658	2.58521	2.57758	2.59206	2.57585	2.57646	2.56929	2.56981	2.53184	2.55973
2.51941	2.53192	2.57316	2.54124	2.58052	2.63524	2.4788	2.61621	2.60721	2.5565	2.57469	2.63248	2.48846	2.62485	2.60077	2.54103	2.60507	2.56624	2.62971	2.51088	2.55476	2.53954	2.6035	2.61479	2.61606	2.57846	2.6018	2.62462	2.62659	2.61742	2.62434	2.54501	2.54376	2.43317	2.49385	2.46753	2.55675	2.4932	2.54085	2.574	2.51892	2.57674	2.57668	2.59807	2.58401	2.59378	2.57787	2.5749	2.52324	2.56989
2.48966	2.50549	2.5249	2.51357	2.5398	2.54521	2.46569	2.54073	2.54757	2.51676	2.52327	2.54058	2.47863	2.53672	2.53981	2.52012	2.53123	2.53738	2.53573	2.5003	2.51772	2.51047	2.54356	2.54655	2.53807	2.52458	2.52901	2.54337	2.54491	2.54486	2.537	2.51579	2.51634	2.43459	2.48299	2.47094	2.5253	2.4848	2.51707	2.52507	2.51571	2.53281	2.52987	2.53785	2.52819	2.53617	2.52658	2.52132	2.50413	2.52885
2.52374	2.5334	2.57147	2.54432	2.57355	2.61096	2.49332	2.60966	2.59331	2.55309	2.56386	2.60054	2.49218	2.60009	2.58935	2.54213	2.58634	2.55924	2.59527	2.51336	2.54915	2.53427	2.59452	2.59347	2.59713	2.56904	2.58308	2.60474	2.59486	2.59077	2.60514	2.538	2.53591	2.43879	2.4882	2.47517	2.5575	2.48836	2.53144	2.55849	2.53143	2.57866	2.56863	2.58946	2.57024	2.58351	2.56912	2.56847	2.53455	2.56187
2.52727	2.54188	2.59682	2.5606	2.59733	2.64321	2.49217	2.63859	2.62734	2.57712	2.59454	2.64182	2.49524	2.63565	2.61798	2.55822	2.61728	2.58284	2.64154	2.52175	2.57629	2.55353	2.6251	2.63521	2.63992	2.5949	2.61964	2.64263	2.64392	2.63265	2.64697	2.55004	2.54396	2.4363	2.49437	2.47701	2.56117	2.49094	2.54149	2.5772	2.53136	2.59574	2.58333	2.6137	2.59011	2.60508	2.58708	2.58689	2.54061	2.58553
2.52648	2.53108	2.5888	2.55154	2.58652	2.62542	2.49357	2.61367	2.60274	2.56177	2.57238	2.61306	2.49237	2.62347	2.59028	2.54554	2.60989	2.564	2.61327	2.51857	2.54907	2.53696	2.6052	2.61695	2.61712	2.57798	2.60396	2.62027	2.62267	2.61399	2.62009	2.52942	2.53368	2.43589	2.494	2.47482	2.54861	2.48773	2.53514	2.56856	2.52455	2.57851	2.56279	2.59044	2.5706	2.59579	2.5731	2.5713	2.53271	2.57635
2.51525	2.5124	2.58377	2.54136	2.57452	2.62982	2.47797	2.61106	2.60271	2.55589	2.57323	2.61415	2.48546	2.61064	2.59237	2.53846	2.59277	2.55235	2.60803	2.49613	2.5465	2.53376	2.59948	2.6061	2.60865	2.58105	2.59226	2.62019	2.62214	2.60985	2.6202	2.54024	2.53943	2.43336	2.49406	2.46392	2.55036	2.48307	2.53876	2.55957	2.51571	2.57911	2.57918	2.59791	2.57624	2.57905	2.57842	2.57225	2.52121	2.57132
2.51615	2.53252	2.58175	2.54103	2.57475	2.64173	2.48524	2.6256	2.60751	2.55597	2.57319	2.63233	2.483	2.62479	2.59927	2.53539	2.61017	2.56169	2.62975	2.52138	2.54494	2.5302	2.61154	2.62196	2.60957	2.57197	2.60002	2.62648	2.62474	2.60698	2.63782	2.53135	2.53653	2.43618	2.48874	2.46342	2.55127	2.48682	2.53112	2.56223	2.5199	2.57416	2.57574	2.6053	2.58445	2.58547	2.57985	2.57027	2.53066	2.567
2.51976	2.53041	2.56925	2.53764	2.57392	2.62603	2.49017	2.61175	2.60048	2.55385	2.56668	2.61912	2.4898	2.60647	2.59636	2.54004	2.58739	2.56389	2.6091	2.51405	2.54978	2.53614	2.59771	2.60979	2.60621	2.56312	2.58974	2.616	2.60985	2.59594	2.61061	2.53734	2.53603	2.43525	2.49186	2.46713	2.55461	2.48065	2.53442	2.56472	2.51798	2.58085	2.5712	2.59361	2.57177	2.58331	2.57379	2.56381	2.52917	2.56585
2.51294	2.52278	2.57837	2.54106	2.57955	2.6366	2.48501	2.6192	2.61195	2.55238	2.57336	2.6243	2.49336	2.62217	2.60224	2.54135	2.60113	2.57013	2.62279	2.51202	2.5595	2.53429	2.60388	2.61045	2.60994	2.56572	2.59947	2.61906	2.61678	2.60812	2.6261	2.53797	2.53306	2.43298	2.49619	2.47073	2.54956	2.48587	2.53694	2.5673	2.52414	2.57747	2.58166	2.59986	2.58427	2.58389	2.57521	2.57778	2.538	2.57322
2.53034	2.54525	2.58558	2.55367	2.59099	2.63938	2.48673	2.62011	2.61412	2.56549	2.57871	2.63419	2.4879	2.62717	2.61103	2.55033	2.60385	2.582	2.62883	2.52518	2.56492	2.53877	2.60922	2.62165	2.61657	2.57629	2.5993	2.63075	2.62754	2.61092	2.63665	2.5423	2.54715	2.43804	2.49564	2.4729	2.56871	2.4925	2.54986	2.57378	2.52914	2.5978	2.57965	2.6039	2.58774	2.59812	2.58754	2.58452	2.52895	2.58255
2.50759	2.52158	2.57326	2.54309	2.57291	2.63468	2.48884	2.60824	2.60362	2.55745	2.58192	2.62582	2.4845	2.61122	2.59961	2.54188	2.59465	2.56642	2.62494	2.5153	2.55915	2.53401	2.6038	2.61353	2.61006	2.57406	2.6018	2.62714	2.62748	2.60461	2.63083	2.54239	2.53632	2.43291	2.49567	2.462	2.55697	2.48877	2.53783	2.56869	2.52088	2.57954	2.57253	2.59837	2.58146	2.58615	2.57189	2.57583	2.52077	2.57431
2.50757	2.51864	2.56134	2.52725	2.56181	2.62745	2.48331	2.60237	2.60699	2.54471	2.56295	2.62066	2.48287	2.60176	2.59743	2.53083	2.58278	2.55856	2.61528	2.49908	2.54645	2.52543	2.59078	2.60509	2.60427	2.5651	2.59111	2.61815	2.61664	2.60229	2.6267	2.53395	2.53323	2.43213	2.49272	2.46018	2.54944	2.48314	2.53357	2.56102	2.51153	2.57812	2.56804	2.59338	2.57774	2.57673	2.56555	2.56943	2.52663	2.565
2.51906	2.52788	2.56866	2.5397	2.56583	2.61468	2.48921	2.6204	2.59241	2.54405	2.56315	2.60811	2.48411	2.60799	2.5907	2.52949	2.59056	2.55608	2.60994	2.51374	2.54243	2.52436	2.59901	2.60714	2.60005	2.55352	2.59573	2.61238	2.60597	2.58789	2.60861	2.52451	2.5273	2.43367	2.48761	2.46996	2.5425	2.48237	2.52976	2.56178	2.52316	2.57905	2.57047	2.59231	2.57707	2.591	2.57642	2.5626	2.53674	2.5666
2.51606	2.52216	2.56394	2.53649	2.56613	2.60171	2.48771	2.58702	2.58292	2.54908	2.56186	2.59601	2.49189	2.58796	2.58324	2.53967	2.56987	2.55884	2.6006	2.51391	2.55193	2.53139	2.57788	2.5978	2.58959	2.55645	2.57161	2.59542	2.59794	2.58234	2.5926	2.52373	2.53416	2.43335	2.48967	2.47218	2.5411	2.48211	2.53602	2.55873	2.51785	2.57429	2.55833	2.57467	2.5591	2.57119	2.55034	2.55834	2.52534	2.55702
2.48474	2.4846	2.52646	2.50635	2.53245	2.55632	2.45585	2.55209	2.54786	2.51685	2.52369	2.5569	2.46622	2.54243	2.53699	2.5055	2.53277	2.52109	2.54362	2.44925	2.5182	2.49602	2.54142	2.54288	2.54331	2.51058	2.53243	2.55681	2.54769	2.54419	2.55368	2.5153	2.50833	2.43409	2.47079	2.46434	2.51515	2.47125	2.50839	2.52521	2.49685	2.5306	2.52545	2.53865	2.53114	2.53202	2.53119	2.52835	2.49919	2.525
2.50786	2.49951	2.56181	2.52324	2.55799	2.58908	2.44816	2.58367	2.56888	2.54109	2.53964	2.59681	2.4826	2.57783	2.56787	2.5298	2.57275	2.54592	2.57845	2.47828	2.54182	2.52659	2.57643	2.57374	2.57848	2.54613	2.56495	2.59954	2.58199	2.57687	2.60019	2.54556	2.54912	2.4384	2.49519	2.48049	2.55326	2.49051	2.53593	2.55033	2.51943	2.56564	2.55448	2.57694	2.56106	2.56657	2.55794	2.5549	2.51577	2.56084
2.51212	2.52138	2.56342	2.53297	2.56242	2.60374	2.47676	2.59149	2.59365	2.54546	2.56483	2.61531	2.48939	2.59849	2.59168	2.53254	2.58494	2.56388	2.60676	2.50246	2.54857	2.5265	2.57922	2.5949	2.59092	2.55897	2.57917	2.60832	2.60006	2.58857	2.60169	2.5352	2.53428	2.43294	2.48509	2.46853	2.54729	2.48151	2.52998	2.55576	2.51697	2.56587	2.5629	2.58326	2.56837	2.5771	2.56198	2.56461	2.52633	2.55589
2.47212	2.47922	2.4955	2.48862	2.50296	2.50991	2.46082	2.50233	2.50591	2.49071	2.49554	2.51855	2.4572	2.50359	2.51019	2.49096	2.49811	2.50376	2.52029	2.47499	2.49669	2.48661	2.50404	2.5102	2.51403	2.49822	2.50043	2.51645	2.51292	2.51508	2.50564	2.48947	2.48046	2.42464	2.46009	2.45404	2.49468	2.45518	2.48798	2.49919	2.4802	2.50213	2.49362	2.50683	2.49289	2.50436	2.49783	2.4971	2.48424	2.50306
2.51637	2.52448	2.56738	2.55276	2.57904	2.59554	2.4869	2.58879	2.58579	2.56096	2.56564	2.59856	2.49106	2.59094	2.57246	2.55127	2.58686	2.56468	2.60191	2.51565	2.56325	2.54923	2.59349	2.59364	2.60244	2.57266	2.58192	2.60702	2.60744	2.59959	2.59423	2.53927	2.53526	2.44329	2.48973	2.479	2.54716	2.49537	2.54099	2.55616	2.52553	2.56064	2.55492	2.57075	2.5574	2.56259	2.54995	2.55344	2.52153	2.56793
2.51976	2.52904	2.59102	2.55101	2.58207	2.63719	2.48464	2.61584	2.6119	2.56331	2.57893	2.6323	2.49432	2.6257	2.60516	2.54897	2.60189	2.56967	2.62759	2.52557	2.55927	2.54383	2.60491	2.61811	2.62539	2.5851	2.60544	2.62799	2.6279	2.61616	2.63134	2.53348	2.53601	2.43641	2.48268	2.47399	2.55334	2.48739	2.54223	2.5694	2.52037	2.5778	2.57265	2.59898	2.57219	2.58659	2.57394	2.56979	2.5222	2.55812
2.50002	2.52003	2.54534	2.52324	2.54027	2.58732	2.47325	2.57395	2.57532	2.52775	2.54368	2.58948	2.47837	2.57293	2.56427	2.52346	2.55263	2.54311	2.58233	2.49989	2.5342	2.51846	2.56317	2.57282	2.57176	2.54022	2.55753	2.58223	2.56858	2.57037	2.58183	2.50427	2.50413	2.4258	2.4789	2.45884	2.51816	2.47181	2.52015	2.53432	2.50202	2.5411	2.54076	2.55877	2.54875	2.55402	2.54508	2.54295	2.50527	2.54077
2.48732	2.49454	2.51904	2.50155	2.5216	2.54555	2.46063	2.5492	2.53742	2.50773	2.51987	2.5545	2.47692	2.53973	2.54466	2.50736	2.52513	2.52809	2.54513	2.49097	2.52175	2.49985	2.53502	2.53519	2.536	2.52381	2.5257	2.54648	2.53458	2.53542	2.54642	2.49731	2.49503	2.42416	2.47251	2.46061	2.5096	2.46633	2.50418	2.5185	2.49016	2.52268	2.5222	2.54366	2.52645	2.52944	2.53361	2.52689	2.49003	2.52072
2.45847	2.47303	2.46637	2.46705	2.46737	2.4877	2.44017	2.48394	2.4783	2.45951	2.4647	2.48813	2.44485	2.47747	2.48405	2.45864	2.47705	2.47408	2.48415	2.45164	2.46421	2.45436	2.47961	2.4837	2.47565	2.46946	2.46758	2.48415	2.47991	2.48028	2.48669	2.46536	2.46017	2.41792	2.45785	2.44032	2.46812	2.44456	2.46242	2.47775	2.4622	2.47955	2.48147	2.48355	2.48402	2.46899	2.47489	2.47932	2.45791	2.47749
2.50546	2.51762	2.56302	2.54058	2.5707	2.62049	2.47742	2.59522	2.59782	2.54962	2.57257	2.62351	2.48684	2.60197	2.60006	2.54308	2.57693	2.57385	2.61183	2.5191	2.56144	2.53663	2.58474	2.60961	2.61127	2.57632	2.58388	2.60907	2.61309	2.60675	2.61151	2.52593	2.51956	2.43097	2.47793	2.46613	2.54077	2.47628	2.52718	2.54744	2.51323	2.56554	2.54968	2.57612	2.5595	2.56869	2.5475	2.55238	2.51238	2.54987
2.50771	2.52603	2.56488	2.53236	2.5607	2.60356	2.48716	2.5922	2.58671	2.54124	2.55844	2.60148	2.4901	2.5972	2.58128	2.53954	2.5862	2.55745	2.60237	2.51158	2.55188	2.53097	2.58497	2.58881	2.59556	2.56099	2.57903	2.59756	2.58911	2.5836	2.60033	2.53719	2.53433	2.44058	2.48767	2.47382	2.54363	2.48519	2.53667	2.55223	2.51949	2.56678	2.56118	2.58206	2.56816	2.5689	2.56433	2.56059	2.52465	2.5589
2.43025	2.44911	2.46611	2.46828	2.49731	2.50287	2.43314	2.4904	2.50013	2.48407	2.48595	2.51548	2.44082	2.50043	2.50833	2.48151	2.48715	2.50821	2.50075	2.46283	2.507	2.48127	2.492	2.51425	2.51734	2.49785	2.49788	2.50405	2.51357	2.51784	2.49208	2.48464	2.49048	2.41758	2.45153	2.44296	2.49444	2.45299	2.48059	2.50296	2.4721	2.51141	2.49771	2.5135	2.50171	2.50864	2.50441	2.50121	2.47166	2.50632
2.45106	2.43013	2.49715	2.46448	2.50313	2.52803	2.42716	2.52078	2.51042	2.49714	2.49855	2.52872	2.44994	2.51671	2.51783	2.48685	2.50984	2.50453	2.5224	2.45453	2.50273	2.49529	2.5097	2.52334	2.52408	2.5009	2.5068	2.50566	2.52728	2.51709	2.51287	2.49382	2.49798	2.42579	2.46784	2.45467	2.49985	2.46153	2.49319	2.52055	2.48007	2.52824	2.51537	2.52601	2.51489	2.50982	2.51521	2.51678	2.48791	2.51606
2.46828	2.50738	2.49064	2.52412	2.52184	2.5431	2.47393	2.51412	2.55057	2.51229	2.53294	2.58045	2.47295	2.54015	2.56311	2.52639	2.5223	2.56964	2.55694	2.49684	2.55884	2.52887	2.53401	2.55712	2.57119	2.54594	2.52204	2.55436	2.56357	2.55912	2.53762	2.51326	2.52288	2.4338	2.47023	2.46363	2.5295	2.47081	2.5141	2.54278	2.49543	2.5463	2.53924	2.5607	2.54108	2.55498	2.54886	2.54059	2.49996	2.54464
2.49377	2.52267	2.53078	2.56329	2.5823	2.55862	2.48601	2.57339	2.58733	2.5661	2.58044	2.64555	2.48528	2.59191	2.6108	2.55888	2.58615	2.58962	2.6046	2.52239	2.58615	2.55628	2.58813	2.61985	2.63242	2.6001	2.58533	2.60632	2.62814	2.61296	2.61628	2.54123	2.55053	2.4388	2.48831	2.4717	2.56036	2.48754	2.53984	2.57622	2.51595	2.57846	2.58705	2.61199	2.59157	2.59753	2.58665	2.5798	2.5179	2.57706
2.46422	2.48337	2.50952	2.44886	2.49331	2.5583	2.46144	2.52741	2.54313	2.49024	2.50463	2.56563	2.4478	2.54776	2.55689	2.51865	2.53511	2.54861	2.55255	2.48101	2.5473	2.51411	2.52745	2.54609	2.5385	2.52173	2.51323	2.54002	2.55093	2.54669	2.5365	2.51391	2.51768	2.43418	2.47747	2.46588	2.52082	2.47244	2.51243	2.54625	2.50233	2.5449	2.54152	2.55669	2.53611	2.55542	2.54204	2.53865	2.49751	2.53769
2.49339	2.51009	2.52233	2.50641	2.50709	2.58568	2.48148	2.56466	2.57262	2.53099	2.53486	2.62008	2.48158	2.59122	2.60015	2.55284	2.56999	2.58737	2.59607	2.51228	2.60014	2.5506	2.57076	2.59603	2.59801	2.5689	2.54671	2.58212	2.60013	2.58575	2.57711	2.53344	2.53546	2.44079	2.47414	2.46816	2.54876	2.48332	2.53331	2.56482	2.5177	2.57784	2.57165	2.5813	2.56757	2.58127	2.57227	2.56766	2.51182	2.57769
2.42483	2.43211	2.45451	2.43912	2.44873	2.46032	2.41075	2.46205	2.45933	2.44388	2.45024	2.46502	2.4274	2.46081	2.45641	2.44791	2.45802	2.45821	2.45928	2.42965	2.45124	2.44069	2.45635	2.46098	2.45989	2.44057	2.45387	2.4529	2.45842	2.45399	2.45552	2.45541	2.44919	2.40824	2.42696	2.43153	2.45735	2.42868	2.45588	2.47016	2.44721	2.46246	2.45876	2.46648	2.45718	2.46089	2.46009	2.45994	2.44135	2.45993
2.50968	2.51873	2.54763	2.54251	2.56836	2.57286	2.48107	2.58949	2.55347	2.55525	2.56337	2.6058	2.47835	2.57176	2.58276	2.54547	2.58102	2.56978	2.58866	2.51221	2.57651	2.54758	2.5889	2.60928	2.61003	2.57943	2.58654	2.59596	2.62051	2.59499	2.60432	2.53281	2.53001	2.44133	2.4883	2.47422	2.54633	2.48361	2.53727	2.56934	2.52172	2.57877	2.57567	2.59594	2.57795	2.58029	2.57602	2.56847	2.52376	2.57119
2.49611	2.52771	2.56102	2.54388	2.58058	2.59862	2.48434	2.56345	2.59652	2.56232	2.57819	2.64031	2.48664	2.59416	2.62043	2.5563	2.58559	2.58835	2.61401	2.52469	2.58098	2.55789	2.59678	2.62836	2.63576	2.60016	2.59185	2.61963	2.63503	2.62743	2.62205	2.54574	2.55599	2.4376	2.4945	2.46882	2.56932	2.48952	2.54792	2.57797	2.52223	2.59196	2.58501	2.62301	2.58914	2.60158	2.59691	2.58455	2.53162	2.57464
2.49649	2.52148	2.56712	2.54381	2.583	2.57077	2.47838	2.59001	2.58128	2.56439	2.58315	2.60762	2.48267	2.54943	2.61551	2.55224	2.57944	2.57869	2.58447	2.51648	2.56787	2.54627	2.58776	2.62681	2.62663	2.58378	2.60054	2.60291	2.62647	2.61131	2.62507	2.53415	2.5371	2.42913	2.49253	2.46874	2.55553	2.48644	2.53261	2.56713	2.51833	2.58353	2.57847	2.59785	2.58337	2.58309	2.57768	2.57264	2.525	2.5732
2.49967	2.50546	2.53695	2.50217	2.52339	2.57301	2.47549	2.5646	2.56414	2.50142	2.48917	2.59562	2.46143	2.57719	2.58247	2.5256	2.5691	2.56888	2.58437	2.50396	2.56694	2.52033	2.56055	2.56534	2.54831	2.53275	2.55014	2.56978	2.56303	2.54523	2.56793	2.52157	2.52827	2.43952	2.47933	2.46217	2.54091	2.48388	2.52493	2.55393	2.51382	2.55968	2.55366	2.55909	2.54981	2.57367	2.55951	2.55471	2.50981	2.57141
2.48631	2.50149	2.54341	2.49275	2.52778	2.56642	2.46734	2.56022	2.56786	2.46439	2.4986	2.58102	2.44522	2.56467	2.55305	2.49488	2.56733	2.55083	2.56453	2.48789	2.54096	2.49078	2.5463	2.55918	2.54898	2.51186	2.55081	2.55633	2.55177	2.53911	2.56435	2.52636	2.5294	2.44224	2.47561	2.46858	2.52793	2.48341	2.52242	2.54484	2.50746	2.54926	2.54058	2.54854	2.5392	2.56411	2.54631	2.54337	2.49548	2.5472
2.51039	2.52106	2.5847	2.55579	2.60097	2.60491	2.48025	2.61677	2.60256	2.57	2.58632	2.57313	2.4942	2.6084	2.60873	2.5594	2.6025	2.59221	2.60991	2.51676	2.58027	2.55901	2.61396	2.64115	2.62961	2.58644	2.61738	2.62679	2.64608	2.61635	2.63421	2.53447	2.54384	2.43614	2.49457	2.47361	2.55131	2.48454	2.54192	2.5696	2.52072	2.5877	2.58066	2.60788	2.58532	2.58788	2.58136	2.58144	2.52667	2.578
2.46941	2.47813	2.48411	2.47229	2.48606	2.50239	2.44363	2.4962	2.50249	2.45563	2.47055	2.51655	2.42232	2.50419	2.50857	2.43758	2.50412	2.497	2.50999	2.45602	2.47995	2.44641	2.49118	2.49843	2.48213	2.47009	2.49354	2.49402	2.48272	2.47829	2.50457	2.49186	2.4967	2.42958	2.4553	2.44559	2.49042	2.4592	2.48072	2.50477	2.47226	2.50577	2.49577	2.50768	2.49469	2.50861	2.49947	2.49906	2.47401	2.51197
2.52752	2.51633	2.5708	2.57987	2.61358	2.59139	2.48186	2.59686	2.57807	2.58894	2.57774	2.63052	2.49327	2.60135	2.58545	2.57227	2.60706	2.56855	2.62081	2.51544	2.58813	2.56709	2.6146	2.60848	2.6267	2.60241	2.62167	2.60557	2.63515	2.60468	2.60036	2.55177	2.55898	2.44466	2.49209	2.48178	2.57715	2.49676	2.54194	2.57425	2.53199	2.59194	2.57484	2.59207	2.57247	2.59443	2.57883	2.5851	2.52807	2.58907
2.50238	2.52976	2.5631	2.54981	2.5724	2.58524	2.48533	2.58643	2.58826	2.54857	2.57169	2.61362	2.48707	2.58803	2.59701	2.55488	2.57345	2.59379	2.59839	2.51678	2.589	2.55598	2.59314	2.6206	2.63798	2.59626	2.59549	2.61244	2.62905	2.61396	2.63435	2.53458	2.53832	2.43628	2.4846	2.45397	2.5517	2.4772	2.53282	2.56405	2.50427	2.57161	2.56501	2.59003	2.57285	2.5853	2.57855	2.56974	2.52099	2.56441
2.47232	2.45651	2.49704	2.4859	2.50555	2.5211	2.42344	2.52197	2.51597	2.50153	2.49885	2.52745	2.43599	2.512	2.51684	2.46584	2.51338	2.50422	2.51246	2.43257	2.5041	2.46613	2.50349	2.51628	2.51198	2.48285	2.51165	2.51306	2.51843	2.51206	2.51573	2.49702	2.49444	2.42179	2.46779	2.45072	2.49755	2.46389	2.4967	2.50957	2.47353	2.51545	2.50827	2.51788	2.504	2.50398	2.51427	2.50914	2.48094	2.52405
2.51264	2.52822	2.57219	2.55876	2.60485	2.58459	2.48499	2.61452	2.59025	2.57222	2.59353	2.60459	2.49412	2.58858	2.62825	2.56453	2.61755	2.6087	2.61447	2.52881	2.58366	2.55345	2.61379	2.66246	2.65976	2.59459	2.61733	2.62066	2.65566	2.63636	2.65324	2.5344	2.54827	2.43229	2.49017	2.468	2.56515	2.48466	2.5334	2.56605	2.52155	2.58092	2.57685	2.60973	2.58192	2.59267	2.57993	2.57614	2.52308	2.5732
2.51763	2.51566	2.57197	2.55833	2.59751	2.5826	2.47943	2.58331	2.57741	2.54212	2.53571	2.60412	2.46767	2.57888	2.58382	2.52653	2.59635	2.54186	2.58706	2.49933	2.48607	2.53412	2.58871	2.58574	2.59156	2.57762	2.6046	2.58824	2.60413	2.58911	2.59682	2.54419	2.56436	2.45619	2.5013	2.49027	2.55817	2.50105	2.54563	2.56712	2.52746	2.56878	2.5595	2.57872	2.56423	2.59305	2.5724	2.57525	2.52878	2.58509
2.49912	2.50672	2.54181	2.52255	2.54359	2.55936	2.46436	2.55773	2.55682	2.5022	2.50387	2.58433	2.44265	2.55517	2.55702	2.46437	2.56487	2.53287	2.56268	2.48184	2.50356	2.4653	2.54605	2.54219	2.52674	2.51576	2.55051	2.56005	2.54715	2.53592	2.56387	2.53276	2.54832	2.4441	2.48401	2.47886	2.53977	2.49017	2.53211	2.55589	2.50497	2.55879	2.55457	2.5621	2.55214	2.57642	2.56871	2.56089	2.5107	2.56668
2.50274	2.52048	2.56473	2.54673	2.59097	2.59966	2.47496	2.60623	2.58586	2.5604	2.5825	2.61054	2.48771	2.61203	2.61787	2.55292	2.59998	2.59661	2.61677	2.51275	2.56641	2.53685	2.59373	2.64119	2.62912	2.57653	2.59742	2.6124	2.63511	2.6027	2.62335	2.53135	2.53663	2.43126	2.47796	2.46448	2.55176	2.47479	2.52886	2.55526	2.51073	2.57297	2.56537	2.59742	2.5693	2.57568	2.57165	2.56989	2.5196	2.57145
2.49776	2.51768	2.54523	2.54519	2.57106	2.59122	2.47976	2.58927	2.57937	2.55449	2.57683	2.62401	2.48501	2.59412	2.61898	2.55358	2.59561	2.60212	2.6007	2.52373	2.60426	2.55729	2.59581	2.6296	2.6485	2.59879	2.59675	2.6056	2.64534	2.63244	2.6255	2.53852	2.54397	2.43674	2.48771	2.46313	2.56024	2.48972	2.53634	2.5719	2.51689	2.57379	2.58002	2.59899	2.58218	2.58744	2.58959	2.57559	2.51942	2.5748
2.52033	2.51737	2.56578	2.5452	2.58283	2.61405	2.48363	2.61049	2.59135	2.55995	2.56812	2.63611	2.47705	2.61805	2.61875	2.54533	2.6065	2.58913	2.63468	2.52352	2.57659	2.53828	2.60276	2.58297	2.59351	2.57652	2.60013	2.61272	2.59901	2.57691	2.62484	2.53802	2.54819	2.4399	2.49101	2.47084	2.56869	2.49319	2.54012	2.56449	2.51975	2.57808	2.58128	2.59783	2.58099	2.59371	2.58438	2.57563	2.51774	2.58772
2.49948	2.51109	2.56271	2.51649	2.55319	2.58	2.46896	2.58021	2.57399	2.50485	2.52037	2.59145	2.45017	2.57293	2.57527	2.52781	2.57636	2.57422	2.57593	2.49145	2.5846	2.52235	2.56821	2.58085	2.57693	2.50415	2.567	2.57519	2.58771	2.5641	2.582	2.5329	2.54882	2.4461	2.48433	2.47357	2.54816	2.49356	2.53006	2.5592	2.51596	2.56697	2.55814	2.56724	2.55327	2.57466	2.57358	2.56514	2.50348	2.57074
2.51066	2.51803	2.58362	2.53834	2.57569	2.6103	2.47278	2.60918	2.59196	2.52104	2.53338	2.61463	2.45933	2.60996	2.58777	2.52377	2.60598	2.55812	2.59741	2.50614	2.56116	2.53094	2.5992	2.58681	2.53746	2.56368	2.60196	2.59658	2.59298	2.56336	2.61152	2.53465	2.53769	2.44303	2.48337	2.47758	2.55303	2.48746	2.53041	2.55761	2.51588	2.57293	2.56776	2.5867	2.56643	2.59584	2.5706	2.56821	2.52012	2.58579
2.50808	2.51915	2.56277	2.54148	2.55787	2.59811	2.48695	2.60246	2.59382	2.55859	2.56514	2.64878	2.48492	2.61833	2.62933	2.55213	2.60849	2.60569	2.61833	2.52439	2.5926	2.55124	2.60854	2.62174	2.62187	2.58803	2.5823	2.61024	2.60685	2.60192	2.62835	2.53579	2.5406	2.43173	2.4881	2.46375	2.56568	2.48342	2.53906	2.57373	2.51852	2.58439	2.58823	2.60781	2.58477	2.59606	2.58854	2.57542	2.51913	2.57981
2.48611	2.50978	2.55438	2.52849	2.55596	2.60112	2.46687	2.59928	2.57184	2.55451	2.56734	2.63446	2.47565	2.60891	2.62054	2.54453	2.61712	2.58665	2.60231	2.51847	2.5814	2.5449	2.58708	2.6211	2.63054	2.59969	2.56826	2.55711	2.63951	2.61484	2.61216	2.53644	2.53786	2.4368	2.48758	2.46609	2.55331	2.48349	2.52915	2.56908	2.51809	2.57363	2.58049	2.60746	2.58448	2.59208	2.58351	2.57688	2.5253	2.57128
2.51394	2.52921	2.5869	2.5433	2.57728	2.60449	2.47105	2.60995	2.59571	2.52395	2.5504	2.61726	2.45444	2.61653	2.59641	2.54467	2.61643	2.5917	2.60389	2.51085	2.59593	2.54366	2.60555	2.60409	2.57791	2.55558	2.60038	2.59921	2.60584	2.55919	2.61435	2.54061	2.54646	2.45183	2.48473	2.47849	2.55845	2.49014	2.5331	2.56253	2.52359	2.5848	2.57173	2.59113	2.56634	2.59123	2.57619	2.57053	2.5157	2.58392
2.51441	2.52445	2.58256	2.54219	2.58693	2.63454	2.47943	2.6349	2.61337	2.55485	2.57225	2.65464	2.46861	2.64959	2.62832	2.54728	2.63109	2.59007	2.6297	2.52712	2.59854	2.54861	2.61616	2.6102	2.59335	2.59761	2.61555	2.62929	2.58109	2.57137	2.63813	2.54157	2.54484	2.43914	2.48861	2.46698	2.56869	2.49172	2.53951	2.57464	2.5193	2.58851	2.5941	2.61506	2.5885	2.60275	2.58916	2.58728	2.52268	2.58354
2.49072	2.51413	2.55214	2.52697	2.54672	2.59034	2.47475	2.57808	2.57707	2.54381	2.56602	2.61323	2.47107	2.59993	2.59752	2.53732	2.59911	2.57934	2.59375	2.51576	2.58997	2.54378	2.58147	2.60094	2.61594	2.58741	2.5585	2.58816	2.62474	2.60469	2.58724	2.52814	2.53556	2.4352	2.4874	2.46438	2.54902	2.48298	2.53293	2.55961	2.50994	2.56922	2.57277	2.59697	2.57776	2.58288	2.57914	2.57199	2.51113	2.56315
2.50253	2.51649	2.54475	2.5306	2.5437	2.56852	2.47941	2.55447	2.5501	2.53365	2.54543	2.56076	2.49455	2.55594	2.55019	2.55015	2.54247	2.55838	2.56314	2.50967	2.55928	2.54298	2.55488	2.57058	2.56638	2.55102	2.54651	2.56249	2.56094	2.5607	2.56872	2.47947	2.52201	2.43327	2.47546	2.47462	2.53181	2.48563	2.5127	2.52725	2.51635	2.55173	2.53735	2.55481	2.54369	2.54958	2.54224	2.53741	2.50017	2.52441
2.51096	2.51879	2.56701	2.54646	2.57149	2.58599	2.47856	2.5896	2.57706	2.55565	2.55701	2.58691	2.49917	2.58269	2.58197	2.55945	2.57757	2.5812	2.58769	2.51948	2.584	2.56502	2.58558	2.59824	2.59973	2.57745	2.57482	2.59321	2.60433	2.5951	2.59714	2.52403	2.53394	2.44045	2.48563	2.47382	2.55224	2.48938	2.53184	2.55906	2.52563	2.57793	2.5585	2.58065	2.56225	2.5782	2.55968	2.55984	2.50851	2.55837
2.47811	2.49917	2.517	2.50785	2.52995	2.537	2.45275	2.52913	2.52907	2.51302	2.52183	2.53955	2.47232	2.5239	2.52617	2.52769	2.53081	2.54843	2.52761	2.49291	2.54299	2.53337	2.53534	2.5409	2.54904	2.53076	2.52755	2.53382	2.53158	2.54185	2.54268	2.49067	2.51557	2.418	2.46374	2.45442	2.53482	2.46128	2.49895	2.51307	2.50641	2.53612	2.51626	2.52482	2.52277	2.5242	2.51919	2.51313	2.4858	2.52215
2.44299	2.46028	2.46577	2.45956	2.46493	2.48186	2.42929	2.47226	2.47764	2.4596	2.46905	2.48824	2.43452	2.46998	2.4711	2.46981	2.47435	2.47679	2.47393	2.44809	2.47878	2.46544	2.47678	2.47997	2.48438	2.47001	2.46953	2.47417	2.47627	2.48424	2.489	2.45478	2.45739	2.41078	2.43671	2.42553	2.46636	2.4338	2.46161	2.47142	2.44876	2.47926	2.47369	2.48184	2.47992	2.46883	2.47666	2.48041	2.45635	2.46985
2.44403	2.46234	2.45865	2.45711	2.45855	2.47956	2.43686	2.46892	2.46938	2.46263	2.45651	2.4775	2.43748	2.46771	2.47756	2.46506	2.45963	2.47316	2.4707	2.45151	2.47261	2.46313	2.4694	2.47461	2.47842	2.46323	2.46353	2.47144	2.4696	2.47615	2.47683	2.44415	2.44893	2.40364	2.41007	2.43627	2.44976	2.42583	2.43081	2.45033	2.44563	2.4665	2.43927	2.44106	2.44161	2.45528	2.44005	2.4392	2.43723	2.45362
2.44355	2.44633	2.45784	2.45501	2.45429	2.46918	2.43581	2.45578	2.45752	2.44948	2.45891	2.465	2.43685	2.45628	2.45739	2.46547	2.45983	2.47478	2.44985	2.44246	2.46946	2.46139	2.4645	2.46068	2.46818	2.46279	2.45811	2.46271	2.46561	2.47365	2.46538	2.45147	2.45881	2.40537	2.42765	2.40888	2.45024	2.43317	2.43523	2.45721	2.43654	2.45966	2.45455	2.44921	2.45296	2.44917	2.45406	2.44266	2.43489	2.45811
2.48213	2.503	2.52135	2.51348	2.53143	2.54451	2.46764	2.53729	2.53059	2.52272	2.52608	2.54481	2.47233	2.54027	2.52916	2.53416	2.53547	2.54771	2.53877	2.49435	2.55357	2.52959	2.53701	2.54995	2.55631	2.54111	2.52878	2.53757	2.54597	2.54953	2.55113	2.49268	2.4897	2.42188	2.46952	2.46002	2.51944	2.44702	2.49061	2.52018	2.49751	2.53871	2.51354	2.52398	2.52198	2.5234	2.52065	2.51315	2.48118	2.51947
2.50409	2.50833	2.54893	2.5305	2.55569	2.57195	2.47432	2.56846	2.56233	2.54206	2.5414	2.57061	2.4868	2.5656	2.5553	2.54464	2.56442	2.56304	2.55922	2.50425	2.56243	2.54471	2.56946	2.56822	2.58436	2.5662	2.55854	2.57355	2.58867	2.57627	2.58277	2.51509	2.52795	2.4371	2.47395	2.45833	2.53256	2.47314	2.5067	2.53927	2.50828	2.55734	2.52955	2.54774	2.53071	2.54823	2.53879	2.53126	2.4966	2.54197
2.46963	2.47969	2.49756	2.47917	2.49082	2.50348	2.45091	2.50346	2.50393	2.48531	2.49353	2.50595	2.45645	2.49228	2.50029	2.49147	2.48692	2.50933	2.49626	2.45904	2.50304	2.4855	2.49726	2.50152	2.50307	2.48789	2.49371	2.50446	2.49423	2.50434	2.506	2.47649	2.48067	2.41536	2.43692	2.42869	2.48411	2.45051	2.45672	2.47983	2.47102	2.49994	2.47453	2.48534	2.48124	2.49282	2.4898	2.48077	2.46073	2.47575
2.4566	2.46662	2.48611	2.48604	2.48689	2.50366	2.44177	2.48888	2.4985	2.48548	2.48384	2.4884	2.45736	2.48599	2.48147	2.49391	2.4919	2.50541	2.48511	2.46131	2.51087	2.50092	2.49182	2.49873	2.50012	2.49283	2.48873	2.49804	2.49705	2.50638	2.50347	2.47482	2.48785	2.41298	2.44927	2.43004	2.48504	2.44149	2.47244	2.48987	2.45842	2.50175	2.48349	2.488	2.47897	2.47644	2.48793	2.47375	2.44135	2.47764
2.48756	2.51789	2.52761	2.52271	2.52718	2.54228	2.46559	2.54091	2.53709	2.52076	2.52065	2.53907	2.47839	2.53024	2.53131	2.52528	2.53025	2.5337	2.53629	2.49753	2.5378	2.52523	2.53914	2.5431	2.54413	2.526	2.52545	2.54505	2.53472	2.54048	2.54001	2.49219	2.49623	2.42299	2.45131	2.45477	2.51193	2.45751	2.45633	2.5011	2.49485	2.52524	2.51753	2.53094	2.51332	2.53044	2.52528	2.50781	2.49229	2.52179
2.51079	2.52222	2.55252	2.53353	2.54966	2.57146	2.47705	2.56555	2.56144	2.54396	2.54938	2.56428	2.49478	2.55242	2.56056	2.55642	2.55733	2.56353	2.55651	2.50671	2.56534	2.54941	2.56531	2.56843	2.56943	2.55629	2.55105	2.5672	2.56313	2.57086	2.57059	2.52814	2.53565	2.4474	2.47976	2.48671	2.55218	2.49357	2.50987	2.51045	2.52196	2.54785	2.55963	2.57666	2.56799	2.55957	2.56484	2.55952	2.50517	2.53032
2.47695	2.49602	2.52431	2.51021	2.52091	2.53344	2.4613	2.53388	2.5323	2.50936	2.51575	2.53852	2.46954	2.52095	2.52531	2.51058	2.52797	2.53302	2.52495	2.48009	2.52619	2.51588	2.52788	2.53717	2.53264	2.51153	2.5274	2.53773	2.53412	2.52612	2.53362	2.4937	2.49299	2.41888	2.45937	2.44832	2.50165	2.44964	2.48547	2.52055	2.45292	2.51878	2.5104	2.52519	2.50935	2.51019	2.51514	2.50526	2.46433	2.49869
2.5083	2.53338	2.55727	2.54322	2.55482	2.57922	2.47971	2.57725	2.56751	2.5452	2.54976	2.57024	2.49488	2.56564	2.566	2.54721	2.56087	2.56322	2.56683	2.50994	2.55626	2.54618	2.57021	2.57736	2.57465	2.55908	2.55693	2.58053	2.58138	2.58128	2.58291	2.53819	2.53915	2.43231	2.46846	2.47248	2.556	2.48585	2.49622	2.53313	2.50319	2.54457	2.55133	2.56356	2.56501	2.5494	2.5645	2.54617	2.49808	2.54433
2.50224	2.51852	2.54228	2.51465	2.53719	2.57322	2.46571	2.56353	2.55641	2.5311	2.5443	2.5691	2.47732	2.54937	2.55708	2.53237	2.55039	2.54095	2.55689	2.49915	2.5457	2.53324	2.55417	2.568	2.55893	2.53959	2.54267	2.56235	2.56514	2.56226	2.5585	2.51919	2.51897	2.4332	2.48181	2.46681	2.52941	2.47447	2.52236	2.55089	2.49395	2.54702	2.55308	2.56186	2.55215	2.54356	2.53854	2.55719	2.5017	2.52791
2.50042	2.52839	2.55969	2.53963	2.56082	2.60348	2.47725	2.59359	2.5908	2.54356	2.55961	2.59599	2.48433	2.581	2.58824	2.54172	2.58069	2.56228	2.5863	2.50624	2.56705	2.54846	2.58796	2.59228	2.60215	2.56048	2.57853	2.60068	2.61251	2.59784	2.59915	2.52586	2.53066	2.43165	2.47185	2.46023	2.55021	2.47373	2.5075	2.55403	2.50781	2.56417	2.52629	2.55494	2.52383	2.56468	2.57436	2.54754	2.50133	2.55105
2.52168	2.53389	2.57609	2.54807	2.56671	2.60522	2.48222	2.58402	2.58343	2.54552	2.56157	2.60204	2.48729	2.57976	2.58327	2.55376	2.57439	2.57652	2.59573	2.51069	2.57968	2.55503	2.58101	2.60219	2.60652	2.56683	2.57295	2.59891	2.60043	2.59686	2.59065	2.53703	2.53602	2.44477	2.47567	2.47788	2.54584	2.47712	2.52997	2.55933	2.51485	2.56807	2.56539	2.595	2.57854	2.5523	2.57124	2.56357	2.51035	2.54853
2.4943	2.52136	2.54347	2.52631	2.54099	2.58026	2.47798	2.56515	2.56355	2.53903	2.53972	2.56698	2.48437	2.55008	2.56053	2.54076	2.55984	2.54837	2.5546	2.49841	2.55937	2.54958	2.55815	2.56975	2.57861	2.55241	2.54992	2.56922	2.58167	2.58624	2.56475	2.50629	2.52267	2.43508	2.47254	2.46714	2.53502	2.47437	2.50593	2.53912	2.50567	2.54961	2.52275	2.55554	2.53063	2.5539	2.54505	2.54086	2.49625	2.53986
2.51185	2.52377	2.56556	2.54448	2.56002	2.58214	2.48708	2.57797	2.56203	2.54644	2.55293	2.57855	2.4899	2.57147	2.56224	2.55379	2.57288	2.57415	2.57371	2.50519	2.57444	2.55004	2.57569	2.59254	2.59296	2.56602	2.56818	2.59154	2.5919	2.59299	2.5773	2.52217	2.51702	2.43217	2.47174	2.46002	2.53681	2.46449	2.50839	2.53737	2.48448	2.54747	2.53302	2.54312	2.52721	2.53186	2.556	2.53264	2.49566	2.54321
2.45046	2.46544	2.46165	2.45917	2.46531	2.48796	2.43345	2.47558	2.48322	2.46109	2.47036	2.48345	2.44162	2.47029	2.48285	2.46732	2.47043	2.47351	2.47509	2.45803	2.47037	2.45631	2.47367	2.48295	2.47966	2.47653	2.46869	2.47998	2.475	2.47923	2.47582	2.44532	2.44716	2.40578	2.43706	2.42022	2.45259	2.43552	2.45125	2.46014	2.44388	2.46112	2.46714	2.46941	2.46645	2.45682	2.4704	2.46932	2.43534	2.45852
2.52307	2.5341	2.59494	2.56158	2.59786	2.61462	2.4913	2.61666	2.61392	2.56685	2.59407	2.6201	2.50164	2.60993	2.61551	2.58518	2.59542	2.60783	2.61804	2.51624	2.61339	2.58358	2.614	2.6247	2.64002	2.59145	2.60742	2.62223	2.63388	2.6301	2.62496	2.52431	2.53019	2.42491	2.47602	2.45468	2.54716	2.47429	2.51383	2.56283	2.49674	2.56862	2.54494	2.5575	2.54788	2.57067	2.57451	2.54489	2.48664	2.56017
2.50946	2.52589	2.55935	2.54306	2.56834	2.59543	2.48281	2.57446	2.58073	2.56497	2.57239	2.58585	2.49046	2.56811	2.5879	2.56434	2.56505	2.58529	2.57586	2.51026	2.60116	2.56889	2.57895	2.60344	2.60452	2.5735	2.57561	2.58332	2.60047	2.60296	2.58607	2.50085	2.52462	2.43003	2.47159	2.46233	2.5383	2.47856	2.5122	2.53082	2.49806	2.55396	2.5473	2.56884	2.56179	2.55892	2.56716	2.56068	2.49298	2.50113
2.51648	2.53287	2.59718	2.55305	2.59974	2.63262	2.48914	2.62925	2.6125	2.56458	2.58772	2.62748	2.4964	2.62329	2.61253	2.57267	2.61475	2.60703	2.61819	2.51936	2.60582	2.57373	2.62	2.63799	2.64242	2.59419	2.61248	2.63191	2.63865	2.63232	2.63085	2.52709	2.521	2.42661	2.47231	2.45571	2.54284	2.46753	2.51663	2.55993	2.49676	2.5748	2.56048	2.57742	2.55907	2.56585	2.57444	2.55998	2.4967	2.56616
2.48156	2.50227	2.50739	2.50119	2.51851	2.53705	2.45829	2.52859	2.52758	2.50204	2.51252	2.5334	2.47828	2.51479	2.52849	2.52271	2.50811	2.54034	2.52371	2.49225	2.54093	2.51645	2.52528	2.54097	2.53816	2.51072	2.51781	2.53748	2.53088	2.53131	2.53633	2.48155	2.48799	2.41293	2.44967	2.43393	2.48114	2.44984	2.4805	2.51349	2.46158	2.51951	2.51607	2.51472	2.51041	2.51117	2.52244	2.50594	2.45861	2.49864
2.51984	2.53821	2.58591	2.55474	2.58955	2.62028	2.48792	2.61298	2.60982	2.56389	2.58664	2.62598	2.50282	2.6106	2.60725	2.56954	2.59964	2.59881	2.62046	2.52034	2.60195	2.57453	2.61184	2.62528	2.63654	2.58653	2.60739	2.61954	2.63832	2.63128	2.61936	2.51669	2.52784	2.42339	2.47632	2.44951	2.5415	2.46572	2.51492	2.56094	2.48913	2.57549	2.55123	2.5646	2.54739	2.56482	2.57849	2.54999	2.49102	2.56142
2.50996	2.52975	2.5748	2.54797	2.58082	2.61615	2.48719	2.61048	2.59606	2.55812	2.5711	2.61257	2.4956	2.60117	2.59242	2.56065	2.59239	2.59601	2.60203	2.51503	2.59715	2.56456	2.6032	2.62159	2.62278	2.57922	2.60234	2.61571	2.62511	2.61647	2.6171	2.5205	2.52579	2.42664	2.47667	2.44822	2.53947	2.47575	2.51434	2.55721	2.49009	2.56943	2.54772	2.55516	2.53554	2.55067	2.56635	2.53468	2.49202	2.55621
2.50055	2.52021	2.56621	2.53146	2.56614	2.60695	2.48428	2.60162	2.58886	2.54624	2.55165	2.60197	2.48117	2.59627	2.58866	2.55576	2.57683	2.58628	2.59581	2.51593	2.58231	2.56331	2.59929	2.60094	2.60739	2.57603	2.57645	2.60426	2.59927	2.60317	2.60831	2.51857	2.51775	2.42615	2.46289	2.46005	2.54115	2.47004	2.51748	2.55595	2.49178	2.56344	2.5498	2.55407	2.54104	2.5545	2.5625	2.53931	2.48663	2.56009
2.50624	2.52159	2.56652	2.53261	2.55508	2.59297	2.47524	2.59849	2.57554	2.53533	2.5497	2.58757	2.47125	2.5899	2.58053	2.5398	2.56739	2.57326	2.58815	2.50122	2.56652	2.54202	2.57761	2.59814	2.5968	2.55656	2.57331	2.59484	2.59567	2.58949	2.59141	2.52416	2.51402	2.42748	2.46284	2.46315	2.53402	2.46962	2.51021	2.55424	2.48263	2.55492	2.55154	2.56392	2.54578	2.57012	2.57039	2.54753	2.49561	2.55025
2.51419	2.53333	2.57751	2.55272	2.58136	2.61143	2.48376	2.59787	2.59532	2.55911	2.57312	2.60892	2.49572	2.6014	2.59536	2.56675	2.58968	2.59629	2.60157	2.51387	2.59292	2.5704	2.59976	2.62043	2.63032	2.58058	2.60098	2.6064	2.62532	2.62606	2.60529	2.51914	2.52873	2.43048	2.47629	2.44622	2.54188	2.47708	2.51717	2.5613	2.48941	2.56687	2.54798	2.55836	2.54282	2.56031	2.56839	2.54563	2.48542	2.55421
2.49361	2.51774	2.53282	2.5121	2.53914	2.56999	2.47326	2.56281	2.56041	2.52364	2.53907	2.5642	2.47254	2.55825	2.55745	2.53273	2.5437	2.54718	2.56753	2.49246	2.54946	2.5325	2.56225	2.57922	2.5711	2.53368	2.55474	2.57581	2.57338	2.5705	2.57156	2.50254	2.5167	2.42501	2.462	2.43567	2.53058	2.46681	2.50356	2.54719	2.49113	2.54999	2.53957	2.5433	2.53291	2.54061	2.54585	2.53161	2.48846	2.53673
2.50191	2.51376	2.54595	2.51458	2.54204	2.56849	2.47489	2.5655	2.55672	2.52334	2.53312	2.55723	2.47346	2.55153	2.55042	2.52428	2.54788	2.54742	2.55524	2.49851	2.54891	2.51853	2.54781	2.56124	2.56098	2.53687	2.54999	2.56466	2.56399	2.55805	2.55771	2.49782	2.50071	2.43002	2.46569	2.45306	2.51378	2.46239	2.49962	2.53239	2.48448	2.54671	2.52628	2.5387	2.52361	2.5294	2.53364	2.52754	2.4936	2.53008
2.51006	2.52047	2.56394	2.53632	2.56183	2.59145	2.47927	2.59777	2.58231	2.54581	2.55295	2.60569	2.47645	2.59292	2.58591	2.54522	2.58826	2.57665	2.60131	2.50249	2.58078	2.54328	2.58816	2.61503	2.61287	2.56567	2.58178	2.60131	2.61092	2.59861	2.60502	2.52672	2.5287	2.43269	2.47645	2.45821	2.5449	2.48661	2.51956	2.55804	2.50265	2.57672	2.5551	2.56291	2.55069	2.55906	2.56908	2.54598	2.49397	2.56078
2.48208	2.50305	2.51379	2.50235	2.52147	2.5496	2.45751	2.53198	2.53425	2.50588	2.51266	2.53323	2.46658	2.52895	2.53388	2.51377	2.52701	2.52778	2.53234	2.47639	2.52709	2.5104	2.53189	2.54437	2.54371	2.51142	2.52465	2.53772	2.54231	2.5554	2.53947	2.49934	2.50555	2.42703	2.46481	2.43899	2.51086	2.46837	2.50287	2.53544	2.48176	2.53243	2.51441	2.52402	2.50554	2.52026	2.52626	2.5129	2.46949	2.50879
2.49593	2.50567	2.53913	2.52031	2.53672	2.56809	2.46788	2.55649	2.55403	2.52674	2.53469	2.55736	2.47941	2.54252	2.55431	2.53828	2.53986	2.55295	2.5477	2.49826	2.54978	2.53593	2.54329	2.56209	2.57592	2.54598	2.54901	2.55567	2.56716	2.57519	2.55878	2.51922	2.52385	2.42795	2.47508	2.45553	2.53213	2.48474	2.51349	2.55178	2.49227	2.55088	2.53457	2.54976	2.53209	2.54431	2.55558	2.52251	2.48313	2.52949
2.49094	2.49967	2.53453	2.51855	2.52576	2.57178	2.46861	2.56411	2.56132	2.51279	2.52159	2.56596	2.47162	2.55177	2.55514	2.52004	2.54335	2.54665	2.56413	2.49398	2.54414	2.51958	2.55403	2.57062	2.56659	2.53277	2.54678	2.56289	2.56246	2.56363	2.56431	2.50895	2.49847	2.42698	2.45917	2.44256	2.51909	2.47388	2.49593	2.54324	2.47534	2.52971	2.5268	2.54223	2.51909	2.53216	2.5454	2.51382	2.46749	2.53368
2.49952	2.51089	2.5417	2.51298	2.53365	2.57673	2.46991	2.55941	2.548	2.52188	2.5166	2.56134	2.47511	2.54588	2.54742	2.51746	2.5401	2.53765	2.5547	2.49213	2.5349	2.50934	2.53861	2.56309	2.55836	2.53495	2.53785	2.55741	2.55912	2.55802	2.55176	2.50617	2.51152	2.41876	2.47981	2.45187	2.51794	2.4713	2.51375	2.53066	2.49479	2.54424	2.54481	2.55462	2.53711	2.54058	2.5343	2.53266	2.50043	2.52484
2.51405	2.51874	2.56784	2.54202	2.56295	2.61245	2.48316	2.59891	2.5913	2.54364	2.56059	2.6213	2.47999	2.6091	2.60312	2.53832	2.58784	2.57281	2.61338	2.5046	2.56512	2.53086	2.59508	2.61867	2.61414	2.56631	2.58879	2.61054	2.61666	2.60674	2.60341	2.53611	2.53152	2.43488	2.48795	2.46882	2.55171	2.482	2.52489	2.56846	2.51001	2.57972	2.56966	2.58611	2.57065	2.5842	2.57836	2.56206	2.5266	2.57082
2.50155	2.52118	2.5452	2.53443	2.55819	2.58313	2.4783	2.57551	2.57982	2.54263	2.55474	2.5831	2.48162	2.56663	2.57991	2.54361	2.5663	2.56889	2.57988	2.50575	2.56794	2.54887	2.57584	2.60421	2.59652	2.55929	2.57641	2.59151	2.6012	2.59458	2.58991	2.52623	2.52936	2.4308	2.4766	2.45266	2.53018	2.47411	2.52	2.5497	2.49943	2.55845	2.54331	2.55917	2.54441	2.54476	2.54561	2.53742	2.48199	2.54316
2.49367	2.50564	2.53717	2.51665	2.54322	2.57318	2.47069	2.56045	2.54729	2.52274	2.52966	2.56186	2.47455	2.54793	2.55419	2.53357	2.54383	2.5482	2.55578	2.49322	2.55594	2.53849	2.55393	2.57079	2.57457	2.54696	2.55316	2.56727	2.57416	2.5743	2.56499	2.50883	2.51736	2.42874	2.46812	2.43819	2.51491	2.46733	2.50581	2.54113	2.48558	2.54195	2.52892	2.54191	2.52157	2.53188	2.53549	2.52737	2.4856	2.5309
2.50533	2.51609	2.55938	2.53784	2.56128	2.59715	2.47937	2.58813	2.5837	2.53599	2.55572	2.59935	2.47817	2.58265	2.58997	2.5455	2.55934	2.58275	2.59662	2.5064	2.57538	2.54357	2.57619	2.60415	2.60838	2.56388	2.57463	2.59891	2.60795	2.59927	2.59612	2.51752	2.5146	2.43018	2.46761	2.4472	2.53807	2.4837	2.49951	2.54469	2.49286	2.55269	2.54839	2.55762	2.54617	2.55255	2.55717	2.5276	2.48883	2.54388
2.49292	2.53628	2.54444	2.54612	2.57871	2.5906	2.48219	2.5695	2.59558	2.56093	2.58073	2.63101	2.48609	2.60023	2.60848	2.54406	2.57863	2.58655	2.61246	2.5201	2.57174	2.54285	2.59099	2.62065	2.61941	2.58976	2.5833	2.61965	2.62997	2.62098	2.61479	2.54766	2.55592	2.44152	2.491	2.46935	2.56477	2.48734	2.54276	2.57636	2.53011	2.59729	2.57987	2.61296	2.58513	2.60294	2.59374	2.58327	2.5315	2.58173
2.51296	2.528	2.56573	2.54642	2.57582	2.61765	2.48602	2.58825	2.59232	2.54542	2.56815	2.60859	2.48189	2.59287	2.59073	2.54573	2.58479	2.57801	2.59976	2.52396	2.55971	2.54507	2.59146	2.6018	2.60963	2.57616	2.59058	2.61566	2.61518	2.60436	2.61742	2.54379	2.54602	2.4414	2.50754	2.47792	2.55769	2.49233	2.54918	2.57162	2.53187	2.59454	2.57638	2.59516	2.58052	2.59737	2.58023	2.56824	2.53215	2.57506
2.50338	2.52761	2.5622	2.54464	2.56942	2.59703	2.49291	2.59064	2.58634	2.53759	2.56163	2.60156	2.47947	2.59698	2.5803	2.54032	2.56849	2.57246	2.58562	2.51964	2.56187	2.54054	2.58418	2.58363	2.60301	2.57527	2.57189	2.60792	2.60707	2.59212	2.61218	2.53619	2.5265	2.43909	2.48294	2.46513	2.55147	2.4861	2.52998	2.54764	2.51469	2.56628	2.56072	2.58504	2.57082	2.57375	2.57416	2.56122	2.51403	2.55756
2.50651	2.51543	2.57587	2.54762	2.58503	2.61982	2.4725	2.60945	2.60469	2.55445	2.57278	2.62588	2.48935	2.60323	2.6088	2.54317	2.58907	2.58846	2.60714	2.51967	2.57076	2.53826	2.59684	2.61284	2.61372	2.58302	2.59298	2.61747	2.62	2.60608	2.61614	2.55045	2.54781	2.43849	2.49818	2.47487	2.56331	2.49728	2.54397	2.56871	2.53191	2.5902	2.57192	2.59118	2.57378	2.59699	2.5711	2.56601	2.52911	2.573
2.49058	2.51436	2.53174	2.52749	2.55717	2.58821	2.47995	2.57888	2.56713	2.53996	2.56092	2.59956	2.48258	2.5781	2.58103	2.53316	2.57825	2.57185	2.58372	2.51319	2.56738	2.54187	2.57549	2.59652	2.60186	2.57581	2.56437	2.59975	2.60655	2.59982	2.59644	2.5341	2.54369	2.43684	2.49022	2.47257	2.54772	2.49038	2.53048	2.56207	2.52123	2.57511	2.56474	2.59097	2.57055	2.57907	2.56805	2.56005	2.51472	2.5589
2.5084	2.5256	2.57225	2.55041	2.57304	2.61637	2.4821	2.59593	2.58997	2.54826	2.56542	2.61252	2.49345	2.59898	2.59122	2.55479	2.58672	2.57175	2.60746	2.51364	2.57138	2.5529	2.5905	2.61429	2.61507	2.57328	2.58631	2.61326	2.62703	2.61501	2.59468	2.53948	2.53958	2.43492	2.48775	2.47991	2.55822	2.47893	2.5324	2.5658	2.52033	2.56984	2.56911	2.59823	2.57485	2.5733	2.57182	2.57217	2.51439	2.56253
2.51436	2.52542	2.57517	2.55107	2.57642	2.62547	2.48014	2.62036	2.60033	2.55688	2.57194	2.6283	2.47147	2.62286	2.60784	2.54315	2.61462	2.57569	2.61257	2.51816	2.56865	2.54479	2.61316	2.61042	2.6227	2.58868	2.60335	2.62306	2.61866	2.59643	2.60729	2.54489	2.53969	2.43596	2.49353	2.47083	2.55689	2.4915	2.53567	2.56814	2.52013	2.58184	2.58721	2.6051	2.58912	2.59763	2.58109	2.58814	2.52316	2.58378
2.51509	2.53123	2.56846	2.54286	2.57669	2.61892	2.47825	2.6016	2.59542	2.54642	2.57913	2.62278	2.48416	2.61271	2.60077	2.54401	2.58888	2.57947	2.61319	2.51042	2.5709	2.5411	2.59911	2.61779	2.62406	2.58031	2.59317	2.63174	2.62908	2.61015	2.61921	2.53955	2.53469	2.43536	2.48689	2.46884	2.55252	2.48118	2.5325	2.56423	2.51961	2.57179	2.56564	2.59437	2.56747	2.58497	2.57229	2.5609	2.52907	2.56514
2.51023	2.5244	2.5675	2.54805	2.56579	2.60123	2.47976	2.58123	2.57773	2.54594	2.57091	2.59608	2.49223	2.5823	2.58257	2.5531	2.57317	2.58214	2.59511	2.50897	2.57741	2.55653	2.58745	2.60413	2.61325	2.58271	2.58481	2.60705	2.60756	2.60039	2.59102	2.5234	2.52011	2.43064	2.47442	2.46197	2.53409	2.4664	2.52019	2.55345	2.50234	2.56604	2.55483	2.57708	2.55416	2.56506	2.56314	2.54572	2.50146	2.55017
2.50479	2.53269	2.55972	2.54692	2.57558	2.62416	2.48428	2.59871	2.60101	2.5606	2.58508	2.63137	2.4873	2.61632	2.61608	2.55189	2.60142	2.58406	2.63055	2.5261	2.581	2.55352	2.59082	2.63324	2.63328	2.58893	2.59432	2.6206	2.6498	2.62538	2.62144	2.54345	2.54636	2.4335	2.49168	2.46896	2.56117	2.48661	2.53748	2.57483	2.52832	2.59323	2.58241	2.6101	2.58646	2.59783	2.58172	2.57839	2.52691	2.58022
2.51449	2.52756	2.56155	2.54149	2.57205	2.60918	2.48332	2.58589	2.59278	2.5512	2.57882	2.61398	2.49006	2.5941	2.60069	2.55165	2.58753	2.5863	2.60452	2.51513	2.58003	2.54834	2.58494	2.60907	2.61682	2.57081	2.58288	2.61074	2.61702	2.60264	2.59644	2.53928	2.53604	2.43918	2.49102	2.46596	2.55513	2.4787	2.53285	2.5695	2.5227	2.58004	2.55773	2.58408	2.56784	2.57842	2.56688	2.56529	2.52822	2.55906
2.50135	2.5242	2.56993	2.54554	2.57594	2.62911	2.48074	2.61338	2.60865	2.57208	2.58133	2.64105	2.48443	2.63181	2.6218	2.55707	2.61558	2.59255	2.6319	2.53582	2.58521	2.55652	2.5981	2.63496	2.64797	2.6047	2.58505	2.60881	2.65558	2.62998	2.61848	2.55269	2.54987	2.43887	2.4911	2.47159	2.56018	2.4876	2.54017	2.57333	2.52447	2.58963	2.58397	2.61373	2.59672	2.60224	2.59563	2.5863	2.53702	2.5755
2.49926	2.51837	2.56056	2.53963	2.55694	2.594	2.47557	2.58215	2.57287	2.5381	2.55756	2.5765	2.48516	2.57731	2.56207	2.5362	2.56966	2.5643	2.57105	2.50098	2.55771	2.542	2.57876	2.5923	2.59663	2.56136	2.5699	2.5852	2.59424	2.59441	2.58609	2.51967	2.51153	2.42701	2.4637	2.45695	2.53212	2.46596	2.50892	2.54542	2.48164	2.54893	2.53841	2.55418	2.54394	2.5424	2.54857	2.54135	2.49293	2.54761
2.5177	2.54172	2.5671	2.55263	2.57643	2.62176	2.48661	2.59812	2.60121	2.56371	2.58878	2.62754	2.49528	2.60577	2.61073	2.56682	2.59767	2.59712	2.61415	2.53338	2.58807	2.57089	2.60079	2.61964	2.63157	2.59893	2.59118	2.62607	2.62984	2.62757	2.62101	2.55353	2.54424	2.44023	2.4918	2.46889	2.56327	2.48796	2.53859	2.57152	2.52105	2.58738	2.57131	2.61218	2.59037	2.59942	2.5805	2.58408	2.53407	2.57245
2.51924	2.53068	2.58553	2.56079	2.58594	2.63997	2.48308	2.63215	2.61331	2.56998	2.57532	2.64625	2.48843	2.63855	2.61678	2.55431	2.61488	2.57668	2.64308	2.52441	2.57033	2.55094	2.62067	2.62429	2.63783	2.59789	2.60667	2.63881	2.64296	2.62962	2.63164	2.55167	2.54999	2.43842	2.49212	2.47527	2.57187	2.49509	2.53751	2.56809	2.52928	2.58385	2.57935	2.61186	2.58549	2.59729	2.58483	2.58007	2.53076	2.57244
2.50749	2.5286	2.56491	2.54584	2.5718	2.6217	2.48423	2.58614	2.5944	2.56282	2.58298	2.63708	2.48598	2.61804	2.6166	2.55924	2.59857	2.60128	2.62211	2.52973	2.6009	2.5671	2.59939	2.62958	2.63597	2.6045	2.58591	2.61415	2.6414	2.63082	2.62712	2.54606	2.54	2.43842	2.48811	2.47492	2.55917	2.49171	2.54263	2.57439	2.523	2.59237	2.57633	2.61123	2.58264	2.58985	2.591	2.57312	2.52581	2.57342
2.51709	2.52397	2.56018	2.5401	2.5656	2.62088	2.48688	2.61006	2.59119	2.5483	2.55409	2.62041	2.47898	2.61626	2.60003	2.53365	2.59556	2.56817	2.61462	2.51647	2.55102	2.52861	2.58769	2.61519	2.61479	2.56601	2.58279	2.59157	2.61463	2.59404	2.61014	2.54723	2.54545	2.44038	2.4954	2.48227	2.56077	2.49217	2.53975	2.56923	2.52789	2.59175	2.58166	2.60569	2.58156	2.59692	2.58233	2.57135	2.53546	2.56924
2.51508	2.52663	2.57886	2.5405	2.58161	2.6431	2.48208	2.62579	2.61745	2.55684	2.57638	2.65037	2.48565	2.64637	2.62201	2.54368	2.60925	2.58456	2.63612	2.52658	2.56909	2.54449	2.60819	2.63681	2.63924	2.59054	2.6013	2.61753	2.63704	2.6156	2.6248	2.55142	2.5474	2.43609	2.49187	2.47468	2.56566	2.48919	2.53706	2.57649	2.52191	2.59192	2.58258	2.61961	2.59383	2.60817	2.58553	2.58043	2.53684	2.57689
2.51171	2.52468	2.56853	2.53737	2.56683	2.61482	2.47758	2.59738	2.59317	2.54202	2.56373	2.61696	2.48048	2.60348	2.603	2.54058	2.58513	2.57646	2.6097	2.51152	2.56145	2.54071	2.59511	2.61153	2.60626	2.56747	2.58564	2.61283	2.60957	2.60318	2.60813	2.54436	2.53525	2.43172	2.48731	2.47381	2.55112	2.47905	2.53134	2.57312	2.50256	2.582	2.57896	2.5964	2.5778	2.58698	2.58403	2.57148	2.51714	2.56835
2.50237	2.51577	2.55284	2.53947	2.56413	2.57945	2.47806	2.56628	2.56375	2.54728	2.55483	2.57397	2.48347	2.56423	2.56964	2.54337	2.5707	2.55746	2.56427	2.50457	2.55659	2.53546	2.58066	2.58361	2.58799	2.56092	2.56924	2.5833	2.59112	2.5856	2.58258	2.51315	2.52013	2.43678	2.4827	2.46337	2.53232	2.47796	2.51758	2.53659	2.51191	2.55306	2.55728	2.57141	2.55595	2.56023	2.56398	2.56207	2.51065	2.54267
2.48964	2.51304	2.53139	2.51398	2.53414	2.5742	2.47402	2.55428	2.5512	2.52211	2.53069	2.5677	2.47755	2.55582	2.55275	2.52383	2.55705	2.54561	2.55379	2.49819	2.53998	2.52824	2.56571	2.56714	2.57822	2.5542	2.54633	2.567	2.5753	2.57533	2.56227	2.51632	2.51114	2.42879	2.47388	2.45946	2.52236	2.46558	2.51526	2.54868	2.50225	2.5543	2.55131	2.56816	2.55539	2.54793	2.55501	2.55169	2.51378	2.53941
2.4765	2.48553	2.51999	2.49221	2.51497	2.55374	2.45793	2.53962	2.5316	2.50524	2.50795	2.53892	2.46564	2.52991	2.53473	2.50745	2.52594	2.52459	2.53598	2.48529	2.51956	2.50366	2.52712	2.5419	2.54269	2.51802	2.52185	2.53734	2.54368	2.53628	2.5336	2.4937	2.49891	2.42743	2.46177	2.44355	2.5045	2.45758	2.49316	2.52619	2.48063	2.52503	2.52898	2.53496	2.5253	2.51527	2.52861	2.52054	2.48827	2.51778
2.51571	2.53307	2.56614	2.54256	2.56918	2.60925	2.48102	2.58061	2.58924	2.54884	2.56234	2.60153	2.48356	2.59104	2.58671	2.54257	2.58222	2.56655	2.58904	2.51584	2.56287	2.54632	2.58838	2.5958	2.59561	2.5682	2.57453	2.60436	2.60273	2.59453	2.59315	2.53374	2.53959	2.44178	2.5111	2.47863	2.55639	2.49324	2.54707	2.56758	2.53412	2.58222	2.57869	2.59514	2.58275	2.58165	2.57717	2.5749	2.53219	2.56316
2.50896	2.5268	2.57369	2.54295	2.57733	2.59347	2.4829	2.5924	2.5865	2.55149	2.56997	2.60215	2.48431	2.59502	2.58396	2.54688	2.58403	2.57341	2.59138	2.51978	2.55311	2.54011	2.57914	2.59523	2.5984	2.5733	2.57894	2.59525	2.60201	2.59776	2.61604	2.53306	2.53352	2.44024	2.48545	2.47025	2.54691	2.48791	2.52979	2.55016	2.51792	2.57399	2.55241	2.58046	2.56639	2.56994	2.55936	2.55929	2.50935	2.55386
2.5041	2.51507	2.5434	2.53121	2.54794	2.57314	2.47913	2.56964	2.56686	2.53253	2.54306	2.58034	2.48449	2.57056	2.55641	2.54228	2.55445	2.56307	2.56589	2.51373	2.54946	2.53693	2.55795	2.569	2.57831	2.55728	2.55777	2.57219	2.57868	2.57038	2.58012	2.51215	2.51516	2.43479	2.47693	2.45792	2.52408	2.46986	2.51188	2.53297	2.50273	2.55022	2.52971	2.55339	2.53999	2.54504	2.5431	2.53515	2.49257	2.53419
2.51181	2.5159	2.53312	2.52313	2.53806	2.57648	2.4732	2.56012	2.55781	2.53652	2.54283	2.57129	2.48023	2.56275	2.55184	2.53935	2.5622	2.54354	2.56506	2.50407	2.53693	2.52909	2.55862	2.56733	2.56369	2.54717	2.55248	2.56998	2.57102	2.56893	2.57417	2.53702	2.54213	2.44255	2.4876	2.47753	2.54241	2.48392	2.51622	2.54497	2.50951	2.55629	2.54553	2.56352	2.54967	2.55034	2.5553	2.55276	2.50758	2.54921
2.50229	2.51037	2.54842	2.53823	2.55196	2.58717	2.47366	2.56318	2.56756	2.54011	2.55549	2.5783	2.48994	2.55851	2.56058	2.54438	2.5607	2.55852	2.568	2.50909	2.54961	2.54088	2.56157	2.58016	2.57581	2.55749	2.55393	2.57797	2.57616	2.57578	2.58645	2.54341	2.55813	2.46305	2.49903	2.4978	2.55247	2.50002	2.5444	2.56126	2.53663	2.56105	2.56953	2.58088	2.57417	2.55839	2.56639	2.57154	2.51075	2.5494
2.51678	2.52224	2.55637	2.54108	2.55678	2.58996	2.4727	2.56946	2.57113	2.54336	2.55473	2.58379	2.49521	2.56388	2.57556	2.55358	2.56404	2.56365	2.56817	2.51587	2.56126	2.54797	2.56411	2.58446	2.58027	2.56306	2.558	2.58073	2.57496	2.57309	2.58186	2.55976	2.55309	2.45391	2.49351	2.49713	2.55525	2.50029	2.53991	2.55527	2.54066	2.55991	2.57501	2.58013	2.57979	2.56857	2.56932	2.57244	2.50956	2.54324
2.52542	2.53818	2.58463	2.54903	2.57742	2.63106	2.48641	2.60943	2.60105	2.55234	2.57683	2.63459	2.50248	2.60561	2.60313	2.55796	2.59052	2.57108	2.61552	2.52317	2.56563	2.54947	2.60272	2.61357	2.61339	2.57956	2.59072	2.63099	2.6219	2.61028	2.62829	2.56891	2.56696	2.45114	2.50491	2.49828	2.57768	2.50544	2.55412	2.57994	2.55907	2.60127	2.59187	2.61445	2.59642	2.60134	2.58129	2.5898	2.53597	2.57424
2.52299	2.53352	2.57547	2.54894	2.57573	2.63027	2.48458	2.60964	2.59411	2.55292	2.57751	2.63496	2.49501	2.61111	2.60196	2.54687	2.598	2.56673	2.61661	2.50838	2.5563	2.53876	2.60624	2.60821	2.61662	2.57717	2.59003	2.62621	2.62265	2.60995	2.62408	2.55647	2.55702	2.45019	2.50784	2.4885	2.57021	2.50234	2.55495	2.57938	2.54398	2.5945	2.58458	2.6033	2.59456	2.59073	2.58366	2.5809	2.53925	2.57012
2.50433	2.51187	2.54739	2.53621	2.55281	2.58591	2.47376	2.56042	2.56406	2.53655	2.54801	2.58073	2.48212	2.55894	2.56948	2.5432	2.55397	2.56683	2.56237	2.50307	2.56238	2.54169	2.56219	2.58304	2.57989	2.5574	2.55749	2.57883	2.5831	2.58324	2.58037	2.52106	2.53219	2.43665	2.49085	2.47374	2.54805	2.4903	2.53097	2.55641	2.51993	2.55764	2.55494	2.56921	2.55798	2.56384	2.57133	2.57225	2.50913	2.54862
2.46876	2.48744	2.49272	2.48363	2.47934	2.51413	2.45064	2.50294	2.50526	2.48165	2.48465	2.51541	2.45179	2.50013	2.50393	2.47874	2.49861	2.49153	2.50489	2.46977	2.48879	2.48253	2.49735	2.50735	2.50076	2.4894	2.48814	2.51163	2.50146	2.50321	2.51055	2.47628	2.48384	2.43275	2.46089	2.46139	2.48381	2.45834	2.49267	2.4891	2.48123	2.49777	2.5049	2.51659	2.50372	2.50598	2.49891	2.49986	2.48154	2.49096
2.49067	2.49547	2.50948	2.50454	2.51121	2.54226	2.46545	2.52234	2.5335	2.50823	2.51553	2.53769	2.4723	2.52658	2.52629	2.51063	2.52782	2.5157	2.53393	2.48656	2.51682	2.50432	2.5209	2.53746	2.53151	2.52191	2.51263	2.53105	2.52662	2.53627	2.53335	2.50824	2.51374	2.43647	2.4898	2.46934	2.52107	2.47201	2.51879	2.5246	2.509	2.5229	2.52344	2.54205	2.52342	2.52847	2.52568	2.52943	2.50562	2.51444
2.46776	2.4787	2.48722	2.47916	2.4844	2.5013	2.43897	2.49196	2.49493	2.48702	2.48981	2.50554	2.45468	2.49021	2.49607	2.48357	2.48561	2.4918	2.49212	2.46975	2.48521	2.47335	2.48436	2.49568	2.49676	2.49277	2.48238	2.49518	2.49285	2.49301	2.50057	2.47403	2.49173	2.42843	2.45913	2.45759	2.4911	2.45605	2.48297	2.48483	2.4795	2.48708	2.4923	2.50584	2.50092	2.48844	2.49707	2.50201	2.47033	2.48911
2.45839	2.47146	2.47808	2.47119	2.47841	2.49215	2.44302	2.48795	2.48776	2.47316	2.47353	2.48431	2.45621	2.48348	2.47958	2.47741	2.4826	2.4893	2.48123	2.46212	2.4843	2.48178	2.48868	2.48792	2.4891	2.48418	2.48097	2.49109	2.48566	2.49184	2.49411	2.47758	2.47467	2.42412	2.44592	2.44496	2.4821	2.44843	2.46897	2.46485	2.47097	2.47573	2.47774	2.4905	2.48682	2.47419	2.48072	2.48114	2.4612	2.47301
2.49723	2.50647	2.52981	2.52194	2.5366	2.57282	2.47634	2.54643	2.56132	2.52204	2.53601	2.55667	2.48145	2.54691	2.55108	2.52894	2.54501	2.54118	2.55318	2.5005	2.53219	2.51869	2.54345	2.55573	2.55478	2.53867	2.53833	2.56149	2.55248	2.55598	2.55336	2.52049	2.52765	2.44159	2.49763	2.46986	2.53657	2.48494	2.53181	2.53761	2.51927	2.54165	2.53277	2.54547	2.53343	2.5392	2.53421	2.53897	2.52107	2.5456
2.47905	2.49002	2.50979	2.49003	2.50204	2.52323	2.45314	2.51688	2.5204	2.49543	2.50281	2.51454	2.47073	2.50825	2.50761	2.4962	2.51008	2.5073	2.51972	2.47771	2.50096	2.49171	2.51511	2.51917	2.51197	2.49944	2.50655	2.52624	2.51569	2.51349	2.52179	2.49346	2.49505	2.42853	2.46606	2.4543	2.49923	2.4634	2.50185	2.4991	2.48247	2.5013	2.51147	2.52548	2.5198	2.50615	2.50599	2.51341	2.48054	2.49101
2.50959	2.516	2.55272	2.53635	2.5527	2.58693	2.47983	2.56281	2.56835	2.54269	2.55034	2.57788	2.49148	2.56709	2.55936	2.54278	2.55932	2.55585	2.56821	2.50576	2.55371	2.54111	2.56283	2.5788	2.57556	2.55463	2.5525	2.57099	2.56718	2.57386	2.57305	2.52845	2.54815	2.44268	2.50467	2.49554	2.54312	2.49393	2.53892	2.54865	2.54059	2.55176	2.56322	2.57974	2.56764	2.55928	2.56046	2.569	2.50603	2.54824
2.51348	2.52371	2.56951	2.54544	2.56718	2.62839	2.47732	2.59711	2.59743	2.55625	2.56996	2.61715	2.49087	2.59921	2.5855	2.54588	2.58953	2.5669	2.60637	2.5106	2.56373	2.53546	2.59002	2.60706	2.60464	2.5641	2.58511	2.61202	2.61193	2.60408	2.60312	2.54521	2.54224	2.44362	2.51459	2.47968	2.55458	2.48862	2.54886	2.57041	2.53992	2.5721	2.58249	2.60056	2.58623	2.58709	2.57777	2.57803	2.53752	2.56627
2.51928	2.53362	2.58447	2.54987	2.59257	2.6436	2.48658	2.62424	2.62159	2.55855	2.58101	2.63186	2.49002	2.63394	2.60369	2.55285	2.6215	2.57317	2.63598	2.51778	2.55876	2.54639	2.62046	2.63324	2.63331	2.58584	2.60778	2.63243	2.63507	2.62267	2.63324	2.55554	2.55773	2.43981	2.51266	2.47564	2.57305	2.50177	2.56081	2.58551	2.54319	2.6007	2.57839	2.60483	2.5799	2.59557	2.58495	2.57901	2.53756	2.58758
2.48607	2.49266	2.52058	2.5053	2.51706	2.54627	2.46174	2.52547	2.5386	2.51039	2.51521	2.52814	2.46362	2.52158	2.52924	2.50854	2.53287	2.52498	2.52664	2.48039	2.51047	2.5018	2.52893	2.52919	2.52708	2.52251	2.52126	2.5302	2.53364	2.5378	2.5374	2.51933	2.51746	2.44322	2.48507	2.48439	2.5232	2.48781	2.52506	2.52692	2.51558	2.5385	2.52794	2.53592	2.52372	2.5267	2.52756	2.53276	2.49782	2.52882
2.47302	2.49128	2.49802	2.48323	2.5036	2.53107	2.46217	2.51482	2.52731	2.49957	2.50796	2.51892	2.459	2.51062	2.52258	2.50507	2.50366	2.5211	2.50871	2.48499	2.51058	2.49422	2.51537	2.52241	2.52061	2.50256	2.50683	2.52568	2.51738	2.51829	2.51739	2.48361	2.49494	2.43009	2.45233	2.45067	2.48348	2.4593	2.49658	2.50679	2.47334	2.50157	2.52446	2.52357	2.52311	2.50138	2.51353	2.52164	2.46207	2.49717
2.488	2.50639	2.51947	2.50753	2.52341	2.55043	2.47126	2.5354	2.53628	2.50892	2.51753	2.5491	2.47027	2.53685	2.53614	2.51065	2.53677	2.52463	2.54231	2.49439	2.51175	2.50122	2.53958	2.5423	2.53856	2.52204	2.53505	2.54756	2.54847	2.54482	2.54482	2.52553	2.5175	2.44989	2.4892	2.46844	2.51637	2.47418	2.51746	2.52641	2.50868	2.53226	2.53436	2.53695	2.53298	2.52512	2.5345	2.53656	2.51027	2.5325
2.48854	2.49796	2.53918	2.51745	2.527	2.56529	2.47255	2.54491	2.55351	2.52738	2.52532	2.55669	2.47196	2.54539	2.54771	2.52048	2.54456	2.54129	2.54771	2.48296	2.53438	2.51535	2.5437	2.55409	2.55064	2.5399	2.54494	2.55354	2.55214	2.55513	2.55452	2.50461	2.51304	2.43235	2.48936	2.47185	2.50633	2.47362	2.52021	2.5297	2.51188	2.53169	2.52837	2.54324	2.52815	2.54312	2.52938	2.53485	2.50912	2.5336
2.4856	2.48989	2.51903	2.5108	2.5227	2.55214	2.46105	2.54976	2.54359	2.50777	2.52306	2.55264	2.46259	2.54504	2.55256	2.50803	2.54166	2.53378	2.54816	2.4912	2.52391	2.49974	2.54078	2.55616	2.55293	2.52194	2.53995	2.53519	2.54625	2.54148	2.54968	2.51123	2.51701	2.43268	2.4703	2.45636	2.52146	2.47045	2.51203	2.52151	2.50031	2.53835	2.52337	2.53743	2.5273	2.53508	2.53479	2.52712	2.48954	2.52944
2.46659	2.47452	2.48321	2.46959	2.47921	2.51002	2.44193	2.4956	2.495	2.47862	2.4759	2.50412	2.44114	2.48701	2.50105	2.4824	2.48909	2.49552	2.49628	2.46218	2.48164	2.47666	2.49166	2.49649	2.49316	2.48214	2.48492	2.49666	2.4952	2.49465	2.49496	2.4702	2.48151	2.41749	2.4482	2.42813	2.47849	2.43765	2.48095	2.48711	2.46566	2.49804	2.48193	2.48883	2.48374	2.48195	2.48504	2.47699	2.46311	2.4807
2.50315	2.50835	2.5351	2.51902	2.53573	2.56459	2.47479	2.54792	2.55005	2.53149	2.53269	2.55075	2.4806	2.54278	2.53939	2.53079	2.54287	2.54808	2.54209	2.50103	2.54737	2.52975	2.54942	2.5642	2.55263	2.54278	2.54692	2.55648	2.5585	2.56543	2.55458	2.51407	2.52168	2.4325	2.47907	2.47141	2.51508	2.48268	2.52332	2.53201	2.50645	2.53855	2.53732	2.55605	2.53543	2.54455	2.53638	2.54621	2.50261	2.52909
2.50131	2.50354	2.5383	2.51802	2.53281	2.56744	2.47095	2.56417	2.55449	2.52471	2.53739	2.56033	2.4769	2.5564	2.55116	2.52736	2.54716	2.53796	2.56252	2.49494	2.52849	2.52188	2.55219	2.56242	2.56351	2.53841	2.55178	2.56787	2.56687	2.5644	2.56213	2.50387	2.50018	2.4254	2.4788	2.45848	2.52313	2.46282	2.51177	2.52813	2.50581	2.53889	2.52495	2.54575	2.53255	2.54199	2.53973	2.52923	2.5102	2.53287
2.45669	2.46838	2.48622	2.47026	2.48619	2.51113	2.44733	2.50044	2.49606	2.47634	2.49141	2.50919	2.44518	2.49576	2.49761	2.46844	2.48704	2.47869	2.50097	2.45786	2.4799	2.46306	2.49872	2.50649	2.50666	2.47724	2.4982	2.51058	2.50959	2.49994	2.50603	2.46445	2.46329	2.41241	2.4489	2.4319	2.47749	2.44184	2.47151	2.48916	2.46444	2.49316	2.48622	2.49865	2.4895	2.49079	2.48421	2.48325	2.45779	2.48309
2.4817	2.49782	2.51829	2.50813	2.53164	2.55565	2.46855	2.54715	2.55281	2.51774	2.53056	2.56189	2.47608	2.54769	2.54246	2.50981	2.53155	2.52561	2.5579	2.48932	2.52393	2.50388	2.53395	2.55231	2.55878	2.5231	2.53019	2.55243	2.56025	2.55681	2.55739	2.50233	2.50161	2.42773	2.48473	2.4591	2.51136	2.47101	2.50879	2.53949	2.4976	2.5522	2.53074	2.54429	2.53395	2.53891	2.52644	2.53319	2.48341	2.52612
2.48953	2.50498	2.5499	2.51648	2.54981	2.59198	2.47469	2.58706	2.56757	2.53366	2.5468	2.59248	2.47273	2.58282	2.56632	2.5203	2.56314	2.54389	2.57622	2.5054	2.54191	2.51949	2.57061	2.57367	2.57485	2.54578	2.56707	2.58582	2.58437	2.56712	2.58576	2.50926	2.50668	2.42645	2.47468	2.44284	2.52704	2.46878	2.5115	2.53961	2.50096	2.54076	2.54326	2.55829	2.54256	2.54961	2.53793	2.53635	2.49876	2.54094
2.50363	2.51875	2.55774	2.53597	2.56261	2.60725	2.47703	2.58482	2.58975	2.54096	2.56588	2.60597	2.48175	2.59134	2.57257	2.53171	2.56799	2.54817	2.59876	2.50751	2.55125	2.53305	2.57796	2.59761	2.60253	2.55275	2.57955	2.59781	2.60992	2.59599	2.59867	2.52208	2.5306	2.43322	2.49182	2.46187	2.54155	2.4834	2.53347	2.56435	2.51721	2.57288	2.57004	2.59111	2.56858	2.57619	2.56489	2.5642	2.51149	2.55911
2.45011	2.46245	2.46876	2.45309	2.47025	2.48169	2.43279	2.48851	2.48122	2.46813	2.4683	2.48851	2.43795	2.47832	2.47919	2.45671	2.47159	2.46806	2.47656	2.44948	2.46473	2.44737	2.47725	2.48849	2.48304	2.46681	2.47606	2.48857	2.49049	2.48274	2.4842	2.45007	2.44624	2.40666	2.44551	2.41863	2.45988	2.4327	2.4569	2.46659	2.44832	2.47926	2.47278	2.48146	2.47454	2.47387	2.46887	2.46802	2.45257	2.47298
2.47588	2.5077	2.53584	2.50815	2.54037	2.596	2.45976	2.57414	2.57104	2.51866	2.53956	2.59593	2.45747	2.58247	2.56958	2.51427	2.55769	2.53386	2.58629	2.48819	2.53198	2.50402	2.55699	2.58355	2.58588	2.54347	2.5636	2.58374	2.5935	2.58053	2.58758	2.50421	2.50605	2.40566	2.46329	2.43742	2.52044	2.45852	2.51034	2.54234	2.49241	2.54479	2.55389	2.57183	2.55773	2.54933	2.5446	2.54498	2.49467	2.53803
2.42773	2.43893	2.44932	2.44384	2.45873	2.46251	2.42848	2.45346	2.46693	2.45414	2.45691	2.47011	2.42751	2.45765	2.46923	2.45001	2.45233	2.46823	2.46045	2.44217	2.45638	2.44654	2.45968	2.46935	2.46422	2.45932	2.45528	2.461	2.46481	2.46405	2.45904	2.44571	2.45418	2.40859	2.43582	2.41735	2.45461	2.42171	2.45214	2.46112	2.44428	2.46489	2.45196	2.46473	2.45933	2.45882	2.45789	2.46355	2.44556	2.4642
2.48771	2.49778	2.51508	2.50081	2.52297	2.54289	2.45912	2.53635	2.53965	2.50494	2.52619	2.54243	2.46345	2.53978	2.52889	2.49775	2.53082	2.51271	2.53544	2.48364	2.51147	2.49777	2.52914	2.53951	2.5367	2.52119	2.52797	2.53961	2.54255	2.53264	2.53815	2.49421	2.49299	2.4195	2.45737	2.44369	2.50709	2.45246	2.49609	2.51433	2.48631	2.53016	2.51903	2.53378	2.51598	2.52007	2.51511	2.51517	2.49222	2.51609
2.49959	2.51109	2.54273	2.52446	2.55175	2.58384	2.47873	2.56946	2.57064	2.5316	2.55179	2.58345	2.48682	2.57623	2.56797	2.52561	2.56015	2.55193	2.57144	2.49764	2.53778	2.52141	2.57139	2.57254	2.57595	2.54555	2.56226	2.582	2.57747	2.57736	2.57729	2.50887	2.51683	2.43089	2.47912	2.46915	2.52724	2.4764	2.52325	2.54595	2.50695	2.55195	2.54562	2.56526	2.55102	2.54916	2.54866	2.54115	2.50855	2.54714
2.4473	2.4639	2.46827	2.46729	2.49178	2.49591	2.43902	2.48388	2.48714	2.47699	2.48101	2.4996	2.44412	2.48481	2.49568	2.47049	2.48811	2.48679	2.48913	2.46377	2.47745	2.46853	2.49129	2.49573	2.4916	2.4865	2.48832	2.48751	2.49718	2.49179	2.49521	2.47204	2.47498	2.42157	2.45474	2.43746	2.47685	2.44333	2.47452	2.48346	2.46104	2.49916	2.49018	2.49623	2.49466	2.49214	2.49431	2.49419	2.46853	2.49286
2.46316	2.47797	2.48509	2.47646	2.49509	2.50472	2.45381	2.49244	2.50306	2.48388	2.48958	2.49978	2.4586	2.49213	2.49811	2.48473	2.49466	2.4914	2.4934	2.46421	2.49316	2.47883	2.49667	2.5033	2.49629	2.48973	2.49806	2.50084	2.50235	2.50689	2.49824	2.46532	2.47301	2.4146	2.45055	2.43982	2.48468	2.44845	2.47433	2.49138	2.47367	2.49745	2.49227	2.49571	2.48605	2.49568	2.48979	2.4907	2.46988	2.50137
2.44048	2.4449	2.44953	2.44138	2.45515	2.45848	2.42118	2.45919	2.46285	2.44667	2.4603	2.46806	2.42854	2.45298	2.45383	2.44473	2.45552	2.4568	2.45799	2.43965	2.45247	2.44386	2.45854	2.46319	2.46283	2.45338	2.45421	2.45381	2.46334	2.46414	2.46189	2.44329	2.43916	2.40276	2.4247	2.41096	2.44478	2.42135	2.4491	2.451	2.43402	2.46003	2.45383	2.45646	2.44809	2.45633	2.45755	2.45469	2.43722	2.45828
2.41965	2.42494	2.44067	2.4315	2.43795	2.45174	2.41551	2.44862	2.44391	2.43291	2.43398	2.44069	2.41915	2.43634	2.4405	2.43195	2.44215	2.43812	2.44066	2.41682	2.43402	2.42707	2.44146	2.44409	2.43776	2.43412	2.44316	2.4546	2.44348	2.43996	2.44458	2.42019	2.42302	2.39647	2.42007	2.40607	2.43793	2.41097	2.42415	2.43893	2.42192	2.43587	2.43655	2.44134	2.4436	2.43786	2.44159	2.44298	2.42626	2.43235
2.50865	2.5206	2.55938	2.52817	2.56778	2.61235	2.48325	2.59872	2.58499	2.54622	2.56634	2.61903	2.4868	2.60277	2.5956	2.53017	2.58072	2.56254	2.61279	2.51925	2.54859	2.52855	2.59099	2.60729	2.60542	2.5639	2.58517	2.61356	2.60955	2.59896	2.61695	2.53268	2.52967	2.43586	2.49347	2.46587	2.5496	2.48526	2.54176	2.56738	2.51606	2.57895	2.57038	2.59918	2.57716	2.57634	2.56498	2.56732	2.51908	2.55721
2.51398	2.53127	2.58338	2.54404	2.58638	2.64497	2.47965	2.62195	2.60683	2.55797	2.58027	2.64162	2.49147	2.6238	2.60643	2.54351	2.60605	2.57525	2.6411	2.51143	2.56456	2.53639	2.61565	2.62299	2.62463	2.57875	2.60733	2.6372	2.64104	2.62185	2.63397	2.54945	2.54496	2.43774	2.50264	2.47596	2.56904	2.49562	2.54907	2.58265	2.53416	2.59444	2.58387	2.61343	2.59251	2.59982	2.58143	2.57962	2.53266	2.57438
2.51346	2.53442	2.57281	2.54506	2.57677	2.63066	2.48722	2.62381	2.60886	2.55808	2.58011	2.63665	2.49115	2.62512	2.61373	2.54644	2.59526	2.58383	2.62262	2.52246	2.56978	2.54297	2.61077	2.62178	2.62263	2.58377	2.59892	2.64098	2.63621	2.61594	2.62881	2.53845	2.53603	2.43256	2.48833	2.46033	2.56027	2.48866	2.5343	2.57454	2.51671	2.58937	2.57652	2.60276	2.58635	2.59241	2.57769	2.57449	2.51985	2.5724
2.51581	2.52989	2.57472	2.54781	2.57796	2.63259	2.4845	2.61118	2.60285	2.55385	2.57768	2.63403	2.49099	2.6078	2.60641	2.54072	2.59901	2.56794	2.62486	2.51914	2.5664	2.53981	2.59849	2.61728	2.61911	2.57801	2.59815	2.64048	2.63757	2.62139	2.62487	2.54903	2.54359	2.4383	2.50107	2.47943	2.56637	2.48992	2.54442	2.57712	2.53884	2.59024	2.58135	2.61942	2.58754	2.59689	2.57802	2.57854	2.53165	2.57328
2.51746	2.5301	2.56699	2.53412	2.57741	2.63184	2.47297	2.61092	2.60283	2.54877	2.57899	2.63122	2.48553	2.60912	2.6017	2.53992	2.58886	2.57743	2.62417	2.51096	2.56297	2.53265	2.59934	2.61569	2.6175	2.568	2.59883	2.63043	2.63486	2.60966	2.62271	2.54057	2.53866	2.43004	2.49185	2.46602	2.55929	2.48456	2.53892	2.57297	2.52713	2.59038	2.57254	2.59706	2.57655	2.58504	2.57299	2.56756	2.52384	2.57374
2.51896	2.53662	2.57724	2.54366	2.58146	2.64747	2.48566	2.62513	2.61675	2.56043	2.58503	2.64558	2.48588	2.62014	2.61448	2.54513	2.59916	2.58403	2.63514	2.52192	2.56887	2.5386	2.60554	2.62627	2.63088	2.58142	2.61179	2.64457	2.64771	2.63093	2.63817	2.54681	2.53977	2.43456	2.49481	2.4659	2.56904	2.4908	2.54014	2.57435	2.5207	2.59205	2.58362	2.61366	2.5892	2.59525	2.58263	2.58086	2.52204	2.57919
2.49781	2.51521	2.54579	2.51384	2.54385	2.58363	2.48047	2.58072	2.57529	2.52703	2.55025	2.58589	2.47943	2.57335	2.5635	2.52178	2.55673	2.54383	2.58349	2.50383	2.5304	2.51283	2.55989	2.56957	2.57563	2.54477	2.5587	2.58037	2.58231	2.56944	2.57589	2.51152	2.51371	2.42736	2.48202	2.44954	2.53127	2.47505	2.51755	2.54575	2.50498	2.55604	2.54823	2.56594	2.55712	2.55456	2.55051	2.54392	2.50642	2.537
2.50879	2.53048	2.56856	2.53853	2.56802	2.62189	2.48475	2.59937	2.59614	2.54181	2.56954	2.61412	2.48035	2.60463	2.59122	2.53843	2.58238	2.56956	2.60726	2.51913	2.55316	2.53092	2.58898	2.60702	2.6017	2.56268	2.58738	2.61929	2.62031	2.59529	2.62395	2.53717	2.54029	2.43451	2.49575	2.46424	2.5574	2.48704	2.53781	2.56755	2.51706	2.57847	2.565	2.59	2.57244	2.58509	2.57328	2.56526	2.52127	2.57042
2.47985	2.49519	2.50704	2.50463	2.51722	2.54687	2.46639	2.52369	2.53447	2.49901	2.51146	2.53266	2.47099	2.52418	2.52993	2.49678	2.52113	2.5142	2.53098	2.48338	2.50608	2.49556	2.52291	2.53493	2.52787	2.51522	2.52011	2.52457	2.53552	2.53052	2.52675	2.49946	2.50207	2.43344	2.48079	2.45384	2.51474	2.46629	2.50236	2.52411	2.49353	2.52279	2.5159	2.52713	2.52004	2.514	2.51361	2.51172	2.49708	2.519
2.5066	2.52524	2.54801	2.52404	2.55554	2.60186	2.48017	2.58401	2.57963	2.53692	2.55495	2.61168	2.47852	2.589	2.58447	2.52471	2.55995	2.54707	2.5949	2.50819	2.53224	2.51412	2.57153	2.58423	2.58411	2.54852	2.56741	2.59274	2.59839	2.58242	2.5869	2.51727	2.51635	2.42706	2.48894	2.4578	2.53306	2.47673	2.52425	2.55519	2.51039	2.55889	2.55513	2.5718	2.557	2.56364	2.55324	2.54938	2.51191	2.54648
2.5147	2.52936	2.57569	2.54079	2.57601	2.63901	2.48058	2.62054	2.60368	2.54865	2.57523	2.64263	2.4861	2.62447	2.60658	2.53452	2.60316	2.56955	2.63314	2.51686	2.54928	2.52433	2.60655	2.61697	2.61759	2.57041	2.60373	2.62477	2.63019	2.61215	2.63278	2.53019	2.52932	2.43419	2.4888	2.46387	2.55	2.48115	2.53216	2.56906	2.51848	2.58176	2.57533	2.60703	2.58463	2.58901	2.57804	2.57319	2.52502	2.56571
2.5136	2.53317	2.57766	2.54184	2.57916	2.64063	2.48275	2.6186	2.61834	2.54547	2.58101	2.63662	2.48508	2.63739	2.60188	2.53266	2.60302	2.56858	2.63368	2.526	2.55262	2.52663	2.61073	2.62257	2.61817	2.57048	2.60286	2.61722	2.62914	2.6065	2.62922	2.53832	2.54593	2.43677	2.49043	2.46725	2.56108	2.4887	2.5427	2.5709	2.529	2.58119	2.5689	2.60136	2.57954	2.58565	2.57872	2.57534	2.52466	2.57649
2.51648	2.53672	2.57068	2.5443	2.57601	2.62832	2.4875	2.60816	2.60269	2.55423	2.57245	2.62191	2.49181	2.61238	2.59886	2.53765	2.59552	2.56961	2.62249	2.5218	2.55546	2.53731	2.59614	2.61508	2.61257	2.56486	2.59238	2.61344	2.62607	2.61117	2.6215	2.54502	2.54259	2.43771	2.50284	2.47927	2.55412	2.49483	2.54487	2.56884	2.53374	2.58569	2.57562	2.60294	2.58193	2.58618	2.57516	2.58172	2.53657	2.57287
2.52442	2.54081	2.59022	2.55389	2.59324	2.66347	2.49006	2.63567	2.6228	2.56678	2.59213	2.64475	2.49508	2.6419	2.61094	2.54867	2.61892	2.57035	2.64758	2.52872	2.56682	2.5423	2.62007	2.63888	2.63883	2.58868	2.6164	2.65205	2.65923	2.63436	2.65228	2.55763	2.55403	2.43927	2.50733	2.47107	2.57521	2.4936	2.54762	2.5815	2.53462	2.59567	2.58818	2.62479	2.59718	2.60059	2.59025	2.58736	2.54014	2.58625
2.50895	2.53392	2.55745	2.54273	2.56631	2.60705	2.49059	2.5783	2.59157	2.54831	2.56018	2.6076	2.48559	2.58699	2.5865	2.5418	2.58016	2.56581	2.59507	2.52215	2.55792	2.54484	2.58041	2.59245	2.5945	2.56982	2.57499	2.60812	2.60539	2.59727	2.60836	2.53503	2.53472	2.43819	2.5	2.47089	2.54821	2.48434	2.53164	2.56152	2.52526	2.57587	2.57051	2.59067	2.57485	2.581	2.57469	2.57307	2.5225	2.56715
2.50331	2.51992	2.54056	2.52757	2.55445	2.57776	2.47596	2.56025	2.56132	2.52644	2.54523	2.57295	2.47504	2.56231	2.55938	2.51764	2.5587	2.54339	2.56255	2.49645	2.53366	2.52261	2.56529	2.5671	2.56865	2.54842	2.55283	2.57347	2.57174	2.57947	2.57792	2.52686	2.52293	2.43236	2.49173	2.46805	2.53565	2.4814	2.52295	2.54414	2.51223	2.55771	2.55393	2.56822	2.55592	2.55703	2.5486	2.55284	2.51511	2.54885
2.5158	2.52561	2.56916	2.55234	2.58599	2.62711	2.48676	2.60761	2.60547	2.55817	2.57707	2.62472	2.48781	2.61837	2.59923	2.53967	2.60041	2.57221	2.62769	2.52138	2.55376	2.53484	2.60682	2.6287	2.61938	2.57665	2.59809	2.6246	2.62975	2.61629	2.62704	2.53683	2.53855	2.43695	2.49549	2.46994	2.56047	2.48606	2.54209	2.56394	2.53464	2.58265	2.57039	2.59222	2.57387	2.57891	2.56659	2.56664	2.53246	2.56148
2.5187	2.53242	2.57234	2.55126	2.57423	2.62324	2.48379	2.59925	2.59805	2.55014	2.57221	2.62184	2.4891	2.59891	2.59337	2.54561	2.58768	2.57448	2.60643	2.52357	2.55637	2.538	2.59185	2.60092	2.60276	2.57818	2.58885	2.62269	2.61767	2.60635	2.63159	2.54348	2.54266	2.44258	2.50026	2.47516	2.55608	2.48978	2.54046	2.56645	2.52674	2.57987	2.57016	2.59884	2.57765	2.58964	2.57489	2.57624	2.52332	2.57418
2.49413	2.52739	2.54657	2.52821	2.54793	2.58768	2.49006	2.56786	2.56851	2.53667	2.54296	2.58593	2.47728	2.56913	2.56704	2.53226	2.55982	2.55629	2.58547	2.50544	2.54288	2.52552	2.56228	2.57978	2.57869	2.55547	2.56002	2.58705	2.5839	2.57622	2.58544	2.51941	2.51831	2.43881	2.49224	2.46878	2.52912	2.48026	2.52141	2.54795	2.51439	2.56519	2.55379	2.57974	2.56367	2.57324	2.55819	2.55671	2.51377	2.54647
2.51763	2.53013	2.57847	2.544	2.58552	2.64174	2.48127	2.61886	2.61161	2.55059	2.57858	2.64203	2.49027	2.62566	2.61602	2.54028	2.59016	2.5714	2.63068	2.52426	2.55682	2.53765	2.60029	2.61695	2.62109	2.58038	2.59682	2.62176	2.62701	2.60766	2.63139	2.53316	2.53629	2.43381	2.49659	2.46726	2.55735	2.49013	2.53742	2.56252	2.53138	2.57914	2.57257	2.60088	2.57485	2.59001	2.57659	2.56803	2.5227	2.5666
2.51652	2.52014	2.56915	2.53806	2.56988	2.60734	2.47773	2.60039	2.59057	2.54344	2.56488	2.61266	2.48679	2.60307	2.59109	2.53572	2.5856	2.56171	2.60503	2.51772	2.54464	2.52729	2.58546	2.59256	2.59269	2.56883	2.58241	2.61227	2.59533	2.58597	2.60918	2.53121	2.52832	2.43296	2.48535	2.45978	2.54477	2.47959	2.53294	2.55385	2.51632	2.56929	2.56224	2.5885	2.56922	2.58213	2.56987	2.56186	2.52232	2.55835
2.51427	2.53698	2.55501	2.54283	2.56377	2.60318	2.48612	2.59565	2.58254	2.54405	2.56025	2.61132	2.49019	2.59097	2.58825	2.54355	2.58158	2.57119	2.6008	2.51722	2.55526	2.53383	2.58528	2.59934	2.59649	2.56917	2.56617	2.61335	2.59958	2.59261	2.60229	2.53251	2.53792	2.43222	2.49912	2.46589	2.55089	2.48897	2.54303	2.55397	2.5224	2.57109	2.56794	2.58664	2.58046	2.5753	2.57035	2.57545	2.52222	2.56084
2.51276	2.52028	2.56807	2.53401	2.57658	2.62361	2.48771	2.60973	2.60901	2.55001	2.57976	2.63133	2.48645	2.61463	2.61008	2.53242	2.59073	2.56855	2.62747	2.5124	2.55765	2.52453	2.60189	2.60622	2.60212	2.57331	2.59119	2.62262	2.61737	2.60133	2.63247	2.53531	2.53037	2.43122	2.48508	2.45972	2.55516	2.48291	2.52921	2.56457	2.51605	2.57354	2.57221	2.59565	2.57586	2.58201	2.57797	2.5718	2.51388	2.56566
2.51281	2.53121	2.55605	2.53021	2.56619	2.61195	2.47789	2.59865	2.58637	2.54303	2.5664	2.60332	2.48254	2.59226	2.58854	2.52442	2.584	2.55668	2.59182	2.50797	2.54263	2.531	2.58701	2.59585	2.59576	2.56687	2.57862	2.61369	2.60969	2.59481	2.60671	2.52797	2.53019	2.4325	2.48745	2.46733	2.54818	2.48102	2.53386	2.56521	2.51797	2.56915	2.56321	2.5932	2.56828	2.58462	2.56772	2.56587	2.52823	2.56914
2.52565	2.52876	2.5676	2.55421	2.58775	2.61359	2.48777	2.59648	2.60124	2.55783	2.57246	2.61195	2.48392	2.60073	2.58495	2.55163	2.60076	2.56544	2.6113	2.51982	2.56518	2.54826	2.60876	2.61163	2.62244	2.58122	2.59993	2.62046	2.62985	2.61428	2.61139	2.55064	2.54611	2.45181	2.49457	2.48601	2.55616	2.49781	2.53993	2.56201	2.52974	2.57751	2.56714	2.58306	2.56786	2.58163	2.5565	2.56526	2.5225	2.57105
2.51003	2.51559	2.55922	2.53811	2.55309	2.59883	2.48039	2.59105	2.5871	2.53577	2.55028	2.61013	2.48601	2.5934	2.58973	2.53205	2.5751	2.55815	2.5988	2.51595	2.54273	2.52985	2.57617	2.59193	2.58928	2.55721	2.57009	2.60419	2.59331	2.58302	2.60358	2.52986	2.52698	2.43638	2.47776	2.47043	2.54689	2.47956	2.52545	2.54189	2.51529	2.55699	2.54981	2.57772	2.55545	2.56147	2.55227	2.54465	2.51422	2.54538
2.48593	2.49434	2.51408	2.50962	2.51939	2.55543	2.46479	2.52601	2.54354	2.5048	2.5209	2.54385	2.46624	2.53374	2.5352	2.50659	2.52588	2.52165	2.54458	2.48591	2.51551	2.49543	2.53508	2.53857	2.53708	2.51627	2.52562	2.54294	2.5426	2.54064	2.53121	2.50854	2.50158	2.44006	2.46843	2.45709	2.51145	2.47454	2.50221	2.51528	2.49201	2.52049	2.51753	2.52539	2.51649	2.52203	2.51496	2.52032	2.49212	2.52551
2.42731	2.43738	2.43513	2.43026	2.43613	2.44485	2.41842	2.43771	2.43917	2.4307	2.43114	2.4401	2.4204	2.435	2.43987	2.42944	2.43811	2.43876	2.44408	2.4284	2.43552	2.42638	2.44305	2.44241	2.4438	2.43354	2.43786	2.4478	2.44219	2.44733	2.44405	2.43342	2.43351	2.39512	2.4226	2.41249	2.44202	2.41798	2.43287	2.43762	2.42778	2.43477	2.43568	2.45232	2.44183	2.43662	2.44786	2.44543	2.42712	2.44078
2.47997	2.48832	2.51763	2.50815	2.5354	2.54178	2.46601	2.53103	2.53441	2.512	2.52405	2.53087	2.46838	2.53376	2.52709	2.50743	2.52656	2.52895	2.53451	2.49624	2.51971	2.50649	2.53359	2.53985	2.53738	2.52368	2.52696	2.53326	2.54084	2.54505	2.53405	2.507	2.50346	2.44287	2.47428	2.46366	2.5111	2.47971	2.50911	2.51585	2.49899	2.52052	2.51782	2.53157	2.52271	2.52753	2.51679	2.51948	2.49282	2.52267
2.50571	2.51153	2.54158	2.51174	2.54257	2.57964	2.47254	2.56386	2.56033	2.52418	2.53901	2.56742	2.48368	2.56796	2.5616	2.51547	2.54753	2.54378	2.56891	2.49787	2.52152	2.5104	2.56163	2.56417	2.5585	2.53656	2.54739	2.57479	2.56631	2.56225	2.56906	2.5223	2.50981	2.43572	2.47917	2.46909	2.53091	2.47559	2.51703	2.53357	2.50787	2.54944	2.53188	2.55412	2.54278	2.54215	2.53506	2.53834	2.51021	2.54361
2.50325	2.51478	2.54519	2.52176	2.54837	2.5826	2.47242	2.56567	2.56422	2.52817	2.54729	2.57873	2.48102	2.57274	2.56187	2.53668	2.56308	2.55706	2.56431	2.51198	2.53913	2.53261	2.55629	2.568	2.57182	2.552	2.55041	2.5648	2.56871	2.56983	2.57208	2.53925	2.54405	2.4435	2.48756	2.47081	2.54487	2.48844	2.52782	2.53172	2.51837	2.56214	2.53489	2.56359	2.55081	2.56578	2.5513	2.54798	2.50003	2.53996
2.49989	2.51512	2.56109	2.52994	2.56653	2.60009	2.47739	2.59736	2.59204	2.54084	2.55523	2.60489	2.48636	2.59976	2.58557	2.53431	2.58577	2.57316	2.59016	2.50535	2.55223	2.53397	2.58978	2.59099	2.60258	2.56574	2.58132	2.61632	2.59862	2.60125	2.62111	2.53849	2.53688	2.4364	2.48837	2.47043	2.55101	2.48462	2.52769	2.55232	2.52102	2.57472	2.5547	2.58201	2.55956	2.57019	2.56679	2.55406	2.51795	2.55689
2.50538	2.52137	2.55273	2.53327	2.56237	2.59359	2.48085	2.58162	2.58198	2.53894	2.55642	2.5983	2.48263	2.58709	2.5758	2.53	2.57962	2.55718	2.5858	2.50723	2.54223	2.5311	2.57277	2.5823	2.58915	2.56147	2.56842	2.59605	2.58785	2.58851	2.60347	2.52844	2.52548	2.43351	2.48386	2.4626	2.53947	2.48449	2.52751	2.53908	2.51283	2.56116	2.55896	2.5809	2.56691	2.56584	2.55959	2.55381	2.51904	2.54645
2.51861	2.51826	2.55733	2.53717	2.56682	2.60991	2.48559	2.59944	2.58979	2.54367	2.57179	2.61421	2.49044	2.59617	2.58587	2.53749	2.58692	2.56358	2.60613	2.51287	2.54529	2.52549	2.58506	2.59944	2.60526	2.56151	2.58135	2.61375	2.60737	2.60189	2.60995	2.53734	2.53077	2.44191	2.49123	2.47495	2.55129	2.48566	2.53958	2.56242	2.52694	2.5824	2.56303	2.59332	2.57975	2.57375	2.56471	2.56623	2.52689	2.55605
2.51016	2.52448	2.56825	2.52775	2.55865	2.61188	2.4833	2.59924	2.592	2.54107	2.56329	2.62061	2.48434	2.60639	2.59815	2.53617	2.58479	2.56715	2.61393	2.5151	2.55037	2.52816	2.58423	2.59503	2.59328	2.56358	2.57885	2.6072	2.60105	2.59431	2.61434	2.52951	2.5256	2.42941	2.48979	2.45466	2.55164	2.48521	2.53154	2.55437	2.50943	2.56972	2.56746	2.58754	2.57418	2.57265	2.56563	2.55958	2.51987	2.55645
2.51889	2.53307	2.56728	2.54391	2.57363	2.61562	2.48546	2.60776	2.59386	2.54635	2.56117	2.60742	2.48646	2.60279	2.59059	2.53881	2.58581	2.56239	2.60774	2.51824	2.55482	2.53389	2.5947	2.59983	2.59881	2.56036	2.57927	2.60845	2.60004	2.5908	2.61125	2.53378	2.5336	2.43802	2.49441	2.47039	2.54842	2.47944	2.53963	2.55853	2.52818	2.5831	2.57227	2.60278	2.58016	2.58236	2.57049	2.57077	2.52855	2.55941
2.5118	2.51735	2.55909	2.53465	2.56321	2.6119	2.48182	2.60133	2.58311	2.54051	2.56049	2.6027	2.48777	2.5974	2.58719	2.52395	2.58026	2.55849	2.60556	2.50107	2.53866	2.51749	2.5862	2.58884	2.57951	2.55077	2.57807	2.59972	2.5951	2.57301	2.59551	2.51575	2.51589	2.42678	2.48437	2.45395	2.53745	2.47539	2.52093	2.54244	2.51453	2.56399	2.55729	2.57668	2.56735	2.56368	2.55682	2.55172	2.51842	2.54534
2.4967	2.52426	2.54392	2.52944	2.55345	2.58464	2.47313	2.57971	2.5651	2.54143	2.55109	2.58729	2.48702	2.57678	2.57165	2.54127	2.56706	2.56902	2.58702	2.51054	2.56029	2.54174	2.57026	2.5821	2.58549	2.55326	2.56613	2.587	2.58477	2.57611	2.58992	2.52762	2.52708	2.44073	2.48527	2.47142	2.53712	2.47941	2.53244	2.55033	2.51397	2.56212	2.55655	2.57157	2.56607	2.55849	2.55448	2.56151	2.50361	2.54769
2.51482	2.52561	2.56455	2.54596	2.58083	2.60653	2.48283	2.60486	2.57942	2.56162	2.56463	2.60656	2.4911	2.59178	2.58608	2.55392	2.58796	2.58048	2.59545	2.52025	2.57695	2.55948	2.59694	2.5921	2.59908	2.58041	2.58251	2.60883	2.60701	2.60216	2.60255	2.54933	2.55897	2.44723	2.49174	2.48128	2.56539	2.49762	2.55177	2.57425	2.52931	2.58577	2.58164	2.61272	2.58193	2.58766	2.58165	2.58173	2.52288	2.57363
2.5058	2.52053	2.54419	2.53151	2.54013	2.57883	2.48061	2.57504	2.55937	2.52959	2.54493	2.57413	2.47965	2.5716	2.56493	2.52041	2.56462	2.5344	2.57467	2.51014	2.52847	2.51859	2.56664	2.56209	2.56387	2.54731	2.55896	2.58214	2.57521	2.56246	2.58392	2.52833	2.52193	2.43657	2.48647	2.46388	2.54208	2.47902	2.524	2.53755	2.50773	2.55416	2.55108	2.57175	2.55912	2.56378	2.55194	2.55354	2.51939	2.54627
2.48709	2.5042	2.51598	2.50191	2.52066	2.5493	2.45704	2.53553	2.53387	2.50881	2.51595	2.55298	2.47075	2.53891	2.53546	2.51582	2.53163	2.5287	2.53805	2.50615	2.52416	2.51509	2.53	2.53855	2.54631	2.52962	2.52519	2.53935	2.54009	2.54182	2.54012	2.49544	2.4958	2.4326	2.4758	2.46019	2.49958	2.46242	2.49778	2.51291	2.49878	2.53527	2.51877	2.53979	2.52231	2.53412	2.52313	2.52142	2.48874	2.51956
2.51258	2.53188	2.56623	2.53743	2.56347	2.60102	2.48115	2.59662	2.57839	2.54082	2.55474	2.60036	2.48342	2.59389	2.57602	2.53497	2.5872	2.56143	2.59746	2.51562	2.53418	2.53547	2.58956	2.591	2.59721	2.56851	2.57731	2.60017	2.60538	2.59686	2.61647	2.5347	2.5436	2.43882	2.4882	2.47018	2.5513	2.48261	2.53127	2.55354	2.52053	2.5741	2.56587	2.58911	2.57714	2.57928	2.5602	2.56944	2.52522	2.55754
2.5164	2.51885	2.54532	2.53067	2.5553	2.57611	2.47509	2.57936	2.56687	2.53795	2.54987	2.58118	2.48102	2.57631	2.56821	2.54497	2.55984	2.57029	2.57405	2.51133	2.56192	2.54928	2.56766	2.57645	2.57857	2.55764	2.55965	2.57116	2.5831	2.57876	2.57635	2.53203	2.53626	2.44116	2.48777	2.47695	2.54082	2.48255	2.52675	2.54818	2.5186	2.57072	2.54887	2.57464	2.54822	2.56385	2.55372	2.55296	2.50805	2.54689
2.50099	2.51287	2.52401	2.51161	2.53046	2.55658	2.47558	2.54298	2.53786	2.51294	2.52042	2.55156	2.47733	2.54397	2.54167	2.50955	2.53296	2.51628	2.54961	2.49746	2.51483	2.50659	2.54418	2.54757	2.54512	2.52705	2.53202	2.54516	2.54815	2.55004	2.54977	2.51075	2.50994	2.42962	2.48414	2.461	2.51831	2.47225	2.50698	2.5307	2.5089	2.54772	2.53113	2.54132	2.53248	2.53557	2.52469	2.53136	2.50309	2.531
2.5074	2.52915	2.55174	2.53786	2.56255	2.59132	2.47618	2.58014	2.58178	2.5454	2.56412	2.58405	2.48675	2.57517	2.57506	2.53411	2.57514	2.55815	2.58695	2.51727	2.54428	2.53261	2.57882	2.58266	2.58734	2.56103	2.57641	2.59694	2.59619	2.58759	2.59721	2.52455	2.52569	2.43125	2.49353	2.46369	2.53615	2.48152	2.52717	2.55647	2.52154	2.57086	2.56989	2.58437	2.57176	2.58078	2.56665	2.56095	2.51904	2.5634
2.511	2.52371	2.55125	2.52142	2.5542	2.59868	2.48041	2.58305	2.57145	2.5373	2.55316	2.59703	2.48536	2.58299	2.57581	2.53075	2.57104	2.55275	2.58934	2.50791	2.53797	2.5224	2.57023	2.58118	2.57846	2.55393	2.56664	2.5946	2.58725	2.58009	2.58121	2.53169	2.53226	2.43912	2.49835	2.46899	2.54399	2.49236	2.53567	2.55619	2.5278	2.57776	2.56306	2.58339	2.56388	2.58003	2.56325	2.56218	2.52637	2.55798
2.50649	2.52575	2.55743	2.53177	2.55873	2.61098	2.47847	2.58677	2.5856	2.54021	2.55762	2.60161	2.49598	2.59023	2.57714	2.53825	2.57143	2.56092	2.59129	2.51716	2.54957	2.52638	2.57668	2.58521	2.59367	2.56147	2.56837	2.58954	2.59628	2.58965	2.58832	2.53662	2.53859	2.43905	2.50362	2.4781	2.55084	2.49165	2.5383	2.55508	2.52992	2.57294	2.56003	2.57948	2.57225	2.57619	2.55999	2.56076	2.53267	2.55641
2.51256	2.52399	2.56722	2.53469	2.56094	2.60965	2.48145	2.59757	2.5934	2.55127	2.56663	2.60193	2.49564	2.58535	2.58383	2.53845	2.57773	2.56106	2.59458	2.49796	2.55493	2.53565	2.58223	2.59185	2.59479	2.56167	2.58395	2.61511	2.60221	2.59197	2.60479	2.53543	2.53616	2.436	2.49967	2.46962	2.54916	2.4918	2.53733	2.56476	2.5216	2.57276	2.5695	2.59332	2.57611	2.57711	2.5741	2.56944	2.52013	2.56216
2.51244	2.52506	2.58182	2.5423	2.58757	2.63739	2.48628	2.62514	2.60537	2.55051	2.58051	2.62943	2.49228	2.6262	2.60472	2.53865	2.60162	2.57011	2.62237	2.51687	2.56056	2.53742	2.60405	2.62126	2.6111	2.5718	2.60243	2.62197	2.62326	2.60999	2.62179	2.54378	2.545	2.43504	2.49409	2.47167	2.56106	2.4905	2.53843	2.57106	2.52347	2.57308	2.5795	2.60677	2.58268	2.58357	2.58711	2.57591	2.53065	2.57187
2.48984	2.50993	2.52541	2.51494	2.53631	2.5566	2.46923	2.5461	2.55008	2.51986	2.53136	2.5488	2.48262	2.54619	2.55341	2.51868	2.54182	2.53595	2.54941	2.49877	2.52549	2.51657	2.54446	2.55617	2.55403	2.53818	2.53765	2.55097	2.55303	2.54858	2.55111	2.51931	2.51455	2.43866	2.47977	2.47065	2.52432	2.47922	2.51785	2.52875	2.51143	2.53464	2.52922	2.54826	2.54142	2.54219	2.52684	2.53023	2.50282	2.52924
2.50773	2.51951	2.55805	2.53607	2.56629	2.59821	2.47101	2.5871	2.58118	2.54268	2.55673	2.58619	2.48472	2.5819	2.57837	2.53614	2.57327	2.55374	2.5863	2.50537	2.54352	2.53297	2.58041	2.58238	2.58689	2.5586	2.57238	2.58757	2.58791	2.58001	2.5875	2.52926	2.53081	2.43978	2.49443	2.47687	2.54438	2.49241	2.53434	2.54931	2.52575	2.56113	2.56888	2.58315	2.57526	2.57126	2.55624	2.56093	2.5203	2.55008
2.51789	2.53662	2.57376	2.54888	2.58427	2.63013	2.48218	2.61342	2.60754	2.55655	2.57165	2.626	2.49555	2.62007	2.59414	2.54127	2.59583	2.56394	2.61883	2.51852	2.55394	2.53177	2.60782	2.60615	2.61091	2.57758	2.59569	2.62134	2.61834	2.61286	2.62592	2.53966	2.54705	2.4412	2.49268	2.46942	2.55969	2.49117	2.53641	2.57115	2.51968	2.57063	2.57577	2.60032	2.58164	2.58648	2.57752	2.57616	2.52653	2.5749
2.43939	2.45154	2.4443	2.44427	2.45627	2.45362	2.4282	2.4617	2.45324	2.45038	2.45208	2.4565	2.42855	2.45326	2.45233	2.44521	2.45544	2.44925	2.45122	2.44237	2.44581	2.43551	2.46265	2.46164	2.45881	2.45372	2.45334	2.46249	2.46362	2.46533	2.46207	2.44083	2.44392	2.4047	2.43885	2.41732	2.44858	2.42803	2.44934	2.45908	2.43732	2.45804	2.45632	2.46619	2.45708	2.46138	2.45442	2.45043	2.43812	2.45064
2.51995	2.52907	2.56965	2.5434	2.5828	2.62014	2.49061	2.60653	2.59972	2.55758	2.5706	2.60919	2.49742	2.59825	2.5946	2.54757	2.58513	2.56504	2.60901	2.52033	2.56263	2.54531	2.59259	2.59968	2.60373	2.57697	2.58432	2.60356	2.60772	2.60867	2.61475	2.53721	2.53859	2.43414	2.48786	2.47118	2.55806	2.48236	2.53904	2.56384	2.52199	2.57755	2.5735	2.59447	2.57559	2.58103	2.57378	2.57403	2.5356	2.5653
2.5176	2.52932	2.57443	2.54149	2.58479	2.61695	2.48372	2.6061	2.59806	2.55083	2.56906	2.61776	2.48647	2.60702	2.59656	2.53545	2.58708	2.55894	2.60856	2.51456	2.54535	2.53401	2.58886	2.60023	2.60574	2.57889	2.58523	2.60297	2.60604	2.60172	2.61445	2.52242	2.52623	2.42948	2.48634	2.46862	2.54465	2.47797	2.52728	2.56029	2.52349	2.57123	2.56909	2.5996	2.57813	2.57741	2.56384	2.56915	2.53019	2.56463
2.49877	2.49931	2.5297	2.50588	2.52951	2.56687	2.46813	2.56014	2.55489	2.51909	2.53442	2.56834	2.47921	2.55106	2.54813	2.51358	2.54945	2.5305	2.55597	2.49088	2.51626	2.5103	2.54916	2.55081	2.55773	2.53756	2.5432	2.55759	2.55674	2.55381	2.55853	2.50249	2.50284	2.43091	2.4681	2.45383	2.52264	2.46726	2.50963	2.53363	2.49615	2.53914	2.53683	2.55817	2.53919	2.54801	2.53637	2.53533	2.50407	2.53372
2.51653	2.52119	2.56796	2.53241	2.57277	2.61812	2.47787	2.60285	2.5863	2.54566	2.56412	2.60405	2.49005	2.6005	2.58172	2.53648	2.58618	2.55965	2.60101	2.50388	2.5479	2.53251	2.59712	2.58806	2.59838	2.56225	2.58264	2.61031	2.60009	2.59203	2.61202	2.5334	2.53457	2.43762	2.50089	2.46836	2.54945	2.48644	2.53314	2.55662	2.52412	2.57575	2.56528	2.58845	2.56584	2.57264	2.56695	2.55729	2.52253	2.55644
2.50599	2.52102	2.56957	2.52963	2.57163	2.61677	2.48298	2.59697	2.58775	2.54016	2.56064	2.60487	2.48813	2.59739	2.59152	2.53351	2.58112	2.55973	2.6003	2.50796	2.54528	2.52683	2.58607	2.599	2.60263	2.56151	2.58816	2.59983	2.60027	2.58878	2.60342	2.53086	2.52811	2.43395	2.49035	2.47041	2.54253	2.48097	2.52763	2.5578	2.52022	2.56929	2.57004	2.59302	2.57228	2.57881	2.56677	2.56807	2.52867	2.56207
2.51311	2.5208	2.57144	2.53491	2.57318	2.63023	2.48281	2.61383	2.60253	2.54612	2.57542	2.62138	2.48869	2.59896	2.5962	2.5273	2.58645	2.56221	2.60891	2.50283	2.55329	2.5316	2.59455	2.60163	2.60442	2.5639	2.5877	2.61333	2.61275	2.60363	2.62156	2.53812	2.53257	2.4327	2.49412	2.46406	2.54925	2.48693	2.53205	2.56328	2.51592	2.56847	2.56921	2.59718	2.57669	2.57114	2.56766	2.5662	2.52058	2.5654
2.50434	2.5036	2.53984	2.51404	2.54349	2.57306	2.4752	2.56467	2.54975	2.51962	2.53868	2.55823	2.46961	2.55374	2.55471	2.50412	2.54962	2.5335	2.55862	2.49771	2.51981	2.51046	2.54839	2.55993	2.55885	2.53761	2.54876	2.56416	2.56948	2.55832	2.56299	2.5059	2.50573	2.42617	2.47343	2.45505	2.5159	2.46472	2.51094	2.52441	2.50874	2.54028	2.53519	2.54705	2.53785	2.53846	2.53316	2.52946	2.5141	2.5322
2.49965	2.48266	2.55853	2.52465	2.55308	2.58534	2.45048	2.58183	2.56761	2.53489	2.53719	2.58885	2.47633	2.57381	2.56372	2.52665	2.57033	2.54394	2.57456	2.46636	2.53908	2.51729	2.56611	2.57473	2.57707	2.53473	2.55738	2.58066	2.57853	2.57273	2.58487	2.54256	2.54248	2.44821	2.49575	2.48484	2.54593	2.49337	2.54066	2.56334	2.52677	2.56819	2.56135	2.5799	2.56081	2.56175	2.56311	2.55647	2.51661	2.56594
2.43805	2.44648	2.45104	2.44765	2.45361	2.46239	2.43287	2.45784	2.4673	2.45193	2.45111	2.46656	2.43183	2.45127	2.46413	2.44361	2.4567	2.45621	2.46579	2.4455	2.45633	2.44159	2.45644	2.45897	2.46198	2.44946	2.45596	2.46528	2.46129	2.46218	2.46432	2.44534	2.44358	2.40197	2.43042	2.41825	2.45091	2.43	2.44912	2.45772	2.43969	2.4566	2.45672	2.45822	2.45274	2.45225	2.45589	2.45361	2.44603	2.46099
2.5096	2.50455	2.55345	2.52095	2.54639	2.58289	2.46049	2.57144	2.56516	2.5414	2.53935	2.57478	2.4784	2.57089	2.55268	2.53428	2.56688	2.54081	2.57822	2.49908	2.54033	2.52881	2.57544	2.56632	2.57053	2.54338	2.55605	2.58011	2.5755	2.57345	2.57504	2.52316	2.52753	2.44734	2.4828	2.47228	2.53417	2.48182	2.52716	2.5525	2.52515	2.56084	2.54904	2.56566	2.54778	2.5488	2.54937	2.54069	2.50897	2.55433
2.50318	2.51569	2.55878	2.53383	2.55981	2.59438	2.47775	2.58459	2.58687	2.54091	2.55227	2.6019	2.48893	2.59519	2.58601	2.53391	2.58039	2.54864	2.59508	2.50815	2.54608	2.52532	2.57271	2.58414	2.58382	2.55803	2.56867	2.5938	2.59308	2.58564	2.59931	2.52615	2.532	2.43598	2.48501	2.47253	2.54596	2.48694	2.52635	2.55221	2.52307	2.55966	2.56085	2.5827	2.56388	2.57309	2.56232	2.55975	2.52089	2.5461
2.50635	2.51978	2.5689	2.53574	2.55614	2.60161	2.47758	2.58861	2.58353	2.54606	2.5531	2.60742	2.48796	2.59291	2.58245	2.53493	2.57816	2.54701	2.59776	2.50796	2.54345	2.5281	2.5734	2.59058	2.59793	2.56569	2.5769	2.60199	2.59867	2.58934	2.60641	2.51825	2.52195	2.4309	2.48142	2.46493	2.53906	2.47495	2.52385	2.55124	2.51471	2.56192	2.56314	2.57997	2.56228	2.56908	2.55653	2.55639	2.51444	2.54438
2.50239	2.51282	2.53083	2.51685	2.53359	2.56476	2.47714	2.55717	2.55462	2.51082	2.53194	2.57663	2.47236	2.56206	2.55998	2.51743	2.54107	2.53513	2.56216	2.5027	2.52715	2.51231	2.5517	2.55506	2.55147	2.5373	2.5399	2.57294	2.55893	2.55495	2.56306	2.50911	2.50523	2.42535	2.47245	2.4547	2.52257	2.46937	2.51245	2.53493	2.50046	2.53876	2.53294	2.55057	2.53768	2.54828	2.54074	2.54001	2.50394	2.53037
2.46457	2.47384	2.47918	2.46632	2.4824	2.49862	2.44581	2.49005	2.49417	2.47489	2.49124	2.50533	2.45731	2.48649	2.49871	2.47694	2.48099	2.49581	2.50154	2.47215	2.48456	2.47019	2.49014	2.49784	2.49524	2.48214	2.48398	2.49811	2.49506	2.49579	2.49509	2.47551	2.47714	2.43092	2.46415	2.44672	2.48647	2.45388	2.47455	2.49209	2.47816	2.49293	2.49127	2.49579	2.49354	2.4907	2.49324	2.49113	2.47653	2.48924
2.50626	2.5186	2.54577	2.52504	2.54421	2.58351	2.47747	2.56531	2.57124	2.52856	2.5416	2.58095	2.48292	2.56451	2.56243	2.5286	2.55507	2.53864	2.56791	2.50751	2.54123	2.52308	2.56022	2.57309	2.56948	2.55366	2.557	2.58035	2.57037	2.57758	2.57527	2.51456	2.51825	2.4392	2.47868	2.46203	2.53033	2.47809	2.51683	2.53799	2.50688	2.54458	2.54317	2.56103	2.54565	2.55751	2.54951	2.54078	2.50533	2.53453
2.4955	2.50286	2.5279	2.506	2.52852	2.55094	2.47096	2.54891	2.54278	2.51617	2.52062	2.55014	2.46849	2.55759	2.54783	2.51409	2.53752	2.53003	2.54784	2.48927	2.52472	2.50199	2.54047	2.55439	2.55513	2.52769	2.53977	2.55617	2.54945	2.54259	2.55342	2.50364	2.50791	2.42842	2.46169	2.45659	2.52425	2.47439	2.50551	2.51804	2.49153	2.53203	2.52313	2.54239	2.52683	2.52474	2.53327	2.52504	2.49739	2.53259
2.43804	2.44315	2.46012	2.45024	2.46409	2.47245	2.42087	2.46948	2.472	2.447	2.45219	2.47235	2.43278	2.46289	2.4676	2.45342	2.46427	2.46074	2.46521	2.43678	2.45601	2.4534	2.46854	2.46677	2.46756	2.45898	2.47259	2.47604	2.47269	2.47331	2.47381	2.45222	2.44605	2.40973	2.43361	2.43438	2.4586	2.43223	2.45294	2.46747	2.44382	2.46242	2.46397	2.46783	2.46482	2.46109	2.464	2.46644	2.44226	2.46505
2.42337	2.42913	2.45068	2.44334	2.44975	2.46424	2.41624	2.4547	2.45777	2.44728	2.44464	2.45525	2.42482	2.45516	2.45709	2.44028	2.45734	2.45098	2.4515	2.42732	2.44391	2.44159	2.4566	2.46174	2.45435	2.44704	2.45748	2.45566	2.45713	2.45847	2.45644	2.43703	2.43712	2.39901	2.42082	2.41585	2.44515	2.41786	2.44121	2.45527	2.43043	2.45223	2.45002	2.45297	2.45266	2.44864	2.45042	2.45317	2.43752	2.45278
2.44971	2.45445	2.4642	2.45198	2.4681	2.47452	2.4321	2.4678	2.47549	2.46201	2.4635	2.47082	2.44323	2.46544	2.47317	2.46718	2.46741	2.48447	2.47058	2.4457	2.47226	2.46162	2.47608	2.47285	2.47753	2.46496	2.47033	2.47867	2.48025	2.48133	2.47162	2.45764	2.46329	2.41825	2.43536	2.42881	2.46192	2.4442	2.45933	2.46725	2.45051	2.47049	2.46264	2.46962	2.46225	2.45929	2.4666	2.46916	2.44753	2.46525
2.42366	2.43904	2.43737	2.43845	2.43994	2.44791	2.41927	2.44584	2.45225	2.4378	2.4395	2.45372	2.42832	2.44354	2.4506	2.44126	2.44466	2.45056	2.44571	2.43372	2.44963	2.43573	2.45127	2.4464	2.44705	2.43973	2.44673	2.45136	2.44998	2.45252	2.44957	2.43219	2.43011	2.39987	2.41757	2.40752	2.43661	2.41565	2.42986	2.43648	2.42728	2.43679	2.43657	2.44213	2.4372	2.43834	2.43843	2.43906	2.42388	2.44103
2.43896	2.44217	2.45922	2.45315	2.45898	2.46605	2.42351	2.46277	2.46384	2.45905	2.46509	2.46638	2.43012	2.45424	2.47027	2.45679	2.45811	2.47476	2.46284	2.4325	2.4711	2.45549	2.46792	2.46683	2.46301	2.46334	2.46273	2.46683	2.46452	2.4684	2.46144	2.44135	2.45248	2.40338	2.42641	2.42145	2.45855	2.42677	2.44458	2.45874	2.4382	2.45921	2.4587	2.46211	2.45714	2.4593	2.46029	2.46254	2.44626	2.46678
2.4189	2.4193	2.43184	2.42153	2.42772	2.44009	2.40066	2.441	2.43651	2.42888	2.42593	2.43234	2.41111	2.42673	2.43223	2.42978	2.43115	2.43014	2.42658	2.41353	2.42818	2.42715	2.43371	2.43601	2.43268	2.43395	2.42791	2.43376	2.43057	2.43377	2.42881	2.41971	2.4242	2.3926	2.40631	2.40106	2.42953	2.40915	2.42141	2.43353	2.42055	2.42641	2.42492	2.43083	2.42178	2.42897	2.42567	2.4215	2.42455	2.43374
2.41325	2.42242	2.41389	2.41717	2.41802	2.42387	2.39735	2.41887	2.42057	2.41985	2.42003	2.42256	2.4081	2.4151	2.4252	2.41986	2.42353	2.42174	2.41217	2.41047	2.42427	2.41594	2.4182	2.42372	2.42676	2.42771	2.42187	2.41833	2.42155	2.42573	2.42093	2.4169	2.41199	2.38668	2.40467	2.3905	2.41836	2.41169	2.41066	2.42554	2.41011	2.42422	2.42146	2.4217	2.41728	2.42177	2.42749	2.4223	2.40819	2.42652
2.4169	2.42358	2.42682	2.41531	2.42759	2.43386	2.4109	2.42664	2.43281	2.41917	2.42478	2.43088	2.40635	2.43098	2.43345	2.4194	2.4303	2.4348	2.42945	2.41451	2.42328	2.41237	2.43136	2.43573	2.43151	2.42359	2.43104	2.43204	2.43437	2.42994	2.432	2.41716	2.41521	2.38124	2.40514	2.38961	2.42417	2.40254	2.41161	2.42607	2.41232	2.4325	2.41955	2.42223	2.4133	2.42644	2.42615	2.41615	2.41164	2.42166
2.41399	2.41615	2.42562	2.42074	2.42646	2.43349	2.40405	2.42637	2.43253	2.41427	2.42308	2.42805	2.41209	2.42943	2.42709	2.41968	2.42697	2.41981	2.43067	2.41475	2.41779	2.41384	2.42993	2.4296	2.42712	2.41696	2.43233	2.42799	2.43092	2.4302	2.43264	2.42241	2.42324	2.3872	2.40905	2.40086	2.41823	2.4054	2.41525	2.42373	2.41434	2.42774	2.42001	2.42733	2.42524	2.42288	2.42608	2.424	2.40646	2.4213
2.44972	2.47215	2.47135	2.45708	2.47408	2.49302	2.43908	2.48056	2.48691	2.45888	2.47823	2.48274	2.43747	2.48367	2.48223	2.46801	2.46674	2.48696	2.48204	2.4611	2.47943	2.46889	2.48591	2.48712	2.47998	2.47016	2.47925	2.48753	2.4858	2.48977	2.48026	2.44746	2.45589	2.41887	2.43389	2.42867	2.46524	2.43645	2.4515	2.46628	2.44708	2.46994	2.4706	2.47367	2.47128	2.4646	2.46934	2.47407	2.45749	2.474
2.43421	2.44142	2.44305	2.44373	2.44643	2.45814	2.42404	2.45673	2.46011	2.44312	2.45422	2.4606	2.43231	2.45381	2.46373	2.44712	2.45427	2.46203	2.45765	2.43624	2.45751	2.44937	2.45998	2.46055	2.46376	2.44877	2.45337	2.46103	2.46382	2.46896	2.45995	2.43985	2.43973	2.4088	2.43005	2.41559	2.44286	2.42438	2.44032	2.45677	2.43695	2.45065	2.4583	2.45769	2.45647	2.45385	2.45251	2.46154	2.43413	2.45069
2.43335	2.43941	2.44148	2.43335	2.44416	2.45645	2.4262	2.44587	2.45856	2.44268	2.4518	2.44826	2.42574	2.44594	2.44583	2.44595	2.44885	2.45445	2.44756	2.43285	2.44604	2.45105	2.45337	2.45584	2.45501	2.44756	2.44791	2.45147	2.45209	2.45406	2.45152	2.43861	2.43607	2.40267	2.42208	2.41065	2.43533	2.41985	2.4305	2.44318	2.43535	2.44822	2.43983	2.44495	2.44256	2.44883	2.44653	2.44589	2.43636	2.44876
2.46034	2.47567	2.48976	2.47497	2.48969	2.50909	2.44605	2.49695	2.50372	2.48221	2.48416	2.49721	2.45355	2.49916	2.4956	2.47974	2.49905	2.487	2.49939	2.46228	2.48037	2.47836	2.49973	2.50001	2.49934	2.48545	2.49923	2.49978	2.50449	2.50808	2.50663	2.48023	2.48124	2.41511	2.45646	2.442	2.4858	2.45566	2.48676	2.50705	2.47218	2.50308	2.49867	2.50236	2.49105	2.49449	2.49339	2.50024	2.4745	2.49961
2.44817	2.4642	2.48182	2.46021	2.47612	2.49339	2.43582	2.48922	2.49235	2.47549	2.47652	2.48671	2.44417	2.48504	2.48561	2.46631	2.48906	2.47743	2.48083	2.45557	2.46372	2.46192	2.48657	2.48731	2.48576	2.47805	2.47864	2.48711	2.49333	2.49436	2.49422	2.46672	2.46456	2.40086	2.45122	2.43046	2.48445	2.44168	2.47407	2.49531	2.46845	2.49048	2.48733	2.48514	2.48555	2.48226	2.49617	2.48676	2.47227	2.49802
2.45225	2.46368	2.47216	2.45793	2.47081	2.4841	2.43307	2.48367	2.48128	2.46777	2.47523	2.47061	2.44012	2.48102	2.47839	2.45969	2.4757	2.47506	2.47199	2.44346	2.46218	2.45643	2.47924	2.48348	2.48447	2.46948	2.47731	2.47664	2.48745	2.48748	2.48446	2.46118	2.46465	2.40387	2.44964	2.43431	2.47925	2.44152	2.47451	2.48199	2.46128	2.48467	2.47928	2.48574	2.47678	2.47746	2.4823	2.47875	2.45648	2.47891
2.4628	2.47043	2.484	2.4689	2.49203	2.49644	2.45001	2.49288	2.49407	2.48468	2.48696	2.49152	2.44952	2.48971	2.48918	2.47335	2.48923	2.48564	2.49	2.45564	2.47481	2.4716	2.49269	2.4971	2.50141	2.49039	2.49122	2.50067	2.49867	2.5004	2.50072	2.47688	2.48452	2.40975	2.45377	2.43944	2.49682	2.45146	2.48759	2.5021	2.47673	2.50012	2.49008	2.49973	2.48676	2.50214	2.49665	2.49781	2.4759	2.50441
2.44964	2.46217	2.464	2.45504	2.46612	2.4745	2.43695	2.47356	2.47045	2.46275	2.45951	2.47339	2.43888	2.46367	2.46658	2.45587	2.46473	2.46421	2.46678	2.4445	2.45894	2.45624	2.4666	2.4644	2.47126	2.46025	2.465	2.47048	2.4684	2.47221	2.47098	2.45407	2.45833	2.40791	2.44336	2.4249	2.46361	2.43186	2.45866	2.47361	2.45352	2.47592	2.46415	2.46997	2.46574	2.46518	2.4647	2.46788	2.46132	2.47033
2.45331	2.45683	2.46943	2.46176	2.47477	2.49266	2.42975	2.4802	2.48496	2.47037	2.46877	2.47597	2.44274	2.47802	2.47264	2.45986	2.47691	2.46556	2.47497	2.44931	2.45839	2.45098	2.47922	2.47938	2.47655	2.46822	2.47734	2.47509	2.47861	2.47778	2.47681	2.46011	2.46302	2.41497	2.43715	2.42762	2.47061	2.44383	2.45099	2.4671	2.45842	2.4756	2.46512	2.47424	2.46722	2.46952	2.47078	2.46849	2.46581	2.48014
2.42468	2.44249	2.44854	2.43762	2.44911	2.4637	2.42351	2.46395	2.46019	2.44573	2.45479	2.46105	2.42256	2.45752	2.45712	2.44399	2.4548	2.45447	2.4542	2.4373	2.4456	2.43743	2.45533	2.45616	2.45963	2.45273	2.45647	2.46338	2.4579	2.46436	2.46329	2.43521	2.43816	2.39566	2.41643	2.40935	2.44726	2.41949	2.43614	2.44709	2.4407	2.45227	2.44651	2.45013	2.44817	2.45183	2.44808	2.44502	2.43698	2.45597
2.4075	2.41908	2.41158	2.41709	2.41624	2.43114	2.40361	2.42415	2.42773	2.41413	2.42299	2.42568	2.40404	2.42175	2.42342	2.41501	2.41883	2.41941	2.41752	2.41276	2.41722	2.41551	2.42705	2.4202	2.42295	2.41893	2.42051	2.4242	2.41828	2.42485	2.42378	2.41206	2.41051	2.37998	2.40563	2.3923	2.41144	2.39293	2.41485	2.42514	2.41482	2.4215	2.42061	2.42528	2.42614	2.41444	2.42334	2.42425	2.41215	2.42005
2.4175	2.43404	2.43322	2.427	2.44459	2.44015	2.4133	2.44157	2.44351	2.43726	2.4413	2.43994	2.41768	2.43539	2.43493	2.43244	2.4413	2.43433	2.43975	2.42531	2.43552	2.43344	2.44366	2.44211	2.44182	2.43224	2.44182	2.44308	2.44395	2.44322	2.43504	2.4217	2.42724	2.39025	2.41429	2.40655	2.4329	2.40839	2.43051	2.44138	2.42245	2.44037	2.44043	2.44425	2.43791	2.43781	2.43783	2.43862	2.42629	2.43547
2.44811	2.46348	2.46986	2.46474	2.48002	2.4872	2.4398	2.48158	2.49058	2.4902	2.4787	2.48207	2.45028	2.47549	2.48385	2.47936	2.48362	2.48807	2.47595	2.45282	2.48821	2.48077	2.48094	2.49234	2.49641	2.48547	2.48325	2.49153	2.49487	2.49781	2.48249	2.45859	2.45885	2.41708	2.4314	2.43681	2.46732	2.43696	2.46134	2.47684	2.45702	2.48436	2.46487	2.47908	2.47108	2.47292	2.47402	2.47967	2.46126	2.48306
2.41961	2.42976	2.42293	2.42428	2.42862	2.43104	2.40832	2.43169	2.43608	2.41591	2.42621	2.43523	2.40594	2.429	2.42965	2.41707	2.43437	2.43378	2.43199	2.42043	2.42047	2.41672	2.42926	2.43116	2.42874	2.42302	2.42806	2.42823	2.42989	2.43107	2.43319	2.42829	2.41917	2.38245	2.41374	2.39914	2.42752	2.39994	2.42122	2.42912	2.4095	2.43154	2.4237	2.42682	2.42531	2.4318	2.43043	2.43033	2.4141	2.42867
2.43244	2.45169	2.44783	2.43958	2.44827	2.46006	2.42313	2.45869	2.46433	2.44702	2.45351	2.4667	2.42772	2.46086	2.45888	2.44298	2.4585	2.45333	2.45552	2.43586	2.4475	2.43846	2.45703	2.46607	2.46169	2.44542	2.45689	2.4627	2.46379	2.45988	2.46745	2.44619	2.44222	2.40313	2.43059	2.41668	2.44553	2.43062	2.43941	2.45661	2.43497	2.45603	2.44851	2.45262	2.45513	2.45497	2.45122	2.45721	2.44373	2.45808
2.4281	2.44169	2.44548	2.43549	2.44972	2.45082	2.41852	2.45228	2.45526	2.44327	2.44406	2.44469	2.42095	2.44468	2.45126	2.43587	2.45177	2.439	2.44729	2.42965	2.44056	2.43192	2.45815	2.45112	2.44747	2.44222	2.45173	2.45449	2.45336	2.45191	2.45068	2.43748	2.44347	2.40058	2.42899	2.41385	2.4492	2.41696	2.44211	2.45073	2.43478	2.45268	2.44189	2.45259	2.44405	2.44133	2.44144	2.44467	2.43522	2.45282
2.41925	2.42978	2.43541	2.42972	2.43431	2.44614	2.41572	2.4454	2.44785	2.433	2.43826	2.44681	2.41999	2.44036	2.44431	2.43179	2.43982	2.43735	2.44264	2.42657	2.4326	2.43103	2.44081	2.44308	2.44674	2.43582	2.43959	2.44134	2.44787	2.45127	2.44283	2.4318	2.43033	2.38758	2.42121	2.40199	2.43207	2.41516	2.43771	2.4412	2.43184	2.44289	2.44012	2.4431	2.44273	2.43688	2.44273	2.44062	2.42468	2.44319
2.41728	2.42676	2.42734	2.41602	2.43316	2.43052	2.41174	2.42797	2.43635	2.41695	2.43129	2.43143	2.4132	2.42802	2.42964	2.42388	2.42294	2.43135	2.43191	2.42314	2.42881	2.4188	2.42708	2.43259	2.43397	2.43046	2.43087	2.43517	2.43173	2.43333	2.43059	2.4155	2.41486	2.38842	2.41117	2.40334	2.42213	2.40276	2.42736	2.42792	2.41415	2.42939	2.42166	2.43014	2.42577	2.42382	2.43005	2.42781	2.41639	2.42625
2.43759	2.447	2.45726	2.44499	2.45302	2.465	2.41788	2.46126	2.46209	2.44764	2.44377	2.46918	2.4283	2.45425	2.46197	2.44642	2.45768	2.45351	2.45985	2.43293	2.45178	2.4429	2.45708	2.45796	2.45996	2.45731	2.45738	2.46053	2.46132	2.46283	2.45492	2.44238	2.43999	2.40967	2.43203	2.41584	2.44997	2.43592	2.44096	2.45046	2.43773	2.46419	2.45309	2.45696	2.45377	2.45724	2.45362	2.4546	2.43455	2.45883
2.44271	2.45256	2.46796	2.45568	2.46406	2.47589	2.42894	2.47995	2.47515	2.4671	2.45912	2.47276	2.43355	2.47142	2.47263	2.45963	2.47183	2.4618	2.46811	2.44259	2.46347	2.45995	2.47095	2.47501	2.47835	2.4677	2.47262	2.478	2.48016	2.4805	2.47855	2.45487	2.4554	2.40901	2.43247	2.42335	2.46111	2.43911	2.45731	2.47123	2.44939	2.47846	2.47327	2.47865	2.47212	2.47203	2.46837	2.46749	2.46465	2.47721
2.43077	2.43911	2.45305	2.44637	2.45725	2.45642	2.42725	2.45108	2.46423	2.45442	2.45668	2.45686	2.43715	2.45313	2.46179	2.46371	2.45459	2.4622	2.45743	2.43747	2.46048	2.46081	2.46327	2.45676	2.45924	2.46195	2.46046	2.46074	2.46199	2.46769	2.46197	2.44996	2.44937	2.40754	2.43083	2.43677	2.44875	2.43307	2.43949	2.45708	2.44051	2.44901	2.45215	2.45515	2.45385	2.45789	2.45789	2.46235	2.44087	2.46143
2.4328	2.4527	2.44594	2.44329	2.4536	2.46836	2.43057	2.46831	2.47472	2.45071	2.4592	2.47375	2.43068	2.46269	2.47005	2.45732	2.45712	2.45694	2.47134	2.44359	2.45676	2.45022	2.45794	2.46874	2.46389	2.45104	2.45898	2.47073	2.47181	2.46617	2.46025	2.4477	2.44271	2.4113	2.42828	2.42104	2.44714	2.42968	2.45113	2.46298	2.43449	2.45782	2.46114	2.46295	2.46507	2.45388	2.46065	2.46369	2.44141	2.45936
2.4245	2.43351	2.45345	2.44817	2.45636	2.45728	2.41805	2.45902	2.45457	2.44811	2.44436	2.44968	2.43132	2.44616	2.45259	2.45107	2.46036	2.46058	2.44968	2.42788	2.46555	2.46133	2.46212	2.45368	2.46407	2.46155	2.45797	2.46126	2.4577	2.47293	2.45689	2.43603	2.44138	2.40285	2.4249	2.42754	2.44889	2.42487	2.44846	2.45623	2.43797	2.45453	2.4438	2.45536	2.4507	2.44479	2.45768	2.45402	2.43854	2.45554
2.42815	2.4296	2.44967	2.43537	2.44484	2.45203	2.41819	2.4536	2.44774	2.44391	2.44912	2.45277	2.41982	2.44757	2.45426	2.43336	2.44825	2.44722	2.44885	2.425	2.44239	2.43693	2.44371	2.45043	2.44807	2.44584	2.44774	2.4501	2.44795	2.45411	2.44985	2.43401	2.43369	2.39692	2.41966	2.41337	2.43647	2.41892	2.4377	2.44264	2.42933	2.44714	2.43893	2.44836	2.44244	2.44411	2.44684	2.43569	2.43658	2.45022
2.39878	2.39942	2.39514	2.39277	2.39864	2.40522	2.38267	2.4035	2.40041	2.39515	2.39439	2.40163	2.38325	2.39463	2.40015	2.40148	2.40315	2.40264	2.39846	2.38471	2.4024	2.39959	2.40126	2.39921	2.39873	2.40188	2.39796	2.40154	2.3954	2.39875	2.40095	2.39087	2.3926	2.37345	2.38722	2.38094	2.39724	2.38384	2.39124	2.40248	2.39262	2.40605	2.40045	2.40244	2.39619	2.4032	2.40283	2.39447	2.39206	2.40235
2.42556	2.44084	2.43548	2.43007	2.43841	2.44373	2.41703	2.44098	2.44316	2.43718	2.44052	2.44291	2.41776	2.4337	2.434	2.43609	2.4442	2.43957	2.43137	2.42629	2.43838	2.43657	2.44205	2.44188	2.44496	2.43927	2.4388	2.4434	2.44445	2.45064	2.44682	2.42598	2.42796	2.39537	2.41732	2.40548	2.42718	2.41361	2.422	2.43627	2.42601	2.43554	2.44088	2.43369	2.43755	2.44053	2.44098	2.43704	2.42464	2.43796
2.41917	2.41979	2.42566	2.42768	2.43496	2.4336	2.40775	2.43027	2.4384	2.42359	2.42825	2.43675	2.40789	2.42157	2.42809	2.4275	2.43186	2.42888	2.42687	2.42276	2.43017	2.42297	2.43135	2.43347	2.4401	2.43534	2.43262	2.43513	2.4393	2.44124	2.44096	2.42108	2.41887	2.38457	2.41006	2.39661	2.42404	2.40503	2.41797	2.4288	2.40971	2.42165	2.43149	2.43024	2.42955	2.4235	2.43418	2.42831	2.41201	2.42906
2.4378	2.46643	2.46367	2.45077	2.46757	2.48329	2.43764	2.48214	2.48923	2.46243	2.47288	2.48693	2.43792	2.48054	2.49223	2.46618	2.47304	2.49305	2.48328	2.45285	2.47931	2.46368	2.47816	2.48673	2.48738	2.46183	2.475	2.48257	2.48661	2.48606	2.47924	2.45546	2.45672	2.40988	2.43339	2.4246	2.46126	2.42979	2.45749	2.47285	2.44555	2.47174	2.46874	2.48065	2.47892	2.46821	2.47008	2.4785	2.45072	2.47284
2.44073	2.45627	2.4598	2.45209	2.46459	2.4894	2.43098	2.47731	2.48444	2.4603	2.47329	2.4923	2.43207	2.47238	2.48477	2.46498	2.47292	2.48076	2.47831	2.45206	2.46886	2.46263	2.47539	2.48395	2.48054	2.46928	2.47562	2.4784	2.48651	2.48698	2.47979	2.44628	2.44609	2.41176	2.43192	2.42906	2.4471	2.42381	2.45087	2.47204	2.44355	2.46693	2.47206	2.47457	2.47403	2.46718	2.47553	2.47749	2.44849	2.47367
2.43649	2.45147	2.44902	2.44909	2.45521	2.45981	2.42741	2.45606	2.45912	2.44833	2.45162	2.4607	2.43094	2.45622	2.46042	2.45388	2.45573	2.46614	2.46199	2.44245	2.4601	2.45001	2.45748	2.45936	2.46171	2.46009	2.46239	2.46019	2.46133	2.46271	2.46046	2.44472	2.45008	2.40752	2.43177	2.42065	2.44485	2.42836	2.44097	2.45581	2.43454	2.44952	2.45515	2.45255	2.45172	2.45099	2.45347	2.45515	2.4473	2.45603
2.45991	2.47498	2.47673	2.47369	2.48049	2.4851	2.44558	2.49212	2.49094	2.47721	2.48412	2.48751	2.44557	2.49063	2.48594	2.47239	2.48621	2.48654	2.48067	2.45986	2.47347	2.46741	2.48781	2.49072	2.49423	2.47905	2.48741	2.48933	2.4919	2.4909	2.49267	2.45457	2.45539	2.41007	2.44262	2.42601	2.46544	2.43593	2.46258	2.47821	2.45595	2.47621	2.47579	2.4777	2.47133	2.47383	2.47885	2.47921	2.46328	2.48193
2.44727	2.4628	2.47146	2.46055	2.47647	2.48541	2.44117	2.48243	2.47891	2.47355	2.47843	2.48092	2.4433	2.47399	2.47521	2.46453	2.47592	2.47494	2.4724	2.45294	2.47323	2.4621	2.47634	2.48409	2.48808	2.47065	2.47876	2.48041	2.4893	2.49045	2.48335	2.46825	2.46723	2.41063	2.45454	2.43747	2.47129	2.44273	2.46974	2.4913	2.46052	2.48656	2.48362	2.48034	2.48027	2.4883	2.48655	2.48323	2.4565	2.49073
2.44244	2.447	2.45696	2.43874	2.45271	2.48023	2.43364	2.46405	2.46757	2.46178	2.46247	2.46381	2.42805	2.47088	2.46712	2.44885	2.46865	2.47141	2.46689	2.43859	2.45656	2.44628	2.47227	2.47677	2.47764	2.45571	2.46484	2.46503	2.47534	2.46925	2.47118	2.44475	2.45265	2.39531	2.42076	2.42434	2.46715	2.43247	2.44854	2.47153	2.44674	2.45986	2.46679	2.4607	2.46084	2.45781	2.46631	2.4673	2.44182	2.4762
2.43714	2.45321	2.46041	2.45179	2.46284	2.4763	2.42704	2.47252	2.47333	2.46276	2.46226	2.46939	2.43357	2.46442	2.46444	2.45277	2.47344	2.46477	2.46052	2.4468	2.45729	2.44586	2.47222	2.47154	2.47733	2.45583	2.46427	2.4773	2.47419	2.47614	2.48086	2.46299	2.45961	2.40265	2.43732	2.42105	2.4738	2.42901	2.46204	2.47627	2.45486	2.46899	2.47085	2.46651	2.46736	2.46715	2.4655	2.4697	2.44614	2.48013
2.45342	2.48043	2.47592	2.47129	2.47707	2.49243	2.44371	2.49013	2.49714	2.46759	2.48111	2.48675	2.45288	2.48709	2.48286	2.46656	2.48345	2.48244	2.48977	2.46129	2.47781	2.46698	2.48843	2.48302	2.49018	2.47468	2.47924	2.48897	2.48659	2.49363	2.49593	2.47106	2.47054	2.41431	2.45723	2.43604	2.48173	2.4476	2.47431	2.48818	2.46388	2.48882	2.47939	2.48163	2.48127	2.48408	2.4835	2.48621	2.46857	2.49274
2.45673	2.47928	2.48563	2.47141	2.49078	2.50352	2.44515	2.49596	2.4996	2.47402	2.48807	2.49413	2.44597	2.49406	2.49029	2.47352	2.49152	2.48758	2.50099	2.45696	2.47446	2.46618	2.50104	2.50111	2.49437	2.47819	2.49498	2.4985	2.49676	2.49521	2.49425	2.47039	2.47272	2.41266	2.45748	2.43428	2.48058	2.44242	2.47112	2.48865	2.46694	2.49478	2.49088	2.49062	2.49196	2.48851	2.48984	2.48854	2.47284	2.49238
2.43692	2.45161	2.4613	2.4546	2.46558	2.48227	2.43363	2.47555	2.47692	2.45817	2.46628	2.47357	2.43598	2.47412	2.47271	2.45952	2.46833	2.46259	2.47345	2.45192	2.46091	2.46006	2.47524	2.47173	2.47209	2.46029	2.46802	2.47393	2.47436	2.47771	2.47998	2.45747	2.46284	2.41346	2.44919	2.43657	2.46303	2.43444	2.46204	2.47274	2.45317	2.46643	2.46728	2.47454	2.47209	2.46687	2.46978	2.47877	2.45484	2.47888
2.43373	2.44588	2.44976	2.44481	2.45439	2.45938	2.42624	2.46014	2.46331	2.45081	2.45251	2.46331	2.43324	2.45816	2.45486	2.45189	2.45212	2.45051	2.4574	2.44027	2.45713	2.44707	2.4613	2.45605	2.46257	2.45285	2.45506	2.46262	2.45919	2.46533	2.46413	2.44583	2.44111	2.39866	2.42287	2.41745	2.44996	2.42343	2.44028	2.46157	2.44344	2.45821	2.4559	2.45274	2.45355	2.45097	2.45541	2.45897	2.44177	2.45959
2.41608	2.42452	2.42589	2.42577	2.43085	2.43617	2.40699	2.4297	2.43222	2.43002	2.4273	2.43706	2.41529	2.4301	2.43379	2.43536	2.43452	2.43322	2.43381	2.42211	2.43534	2.42944	2.44006	2.4368	2.43882	2.42947	2.43684	2.43667	2.43755	2.44179	2.43461	2.43049	2.42076	2.39203	2.41791	2.40498	2.4296	2.40956	2.42147	2.43041	2.41763	2.43729	2.42596	2.43474	2.42977	2.43249	2.42862	2.42926	2.41797	2.4337
2.45574	2.46895	2.47583	2.47512	2.48042	2.49106	2.44092	2.4879	2.48503	2.48648	2.47846	2.47848	2.44319	2.4756	2.48235	2.48174	2.48831	2.48279	2.47762	2.45767	2.48455	2.47869	2.48767	2.49206	2.49426	2.48287	2.48462	2.49457	2.49469	2.49539	2.49141	2.46933	2.47228	2.41658	2.44066	2.42871	2.48147	2.45047	2.46875	2.48045	2.46536	2.48868	2.48024	2.48048	2.47718	2.48364	2.48108	2.48344	2.46787	2.48762
2.41589	2.4247	2.42691	2.41896	2.43414	2.42982	2.40385	2.42881	2.43338	2.42706	2.42591	2.43008	2.40041	2.42666	2.42888	2.42222	2.43017	2.43575	2.4302	2.41049	2.42762	2.42557	2.43004	2.43618	2.43917	2.43428	2.43331	2.43332	2.43199	2.4351	2.43516	2.42149	2.42084	2.38429	2.40237	2.40064	2.42477	2.41039	2.42015	2.42937	2.41653	2.43115	2.42276	2.427	2.42097	2.42622	2.429	2.42156	2.4168	2.42649
2.42533	2.43515	2.44439	2.43389	2.4417	2.45331	2.41885	2.44986	2.45778	2.44194	2.44439	2.45667	2.41964	2.45223	2.45273	2.44017	2.44752	2.44364	2.45409	2.42943	2.43786	2.43506	2.44908	2.44863	2.44997	2.44235	2.44773	2.45333	2.45134	2.45668	2.45244	2.43267	2.43189	2.39296	2.41641	2.40659	2.44217	2.41347	2.43606	2.44119	2.42692	2.43786	2.44535	2.45099	2.44706	2.44216	2.44963	2.44231	2.42897	2.44473
2.4367	2.45846	2.46042	2.4507	2.45822	2.47362	2.437	2.47091	2.47091	2.45781	2.45749	2.47195	2.43498	2.4654	2.46589	2.45211	2.46747	2.45882	2.47179	2.44967	2.45637	2.44835	2.46822	2.46864	2.46892	2.45578	2.4664	2.47039	2.4729	2.47136	2.4686	2.4554	2.45281	2.40687	2.4404	2.4303	2.46353	2.42726	2.4527	2.46708	2.44643	2.4719	2.45848	2.47325	2.46617	2.46764	2.46532	2.46842	2.44827	2.46432
2.41856	2.42716	2.42944	2.42802	2.43432	2.44132	2.4076	2.44237	2.44835	2.42357	2.43144	2.44859	2.41376	2.44114	2.44352	2.42369	2.43602	2.43079	2.4421	2.42143	2.42073	2.42116	2.4392	2.44219	2.43753	2.42729	2.43884	2.44434	2.44447	2.43865	2.4423	2.41949	2.4174	2.37783	2.4061	2.39704	2.42347	2.39974	2.41711	2.43929	2.41224	2.43453	2.43487	2.43646	2.43523	2.4349	2.44055	2.43399	2.41575	2.42943
2.42076	2.42507	2.43085	2.42921	2.43372	2.43595	2.41174	2.4378	2.43104	2.43269	2.42902	2.43762	2.40911	2.4299	2.43431	2.42808	2.4361	2.42859	2.42868	2.41994	2.42533	2.42315	2.43453	2.43812	2.43944	2.43029	2.43513	2.44129	2.44124	2.44228	2.43691	2.42359	2.4212	2.38945	2.41456	2.40337	2.4271	2.41074	2.43564	2.43688	2.42334	2.43723	2.43576	2.43573	2.44005	2.43842	2.43136	2.43555	2.41819	2.43453
[truncated: 404 more columns]

## Sheet: Redundancy_HCP_S454
0.00433428	0.219648	0.299449	0.235811	0.212614	0.0833294	0.0854842	0.217424	0.0936316	0.10917	0.0869691	0.0286939	0.0803016	0.0995715	0.0355773	0.10144	0.136328	0.0583151	0.0517018	0.0798589	0.0668244	0.0990696	0.190729	0.0665331	0.0819966	0.125904	0.145406	0.175404	0.0868552	0.0952725	0.123482	0.0755221	0.0967935	0.0418462	0.0512774	0.064993	0.0829029	0.0778811	0.0652318	0.0547001	0.075775	0.0675006	0.0552704	0.0631034	0.0473902	0.0970433	0.0636373	0.0646235	0.0739523	0.0727492
0.219648	0.00433428	0.0767171	0.142844	0.083099	0.0227034	0.15847	0.0637049	0.0396423	0.0576367	0.0421014	0.0169675	0.0743885	0.0235915	0.0200391	0.078421	0.0499985	0.034254	0.0160322	0.119193	0.0383867	0.0847714	0.089216	0.0278403	0.0379943	0.101075	0.0552947	0.145393	0.0351718	0.0505922	0.0624415	0.0524947	0.0609298	0.0334007	0.0425978	0.0493518	0.052596	0.051911	0.0365059	0.0294623	0.0492779	0.0382601	0.0353308	0.042593	0.0322964	0.0511615	0.0349394	0.0385516	0.0462451	0.0381698
0.299449	0.0767171	0.00433428	0.312996	0.526406	0.335785	0.0478528	0.48481	0.288117	0.206328	0.203985	0.0770885	0.0936111	0.306669	0.104393	0.165117	0.328101	0.152406	0.172347	0.0862927	0.126615	0.144103	0.371633	0.207289	0.213977	0.195939	0.393606	0.235653	0.260267	0.222931	0.227638	0.0871014	0.119276	0.0486713	0.0568217	0.0731513	0.103657	0.0942535	0.0706875	0.0697389	0.0875944	0.0770583	0.0619241	0.0702706	0.054846	0.0971597	0.0779746	0.0861569	0.0844141	0.117362
0.235811	0.142844	0.312996	0.00433428	0.53518	0.070771	0.121779	0.18702	0.15395	0.423535	0.24181	0.0367	0.208583	0.0958144	0.0449917	0.29542	0.214093	0.148771	0.05903	0.135386	0.21492	0.295309	0.315939	0.150631	0.264771	0.375041	0.338619	0.249017	0.258188	0.315018	0.225037	0.097118	0.126081	0.0601979	0.0668161	0.0953941	0.117055	0.115534	0.0866263	0.0751707	0.105787	0.0862597	0.0725956	0.0774418	0.062099	0.100858	0.0882341	0.0938442	0.0990378	0.124762
0.212614	0.083099	0.526406	0.53518	0.00433428	0.193872	0.0571133	0.304396	0.375115	0.455588	0.559807	0.0568314	0.128404	0.218074	0.116733	0.28372	0.362819	0.312188	0.169499	0.10766	0.278791	0.270035	0.416597	0.350784	0.395832	0.345263	0.618573	0.262678	0.467149	0.411397	0.289945	0.104235	0.145486	0.0583425	0.0647802	0.0982487	0.123614	0.115877	0.0968854	0.0864936	0.108687	0.0920602	0.0739461	0.0879632	0.0689163	0.110861	0.091373	0.10757	0.110304	0.162565
0.0833294	0.0227034	0.335785	0.070771	0.193872	0.00433428	0.0186643	0.363455	0.440172	0.0753842	0.121451	0.323368	0.0322154	0.46547	0.230226	0.0625031	0.189627	0.10074	0.261427	0.0384476	0.0589728	0.0584908	0.221221	0.164362	0.114135	0.0648924	0.223978	0.106469	0.174459	0.0998555	0.11639	0.0353405	0.0447729	0.0243575	0.0235161	0.0328192	0.0404947	0.0346364	0.0286084	0.0320263	0.0329037	0.033096	0.025135	0.0287347	0.0217031	0.0333474	0.0308068	0.0354152	0.0347995	0.0442232
0.0854842	0.15847	0.0478528	0.121779	0.0571133	0.0186643	0.00433428	0.0268804	0.0279254	0.0590156	0.0393787	0.0113221	0.10971	0.0201151	0.0178819	0.0798788	0.0318367	0.0317429	0.0127987	0.110267	0.05138	0.0980236	0.0511027	0.0218815	0.0403929	0.0966452	0.0402787	0.0747691	0.0354621	0.0540954	0.0398744	0.0393434	0.0494037	0.0337969	0.0311049	0.0409098	0.0413857	0.0419514	0.035844	0.025623	0.0350351	0.0269835	0.0232772	0.0238827	0.0222215	0.026391	0.0275109	0.0280188	0.0315597	0.0331687
0.217424	0.0637049	0.48481	0.18702	0.304396	0.363455	0.0268804	0.00433428	0.201394	0.134539	0.127434	0.0743387	0.0579463	0.442496	0.0672884	0.0957515	0.467208	0.0949845	0.183288	0.0501855	0.0762228	0.0881637	0.443978	0.168953	0.151404	0.119977	0.402436	0.266896	0.244412	0.165665	0.316936	0.0659348	0.0867937	0.0335524	0.0420085	0.0538635	0.0826335	0.0698357	0.0489673	0.0517036	0.064123	0.0669403	0.0473107	0.0608097	0.0447805	0.108319	0.0748859	0.0662721	0.0671695	0.0986366
0.0936316	0.0396423	0.288117	0.15395	0.375115	0.440172	0.0279254	0.201394	0.00433428	0.153141	0.269388	0.274857	0.0574998	0.257987	0.44363	0.130672	0.186476	0.271243	0.260659	0.065777	0.136709	0.113357	0.23123	0.278211	0.193965	0.141151	0.307906	0.139044	0.230273	0.152852	0.152519	0.0535305	0.0741477	0.0377031	0.0365481	0.0486261	0.0641386	0.056997	0.0499912	0.0464713	0.0509514	0.0521591	0.0425843	0.045779	0.038004	0.0577653	0.0488677	0.0601689	0.0492631	0.0688384
0.10917	0.0576367	0.206328	0.423535	0.455588	0.0753842	0.0590156	0.134539	0.153141	0.00433428	0.447436	0.0481178	0.210131	0.0920509	0.0578824	0.52592	0.218263	0.2202	0.0702529	0.163207	0.401628	0.394436	0.211024	0.212607	0.442872	0.515622	0.296127	0.13762	0.353145	0.467112	0.187023	0.0849029	0.127378	0.0571681	0.0669167	0.0976803	0.10949	0.0999111	0.094268	0.0877799	0.108425	0.0926886	0.0755912	0.0849562	0.0707278	0.103337	0.083765	0.106155	0.101564	0.160786
0.0869691	0.0421014	0.203985	0.24181	0.559807	0.121451	0.0393787	0.127434	0.269388	0.447436	0.00433428	0.0402064	0.119211	0.110079	0.136929	0.325849	0.195307	0.497943	0.112395	0.0966214	0.42904	0.296001	0.212763	0.389932	0.47125	0.312363	0.367534	0.137236	0.419473	0.367834	0.171524	0.0601723	0.0837184	0.0379457	0.041773	0.0635497	0.0655116	0.0605349	0.0620595	0.054476	0.0611371	0.0540562	0.0460435	0.0517569	0.0448573	0.0646272	0.0548096	0.0685202	0.0662767	0.100502
0.0286939	0.0169675	0.0770885	0.0367	0.0568314	0.323368	0.0113221	0.0743387	0.274857	0.0481178	0.0402064	0.00433428	0.0189363	0.298203	0.3725	0.0296741	0.0396492	0.0669225	0.450986	0.0172631	0.0315033	0.0298104	0.0633502	0.0630827	0.0435771	0.037635	0.0544742	0.0328127	0.0517912	0.0413525	0.0306453	0.0299062	0.0317065	0.0140499	0.0254232	0.0186029	0.0293997	0.0272709	0.0257334	0.0247582	0.028863	0.0226349	0.0302271	0.0313034	0.0252621	0.0348655	0.0300094	0.0290714	0.0259484	0.0345283
0.0803016	0.0743885	0.0936111	0.208583	0.128404	0.0322154	0.10971	0.0579463	0.0574998	0.210131	0.119211	0.0189363	0.00433428	0.0357518	0.027645	0.282442	0.06739	0.0980874	0.0252344	0.159764	0.177919	0.246382	0.0883238	0.0729305	0.158954	0.241985	0.0978406	0.0800875	0.124188	0.197083	0.0905812	0.0637102	0.0796392	0.0586797	0.0463435	0.0720631	0.0669488	0.0727293	0.0560184	0.0394719	0.0614158	0.0451145	0.0323185	0.0352837	0.0296762	0.0474676	0.0374349	0.0468872	0.0568954	0.0593596
0.0995715	0.0235915	0.306669	0.0958144	0.218074	0.46547	0.0201151	0.442496	0.257987	0.0920509	0.110079	0.298203	0.0357518	0.00433428	0.121824	0.0680602	0.359863	0.0970721	0.51458	0.0395682	0.0613963	0.0625032	0.419652	0.233994	0.140947	0.0832381	0.326536	0.13984	0.267334	0.144614	0.171347	0.044183	0.0530042	0.0260946	0.0245361	0.0311089	0.0479446	0.0460522	0.0363557	0.0371168	0.0393424	0.0370868	0.0301624	0.0389609	0.0285284	0.0473611	0.0446781	0.0483219	0.0429198	0.0707791
0.0355773	0.0200391	0.104393	0.0449917	0.116733	0.230226	0.0178819	0.0672884	0.44363	0.0578824	0.136929	0.3725	0.027645	0.121824	0.00433428	0.0748952	0.0543318	0.359845	0.290291	0.0429792	0.120352	0.0586109	0.0755212	0.242999	0.115291	0.0528421	0.102069	0.057452	0.11238	0.0648968	0.063188	0.0322405	0.0367951	0.0179648	0.0267034	0.0220652	0.0337828	0.0299019	0.033581	0.026385	0.0320262	0.0303525	0.0272628	0.0254606	0.0232642	0.0397946	0.0290965	0.0296389	0.0301548	0.0339165
0.10144	0.078421	0.165117	0.29542	0.28372	0.0625031	0.0798788	0.0957515	0.130672	0.52592	0.325849	0.0296741	0.282442	0.0680602	0.0748952	0.00433428	0.126092	0.305547	0.0521197	0.326429	0.566571	0.678355	0.1557	0.170378	0.395605	0.505022	0.198108	0.126304	0.252849	0.367097	0.146212	0.0741637	0.117431	0.0742086	0.0572538	0.101295	0.0873607	0.0999051	0.0874728	0.0636494	0.0931119	0.0736475	0.0559781	0.0601834	0.0603852	0.0722324	0.0651733	0.0975876	0.0854233	0.116121
0.136328	0.0499985	0.328101	0.214093	0.362819	0.189627	0.0318367	0.467208	0.186476	0.218263	0.195307	0.0396492	0.06739	0.359863	0.0543318	0.126092	0.00433428	0.106698	0.14444	0.0632493	0.103784	0.137135	0.460802	0.238592	0.245052	0.213609	0.415253	0.189489	0.360635	0.284081	0.279066	0.108702	0.15081	0.0559822	0.0671864	0.0880301	0.15558	0.111799	0.091724	0.0879791	0.122745	0.108312	0.0841816	0.109201	0.0730229	0.161233	0.112298	0.115453	0.109938	0.166471
0.0583151	0.034254	0.152406	0.148771	0.312188	0.10074	0.0317429	0.0949845	0.271243	0.2202	0.497943	0.0669225	0.0980874	0.0970721	0.359845	0.305547	0.106698	0.00433428	0.14999	0.104545	0.637671	0.290947	0.159675	0.450145	0.438161	0.194617	0.248304	0.117424	0.299629	0.221775	0.125352	0.0494085	0.066051	0.0408103	0.0311898	0.0515544	0.0487505	0.0544393	0.0490437	0.0363937	0.043912	0.0453559	0.0314775	0.0294693	0.0335756	0.0457559	0.0468904	0.055495	0.0405301	0.0606622
0.0517018	0.0160322	0.172347	0.05903	0.169499	0.261427	0.0127987	0.183288	0.260659	0.0702529	0.112395	0.450986	0.0252344	0.51458	0.290291	0.0521197	0.14444	0.14999	0.00433428	0.0221018	0.0651254	0.0484214	0.208181	0.353044	0.134467	0.0620964	0.227931	0.0801191	0.233168	0.107711	0.110284	0.0391239	0.0453974	0.0235336	0.0243926	0.0254012	0.0364204	0.0329561	0.0277575	0.032396	0.0292151	0.0314463	0.0273396	0.0280195	0.0211501	0.0333928	0.0341683	0.0358646	0.0348954	0.0556311
0.0798589	0.119193	0.0862927	0.135386	0.10766	0.0384476	0.110267	0.0501855	0.065777	0.163207	0.0966214	0.0172631	0.159764	0.0395682	0.0429792	0.326429	0.0632493	0.104545	0.0221018	0.00433428	0.145163	0.261412	0.0744289	0.0592695	0.121392	0.226959	0.0677698	0.0742979	0.0792911	0.118465	0.0704885	0.052301	0.0796955	0.0520744	0.0435503	0.0636544	0.0609323	0.0663912	0.0546672	0.033497	0.0599716	0.0436729	0.0342757	0.0383688	0.0372306	0.0506689	0.0393241	0.0549621	0.0530176	0.0505245
0.0668244	0.0383867	0.126615	0.21492	0.278791	0.0589728	0.05138	0.0762228	0.136709	0.401628	0.42904	0.0315033	0.177919	0.0613963	0.120352	0.566571	0.103784	0.637671	0.0651254	0.145163	0.00433428	0.654787	0.14574	0.250047	0.624748	0.440707	0.22642	0.109235	0.330754	0.42309	0.132188	0.0607302	0.0879749	0.0605483	0.0400325	0.08181	0.0606783	0.073858	0.0698764	0.0547195	0.0602464	0.0581597	0.0389595	0.0371217	0.039056	0.0493162	0.0558542	0.0715119	0.0568415	0.102011
0.0990696	0.0847714	0.144103	0.295309	0.270035	0.0584908	0.0980236	0.0881637	0.113357	0.394436	0.296001	0.0298104	0.246382	0.0625032	0.0586109	0.678355	0.137135	0.290947	0.0484214	0.261412	0.654787	0.00433428	0.164519	0.154111	0.375748	0.632923	0.181817	0.131677	0.226992	0.403716	0.125115	0.0868487	0.129124	0.0862793	0.065732	0.121328	0.0949529	0.109396	0.0975885	0.070135	0.0956431	0.0771189	0.0557766	0.0582673	0.0547336	0.0752771	0.0670678	0.0979902	0.0887407	0.131338
0.190729	0.089216	0.371633	0.315939	0.416597	0.221221	0.0511027	0.443978	0.23123	0.211024	0.212763	0.0633502	0.0883238	0.419652	0.0755212	0.1557	0.460802	0.159675	0.208181	0.0744289	0.14574	0.164519	0.00433428	0.263366	0.267265	0.219588	0.660565	0.506478	0.437681	0.326951	0.410054	0.0584335	0.078988	0.0316501	0.0370684	0.0518284	0.0700878	0.0624373	0.0495979	0.0447592	0.0556746	0.0555199	0.0383412	0.0520328	0.0342186	0.0731499	0.0624859	0.059001	0.0612235	0.0983019
0.0665331	0.0278403	0.207289	0.150631	0.350784	0.164362	0.0218815	0.168953	0.278211	0.212607	0.389932	0.0630827	0.0729305	0.233994	0.242999	0.170378	0.238592	0.450145	0.353044	0.0592695	0.250047	0.154111	0.263366	0.00433428	0.636332	0.178839	0.442469	0.135812	0.696875	0.319077	0.220818	0.0522164	0.0668928	0.0235484	0.0304807	0.0388613	0.0514987	0.0471278	0.0473147	0.0491584	0.0434672	0.051896	0.0335793	0.036351	0.0318772	0.0471205	0.0492225	0.0519628	0.0450435	0.0750644
0.0819966	0.0379943	0.213977	0.264771	0.395832	0.114135	0.0403929	0.151404	0.193965	0.442872	0.47125	0.0435771	0.158954	0.140947	0.115291	0.395605	0.245052	0.438161	0.134467	0.121392	0.624748	0.375748	0.267265	0.636332	0.00433428	0.48243	0.425158	0.143935	0.818666	0.705947	0.266493	0.0739612	0.100661	0.0462306	0.0480135	0.0773735	0.0748902	0.0740219	0.0755731	0.0688756	0.0736425	0.0752112	0.0517267	0.0524281	0.0469807	0.0683283	0.0650898	0.084957	0.0795808	0.131548
0.125904	0.101075	0.195939	0.375041	0.345263	0.0648924	0.0966452	0.119977	0.141151	0.515622	0.312363	0.037635	0.241985	0.0832381	0.0528421	0.505022	0.213609	0.194617	0.0620964	0.226959	0.440707	0.632923	0.219588	0.178839	0.48243	0.00433428	0.26248	0.163742	0.329057	0.647027	0.199527	0.0999859	0.148487	0.0711673	0.0704186	0.116573	0.123247	0.128159	0.107187	0.0897408	0.118807	0.0937803	0.0817943	0.0850982	0.076922	0.100113	0.0903818	0.120417	0.119888	0.177799
0.145406	0.0552947	0.393606	0.338619	0.618573	0.223978	0.0402787	0.402436	0.307906	0.296127	0.367534	0.0544742	0.0978406	0.326536	0.102069	0.198108	0.415253	0.248304	0.227931	0.0677698	0.22642	0.181817	0.660565	0.442469	0.425158	0.26248	0.00433428	0.471216	0.790177	0.458119	0.539468	0.0627632	0.092711	0.0321678	0.0409094	0.0576279	0.0726049	0.0672681	0.0584036	0.0596039	0.0614609	0.062223	0.046458	0.0555235	0.0425039	0.0721082	0.079929	0.0763373	0.075059	0.14198
0.175404	0.145393	0.235653	0.249017	0.262678	0.106469	0.0747691	0.266896	0.139044	0.13762	0.137236	0.0328127	0.0800875	0.13984	0.057452	0.126304	0.189489	0.117424	0.0801191	0.0742979	0.109235	0.131677	0.506478	0.135812	0.143935	0.163742	0.471216	0.00433428	0.236426	0.213949	0.402947	0.0364321	0.0563537	0.0259723	0.0309986	0.0367081	0.0452235	0.0427635	0.0386219	0.0307204	0.0400298	0.0464656	0.0281349	0.0365953	0.0267452	0.0604921	0.0463674	0.0414211	0.0383307	0.0627422
0.0868552	0.0351718	0.260267	0.258188	0.467149	0.174459	0.0354621	0.244412	0.230273	0.353145	0.419473	0.0517912	0.124188	0.267334	0.11238	0.252849	0.360635	0.299629	0.233168	0.0792911	0.330754	0.226992	0.437681	0.696875	0.818666	0.329057	0.790177	0.236426	0.00433428	0.72144	0.450816	0.0618393	0.0808846	0.0312638	0.0378148	0.0530577	0.0657111	0.0583282	0.0593349	0.057633	0.0569949	0.0622694	0.0415474	0.047797	0.0361174	0.059843	0.0637704	0.0665455	0.0691512	0.133974
0.0952725	0.0505922	0.222931	0.315018	0.411397	0.0998555	0.0540954	0.165665	0.152852	0.467112	0.367834	0.0413525	0.197083	0.144614	0.0648968	0.367097	0.284081	0.221775	0.107711	0.118465	0.42309	0.403716	0.326951	0.319077	0.705947	0.647027	0.458119	0.213949	0.72144	0.00433428	0.346324	0.0884922	0.119843	0.0508687	0.0538115	0.0891054	0.100792	0.0958535	0.0927453	0.0916505	0.0918208	0.0902546	0.0631217	0.0656387	0.0563786	0.0791799	0.0836473	0.0955547	0.100161	0.180382
0.123482	0.0624415	0.227638	0.225037	0.289945	0.11639	0.0398744	0.316936	0.152519	0.187023	0.171524	0.0306453	0.0905812	0.171347	0.063188	0.146212	0.279066	0.125352	0.110284	0.0704885	0.132188	0.125115	0.410054	0.220818	0.266493	0.199527	0.539468	0.402947	0.450816	0.346324	0.00433428	0.0450379	0.0674294	0.0291724	0.0367693	0.0480585	0.0614602	0.0553915	0.0473859	0.0441328	0.0523933	0.0511219	0.03699	0.0465582	0.0382488	0.0828639	0.0592434	0.0617394	0.0624868	0.0892553
0.0755221	0.0524947	0.0871014	0.097118	0.104235	0.0353405	0.0393434	0.0659348	0.0535305	0.0849029	0.0601723	0.0299062	0.0637102	0.044183	0.0322405	0.0741637	0.108702	0.0494085	0.0391239	0.052301	0.0607302	0.0868487	0.0584335	0.0522164	0.0739612	0.0999859	0.0627632	0.0364321	0.0618393	0.0884922	0.0450379	0.00433428	0.740381	0.262115	0.188145	0.257648	0.453731	0.413582	0.312259	0.265928	0.273321	0.241569	0.156583	0.145338	0.115095	0.161726	0.150556	0.175493	0.17633	0.201831
0.0967935	0.0609298	0.119276	0.126081	0.145486	0.0447729	0.0494037	0.0867937	0.0741477	0.127378	0.0837184	0.0317065	0.0796392	0.0530042	0.0367951	0.117431	0.15081	0.066051	0.0453974	0.0796955	0.0879749	0.129124	0.078988	0.0668928	0.100661	0.148487	0.092711	0.0563537	0.0808846	0.119843	0.0674294	0.740381	0.00433428	0.298527	0.214723	0.302882	0.651184	0.581196	0.372672	0.300119	0.349275	0.305336	0.203429	0.199881	0.17643	0.220844	0.196459	0.260776	0.218512	0.254623
0.0418462	0.0334007	0.0486713	0.0601979	0.0583425	0.0243575	0.0337969	0.0335524	0.0377031	0.0571681	0.0379457	0.0140499	0.0586797	0.0260946	0.0179648	0.0742086	0.0559822	0.0408103	0.0235336	0.0520744	0.0605483	0.0862793	0.0316501	0.0235484	0.0462306	0.0711673	0.0321678	0.0259723	0.0312638	0.0508687	0.0291724	0.262115	0.298527	0.00433428	0.159315	0.302671	0.189512	0.295043	0.207203	0.144748	0.214746	0.130552	0.0867155	0.0814573	0.0805136	0.0908175	0.0728544	0.127127	0.135899	0.120547
0.0512774	0.0425978	0.0568217	0.0668161	0.0647802	0.0235161	0.0311049	0.0420085	0.0365481	0.0669167	0.041773	0.0254232	0.0463435	0.0245361	0.0267034	0.0572538	0.0671864	0.0311898	0.0243926	0.0435503	0.0400325	0.065732	0.0370684	0.0304807	0.0480135	0.0704186	0.0409094	0.0309986	0.0378148	0.0538115	0.0367693	0.188145	0.214723	0.159315	0.00433428	0.187848	0.155045	0.16803	0.352083	0.252362	0.244193	0.296537	0.248114	0.192709	0.200756	0.225696	0.169957	0.22624	0.160818	0.168705
0.064993	0.0493518	0.0731513	0.0953941	0.0982487	0.0328192	0.0409098	0.0538635	0.0486261	0.0976803	0.0635497	0.0186029	0.0720631	0.0311089	0.0220652	0.101295	0.0880301	0.0515544	0.0254012	0.0636544	0.08181	0.121328	0.0518284	0.0388613	0.0773735	0.116573	0.0576279	0.0367081	0.0530577	0.0891054	0.0480585	0.257648	0.302882	0.302671	0.187848	0.00433428	0.225717	0.3519	0.26479	0.180031	0.340385	0.172331	0.137332	0.127027	0.121332	0.143969	0.118406	0.193651	0.219493	0.194012
0.0829029	0.052596	0.103657	0.117055	0.123614	0.0404947	0.0413857	0.0826335	0.0641386	0.10949	0.0655116	0.0293997	0.0669488	0.0479446	0.0337828	0.0873607	0.15558	0.0487505	0.0364204	0.0609323	0.0606783	0.0949529	0.0700878	0.0514987	0.0748902	0.123247	0.0726049	0.0452235	0.0657111	0.100792	0.0614602	0.453731	0.651184	0.189512	0.155045	0.225717	0.00433428	0.467524	0.251939	0.249664	0.309137	0.261168	0.186703	0.162156	0.142396	0.184965	0.218637	0.197678	0.182279	0.23258
0.0778811	0.051911	0.0942535	0.115534	0.115877	0.0346364	0.0419514	0.0698357	0.056997	0.0999111	0.0605349	0.0272709	0.0727293	0.0460522	0.0299019	0.0999051	0.111799	0.0544393	0.0329561	0.0663912	0.073858	0.109396	0.0624373	0.0471278	0.0740219	0.128159	0.0672681	0.0427635	0.0583282	0.0958535	0.0553915	0.413582	0.581196	0.295043	0.16803	0.3519	0.467524	0.00433428	0.25874	0.215915	0.324027	0.192633	0.168869	0.141313	0.155064	0.147769	0.165268	0.217766	0.195845	0.221383
0.0652318	0.0365059	0.0706875	0.0866263	0.0968854	0.0286084	0.035844	0.0489673	0.0499912	0.094268	0.0620595	0.0257334	0.0560184	0.0363557	0.033581	0.0874728	0.091724	0.0490437	0.0277575	0.0546672	0.0698764	0.0975885	0.0495979	0.0473147	0.0755731	0.107187	0.0584036	0.0386219	0.0593349	0.0927453	0.0473859	0.312259	0.372672	0.207203	0.352083	0.26479	0.251939	0.25874	0.00433428	0.46229	0.342398	0.404306	0.338684	0.28049	0.275086	0.263537	0.247382	0.357519	0.193929	0.250126
0.0547001	0.0294623	0.0697389	0.0751707	0.0864936	0.0320263	0.025623	0.0517036	0.0464713	0.0877799	0.054476	0.0247582	0.0394719	0.0371168	0.026385	0.0636494	0.0879791	0.0363937	0.032396	0.033497	0.0547195	0.070135	0.0447592	0.0491584	0.0688756	0.0897408	0.0596039	0.0307204	0.057633	0.0916505	0.0441328	0.265928	0.300119	0.144748	0.252362	0.180031	0.249664	0.215915	0.46229	0.00433428	0.254312	0.439916	0.480226	0.30665	0.329493	0.206566	0.340394	0.387777	0.176477	0.340705
0.075775	0.0492779	0.0875944	0.105787	0.108687	0.0329037	0.0350351	0.064123	0.0509514	0.108425	0.0611371	0.028863	0.0614158	0.0393424	0.0320262	0.0931119	0.122745	0.043912	0.0292151	0.0599716	0.0602464	0.0956431	0.0556746	0.0434672	0.0736425	0.118807	0.0614609	0.0400298	0.0569949	0.0918208	0.0523933	0.273321	0.349275	0.214746	0.244193	0.340385	0.309137	0.324027	0.342398	0.254312	0.00433428	0.43583	0.204517	0.176603	0.154096	0.351989	0.173833	0.230906	0.278736	0.240255
0.0675006	0.0382601	0.0770583	0.0862597	0.0920602	0.033096	0.0269835	0.0669403	0.0521591	0.0926886	0.0540562	0.0226349	0.0451145	0.0370868	0.0303525	0.0736475	0.108312	0.0453559	0.0314463	0.0436729	0.0581597	0.0771189	0.0555199	0.051896	0.0752112	0.0937803	0.062223	0.0464656	0.0622694	0.0902546	0.0511219	0.241569	0.305336	0.130552	0.296537	0.172331	0.261168	0.192633	0.404306	0.439916	0.43583	0.00433428	0.342858	0.288274	0.221379	0.446736	0.273279	0.27963	0.18071	0.250969
0.0552704	0.0353308	0.0619241	0.0725956	0.0739461	0.025135	0.0232772	0.0473107	0.0425843	0.0755912	0.0460435	0.0302271	0.0323185	0.0301624	0.0272628	0.0559781	0.0841816	0.0314775	0.0273396	0.0342757	0.0389595	0.0557766	0.0383412	0.0335793	0.0517267	0.0817943	0.046458	0.0281349	0.0415474	0.0631217	0.03699	0.156583	0.203429	0.0867155	0.248114	0.137332	0.186703	0.168869	0.338684	0.480226	0.204517	0.342858	0.00433428	0.71778	0.913562	0.280479	0.599567	0.637861	0.169257	0.330765
0.0631034	0.042593	0.0702706	0.0774418	0.0879632	0.0287347	0.0238827	0.0608097	0.045779	0.0849562	0.0517569	0.0313034	0.0352837	0.0389609	0.0254606	0.0601834	0.109201	0.0294693	0.0280195	0.0383688	0.0371217	0.0582673	0.0520328	0.036351	0.0524281	0.0850982	0.0555235	0.0365953	0.047797	0.0656387	0.0465582	0.145338	0.199881	0.0814573	0.192709	0.127027	0.162156	0.141313	0.28049	0.30665	0.176603	0.288274	0.71778	0.00433428	0.712586	0.307304	0.405017	0.572877	0.149834	0.212602
0.0473902	0.0322964	0.054846	0.062099	0.0689163	0.0217031	0.0222215	0.0447805	0.038004	0.0707278	0.0448573	0.0252621	0.0296762	0.0285284	0.0232642	0.0603852	0.0730229	0.0335756	0.0211501	0.0372306	0.039056	0.0547336	0.0342186	0.0318772	0.0469807	0.076922	0.0425039	0.0267452	0.0361174	0.0563786	0.0382488	0.115095	0.17643	0.0805136	0.200756	0.121332	0.142396	0.155064	0.275086	0.329493	0.154096	0.221379	0.913562	0.712586	0.00433428	0.222653	0.502216	0.865987	0.140632	0.266803
0.0970433	0.0511615	0.0971597	0.100858	0.110861	0.0333474	0.026391	0.108319	0.0577653	0.103337	0.0646272	0.0348655	0.0474676	0.0473611	0.0397946	0.0722324	0.161233	0.0457559	0.0333928	0.0506689	0.0493162	0.0752771	0.0731499	0.0471205	0.0683283	0.100113	0.0721082	0.0604921	0.059843	0.0791799	0.0828639	0.161726	0.220844	0.0908175	0.225696	0.143969	0.184965	0.147769	0.263537	0.206566	0.351989	0.446736	0.280479	0.307304	0.222653	0.00433428	0.253447	0.335203	0.204664	0.240595
0.0636373	0.0349394	0.0779746	0.0882341	0.091373	0.0308068	0.0275109	0.0748859	0.0488677	0.083765	0.0548096	0.0300094	0.0374349	0.0446781	0.0290965	0.0651733	0.112298	0.0468904	0.0341683	0.0393241	0.0558542	0.0670678	0.0624859	0.0492225	0.0650898	0.0903818	0.079929	0.0463674	0.0637704	0.0836473	0.0592434	0.150556	0.196459	0.0728544	0.169957	0.118406	0.218637	0.165268	0.247382	0.340394	0.173833	0.273279	0.599567	0.405017	0.502216	0.253447	0.00433428	0.621418	0.161249	0.405835
0.0646235	0.0385516	0.0861569	0.0938442	0.10757	0.0354152	0.0280188	0.0662721	0.0601689	0.106155	0.0685202	0.0290714	0.0468872	0.0483219	0.0296389	0.0975876	0.115453	0.055495	0.0358646	0.0549621	0.0715119	0.0979902	0.059001	0.0519628	0.084957	0.120417	0.0763373	0.0414211	0.0665455	0.0955547	0.0617394	0.175493	0.260776	0.127127	0.22624	0.193651	0.197678	0.217766	0.357519	0.387777	0.230906	0.27963	0.637861	0.572877	0.865987	0.335203	0.621418	0.00433428	0.21431	0.452707
0.0739523	0.0462451	0.0844141	0.0990378	0.110304	0.0347995	0.0315597	0.0671695	0.0492631	0.101564	0.0662767	0.0259484	0.0568954	0.0429198	0.0301548	0.0854233	0.109938	0.0405301	0.0348954	0.0530176	0.0568415	0.0887407	0.0612235	0.0450435	0.0795808	0.119888	0.075059	0.0383307	0.0691512	0.100161	0.0624868	0.17633	0.218512	0.135899	0.160818	0.219493	0.182279	0.195845	0.193929	0.176477	0.278736	0.18071	0.169257	0.149834	0.140632	0.204664	0.161249	0.21431	0.00433428	0.27651
0.0727492	0.0381698	0.117362	0.124762	0.162565	0.0442232	0.0331687	0.0986366	0.0688384	0.160786	0.100502	0.0345283	0.0593596	0.0707791	0.0339165	0.116121	0.166471	0.0606622	0.0556311	0.0505245	0.102011	0.131338	0.0983019	0.0750644	0.131548	0.177799	0.14198	0.0627422	0.133974	0.180382	0.0892553	0.201831	0.254623	0.120547	0.168705	0.194012	0.23258	0.221383	0.250126	0.340705	0.240255	0.250969	0.330765	0.212602	0.266803	0.240595	0.405835	0.452707	0.27651	0.00433428
0.0796719	0.0378989	0.116868	0.111263	0.151766	0.0490823	0.0281994	0.101931	0.0810639	0.14107	0.0963475	0.0335574	0.0531538	0.0750187	0.0314804	0.107907	0.186625	0.0579574	0.0482619	0.0593963	0.0714407	0.106265	0.0991511	0.0817819	0.121142	0.14847	0.11811	0.0545628	0.113519	0.13117	0.0882846	0.170348	0.254662	0.118633	0.169762	0.188813	0.195693	0.17531	0.247718	0.206445	0.302749	0.239579	0.262228	0.32653	0.242745	0.400355	0.255134	0.470675	0.273555	0.429581
0.0903722	0.0428571	0.108525	0.110019	0.140116	0.0448004	0.0273311	0.10453	0.0752166	0.124816	0.0925175	0.0330785	0.0528426	0.0653155	0.0340161	0.093995	0.189533	0.0528954	0.0369358	0.0579986	0.0572226	0.0853658	0.0929242	0.0753193	0.103139	0.130311	0.104398	0.0557216	0.101396	0.111702	0.105242	0.136355	0.202467	0.089385	0.141562	0.15503	0.159871	0.1335	0.179822	0.124946	0.309417	0.211685	0.171472	0.24331	0.1591	0.506724	0.167583	0.26964	0.246798	0.238836
0.0645575	0.0336876	0.0775295	0.0839393	0.100448	0.033663	0.0232415	0.0733038	0.051264	0.10355	0.0679559	0.0300634	0.0417138	0.0450815	0.031295	0.0816711	0.121576	0.0450587	0.0325093	0.0500157	0.0519076	0.0752074	0.0655085	0.0520512	0.0820074	0.106938	0.0796708	0.0415222	0.070964	0.0828129	0.0706908	0.11091	0.175238	0.0829377	0.12527	0.149104	0.139018	0.131248	0.151581	0.124802	0.247125	0.155031	0.181955	0.179194	0.177649	0.298761	0.165674	0.294877	0.27257	0.29849
0.0583692	0.0433633	0.0621865	0.082258	0.0832351	0.0229455	0.0330284	0.0524182	0.0420573	0.0813253	0.0596883	0.0182495	0.0546728	0.0303575	0.0190461	0.0790665	0.0856517	0.0390044	0.0238169	0.0506633	0.0570435	0.0843699	0.0592983	0.0370016	0.0723239	0.110855	0.0639896	0.0555745	0.0621014	0.106366	0.0620078	0.114101	0.144684	0.0921454	0.0893684	0.155662	0.128559	0.127553	0.127338	0.107298	0.146937	0.100766	0.100908	0.100036	0.094142	0.109106	0.0872394	0.126755	0.210544	0.149238
0.0621747	0.039352	0.0652323	0.0715612	0.0723786	0.0236401	0.0308112	0.0548974	0.0375967	0.0740241	0.0454954	0.0326442	0.0378246	0.0321789	0.0346492	0.0611126	0.0888097	0.0273278	0.0250754	0.0353855	0.0335391	0.0576349	0.0420526	0.0291518	0.0529768	0.0862668	0.0495947	0.0326366	0.0427142	0.0682842	0.0483336	0.105578	0.144949	0.0734324	0.094772	0.152142	0.136346	0.136982	0.114662	0.107728	0.175379	0.111218	0.1622	0.147859	0.156634	0.168819	0.153684	0.187768	0.301427	0.213802
0.0593113	0.0306248	0.0679252	0.0743188	0.080391	0.0327202	0.0243519	0.049267	0.0464306	0.0774366	0.0503857	0.0312438	0.0375462	0.039256	0.0344843	0.0612068	0.0910836	0.0399026	0.0357438	0.0327943	0.0496316	0.0634425	0.0499062	0.0443339	0.0694607	0.0803243	0.0604965	0.0332828	0.0582226	0.0814253	0.048045	0.157627	0.179491	0.106666	0.146622	0.170014	0.164191	0.154398	0.17988	0.241706	0.246908	0.216982	0.222145	0.129064	0.146739	0.197872	0.240114	0.218892	0.333119	0.325695
0.0814595	0.0375257	0.0976432	0.102283	0.117577	0.0427267	0.0274298	0.0880697	0.0657717	0.111564	0.0753744	0.0374635	0.0475981	0.054644	0.0392132	0.0860784	0.152797	0.051958	0.0406569	0.0533673	0.0547373	0.0827716	0.0762133	0.054798	0.0875673	0.118018	0.0883632	0.0445338	0.0804104	0.0913871	0.0817911	0.135911	0.209096	0.0904395	0.149278	0.164852	0.174512	0.15185	0.1759	0.148052	0.310743	0.209915	0.221904	0.212746	0.184416	0.402089	0.230918	0.304604	0.333745	0.386578
0.0843211	0.0394594	0.120401	0.119389	0.1488	0.0533303	0.0274591	0.159043	0.0847431	0.136494	0.102055	0.029505	0.0590622	0.0723562	0.0352709	0.101235	0.220117	0.0578383	0.0411747	0.0548593	0.0730065	0.0986733	0.131371	0.0871305	0.123278	0.138348	0.146323	0.0986907	0.149554	0.168019	0.17488	0.115982	0.155838	0.0746267	0.104019	0.119502	0.146663	0.117415	0.12666	0.114625	0.26279	0.203179	0.107447	0.126219	0.0957456	0.317058	0.116692	0.147624	0.202529	0.175417
0.0756693	0.0400828	0.0957322	0.0956032	0.118881	0.0464529	0.0266092	0.0880278	0.070992	0.115677	0.0814448	0.0318393	0.0446928	0.0565802	0.0343212	0.0989109	0.150944	0.0563782	0.0414448	0.0566339	0.0635871	0.0941519	0.0762653	0.0629446	0.100568	0.123482	0.0916843	0.0475101	0.0894545	0.1043	0.079318	0.143297	0.213281	0.10745	0.133486	0.209706	0.169104	0.166899	0.180573	0.146067	0.286763	0.175235	0.188474	0.207551	0.19012	0.296686	0.184175	0.344375	0.331045	0.330838
0.0956404	0.0454557	0.133703	0.12886	0.172319	0.0586394	0.0293568	0.133882	0.0913856	0.149488	0.116874	0.0368447	0.065541	0.0845195	0.0361418	0.110277	0.238778	0.0609904	0.0506874	0.0659055	0.0693353	0.110374	0.119082	0.0961127	0.133404	0.154326	0.136198	0.0739817	0.14592	0.162099	0.136239	0.141747	0.208082	0.0977786	0.122766	0.181747	0.18168	0.163052	0.175561	0.151493	0.303982	0.202013	0.163081	0.204159	0.154513	0.333613	0.164803	0.249034	0.293818	0.284349
0.076011	0.0363782	0.0699792	0.0828608	0.087742	0.0308669	0.0228827	0.0812569	0.0505844	0.0815104	0.0557711	0.0337734	0.0398471	0.031064	0.0305214	0.0647228	0.12349	0.040379	0.0279999	0.0380873	0.0451653	0.0587709	0.0625727	0.0376543	0.0624917	0.0824813	0.0664221	0.0513527	0.0612838	0.0713199	0.0892875	0.102413	0.144502	0.0682464	0.124277	0.105658	0.134674	0.104649	0.110764	0.116011	0.251477	0.20389	0.153102	0.118861	0.108353	0.333836	0.146259	0.153323	0.232718	0.181893
0.0605648	0.0357762	0.0681043	0.0720894	0.0838686	0.0318728	0.0277336	0.0580685	0.047773	0.0840071	0.0557405	0.0295911	0.0363846	0.0415259	0.0268067	0.0719295	0.0984874	0.0406877	0.0362091	0.042046	0.0493225	0.0742448	0.0521463	0.0370974	0.0655556	0.0958198	0.0669207	0.0355711	0.0559815	0.0796926	0.0545706	0.117842	0.178352	0.0861406	0.111999	0.167314	0.154846	0.149643	0.153034	0.159847	0.193598	0.143991	0.180705	0.142797	0.161787	0.177045	0.182229	0.252604	0.295421	0.32139
0.0565396	0.0282591	0.0922427	0.0790673	0.102334	0.0598977	0.0239304	0.096886	0.0742257	0.0952948	0.0846657	0.0264634	0.0505956	0.0691173	0.0408408	0.0846455	0.137711	0.0580227	0.0534402	0.049973	0.0642723	0.0889386	0.0891659	0.0988338	0.125957	0.11408	0.10887	0.0691322	0.130594	0.139293	0.117211	0.0935518	0.132728	0.0729664	0.0687371	0.12658	0.102981	0.0994586	0.0991134	0.0873154	0.132929	0.101878	0.088627	0.115203	0.0971005	0.136655	0.0862429	0.134052	0.14217	0.131187
0.0559559	0.0338672	0.0748324	0.0740129	0.0843488	0.0319107	0.0216178	0.065625	0.0478464	0.0807622	0.0576727	0.0284308	0.0406028	0.0397802	0.02834	0.0682692	0.113866	0.0344597	0.0312501	0.0395106	0.040248	0.0665508	0.0545538	0.0418826	0.0704365	0.0985083	0.0681982	0.0402313	0.0593401	0.0804625	0.0636006	0.0902914	0.133788	0.0715979	0.0799068	0.131709	0.114147	0.110735	0.0988547	0.094791	0.152844	0.112202	0.139374	0.147958	0.14479	0.166086	0.134803	0.186368	0.225389	0.187081
0.0532615	0.0339732	0.0530733	0.0656863	0.0699654	0.0252254	0.0219556	0.0508403	0.0408169	0.0696831	0.0522786	0.0262116	0.0342442	0.0301657	0.0254556	0.0586917	0.0907689	0.0348237	0.0264555	0.0320596	0.0467935	0.0631077	0.0492224	0.03589	0.0641654	0.0800102	0.0535833	0.0357107	0.0536489	0.078428	0.0478158	0.128912	0.155276	0.0794857	0.121074	0.127345	0.136545	0.116018	0.131687	0.156011	0.209888	0.182289	0.152422	0.112694	0.112265	0.1983	0.152022	0.163463	0.236478	0.214955
0.0597419	0.0311304	0.0857834	0.0834846	0.107002	0.0395852	0.0272912	0.0751149	0.0652037	0.106646	0.0761121	0.0288709	0.0495278	0.0610983	0.0355914	0.0984194	0.121829	0.0653906	0.0489331	0.0526036	0.0833886	0.108263	0.07578	0.0635002	0.102064	0.125922	0.090724	0.0455284	0.0869412	0.115423	0.0675533	0.157824	0.21675	0.138463	0.123245	0.241659	0.170038	0.188693	0.191526	0.181237	0.234323	0.160085	0.186088	0.160248	0.186692	0.177257	0.172717	0.335368	0.291825	0.326155
0.0642598	0.0282705	0.0909531	0.0820661	0.108878	0.0569625	0.0229676	0.095135	0.0782872	0.103154	0.091806	0.0298956	0.0491086	0.0657342	0.043485	0.087215	0.155684	0.0592222	0.0539336	0.0509635	0.0696401	0.0946992	0.0869217	0.0949224	0.122604	0.118146	0.10322	0.0627776	0.117614	0.13185	0.100435	0.117457	0.15286	0.0835076	0.0877188	0.156275	0.13297	0.112964	0.131043	0.112079	0.206998	0.136557	0.103176	0.117715	0.0963706	0.174697	0.0938663	0.152548	0.17838	0.157171
0.0538604	0.0327229	0.0691884	0.0757497	0.0765178	0.0311167	0.0208526	0.0638637	0.0472316	0.0725096	0.0471329	0.0327552	0.0322171	0.0417898	0.0313425	0.066451	0.0993609	0.0391357	0.03478	0.0354462	0.0407066	0.0627996	0.0499111	0.0443235	0.0639996	0.0868394	0.0668894	0.0400943	0.0559257	0.0689515	0.0670846	0.0768503	0.115471	0.0596145	0.069482	0.115079	0.10129	0.094737	0.0894176	0.0768557	0.128831	0.0905507	0.12065	0.127495	0.12739	0.146517	0.129737	0.167745	0.190979	0.180491
0.190442	0.0673088	0.14845	0.0912416	0.0996653	0.0684809	0.0268512	0.171834	0.0648982	0.0645184	0.051375	0.0214642	0.0408042	0.0779121	0.0255433	0.0548154	0.158584	0.032726	0.0295447	0.0397732	0.035811	0.0562925	0.0982919	0.0424053	0.0531306	0.0775642	0.0700103	0.0891907	0.0546891	0.067587	0.0780284	0.0598272	0.08652	0.0314817	0.0509193	0.0535154	0.0838333	0.0661181	0.0551891	0.0551447	0.0684174	0.0786943	0.0523168	0.0630641	0.0458288	0.106332	0.0652887	0.0621411	0.0635193	0.0617242
0.195413	0.0952079	0.250182	0.114078	0.138882	0.157352	0.0275135	0.417071	0.108885	0.0707703	0.0731496	0.047039	0.0476171	0.138948	0.054975	0.0683433	0.220094	0.0579482	0.0602522	0.0478828	0.0485791	0.0710853	0.199942	0.0663869	0.0701671	0.0809248	0.15282	0.248033	0.0932087	0.0881759	0.224167	0.0531232	0.0791963	0.0295399	0.0482874	0.0510141	0.0763888	0.0585865	0.0460368	0.0468082	0.0576475	0.070566	0.0435819	0.0524534	0.040412	0.105466	0.0616216	0.0571654	0.0525406	0.0650446
0.112321	0.0718474	0.108182	0.0787217	0.0852507	0.0491358	0.0264719	0.22059	0.0547586	0.0579462	0.0474308	0.020115	0.0371824	0.067528	0.0256375	0.0511873	0.189629	0.035757	0.0317046	0.037752	0.0351115	0.0581475	0.145011	0.0496264	0.0516735	0.065726	0.0968802	0.229193	0.0776698	0.0769723	0.183127	0.0611988	0.08216	0.0333654	0.053724	0.0459973	0.0889215	0.0662822	0.0564	0.065241	0.0757104	0.104914	0.0500422	0.0515436	0.0408386	0.150203	0.0606807	0.0559264	0.0547542	0.0634344
0.135752	0.0996422	0.153265	0.14909	0.149304	0.0641841	0.0529639	0.159439	0.0785979	0.12718	0.083313	0.0273207	0.0672979	0.0851551	0.0300147	0.0937847	0.351902	0.0532241	0.0373388	0.0803727	0.0598002	0.107763	0.18398	0.0705464	0.101664	0.15907	0.110564	0.137745	0.0997138	0.125676	0.121935	0.112575	0.154516	0.0601875	0.0737384	0.0910334	0.165217	0.117767	0.0965326	0.0935498	0.135078	0.129771	0.0968023	0.106394	0.084281	0.155218	0.108442	0.109785	0.107909	0.116041
0.14668	0.0703644	0.193184	0.154943	0.182749	0.0950813	0.0318047	0.324369	0.106442	0.0897464	0.0791573	0.0323967	0.0502021	0.126914	0.0366436	0.0677256	0.179182	0.0753704	0.0748746	0.0432983	0.0752367	0.0708791	0.290351	0.0819175	0.0962912	0.0953049	0.337181	0.425674	0.15142	0.125749	0.359687	0.0360038	0.0534216	0.0217954	0.0325825	0.0385279	0.0505856	0.0483145	0.0353416	0.0314762	0.0396526	0.0416411	0.0293839	0.0364494	0.0293945	0.0807663	0.0563417	0.041067	0.0416459	0.0681177
0.0781687	0.0432321	0.0609235	0.0734236	0.0730943	0.032169	0.0255597	0.116096	0.0424872	0.0589635	0.0439035	0.0198588	0.0398932	0.0314358	0.0210234	0.0428298	0.103443	0.0327371	0.0207445	0.0355207	0.0352831	0.0526444	0.062286	0.0336684	0.0456369	0.0582146	0.0548411	0.101189	0.0456174	0.0557353	0.107614	0.0875733	0.106418	0.0515523	0.118652	0.0739502	0.105814	0.0790565	0.0973545	0.0992931	0.147371	0.237033	0.0926469	0.0903256	0.0658641	0.387889	0.101492	0.0850616	0.0873977	0.096401
0.133561	0.067685	0.149187	0.150994	0.165332	0.0676958	0.0270844	0.246562	0.0953327	0.0995265	0.0853488	0.0260502	0.046893	0.0857547	0.040162	0.069193	0.165259	0.070618	0.0575179	0.0480707	0.0636656	0.0695804	0.273801	0.0842736	0.101623	0.0964043	0.271598	0.355155	0.144435	0.127722	0.4098	0.0424888	0.0589734	0.0263293	0.037711	0.0406174	0.0520462	0.0456651	0.0383658	0.0379138	0.0451976	0.0534804	0.0351017	0.0381166	0.0301418	0.0897589	0.0527305	0.043686	0.0476144	0.0625416
0.101496	0.0516105	0.101519	0.10717	0.119775	0.0367268	0.0244975	0.144999	0.064589	0.105987	0.0717104	0.0264433	0.0505301	0.0443918	0.0285071	0.0739827	0.170508	0.04242	0.0259339	0.0512201	0.0469412	0.0717908	0.07776	0.0496833	0.0742542	0.097065	0.0855388	0.0799893	0.0730439	0.0815146	0.118192	0.113343	0.163182	0.0656618	0.147629	0.103841	0.149316	0.113885	0.14391	0.111661	0.280046	0.281564	0.140584	0.161204	0.111647	0.658617	0.141179	0.156971	0.163669	0.159826
0.0606823	0.0359965	0.0565301	0.0550783	0.0588382	0.0306054	0.0194802	0.110819	0.0329498	0.0441997	0.0361121	0.021025	0.0297169	0.0339806	0.0171494	0.0342857	0.0738413	0.0350663	0.0282156	0.0289212	0.0333603	0.0393669	0.0829135	0.0265631	0.0403892	0.0473326	0.0814716	0.155899	0.0442248	0.0535167	0.125154	0.0457597	0.0624595	0.02862	0.0488437	0.0384748	0.0548511	0.0471772	0.0441287	0.0478819	0.0487537	0.0734045	0.0427011	0.0345339	0.0347214	0.106281	0.0563528	0.0430261	0.04516	0.0534266
0.0967486	0.0370476	0.133616	0.117577	0.140047	0.0541853	0.0241299	0.189249	0.0665329	0.0874314	0.0671488	0.0297676	0.0415258	0.0871338	0.0282391	0.0604466	0.153742	0.0627226	0.0578648	0.0362327	0.0651096	0.0639943	0.202322	0.0768107	0.0959417	0.0869863	0.244658	0.227969	0.133319	0.12713	0.240494	0.0544554	0.0657038	0.0278061	0.0399848	0.0443003	0.0570228	0.0528625	0.0503014	0.0506553	0.0521488	0.0640714	0.0456105	0.0398425	0.0357994	0.080905	0.0677111	0.049838	0.0482728	0.0829124
0.10731	0.0520943	0.114225	0.111805	0.136096	0.0438613	0.0315674	0.1646	0.0730865	0.118556	0.0878218	0.0281108	0.0564586	0.0571918	0.026897	0.0841472	0.211663	0.049472	0.0345703	0.0594465	0.0549692	0.0889674	0.0980149	0.0643672	0.0942172	0.115223	0.112243	0.0915343	0.0946175	0.101147	0.154666	0.110006	0.161297	0.0670772	0.128375	0.11446	0.150207	0.112983	0.131858	0.111695	0.261364	0.240448	0.129818	0.149971	0.106164	0.562339	0.137235	0.159042	0.17451	0.162957
0.0959527	0.0418667	0.124588	0.105219	0.139238	0.0525425	0.0245774	0.240259	0.0749221	0.096163	0.0804288	0.0266152	0.0426352	0.0826799	0.0308194	0.072303	0.202251	0.0646208	0.0520885	0.0408878	0.0675323	0.0731644	0.181964	0.0798424	0.0950916	0.0859861	0.21705	0.183864	0.136203	0.122028	0.284614	0.0615967	0.0844897	0.0349855	0.0555034	0.0569012	0.080508	0.0639482	0.0634207	0.0611917	0.0841538	0.104766	0.0649027	0.0693273	0.0536702	0.213022	0.0936291	0.0740339	0.0828354	0.0967108
0.076526	0.0589373	0.0984415	0.0996515	0.102383	0.0520246	0.0229731	0.171785	0.067463	0.0737178	0.0680807	0.0240268	0.0456742	0.0602898	0.0516467	0.0647897	0.117355	0.0647643	0.0616675	0.0414325	0.0546021	0.0588277	0.216006	0.0952632	0.0937574	0.0877358	0.208859	0.372549	0.153123	0.132415	0.489219	0.0313623	0.0436049	0.0249666	0.0255548	0.0292846	0.0351255	0.0326352	0.0329567	0.0306322	0.0341014	0.040326	0.0239053	0.025679	0.022826	0.0622202	0.0329404	0.0356601	0.0359961	0.0433122
0.0821221	0.0350122	0.136576	0.109962	0.149882	0.064609	0.0254076	0.238807	0.0868479	0.100638	0.0908925	0.0211866	0.0493717	0.102366	0.036808	0.0817309	0.210084	0.0728724	0.0663093	0.0438752	0.0711925	0.0754976	0.219961	0.111413	0.11538	0.0932404	0.25067	0.213203	0.197031	0.143331	0.356902	0.0503449	0.0739521	0.0334063	0.0455767	0.0507947	0.0641969	0.0560824	0.0559435	0.0524065	0.0672589	0.0760966	0.0507786	0.0615486	0.0442706	0.14102	0.0676327	0.0624358	0.0654723	0.0810936
0.0498274	0.0482599	0.057432	0.0656931	0.0647635	0.0444018	0.0251092	0.0857394	0.0536967	0.0582937	0.0628107	0.0231864	0.0435771	0.0400081	0.0566118	0.0610864	0.077798	0.0548072	0.0424731	0.038678	0.0483915	0.0534532	0.121308	0.0930436	0.0901267	0.0719286	0.105677	0.210928	0.122024	0.12995	0.221132	0.0307054	0.0381888	0.0217416	0.0269182	0.0244996	0.0338525	0.0249915	0.0345825	0.0311474	0.0308733	0.0398789	0.0224236	0.0221039	0.0195116	0.0419786	0.0262003	0.0265694	0.0288646	0.0315958
0.072658	0.0436791	0.106193	0.107455	0.123626	0.0503626	0.0279289	0.157246	0.0757994	0.106384	0.0861809	0.0249394	0.0523771	0.0708904	0.0369295	0.0848762	0.175128	0.0613718	0.0507651	0.0465318	0.0703155	0.0752816	0.171093	0.100623	0.125422	0.105805	0.18787	0.163405	0.177795	0.164941	0.262528	0.0613043	0.0787213	0.0388168	0.0561583	0.0521364	0.0741565	0.0587813	0.0642865	0.062847	0.0997501	0.0994972	0.0527036	0.0592454	0.0437094	0.1613	0.0601086	0.0661519	0.0799293	0.0802792
0.0411809	0.0276789	0.0553193	0.0544026	0.0632264	0.0404286	0.0214753	0.0691713	0.0526669	0.0664023	0.0637218	0.0254737	0.0382038	0.0449799	0.0380749	0.0653891	0.0887697	0.0478314	0.0416963	0.0367538	0.0557315	0.0634498	0.069336	0.0783659	0.0936823	0.0783532	0.0769348	0.0647131	0.0988963	0.10823	0.107606	0.0595092	0.0723064	0.0415482	0.0458308	0.0583917	0.066202	0.0532851	0.0575995	0.0534627	0.0937628	0.0866323	0.0409052	0.0481316	0.0366702	0.0985671	0.0402965	0.0531674	0.0667073	0.0575637
0.0773452	0.0407371	0.0924751	0.105737	0.111147	0.0345403	0.0270974	0.102289	0.0567468	0.0841136	0.0613954	0.0231028	0.0448437	0.0447496	0.0240245	0.0733237	0.125813	0.0628216	0.0335485	0.0402423	0.079334	0.0845866	0.105979	0.0506459	0.0763135	0.0945448	0.11563	0.108655	0.0862491	0.0985243	0.109368	0.107397	0.139151	0.0577958	0.0773047	0.0777332	0.16613	0.111586	0.0995718	0.139639	0.127823	0.177867	0.114966	0.0711612	0.0711074	0.146267	0.177484	0.105183	0.114936	0.230635
0.0720431	0.0633158	0.0480044	0.0768959	0.0626988	0.0194698	0.0293426	0.073054	0.0374129	0.0498782	0.0395683	0.0186126	0.0400577	0.0224906	0.0199035	0.0522477	0.0545744	0.03474	0.0214331	0.0350733	0.0399014	0.0546557	0.0801035	0.0246734	0.0380823	0.0599765	0.0750566	0.175446	0.0405417	0.0567783	0.124473	0.0445782	0.0661251	0.0277428	0.0477063	0.0391316	0.0588698	0.0470744	0.0435929	0.0469165	0.0586298	0.0737299	0.0570117	0.0455297	0.0429379	0.104738	0.0674843	0.0519775	0.057701	0.0675879
0.0714215	0.0340059	0.0735323	0.0947323	0.0963904	0.0274425	0.0220516	0.0917097	0.0429629	0.0757228	0.0549722	0.0240202	0.038772	0.0367427	0.0245635	0.0599818	0.107746	0.0437297	0.0277967	0.0299253	0.0604025	0.066701	0.0944658	0.0388397	0.0645142	0.0739946	0.102116	0.0948566	0.0676454	0.0855343	0.100499	0.0879275	0.105647	0.0532068	0.0819459	0.0682883	0.099946	0.0799734	0.078267	0.101067	0.130306	0.145729	0.0895642	0.0617836	0.0556261	0.165571	0.10103	0.0783404	0.12232	0.145326
0.043822	0.0578322	0.0242736	0.0487763	0.0388478	0.0201968	0.0195106	0.0386245	0.0236929	0.0302806	0.0261498	0.0179635	0.025296	0.019739	0.0172549	0.0327674	0.0339516	0.0265986	0.0180578	0.027081	0.028192	0.0353451	0.036075	0.0196857	0.0291074	0.0397435	0.038896	0.110654	0.0267913	0.0375371	0.0790502	0.0404088	0.0471336	0.0276798	0.0405884	0.0304448	0.0461617	0.0333358	0.0350694	0.0416703	0.0541098	0.0694952	0.0420731	0.0311894	0.0278322	0.0802402	0.0479219	0.036835	0.0442578	0.0459302
0.0677654	0.0404115	0.0407711	0.052624	0.0447367	0.0203625	0.0198642	0.0751013	0.0250529	0.0323425	0.0255421	0.0221629	0.0306166	0.0246696	0.0193455	0.0324311	0.0498458	0.0321252	0.024625	0.0278338	0.0321308	0.0410377	0.0430589	0.0212407	0.0291608	0.0370545	0.0430472	0.0806967	0.0259251	0.0321893	0.05884	0.0810391	0.0874735	0.0403176	0.12053	0.0476849	0.101685	0.0683403	0.0825706	0.0991594	0.0925506	0.178723	0.125391	0.0684823	0.065406	0.193401	0.122687	0.0728655	0.0647482	0.0836429
0.0838801	0.03444	0.0809615	0.0893645	0.0869123	0.0251571	0.0245386	0.118449	0.0478474	0.0584372	0.0408797	0.0234775	0.0389524	0.0340721	0.0209772	0.0516448	0.0958341	0.0418641	0.0240462	0.0321054	0.0495587	0.0582965	0.0703679	0.0333928	0.0492071	0.0661291	0.0800387	0.0913245	0.0496714	0.0648044	0.105789	0.0977539	0.120644	0.0459398	0.102552	0.0595936	0.123926	0.0911474	0.0934234	0.130803	0.114432	0.198164	0.137917	0.104894	0.0879443	0.224536	0.244116	0.110182	0.0867588	0.152464
0.0631367	0.0352986	0.077785	0.0873702	0.0989532	0.0326876	0.0282534	0.0670687	0.0521532	0.09273	0.0586274	0.0245405	0.052496	0.0370317	0.0275625	0.0693663	0.127524	0.0422414	0.0318356	0.0360734	0.0606725	0.0806239	0.062327	0.0510157	0.0736542	0.0913382	0.0666131	0.0480477	0.0654388	0.102569	0.0484948	0.315883	0.343795	0.191795	0.192	0.238087	0.434892	0.288964	0.285323	0.323267	0.422156	0.438494	0.166431	0.115084	0.103265	0.225344	0.165686	0.155391	0.191591	0.221218
0.0476921	0.0305519	0.0501189	0.0550191	0.0654091	0.0274407	0.0257643	0.0445962	0.0345956	0.0514545	0.0358761	0.0216443	0.029894	0.0302847	0.0211143	0.0450429	0.0703208	0.0351187	0.0246877	0.0307238	0.0370465	0.0517716	0.0373166	0.0320584	0.0452564	0.0521334	0.0364643	0.0314485	0.0363549	0.0546343	0.0359855	0.147261	0.164723	0.0803694	0.0657347	0.102327	0.23755	0.132675	0.10446	0.132309	0.126698	0.149318	0.0824739	0.0628226	0.0587782	0.0766303	0.128542	0.0872857	0.0897476	0.107143
0.069063	0.0425171	0.0582371	0.0698264	0.0739709	0.0303967	0.0240123	0.0802506	0.0383068	0.0623864	0.0415292	0.0220723	0.0354836	0.0299449	0.0255324	0.0483227	0.106217	0.0325601	0.0240326	0.0335693	0.0422778	0.0581522	0.051553	0.0370932	0.0502978	0.0625715	0.0496825	0.0605754	0.0473365	0.0659173	0.060575	0.148893	0.162137	0.0855408	0.200486	0.0968023	0.159142	0.0984377	0.207873	0.234776	0.234749	0.50194	0.172862	0.16517	0.101172	0.488206	0.162142	0.13363	0.11433	0.13922
0.0302943	0.0284584	0.0313086	0.0358455	0.0455934	0.0201392	0.0193621	0.0503696	0.0289005	0.0409388	0.0324241	0.0205058	0.0239796	0.0238521	0.0188327	0.0347739	0.0558625	0.027498	0.0207942	0.0315678	0.0340946	0.0398825	0.0409208	0.0293772	0.0359232	0.0393964	0.0310532	0.0562628	0.0333536	0.0503624	0.0341734	0.103634	0.082673	0.0601718	0.0676676	0.0610166	0.113704	0.063963	0.0747973	0.116964	0.0915835	0.16302	0.0511144	0.036614	0.0279249	0.0855894	0.0561321	0.0414659	0.0548433	0.0630124
0.0814019	0.0477806	0.0894481	0.0793869	0.0886243	0.0403621	0.0301143	0.0849682	0.0480474	0.0675575	0.0463435	0.0207067	0.0434327	0.0402722	0.0217778	0.0597932	0.138653	0.0323479	0.0242409	0.0414233	0.0403721	0.0710098	0.0641543	0.0375763	0.0565004	0.0868896	0.0553537	0.0701881	0.0489892	0.0726654	0.070591	0.118115	0.166811	0.0551906	0.0621397	0.0780947	0.188292	0.116178	0.0904601	0.0922223	0.124023	0.138796	0.0792012	0.0884604	0.070965	0.116156	0.105381	0.0896171	0.0872826	0.0990301
0.0356022	0.0267705	0.0307414	0.0334895	0.034914	0.0153542	0.0226162	0.0243453	0.0203513	0.0274833	0.019298	0.0150557	0.0209862	0.0235632	0.0172818	0.0216296	0.0342134	0.0166965	0.019139	0.01673	0.0171664	0.0227884	0.0255796	0.0233541	0.026049	0.0276403	0.0263363	0.0160372	0.0274604	0.0303041	0.023812	0.156835	0.120353	0.0529279	0.0538625	0.0515386	0.0957763	0.072754	0.0637409	0.0579131	0.0554907	0.0483525	0.0377034	0.0370247	0.0253464	0.0362204	0.0369897	0.0355508	0.0439935	0.0435266
0.0339788	0.0259409	0.0365126	0.0425469	0.0474097	0.0221826	0.0248996	0.0311341	0.0264555	0.0393549	0.0288248	0.0162263	0.0357076	0.0224568	0.0202693	0.0406024	0.0458715	0.0291229	0.0213655	0.0227929	0.0431495	0.0478826	0.0290302	0.0294262	0.0413223	0.0363511	0.0331173	0.0253089	0.0348155	0.0531817	0.0248613	0.201518	0.154925	0.105705	0.190761	0.10738	0.132349	0.111231	0.164725	0.174719	0.129998	0.184461	0.0895246	0.0607499	0.0463938	0.0878763	0.0732396	0.0658967	0.0880427	0.0960217
0.0224932	0.0174948	0.0224677	0.0277417	0.0257288	0.0156601	0.0154684	0.0191286	0.0186091	0.0237993	0.021417	0.0156314	0.0265997	0.0172409	0.0184635	0.0293282	0.0165609	0.0312014	0.0166061	0.0226243	0.0343931	0.0301453	0.0150867	0.0172571	0.0242073	0.0264989	0.0201108	0.0216247	0.0191047	0.0241415	0.0194964	0.0651559	0.0637392	0.0491817	0.0472734	0.05002	0.0585216	0.0649493	0.050876	0.0470702	0.0426513	0.0528718	0.0343088	0.0219394	0.0259479	0.0302969	0.0418184	0.0300353	0.0327995	0.0403162
0.0375061	0.0311724	0.0411508	0.0458556	0.0479032	0.020496	0.0217623	0.0319396	0.0310717	0.0452491	0.0328342	0.0148975	0.0363614	0.020422	0.0150514	0.0374339	0.0488023	0.0301963	0.0191079	0.0239967	0.0411079	0.0508658	0.032166	0.0294279	0.0378632	0.045774	0.0318692	0.027882	0.0339769	0.0553312	0.0262427	0.266402	0.200512	0.174943	0.147146	0.15427	0.171423	0.159753	0.161162	0.135633	0.160325	0.151366	0.0600188	0.0500318	0.0370638	0.0842265	0.0478	0.0618965	0.0981736	0.0900492
0.0263572	0.0201259	0.0295621	0.0410474	0.0387931	0.0214224	0.0168462	0.0253874	0.0190137	0.0331338	0.0264437	0.017676	0.0266845	0.0190266	0.0210191	0.0344309	0.0308832	0.0307119	0.0162481	0.0187755	0.0457121	0.0437175	0.023386	0.02533	0.0362997	0.0340471	0.029324	0.025262	0.0312869	0.0469044	0.0241512	0.117759	0.0906626	0.0736277	0.0912588	0.0750119	0.0966818	0.0797636	0.0902298	0.124531	0.0852443	0.119043	0.0505348	0.0261579	0.0263629	0.0539275	0.0573104	0.0365943	0.0544274	0.0865442
0.0257094	0.0147682	0.0253042	0.0318103	0.0361714	0.0204191	0.017148	0.0211889	0.0214734	0.0342741	0.0229792	0.0177685	0.0196887	0.0208272	0.0205741	0.0276971	0.0329854	0.0216412	0.0175274	0.0127724	0.0313137	0.0324825	0.0200607	0.0238695	0.0294182	0.0315077	0.0247321	0.0147036	0.0255233	0.0438472	0.0201985	0.121741	0.0989641	0.0814372	0.169951	0.090116	0.0848297	0.0762576	0.148386	0.177144	0.120523	0.148556	0.0694704	0.0396308	0.03823	0.069357	0.0707158	0.0506279	0.0815125	0.10212
0.0226781	0.0151072	0.0306659	0.0368902	0.0375432	0.0258701	0.0192974	0.0222635	0.0231106	0.0325417	0.0285991	0.0192656	0.0212958	0.0233478	0.0226448	0.0289917	0.0333156	0.0278487	0.0220801	0.0169033	0.040998	0.0333701	0.0210453	0.0286229	0.0344918	0.031244	0.0263697	0.020158	0.0302372	0.0461542	0.0182018	0.119702	0.092136	0.069995	0.0872179	0.0750902	0.0938083	0.078795	0.105528	0.146655	0.0923987	0.131577	0.0790022	0.0343632	0.0346146	0.0486403	0.0928049	0.0493295	0.0680605	0.107279
0.0428701	0.0245535	0.0524656	0.0638713	0.0721751	0.0316135	0.0258307	0.0467231	0.0392425	0.0699363	0.0479368	0.024426	0.037154	0.0336476	0.0263627	0.0569593	0.0754072	0.036173	0.027921	0.0288535	0.0575883	0.0677838	0.0372934	0.0414176	0.0573725	0.0675156	0.0492479	0.0303606	0.0498659	0.0785122	0.0368603	0.302689	0.234952	0.138415	0.231807	0.167729	0.217755	0.166004	0.307208	0.436237	0.288784	0.395055	0.202192	0.113087	0.103733	0.179587	0.185769	0.153385	0.165278	0.242228
0.0324153	0.020151	0.0240516	0.0316694	0.0317392	0.0209199	0.0190692	0.0318028	0.021162	0.0290362	0.0253403	0.0208473	0.0218014	0.0199717	0.0185794	0.0303205	0.0403989	0.0291363	0.0177276	0.0285418	0.0381214	0.0338515	0.0212544	0.0233717	0.0311523	0.028543	0.0259734	0.0362206	0.0241898	0.0322646	0.0308457	0.0939107	0.090239	0.0503479	0.126088	0.0520171	0.105129	0.0652157	0.104715	0.163753	0.106221	0.230958	0.108171	0.0471619	0.0493983	0.147308	0.129498	0.0594008	0.0643771	0.10142
0.0171912	0.0112373	0.0277965	0.0268868	0.0324558	0.0203214	0.0144814	0.0256497	0.0225178	0.0252694	0.0230745	0.01588	0.0178813	0.0213698	0.0173621	0.0245879	0.031109	0.0281088	0.0231638	0.0164598	0.03609	0.0285473	0.0246802	0.0285909	0.0355375	0.0293941	0.0279356	0.0324615	0.0283225	0.0473063	0.0242162	0.0398378	0.0409794	0.0226873	0.020873	0.0245107	0.0417204	0.0259996	0.0320202	0.0549363	0.0329344	0.0527249	0.0267167	0.0178376	0.0151679	0.0317153	0.0305597	0.0204406	0.0268161	0.0388637
0.0303039	0.0219536	0.03275	0.0424856	0.0480222	0.0225255	0.0192287	0.0304525	0.0261639	0.0426204	0.034286	0.0149399	0.0293212	0.0210581	0.0159672	0.0450032	0.0410089	0.0384503	0.0173328	0.0243694	0.0531998	0.0577053	0.0283882	0.0264589	0.0433651	0.047318	0.0284411	0.0252048	0.0349646	0.0567563	0.024141	0.0964258	0.0920901	0.0730337	0.0533379	0.0767656	0.0718482	0.0743278	0.0759526	0.090388	0.0723406	0.0868427	0.0350239	0.026231	0.0225327	0.0404793	0.0436164	0.0389472	0.0728677	0.0774626
0.0636038	0.0414538	0.0572848	0.0688346	0.0814893	0.028312	0.0297922	0.0436726	0.0404303	0.0752288	0.05707	0.0225275	0.0463191	0.0294075	0.0264116	0.0699887	0.0838963	0.0400375	0.0262056	0.0414488	0.0592782	0.0858848	0.0451153	0.0395715	0.0672046	0.0849868	0.0543983	0.0402824	0.0537154	0.076295	0.0402834	0.193152	0.203358	0.135407	0.151765	0.18192	0.163949	0.158972	0.196362	0.216345	0.242531	0.219914	0.120103	0.0857593	0.0778572	0.145983	0.108794	0.133503	0.285967	0.194134
0.0573122	0.051492	0.0614667	0.0813161	0.0813024	0.026858	0.0330284	0.0525198	0.0368	0.0765388	0.0526606	0.0172815	0.0536621	0.0262403	0.0218192	0.0704582	0.0749448	0.0440275	0.0217968	0.0437288	0.0638576	0.0722619	0.0637397	0.0417224	0.0679634	0.0865783	0.0572768	0.0609354	0.0624799	0.104681	0.056995	0.110345	0.119212	0.0831112	0.0863253	0.104644	0.114399	0.104956	0.101078	0.0954632	0.130553	0.117306	0.0608319	0.0571225	0.0462437	0.103283	0.0655506	0.0789854	0.199493	0.107817
0.0462847	0.023219	0.0483066	0.0595824	0.0696042	0.0296576	0.0203101	0.037746	0.0370301	0.0597746	0.0480872	0.0198121	0.0339464	0.0300896	0.0215491	0.0562969	0.0617567	0.0442951	0.0256824	0.0285418	0.0688453	0.0701069	0.0374637	0.0356978	0.0609277	0.0625804	0.044623	0.0324646	0.0443646	0.0678291	0.0337852	0.121458	0.12892	0.0868197	0.104849	0.116535	0.117719	0.105173	0.138102	0.180224	0.147517	0.183294	0.113685	0.0621359	0.0566562	0.107558	0.155457	0.102251	0.13347	0.175617
0.0492107	0.0582071	0.0557116	0.100017	0.0752142	0.0218479	0.0417582	0.0521867	0.0359512	0.0840352	0.0561097	0.0175005	0.0677256	0.026396	0.0233491	0.082094	0.0690421	0.0586609	0.0276872	0.0487583	0.0909193	0.101888	0.0810613	0.0488006	0.0837764	0.126917	0.0723483	0.111781	0.0811875	0.151321	0.0815613	0.0889887	0.0931765	0.0690971	0.0604986	0.0775874	0.0870025	0.0786424	0.0742699	0.0736625	0.0820395	0.0761087	0.0433377	0.0414751	0.0345063	0.060709	0.0415687	0.0513083	0.0901284	0.0761055
0.0550842	0.0492355	0.0653052	0.0994099	0.0820242	0.0264153	0.0359501	0.058464	0.0400382	0.0892104	0.0666277	0.0169786	0.0666697	0.0339142	0.0286299	0.101002	0.0861879	0.05566	0.028601	0.0652643	0.0781	0.11111	0.101557	0.0637385	0.0979242	0.139232	0.0830194	0.142606	0.094507	0.171333	0.106996	0.0655323	0.0793172	0.0483738	0.0410357	0.0551301	0.0761865	0.0628247	0.0628886	0.0481184	0.0658971	0.0654754	0.0373906	0.0338621	0.0303164	0.0586793	0.0340389	0.0424679	0.0721476	0.0589766
0.0376777	0.021392	0.0373586	0.0446774	0.0520606	0.0233867	0.0198113	0.0400725	0.0308467	0.0461352	0.0371093	0.0223226	0.0243895	0.0258968	0.0205117	0.0415147	0.0581127	0.0312358	0.0218468	0.0272	0.0451035	0.0490293	0.0354314	0.0347071	0.0538552	0.0501645	0.0393269	0.0332698	0.0440518	0.0644392	0.0376301	0.0866026	0.0968173	0.0557354	0.068232	0.0814108	0.104269	0.0797746	0.0949958	0.161223	0.127387	0.159908	0.116311	0.0663473	0.0688722	0.115651	0.187102	0.108598	0.119285	0.190823
0.00777666	0.0090766	0.0117252	0.0106913	0.0109331	0.00877004	0.00811153	0.0100438	0.00843496	0.0129709	0.0119593	0.00686719	0.0104199	0.00791101	0.00815457	0.0113444	0.0125297	0.0094145	0.00742094	0.0105474	0.0115121	0.0108607	0.0122717	0.00912903	0.0109844	0.0111314	0.0129644	0.0106873	0.0123575	0.0119642	0.0159101	0.011259	0.0120104	0.0126119	0.0125645	0.0113865	0.0107278	0.0118898	0.0126768	0.0122359	0.0123391	0.0128272	0.0126515	0.0122927	0.0110808	0.0126383	0.0141207	0.0122337	0.0121195	0.0127787
0.021633	0.025935	0.0148636	0.0138844	0.013574	0.011337	0.0137778	0.0127281	0.0131714	0.0122023	0.0111754	0.0120551	0.0137117	0.0100173	0.0151634	0.0141827	0.0150413	0.0167862	0.0119523	0.018634	0.0129698	0.015755	0.0129414	0.0113796	0.0160223	0.014114	0.0105055	0.0167715	0.0131151	0.0123771	0.0148858	0.0225741	0.0202965	0.018796	0.0178262	0.0156541	0.0159411	0.022076	0.0150388	0.0155124	0.0151727	0.0167039	0.0152464	0.0166786	0.0138204	0.0163775	0.0166404	0.0141485	0.014511	0.0105153
0.0160737	0.0166878	0.0156091	0.0139313	0.0145907	0.0106438	0.0143556	0.0132455	0.00994576	0.0147734	0.012968	0.00998247	0.0133118	0.0125211	0.0091016	0.0164451	0.0190171	0.0138289	0.0104609	0.0166044	0.0136014	0.0155742	0.0154888	0.0171117	0.0177844	0.0169144	0.0172355	0.0181775	0.0186292	0.0176926	0.0181161	0.0182991	0.0176812	0.0174571	0.0137253	0.0163863	0.0191758	0.0170414	0.0120823	0.0167216	0.0142885	0.0142093	0.0179866	0.022258	0.0147399	0.0150765	0.0154202	0.0209405	0.0197554	0.0164035
0.0239749	0.0361746	0.0219126	0.0177764	0.0200439	0.00897467	0.0256032	0.0157114	0.0142886	0.0187216	0.0177685	0.0101969	0.0121735	0.012277	0.0115372	0.0207886	0.0222191	0.0123029	0.011246	0.0316819	0.0148004	0.0199526	0.0131396	0.0154431	0.0177166	0.0228085	0.0143452	0.0114369	0.0170381	0.021503	0.0196972	0.0180159	0.0234595	0.0151138	0.0166111	0.0195798	0.0212247	0.0228443	0.018459	0.0217656	0.0211327	0.0231717	0.0226462	0.0217484	0.0203832	0.0253031	0.0235677	0.0230158	0.0208813	0.01959
0.0151623	0.0147364	0.0165567	0.012695	0.0159617	0.0110738	0.0103418	0.0137048	0.0136473	0.0156406	0.0183161	0.0188836	0.0103134	0.0123562	0.0145937	0.0163508	0.0161764	0.015102	0.0127454	0.0163556	0.0155987	0.0144126	0.01393	0.01384	0.0181529	0.0160633	0.0156026	0.0163963	0.0183104	0.0170966	0.0211774	0.0163657	0.0190874	0.0133796	0.0141556	0.0154218	0.0120895	0.0154924	0.0161582	0.0158101	0.0130889	0.0138825	0.0163204	0.016144	0.0126049	0.0154633	0.017071	0.0138644	0.0164588	0.0136172
0.0604311	0.0445839	0.0521162	0.0436366	0.0467243	0.0219077	0.0224895	0.0479715	0.0242591	0.0343681	0.0301605	0.0148301	0.0248437	0.0309165	0.0143042	0.0299603	0.0539646	0.0214614	0.0183482	0.029339	0.0206282	0.033421	0.0342985	0.0251504	0.0289484	0.035168	0.0321133	0.0288026	0.0245904	0.0301426	0.0335822	0.0509396	0.0580926	0.0245245	0.0402024	0.0377406	0.0546704	0.0445605	0.0392748	0.0456461	0.0418904	0.0533926	0.0437998	0.0365999	0.0310659	0.0514556	0.0424811	0.0420148	0.0421596	0.04522
0.0297216	0.0318484	0.0252443	0.0253661	0.0234854	0.0165158	0.0264512	0.0217704	0.0155093	0.0230485	0.0195952	0.0119659	0.0171541	0.0184642	0.014444	0.023177	0.0252801	0.0140311	0.0127412	0.0231845	0.0169966	0.0222252	0.0171013	0.0149691	0.0195768	0.0225497	0.0196286	0.0145814	0.019028	0.0211124	0.0184755	0.0260544	0.0295206	0.0183065	0.0321896	0.0222605	0.0272611	0.0248927	0.0297457	0.0301126	0.0250614	0.0296631	0.0288073	0.0231486	0.0226413	0.029834	0.0245367	0.0297818	0.0241859	0.0273835
0.0493318	0.0437284	0.0354095	0.0359199	0.0313105	0.0169592	0.031582	0.0315998	0.0169786	0.0234515	0.0214359	0.00974317	0.0269322	0.0196381	0.0124796	0.0276862	0.0275004	0.0192466	0.010916	0.0275403	0.0193421	0.0301071	0.0249437	0.0164196	0.0198911	0.0274361	0.0214183	0.0205583	0.0175046	0.0220467	0.0212875	0.0412794	0.040905	0.0268288	0.0427784	0.0338516	0.0342312	0.0327666	0.033096	0.034724	0.031323	0.0297233	0.0309131	0.0277775	0.0249311	0.0311049	0.0266949	0.0282812	0.0286483	0.0272372
0.0101577	0.00867237	0.015493	0.0116992	0.011943	0.0104461	0.00860096	0.0118081	0.01035	0.0122967	0.0095892	0.008582	0.00974139	0.0146102	0.00933519	0.0117454	0.0132809	0.0119712	0.00948656	0.00859985	0.011115	0.0104935	0.0117304	0.0105975	0.0109213	0.010248	0.011966	0.0107803	0.0101098	0.0112723	0.0159425	0.0127611	0.0151591	0.0104588	0.00935803	0.0120233	0.0140338	0.0147592	0.011032	0.0136257	0.0145719	0.0155888	0.0122382	0.0108496	0.0127759	0.0107588	0.0122045	0.013527	0.014952	0.013331
0.0612177	0.0472493	0.0390856	0.02717	0.0220751	0.0194448	0.0179428	0.0349227	0.0196303	0.0201417	0.0159925	0.00884048	0.0177271	0.017952	0.0108236	0.0235585	0.0282385	0.0124837	0.00923769	0.0242446	0.0141268	0.0209961	0.0229602	0.0146063	0.0146668	0.0206166	0.0182372	0.0259009	0.0152551	0.0170195	0.022956	0.0260419	0.0297468	0.01304	0.0197643	0.0172498	0.0246226	0.024618	0.0189822	0.0235283	0.0193089	0.0234222	0.0228695	0.0252452	0.0222782	0.0256649	0.0239499	0.0240249	0.020283	0.0203157
0.0662139	0.0502178	0.06271	0.0486329	0.056768	0.0268815	0.0324091	0.0518452	0.0358381	0.0405771	0.0351169	0.0193661	0.0288047	0.0382419	0.0216149	0.0410699	0.0568541	0.0298946	0.0187826	0.0424093	0.0303714	0.0422751	0.0326547	0.0280393	0.0361488	0.045929	0.0371322	0.0267904	0.0286604	0.0334081	0.0412386	0.0591875	0.0776564	0.0325447	0.0425854	0.0456546	0.0622403	0.0530108	0.0490104	0.0446317	0.0552021	0.0511345	0.0527025	0.0588485	0.0446337	0.0611981	0.0605655	0.0555783	0.0562853	0.0450297
0.0331763	0.0392516	0.0280803	0.0336497	0.0283551	0.0135556	0.0312364	0.0225567	0.0146392	0.0290561	0.0226913	0.012873	0.0249872	0.0194036	0.0148346	0.0322637	0.029793	0.0192971	0.0153949	0.0355579	0.0214058	0.0300067	0.0192476	0.0183486	0.0268275	0.0323367	0.0214296	0.0160875	0.0201521	0.0249591	0.0216386	0.0471284	0.0434259	0.0281986	0.0362364	0.0315528	0.0356939	0.032319	0.0376293	0.0267601	0.0369388	0.0300877	0.0288804	0.0275142	0.0241849	0.0332135	0.0280857	0.0300637	0.0397413	0.0288609
0.0339164	0.0625652	0.0174015	0.0204446	0.0194976	0.0124988	0.0341555	0.0122093	0.0154281	0.0170853	0.0161704	0.00994927	0.0198741	0.0112105	0.0103638	0.025249	0.0160696	0.0129854	0.00850351	0.0410147	0.0148413	0.0249031	0.0139856	0.0099339	0.014364	0.0259684	0.0126771	0.0161664	0.0104652	0.0161809	0.0151774	0.0188959	0.0210377	0.0167671	0.0188948	0.0225156	0.0210812	0.0179576	0.0182441	0.0169487	0.0211417	0.0173352	0.018063	0.0192954	0.0162435	0.0244423	0.019743	0.0198828	0.0190162	0.0166112
0.0812464	0.111019	0.0521875	0.0548148	0.0535576	0.0313618	0.0404168	0.0725386	0.0413129	0.0351204	0.0331216	0.0229375	0.0332163	0.0354139	0.0298696	0.0427945	0.0494336	0.0326442	0.0229899	0.0625777	0.0262098	0.0425054	0.0717521	0.0327723	0.0369959	0.0535015	0.0599809	0.237126	0.0411936	0.0424569	0.223792	0.0235576	0.0351723	0.0209379	0.0234543	0.0262346	0.0300473	0.0284414	0.02699	0.0256481	0.0285869	0.0284022	0.0259493	0.0293083	0.0253753	0.040358	0.0299195	0.0293683	0.0284691	0.0304189
0.0146825	0.0190988	0.0174631	0.0186083	0.0228445	0.0170345	0.0133639	0.0262427	0.0164099	0.0220592	0.0235697	0.0164255	0.015141	0.0133366	0.0132392	0.0217738	0.0236371	0.0220132	0.014452	0.0226167	0.0223899	0.023032	0.0242258	0.0222937	0.0264057	0.0238495	0.0232644	0.0373061	0.022704	0.0267785	0.024915	0.0352576	0.0320478	0.0193051	0.0269811	0.0193823	0.0323172	0.0219402	0.0213614	0.0368788	0.0215661	0.0472306	0.0258704	0.0210518	0.0157215	0.0338311	0.0262522	0.0191839	0.0164607	0.0230447
0.0144538	0.0189616	0.0187431	0.0236495	0.0244271	0.0183324	0.0120834	0.0195851	0.0166748	0.0202471	0.0206206	0.0208601	0.0158391	0.0154198	0.0157966	0.0233409	0.0243412	0.0175313	0.0160968	0.0244135	0.0171823	0.0218068	0.0224394	0.0229803	0.0266879	0.0249555	0.0246584	0.0245176	0.0273969	0.0221962	0.0234002	0.0174637	0.0205767	0.0152279	0.0167596	0.0178249	0.0181703	0.0178157	0.0165434	0.018514	0.0212507	0.0222199	0.0191948	0.0179752	0.0136745	0.0221168	0.0204518	0.0149944	0.0177295	0.0161813
0.0286634	0.0289293	0.0264487	0.0204699	0.0256651	0.019147	0.0129295	0.0311476	0.0155358	0.02009	0.0174771	0.0288354	0.0156994	0.0208372	0.0188601	0.0213371	0.0241759	0.015944	0.0205593	0.0255894	0.0186308	0.0224724	0.0270328	0.0172596	0.0257563	0.0252301	0.0275851	0.0542202	0.0272759	0.0207707	0.070036	0.0238997	0.0275514	0.0189816	0.0197149	0.0219316	0.0253193	0.0217831	0.023955	0.0247308	0.0261087	0.0250431	0.0198277	0.0196989	0.0192162	0.0281471	0.0247474	0.0230898	0.0228804	0.0261411
0.0252477	0.0203749	0.0211343	0.0241812	0.0257714	0.0179112	0.0146519	0.0324308	0.013538	0.0190328	0.0169236	0.0222092	0.017483	0.0186182	0.0151494	0.0215529	0.0277168	0.0151618	0.016682	0.0188432	0.0160664	0.0223677	0.0342545	0.0172661	0.0221334	0.0276562	0.0263157	0.0580059	0.0257713	0.0238889	0.0540159	0.0199451	0.0293481	0.0158008	0.0181289	0.0170418	0.0214366	0.0201504	0.0229194	0.023096	0.0241588	0.0245991	0.0185547	0.0193339	0.0151781	0.0308956	0.0184244	0.0199645	0.0235526	0.0196432
0.0628776	0.0399164	0.0516983	0.0558275	0.0571444	0.0233357	0.0228655	0.106532	0.0355628	0.0459591	0.0353623	0.0189782	0.0329725	0.0213763	0.020524	0.0388624	0.0668749	0.032642	0.0183595	0.0314121	0.0326278	0.0472506	0.0567904	0.0259992	0.0385484	0.0503963	0.0530193	0.120842	0.0356857	0.0425821	0.118665	0.0557652	0.0723733	0.0358722	0.0653816	0.0506325	0.0752959	0.0531552	0.0547995	0.0582414	0.0725411	0.104774	0.0655131	0.0609091	0.0500964	0.181655	0.0719074	0.0572826	0.0544336	0.0658796
0.0410855	0.0504933	0.0339146	0.0199846	0.0249155	0.0228451	0.0142748	0.0373233	0.0202006	0.018191	0.0156362	0.0262631	0.0182863	0.0205905	0.0205706	0.0273463	0.0283213	0.0171125	0.0171617	0.0314264	0.0181814	0.0244611	0.0296194	0.0139654	0.019182	0.0248467	0.0183089	0.0743346	0.0209286	0.0232727	0.0691318	0.0200587	0.0287907	0.0163544	0.0219286	0.0217702	0.0230713	0.0233547	0.0211212	0.0222946	0.0273424	0.0243366	0.0225945	0.0200728	0.0180538	0.0337406	0.0238065	0.0234164	0.0203342	0.0220763
0.013776	0.0128477	0.0172846	0.0119993	0.0148613	0.0152089	0.00755584	0.0170176	0.0142924	0.0101501	0.0120055	0.0130124	0.00938664	0.0110177	0.0149595	0.0123585	0.0119809	0.0164758	0.0129425	0.0120261	0.0150245	0.0153622	0.0138279	0.0146162	0.0139878	0.0128897	0.0128609	0.0140227	0.0147175	0.0148073	0.0198976	0.015363	0.0140385	0.0102225	0.0130332	0.0126743	0.0158203	0.0109462	0.0135644	0.0119802	0.0133881	0.0138875	0.0115978	0.00803372	0.00803969	0.0117885	0.0107673	0.0107018	0.0119564	0.0113076
0.0199765	0.0143821	0.0184493	0.0169924	0.0170485	0.00917456	0.0114389	0.0158536	0.0144177	0.016252	0.0165254	0.0166911	0.0156432	0.0117815	0.0116885	0.0222198	0.0128151	0.0128782	0.0102279	0.0175309	0.0174146	0.0227008	0.0143074	0.0107914	0.0200341	0.021946	0.0132336	0.0160803	0.018991	0.0229397	0.0298261	0.0191045	0.0215945	0.0174783	0.0136577	0.0188328	0.0191547	0.0195464	0.0204598	0.0164151	0.0223177	0.0168162	0.0179107	0.0183126	0.0146878	0.0161134	0.0238456	0.0163987	0.0185655	0.0162896
0.0449002	0.0350112	0.0323492	0.0275295	0.0269855	0.0173904	0.0151457	0.0285437	0.0241043	0.0177273	0.0168725	0.0203933	0.0214788	0.020832	0.0170915	0.0262673	0.021925	0.0224836	0.0176913	0.0236938	0.0177699	0.0236012	0.0248685	0.0138614	0.0190795	0.0225828	0.0210689	0.0528796	0.0178922	0.0192896	0.0390425	0.04589	0.0542344	0.0266021	0.0398404	0.0298827	0.0548342	0.0416171	0.0370351	0.0399691	0.0378352	0.0551835	0.0420111	0.0351101	0.0316835	0.0485957	0.0533619	0.0355343	0.0350507	0.0310663
0.0168079	0.0140958	0.0185126	0.0179933	0.0180131	0.0118492	0.0102977	0.0231343	0.0128256	0.0149249	0.0130827	0.017073	0.0149266	0.0123129	0.0182094	0.0193156	0.0192067	0.0202432	0.0144789	0.0204448	0.0177741	0.0205686	0.0177414	0.0166651	0.0185952	0.0188554	0.0166452	0.0289254	0.0172127	0.0181574	0.0354009	0.0251636	0.0264418	0.0170286	0.017141	0.0200697	0.032035	0.0181908	0.0203936	0.0279291	0.0191945	0.0305275	0.0195429	0.0158051	0.018243	0.0237768	0.0222357	0.0209038	0.0191696	0.0222142
0.0182367	0.0180797	0.0192649	0.0131779	0.0168477	0.0156893	0.0136474	0.0138199	0.0168636	0.0116283	0.014757	0.0176173	0.0125483	0.0106077	0.0130436	0.0152517	0.0145638	0.0144743	0.013023	0.021814	0.0185317	0.0168616	0.0112288	0.0140123	0.0209114	0.023152	0.0100307	0.0245571	0.011291	0.0180535	0.0278365	0.0173628	0.0205278	0.0142143	0.012528	0.0166142	0.0195075	0.016583	0.0208365	0.018251	0.0174326	0.019049	0.0161143	0.0170711	0.0153722	0.0145745	0.0156023	0.0150613	0.0174981	0.0140423
0.0375507	0.028461	0.0248191	0.0290844	0.0291379	0.0141118	0.0162055	0.0347934	0.0209824	0.019772	0.0219416	0.0186953	0.0223462	0.0183678	0.0198926	0.025194	0.0274247	0.02731	0.0161611	0.0240433	0.0270928	0.0296909	0.0263306	0.021987	0.0287209	0.0245732	0.0257059	0.0673472	0.0243576	0.0311978	0.049795	0.055769	0.0500726	0.0285476	0.0404158	0.0268762	0.0503476	0.0346234	0.0374069	0.0496283	0.0326747	0.0780734	0.0337753	0.0218038	0.0204304	0.0671911	0.0382809	0.0264895	0.0266403	0.0321457
0.0702975	0.0481775	0.0522778	0.0510779	0.0517016	0.0235816	0.0239388	0.0439598	0.0363667	0.0354498	0.028968	0.0247137	0.0316459	0.0290606	0.0255121	0.0443351	0.0395612	0.0390896	0.0240499	0.0387981	0.0329834	0.0437145	0.0402068	0.0231273	0.0361823	0.0405565	0.0372439	0.0672656	0.0318417	0.0392969	0.0590247	0.0586708	0.082878	0.0412519	0.0487069	0.047051	0.0845828	0.0726457	0.0565701	0.052958	0.0559552	0.0654172	0.0601178	0.0529239	0.050625	0.0690062	0.0855952	0.0590294	0.0516385	0.0530773
0.0599285	0.045823	0.0419549	0.0520502	0.0410854	0.0164453	0.0201829	0.0506418	0.0250003	0.0306947	0.0280171	0.0205851	0.0305691	0.0198106	0.0184837	0.0340258	0.0366202	0.0322125	0.0195542	0.0250148	0.0317942	0.0368573	0.0351263	0.0218818	0.0345999	0.0376207	0.0354107	0.084671	0.0252983	0.037573	0.0571128	0.0487398	0.0680468	0.0326801	0.0438214	0.0338856	0.0704329	0.0519162	0.0462735	0.0428786	0.04992	0.0664506	0.0498184	0.0373576	0.0396435	0.0658132	0.0667352	0.0437169	0.0414121	0.049484
0.02077	0.0265027	0.0234025	0.0212493	0.0224562	0.0117462	0.0131083	0.0213689	0.0158796	0.0175618	0.0181354	0.0133585	0.0175104	0.0133874	0.0172835	0.01719	0.0239742	0.0224801	0.0123413	0.0224848	0.020641	0.0191323	0.0217274	0.0171298	0.0254798	0.022103	0.0190301	0.0479629	0.0199685	0.026244	0.0444128	0.0343464	0.0326878	0.0254859	0.0237054	0.0234518	0.0305256	0.0272196	0.0269752	0.033954	0.0265458	0.0365363	0.0222696	0.0185614	0.0141375	0.0314126	0.0267194	0.0190895	0.0209205	0.0207613
0.0145292	0.0141737	0.0208802	0.0216964	0.0171251	0.0122206	0.0135164	0.0163801	0.0119889	0.0149558	0.0125144	0.0098807	0.0174912	0.0142096	0.0142142	0.0179142	0.0147109	0.0168886	0.0101756	0.0133962	0.0194138	0.017864	0.0122007	0.0101089	0.0169508	0.0164909	0.0139239	0.0116382	0.01353	0.0159744	0.0138178	0.0333369	0.0346717	0.0318338	0.0306016	0.0304879	0.0296884	0.035933	0.0285634	0.0275867	0.0225839	0.0205942	0.0199568	0.0161533	0.0165688	0.0161677	0.0210304	0.0197	0.0252058	0.0256141
0.0396816	0.0418817	0.0609373	0.0802182	0.0865587	0.0445888	0.0250826	0.0520335	0.0603903	0.0794338	0.0931749	0.0259352	0.0648837	0.0425445	0.0522128	0.0942152	0.0637359	0.0844871	0.0478458	0.045864	0.105452	0.0900287	0.127776	0.112377	0.170412	0.150232	0.136015	0.176767	0.193094	0.321051	0.233792	0.0266334	0.0358574	0.0186879	0.0203763	0.0199828	0.0310063	0.0268884	0.0261018	0.0279756	0.0244715	0.0336052	0.0279436	0.0260504	0.0239966	0.0318626	0.0291869	0.0321276	0.0250677	0.0323355
0.0481232	0.0619709	0.0469797	0.0551895	0.0462099	0.031672	0.0338292	0.0495978	0.0420439	0.0448542	0.043322	0.0203773	0.0359019	0.0327298	0.0389151	0.0543472	0.0537936	0.0402203	0.0324203	0.0542417	0.0387055	0.0536784	0.0784837	0.0581049	0.0644084	0.0789238	0.0648329	0.164162	0.0722112	0.0918224	0.151144	0.0330489	0.0421843	0.0227512	0.0265447	0.0266242	0.0359949	0.0318155	0.0349295	0.0288109	0.0313066	0.0315751	0.0260802	0.0235158	0.0222316	0.0294735	0.0268205	0.0324943	0.0256956	0.030483
0.0374402	0.0381111	0.0249264	0.0276989	0.0275195	0.0175778	0.0242925	0.0209028	0.0176107	0.024396	0.0222641	0.0155115	0.0257872	0.0168032	0.0139777	0.0316395	0.0213896	0.0280435	0.0138478	0.0309629	0.0256474	0.032697	0.0220823	0.0139197	0.0237149	0.0261862	0.0189481	0.0315277	0.0205009	0.0228361	0.0285919	0.0447108	0.04768	0.0345888	0.0388185	0.0420115	0.0400966	0.0425251	0.0419137	0.0362384	0.0366785	0.0430373	0.032694	0.0294572	0.0265411	0.0420478	0.0307732	0.0333672	0.0405453	0.0284131
0.0198571	0.0150334	0.0237762	0.0201558	0.0235427	0.0147498	0.0129084	0.0215185	0.020337	0.0167411	0.0172513	0.0188005	0.00927049	0.0186498	0.0143699	0.0164482	0.0196156	0.0199569	0.021518	0.0151933	0.0198857	0.0162436	0.0152964	0.0157352	0.01739	0.0270862	0.0164209	0.0171215	0.0167658	0.0384146	0.0184795	0.0224054	0.0305796	0.019027	0.0160293	0.0174398	0.0236215	0.0215811	0.0170845	0.0190239	0.0207847	0.0232808	0.0202355	0.0190748	0.0172529	0.0261081	0.0236534	0.0219519	0.0184887	0.0177001
0.0219919	0.0181658	0.0236233	0.0233878	0.0254054	0.0223766	0.0114188	0.0238728	0.018141	0.0207015	0.0239683	0.0180949	0.0182345	0.0193723	0.0150927	0.0201351	0.0254827	0.0284054	0.0154999	0.0184244	0.0240603	0.0216541	0.0255792	0.0211571	0.0268368	0.0225565	0.023666	0.023147	0.0293272	0.0278459	0.0235739	0.0255584	0.0317524	0.0216941	0.0171359	0.0214894	0.0252856	0.0239787	0.0217687	0.0196404	0.0247874	0.0226124	0.018195	0.0184954	0.0143959	0.0184184	0.0268454	0.0178466	0.0196727	0.0200707
0.0420273	0.0337361	0.0453806	0.0294693	0.0335938	0.0176199	0.020275	0.0306296	0.0229703	0.029627	0.0255886	0.018174	0.021115	0.026152	0.0161507	0.0274823	0.0330128	0.0219711	0.0164398	0.0337689	0.0218787	0.0279143	0.0187126	0.0219457	0.0276113	0.032882	0.022596	0.0206554	0.0242008	0.0245215	0.0283008	0.0315385	0.046403	0.0216463	0.0255513	0.026201	0.0383565	0.0288689	0.0292572	0.0280086	0.0335668	0.0305387	0.0367666	0.0371103	0.0312542	0.0355048	0.0394564	0.0348365	0.0342093	0.0282362
0.03245	0.0332201	0.0321295	0.0184571	0.0204014	0.0144914	0.0145966	0.0237649	0.0150277	0.0202546	0.0167069	0.0180344	0.0130711	0.0179277	0.0126781	0.0235774	0.0256176	0.0151184	0.0122826	0.0293822	0.0176323	0.0199132	0.0161832	0.0157654	0.0203288	0.0250109	0.014955	0.018974	0.0190632	0.0243807	0.0272035	0.0161722	0.0249288	0.0145	0.0130759	0.0189619	0.0202525	0.0200744	0.0173417	0.0184353	0.0217255	0.0222163	0.0272332	0.031098	0.0237551	0.0252039	0.0294073	0.0243939	0.0176698	0.0212046
0.0199943	0.0247662	0.0270444	0.0147979	0.0166721	0.0207994	0.0110853	0.019761	0.0146874	0.0159948	0.0154386	0.0260386	0.0127807	0.0158364	0.0202891	0.0206668	0.016722	0.015092	0.0146034	0.0197116	0.0161594	0.0168354	0.015567	0.0146035	0.0201143	0.0206524	0.0142089	0.0241189	0.018963	0.0205076	0.0470868	0.0149484	0.0201765	0.013353	0.01482	0.0163814	0.0172609	0.0194181	0.0184126	0.0166519	0.0204361	0.0180358	0.0195206	0.0168381	0.0176053	0.0189895	0.0190002	0.0178473	0.0141455	0.0168859
0.084427	0.0877073	0.0678132	0.0571215	0.0620092	0.0287689	0.0535515	0.0474009	0.0390567	0.0518994	0.0381857	0.0248551	0.0346039	0.0328627	0.0229654	0.0590357	0.0609797	0.0319543	0.0217207	0.0789596	0.0332056	0.0596067	0.0382854	0.0301164	0.038369	0.0763363	0.0373894	0.0346128	0.0313078	0.0433509	0.0445609	0.0767684	0.10817	0.0384595	0.049772	0.0605069	0.0942809	0.0713013	0.0652953	0.0513747	0.0656462	0.058567	0.0695539	0.0829745	0.0633916	0.0715587	0.0766996	0.0708421	0.0643734	0.0578196
0.0884487	0.0563316	0.088551	0.0904821	0.0966611	0.0370138	0.0399281	0.0666115	0.0484135	0.0856996	0.0484816	0.026408	0.0459111	0.0446417	0.0316375	0.0652258	0.10512	0.0346856	0.0330448	0.0520336	0.0426025	0.0679134	0.0504339	0.0450857	0.0564825	0.0858208	0.0625442	0.0353704	0.0508237	0.0710598	0.0531323	0.275185	0.290948	0.0855019	0.118667	0.112702	0.235565	0.156643	0.155368	0.160137	0.148585	0.147647	0.131314	0.134014	0.0949388	0.128475	0.155987	0.124966	0.112247	0.134756
0.048178	0.0345013	0.0622612	0.0471654	0.0546003	0.0320718	0.0193704	0.0442213	0.0337054	0.0423773	0.0349193	0.0251161	0.0309268	0.0320594	0.0202149	0.0455261	0.0509431	0.025736	0.0208492	0.0385427	0.0248058	0.0404092	0.0249292	0.0256514	0.0328105	0.0516193	0.0304	0.026139	0.0298518	0.0375441	0.0427183	0.0518933	0.0916486	0.0296586	0.0356809	0.0378045	0.0853715	0.0563383	0.0517982	0.0421625	0.0596663	0.0571629	0.0555904	0.067743	0.0542488	0.0582027	0.0771032	0.0665892	0.0549545	0.0529173
0.0655103	0.0442759	0.0717315	0.0685657	0.0746845	0.0288234	0.0312736	0.0525431	0.0367916	0.0611203	0.0409154	0.0231259	0.0373794	0.0348536	0.0224798	0.0577806	0.0699349	0.0307759	0.0217818	0.050372	0.033242	0.0589897	0.036494	0.0297877	0.0405969	0.0723786	0.0414218	0.0297447	0.0324712	0.048647	0.0434246	0.0928289	0.143928	0.0476947	0.0570498	0.0669435	0.132046	0.0904609	0.0781684	0.0638856	0.0923476	0.0713208	0.0776151	0.0841634	0.0702762	0.0835221	0.0949586	0.0837962	0.0757142	0.0712842
0.0981419	0.0545484	0.0973554	0.0985279	0.101295	0.0402988	0.0375956	0.0765299	0.0515945	0.0903427	0.0536166	0.0351208	0.0456531	0.0504603	0.0335621	0.0653422	0.123942	0.0399644	0.0339897	0.0522568	0.0418701	0.070161	0.0584891	0.0474993	0.0630452	0.105823	0.0654298	0.0375225	0.0510906	0.0723795	0.0585275	0.243736	0.328355	0.0729678	0.0961435	0.0997024	0.271995	0.167143	0.12344	0.127278	0.137676	0.122494	0.127394	0.128067	0.102192	0.145578	0.141357	0.13128	0.115857	0.131912
0.0898481	0.0496742	0.0998325	0.099401	0.108899	0.0428162	0.0338822	0.0805906	0.0551308	0.100335	0.058612	0.0325712	0.0467734	0.0585534	0.0338062	0.069795	0.134737	0.0442708	0.0363404	0.0553994	0.0433573	0.0719376	0.0602258	0.0502625	0.0648881	0.107118	0.0661354	0.0377132	0.0551636	0.071122	0.0622055	0.246066	0.379025	0.0732565	0.0962605	0.112741	0.360581	0.197378	0.144656	0.136053	0.154511	0.13902	0.148075	0.150979	0.127162	0.16371	0.207152	0.159926	0.134492	0.151563
0.0727244	0.0386862	0.0892224	0.0786274	0.0893464	0.0361811	0.0255564	0.0729204	0.0475165	0.0723766	0.0441106	0.0242369	0.0404105	0.0433528	0.0257099	0.0540101	0.111849	0.0349478	0.0267766	0.0418751	0.0344173	0.0560908	0.0437476	0.0368915	0.0528058	0.0782667	0.0542034	0.042968	0.0462803	0.0614226	0.0561461	0.119216	0.192643	0.0512457	0.0685104	0.0807824	0.203859	0.125151	0.101921	0.0917872	0.117627	0.116936	0.101099	0.100456	0.0864853	0.106317	0.157847	0.106558	0.0919632	0.109345
0.0882339	0.0540547	0.0976231	0.101702	0.100582	0.045607	0.0346479	0.0831066	0.0487378	0.0887331	0.0525715	0.0270778	0.0479274	0.0508914	0.0259208	0.0736721	0.147545	0.0371725	0.0289068	0.0566769	0.0412649	0.0824612	0.0683065	0.0369259	0.0576743	0.103607	0.0579405	0.0471545	0.0487837	0.0770253	0.0602866	0.150719	0.230107	0.0641012	0.0791169	0.0954782	0.310474	0.154007	0.107743	0.101468	0.137984	0.125135	0.110813	0.122685	0.0983731	0.126827	0.144621	0.114527	0.114249	0.112376
0.0654527	0.0719838	0.0639348	0.061051	0.0522197	0.02954	0.046183	0.0473697	0.0339272	0.0423664	0.0286102	0.0192668	0.0389049	0.0280707	0.0209518	0.053642	0.066721	0.0231155	0.0157198	0.0735045	0.0251323	0.0530483	0.0330325	0.0220908	0.0322838	0.0728588	0.0293431	0.0412363	0.0290827	0.0422945	0.0440808	0.0542931	0.0858257	0.037577	0.0357387	0.0524973	0.0738726	0.0639311	0.0495171	0.041702	0.0639632	0.0537522	0.0480843	0.0578919	0.0519441	0.0671969	0.0592737	0.0585124	0.0523572	0.0454223
0.0891925	0.198164	0.0568805	0.0844939	0.053428	0.0185461	0.0936998	0.0473129	0.0329451	0.0420236	0.0319066	0.017741	0.0485931	0.0275447	0.0264873	0.0681113	0.0501808	0.0359791	0.0198782	0.115334	0.0306239	0.0751604	0.0789514	0.0270176	0.0370875	0.101315	0.0431856	0.26541	0.0397555	0.0555193	0.118933	0.0281874	0.0372634	0.0214495	0.0220982	0.0250537	0.0323842	0.0317784	0.0267498	0.0217642	0.0308306	0.0284866	0.026425	0.0323062	0.0257966	0.037421	0.0291752	0.0336295	0.0252817	0.030002
0.0270463	0.0483459	0.0287361	0.0272403	0.0282201	0.0193514	0.0301937	0.0241197	0.0183951	0.027419	0.0255386	0.0212871	0.018183	0.0221821	0.014945	0.0329432	0.0303766	0.0187874	0.0167179	0.0587738	0.0215266	0.0269238	0.0210037	0.0260159	0.0304435	0.0365879	0.0258102	0.0259505	0.0361652	0.0382645	0.0356124	0.0227151	0.0303256	0.0162952	0.0189051	0.0240672	0.0262281	0.025267	0.0228089	0.0254017	0.0297837	0.0340683	0.0290401	0.0330362	0.031126	0.0349323	0.0378535	0.0298796	0.0255167	0.0281496
0.0227824	0.0244977	0.0310862	0.0297129	0.0276703	0.0191872	0.0161963	0.0234355	0.0184449	0.026056	0.0212042	0.0217242	0.0216498	0.0180857	0.0155073	0.0296856	0.0247284	0.0163254	0.0123375	0.0312018	0.0178156	0.0262157	0.0188015	0.0179946	0.0220097	0.0354723	0.018712	0.0244297	0.0220401	0.0278035	0.0254939	0.0318458	0.0403732	0.021612	0.0224445	0.0303585	0.0417546	0.0339751	0.0301976	0.021856	0.031943	0.0320897	0.0241475	0.0279831	0.023295	0.0311984	0.0340566	0.0255161	0.0358134	0.0258385
0.0251484	0.073583	0.0239219	0.0235651	0.0252185	0.0174222	0.0352168	0.0188466	0.0145482	0.0253217	0.0225074	0.0250617	0.0162258	0.0198483	0.0138803	0.0294296	0.0280837	0.0156515	0.0171933	0.0660946	0.0192558	0.0263333	0.0209241	0.0258532	0.033194	0.0337993	0.032329	0.0296948	0.0395878	0.0364071	0.0404657	0.0196786	0.0254431	0.0165731	0.0151982	0.0162372	0.021925	0.0181138	0.0185016	0.0231608	0.0231449	0.0272913	0.0199617	0.0240842	0.0203305	0.0218654	0.0281565	0.0230344	0.019332	0.0295597
0.0145174	0.0166793	0.0238846	0.0240693	0.0243206	0.0183385	0.00917637	0.0219755	0.0144325	0.0265055	0.0237174	0.0259157	0.0146886	0.0156167	0.0127453	0.024838	0.0255404	0.0144582	0.0154457	0.0230708	0.0195438	0.0230268	0.025698	0.0231948	0.032701	0.0226733	0.031778	0.0226858	0.0381615	0.033135	0.0267915	0.0138434	0.018363	0.0142677	0.0157969	0.0162594	0.0178005	0.0154217	0.0165573	0.020713	0.0228533	0.0240821	0.0180741	0.0172059	0.014698	0.0240978	0.0250954	0.0169657	0.0192773	0.0235771
0.0291777	0.0259024	0.0321052	0.0249264	0.0251312	0.0114027	0.0146653	0.0196838	0.0152168	0.024145	0.0211363	0.0157864	0.0221275	0.0196117	0.0171998	0.0280759	0.0222072	0.0225367	0.0178794	0.0235002	0.0216858	0.0243174	0.0151605	0.0177538	0.0246288	0.0261129	0.0177022	0.0182727	0.0186282	0.0203509	0.0232797	0.0390699	0.0450941	0.0305302	0.0281573	0.03125	0.0429162	0.0426883	0.0354598	0.0360353	0.0353123	0.0342063	0.0390974	0.0325954	0.0308088	0.0339148	0.0465395	0.0342736	0.0370483	0.0311875
0.0355608	0.0552903	0.0167958	0.0190957	0.0183079	0.0131704	0.0187882	0.0165924	0.0188591	0.0148323	0.0174314	0.0141761	0.0132306	0.0130599	0.0135641	0.0196114	0.0151609	0.0203585	0.0112242	0.0292525	0.014956	0.0173955	0.0166458	0.0138054	0.0172504	0.0176745	0.0142769	0.0254024	0.0138573	0.0182258	0.0214129	0.0346371	0.0340853	0.0178504	0.0244179	0.0222786	0.0244694	0.0232426	0.0230458	0.0199455	0.0174115	0.02266	0.0204169	0.020986	0.0155875	0.0238648	0.0239091	0.0184618	0.0201141	0.0168966
0.031699	0.0516332	0.0274828	0.0233832	0.0257943	0.0184113	0.0391096	0.0208459	0.0187238	0.022993	0.0214757	0.01704	0.0181486	0.0167701	0.0168886	0.0338364	0.031678	0.0168983	0.014496	0.0579213	0.0205349	0.030958	0.0197158	0.0215423	0.0283862	0.0389771	0.0184887	0.0186881	0.023963	0.0316321	0.0277587	0.0259143	0.0326701	0.0211699	0.0219556	0.0303057	0.0308771	0.0295856	0.0257438	0.0267661	0.0317664	0.032246	0.0328168	0.03617	0.0286141	0.0336309	0.0329748	0.035366	0.0286274	0.0262125
0.0259507	0.0689184	0.0176621	0.0187044	0.0188813	0.0153776	0.0447567	0.0148721	0.0153082	0.0166165	0.0200808	0.0137633	0.0217625	0.0119415	0.0141197	0.0327546	0.0216171	0.0181393	0.0131579	0.0774025	0.0175741	0.0291465	0.0170057	0.0188707	0.0249164	0.0319789	0.0142921	0.0139102	0.0201791	0.023049	0.0206271	0.0215443	0.0282562	0.025893	0.0155302	0.0271034	0.0214983	0.0288834	0.017493	0.0180165	0.019193	0.019803	0.0201452	0.0197246	0.0184714	0.0174874	0.0190051	0.0212391	0.0245645	0.0195756
0.0300979	0.0193524	0.0255967	0.0237534	0.0258086	0.0149514	0.0137052	0.0186799	0.0205007	0.0214854	0.019061	0.0208427	0.0181046	0.0198897	0.0180443	0.0271928	0.0198993	0.0184806	0.0161618	0.0191741	0.0206228	0.0254999	0.0160442	0.0170464	0.0218268	0.0257434	0.0200784	0.0183999	0.0228072	0.0238688	0.0246975	0.0365374	0.0400831	0.0211472	0.0230107	0.0234339	0.0387135	0.0293726	0.0349009	0.0309764	0.0284782	0.0340073	0.0354217	0.0330614	0.0259654	0.026604	0.049854	0.0278547	0.026645	0.0229914
0.0133551	0.0129099	0.0201615	0.017025	0.0225289	0.0156195	0.0100448	0.0185025	0.0173959	0.0195225	0.0179781	0.0188924	0.0143736	0.014948	0.0136805	0.021252	0.020413	0.0139367	0.0126569	0.0173952	0.0193637	0.0223517	0.0148876	0.014437	0.0212828	0.0216214	0.0171626	0.0158088	0.0217037	0.019245	0.0309842	0.0164878	0.0210241	0.0170294	0.0156445	0.021769	0.0177872	0.0167875	0.0209477	0.0191324	0.0241687	0.0193273	0.0179595	0.0186321	0.0136337	0.0188412	0.0156839	0.0157284	0.0205591	0.0160241
0.0294201	0.0186169	0.0299473	0.0297207	0.0318875	0.0154994	0.0128337	0.0197749	0.0209797	0.0241841	0.0205517	0.0199501	0.0197632	0.0225427	0.0171926	0.0289588	0.0205661	0.0208639	0.0188191	0.0226019	0.0222741	0.0275873	0.0189605	0.0192045	0.0240223	0.0259397	0.0225376	0.0180859	0.0223291	0.0237755	0.0222126	0.0484914	0.0547209	0.0330509	0.0357358	0.0347436	0.0570711	0.0439462	0.0446538	0.0458336	0.0386843	0.0497903	0.0451902	0.0367632	0.0308993	0.03168	0.0800939	0.0368996	0.0397966	0.0370839
0.0188784	0.0366784	0.0192888	0.0165832	0.0220856	0.0141718	0.0267609	0.0213549	0.0169871	0.0201302	0.0196601	0.0126476	0.01377	0.0155151	0.0110981	0.0240525	0.0205085	0.0161071	0.0127106	0.047087	0.0174416	0.0231555	0.0187192	0.0143988	0.0219759	0.0276325	0.0156541	0.0181454	0.0178712	0.0208616	0.0265791	0.0202634	0.0243451	0.0179892	0.0185496	0.0216475	0.0205608	0.0200401	0.0189453	0.0211422	0.0221333	0.0255563	0.0173535	0.0194214	0.0180678	0.0256381	0.0228699	0.0208689	0.0207951	0.021149
0.0149046	0.0342096	0.0192291	0.017138	0.0187432	0.0175858	0.0258486	0.0209397	0.0148258	0.0191418	0.0178885	0.0106781	0.0180595	0.0169637	0.0134359	0.0211932	0.0201669	0.0161843	0.0139961	0.0439891	0.0143545	0.0213211	0.0215159	0.0183999	0.0188375	0.0245277	0.0175323	0.0222238	0.0214898	0.0178709	0.0229851	0.0280658	0.0275948	0.0276241	0.0158256	0.027632	0.0188654	0.0284902	0.0168725	0.0188817	0.0187191	0.0240511	0.0162359	0.0169059	0.0150924	0.0224032	0.0179976	0.0151832	0.0178045	0.0161037
0.0344995	0.0215587	0.0302412	0.03563	0.0317345	0.0170445	0.0156461	0.0196358	0.0194952	0.0230382	0.0194246	0.0183902	0.0226484	0.0224405	0.0200335	0.0296452	0.0217797	0.0236668	0.0168142	0.0239893	0.0228571	0.0289475	0.0170343	0.0181468	0.0242479	0.0253848	0.0187893	0.018743	0.0193895	0.0219995	0.0204102	0.0554966	0.0650816	0.0340139	0.0404785	0.0409718	0.0701958	0.0524915	0.0527689	0.0581614	0.0454328	0.0621916	0.0720441	0.0517173	0.0428815	0.0440702	0.113247	0.0489807	0.0445852	0.0468992
0.0203615	0.0343211	0.024751	0.0182093	0.0230466	0.0163132	0.0173699	0.0217479	0.0189673	0.0222567	0.0168036	0.0159426	0.0155648	0.0148074	0.014682	0.0281015	0.0215983	0.0150675	0.0144361	0.0397968	0.0205866	0.0217743	0.0161147	0.0169968	0.0247455	0.0331463	0.0164504	0.0239511	0.0223729	0.0255518	0.033299	0.0150816	0.0222142	0.013309	0.0121355	0.0150101	0.0202281	0.0208197	0.0197073	0.0189783	0.0201265	0.02057	0.0167449	0.0196264	0.0160218	0.020622	0.0180311	0.0198931	0.0185413	0.0210595
0.019071	0.0205	0.0257848	0.0181333	0.0242264	0.0225079	0.01668	0.0252585	0.0223166	0.0183427	0.0202946	0.0133662	0.0167643	0.022255	0.0143035	0.0237877	0.0300262	0.0256934	0.0144732	0.0215093	0.0244799	0.0250629	0.0204159	0.0177261	0.024002	0.0232515	0.0196632	0.0205914	0.0193682	0.021039	0.0212993	0.0450826	0.0474483	0.046495	0.0232122	0.0445031	0.0323767	0.0447713	0.0276013	0.0222015	0.0276594	0.0205753	0.0179936	0.017437	0.0154122	0.0236249	0.0170264	0.0186855	0.0270215	0.0204076
0.0240247	0.0321802	0.0268511	0.0236319	0.0239328	0.0181039	0.0205966	0.0199916	0.0146341	0.0234915	0.0238066	0.0174047	0.0177201	0.016961	0.0136413	0.0271949	0.0196076	0.0182192	0.0152589	0.0305348	0.0207308	0.0252731	0.0194069	0.0193347	0.0274822	0.0280733	0.0181251	0.0188642	0.0272515	0.0292303	0.0273515	0.0312077	0.0374697	0.0269099	0.0234186	0.0275839	0.0308787	0.0304136	0.027879	0.0278275	0.0294373	0.0292403	0.028416	0.0272414	0.0246647	0.0272131	0.0319847	0.0262225	0.0288189	0.0215603
0.0268076	0.0295739	0.0333824	0.018053	0.0223924	0.0192591	0.0168777	0.0240402	0.019773	0.0220924	0.0173602	0.0179728	0.0163186	0.0185428	0.0146734	0.0277734	0.0221624	0.0142959	0.0128986	0.031984	0.018161	0.0233839	0.016526	0.01307	0.0196373	0.0263221	0.0130317	0.0159698	0.0175858	0.0266351	0.0228259	0.0192418	0.0264581	0.0132247	0.0166223	0.0198061	0.0282673	0.0230207	0.024462	0.02734	0.0214836	0.0276747	0.0297683	0.0312769	0.0245828	0.0287318	0.0377951	0.0229887	0.0224512	0.0206579
0.0180346	0.0180716	0.0242195	0.015566	0.0213022	0.0203531	0.0131583	0.019134	0.0163102	0.015965	0.0147734	0.0147677	0.0115545	0.0165551	0.0129908	0.0181779	0.0215509	0.0142929	0.0153321	0.018919	0.0191039	0.0163147	0.0152496	0.0131556	0.0209932	0.0206693	0.0141362	0.0149361	0.0141213	0.022288	0.015295	0.0194013	0.0246332	0.0136385	0.0146144	0.0164305	0.0214514	0.0184536	0.0191773	0.0207044	0.0175292	0.0220602	0.02204	0.0203147	0.016508	0.0182259	0.0270703	0.0182264	0.0214373	0.0207999
0.0312405	0.0793098	0.0256855	0.0229838	0.0250267	0.0210043	0.036214	0.0213892	0.0223752	0.0195848	0.020955	0.0149243	0.0175958	0.016508	0.0141947	0.0292033	0.0220703	0.018385	0.0141359	0.0621123	0.0188382	0.0288431	0.0216182	0.0174794	0.025845	0.0364126	0.0204495	0.0300775	0.0237451	0.0256084	0.0357386	0.022024	0.025431	0.0198869	0.0186784	0.0227342	0.0247051	0.0248223	0.0227847	0.0237189	0.0251541	0.0287655	0.0261673	0.0260678	0.0241245	0.0246413	0.0312846	0.0273074	0.0216689	0.0256295
0.022356	0.0255844	0.0253281	0.0184481	0.0208147	0.015438	0.0137816	0.017566	0.0162936	0.0208465	0.0191914	0.0260301	0.0154328	0.0176816	0.0191248	0.0234815	0.0208829	0.0170985	0.0170718	0.0213427	0.0192049	0.0205521	0.020702	0.0162157	0.0276527	0.0217672	0.0200569	0.0234088	0.0267964	0.0318782	0.0418622	0.0184145	0.0267159	0.0181781	0.0154185	0.0195878	0.0205305	0.0211169	0.026122	0.023825	0.024026	0.027157	0.0239616	0.0240895	0.0201435	0.0230385	0.0298266	0.0212758	0.0202939	0.0227552
0.022	0.0176654	0.0203897	0.0170405	0.0139158	0.0132014	0.0134446	0.0150112	0.0127913	0.017688	0.0142691	0.0215245	0.0161203	0.0152852	0.0140552	0.0214175	0.0143106	0.0131218	0.0112978	0.019043	0.018733	0.0174827	0.0130328	0.0125771	0.0176339	0.0218838	0.0113757	0.0181763	0.019677	0.0271565	0.0205465	0.0175292	0.0231728	0.012715	0.0154943	0.0160821	0.0201899	0.0161514	0.0175255	0.0218973	0.018884	0.0243129	0.0218089	0.0221636	0.018225	0.0203295	0.0277762	0.0179136	0.0160134	0.0179945
0.0217938	0.0486447	0.0223903	0.0164109	0.0205008	0.0174221	0.0220464	0.0177425	0.0156654	0.0213662	0.0182186	0.0151442	0.0151402	0.0147943	0.013174	0.026259	0.0183694	0.0165564	0.0120764	0.0432922	0.018855	0.0215802	0.0180461	0.0172423	0.0245498	0.0228464	0.0171651	0.0195243	0.0250642	0.031181	0.0289082	0.0182017	0.0207175	0.0138652	0.0136363	0.0178934	0.0182144	0.0174364	0.0193272	0.0245035	0.0191237	0.0286906	0.0208875	0.0222892	0.0209123	0.0182538	0.0302748	0.0209693	0.0171678	0.0216912
0.0420147	0.0300593	0.0390421	0.0407768	0.0400246	0.0162492	0.0208738	0.0342137	0.0296417	0.0285981	0.0283567	0.0225608	0.0279836	0.0217839	0.0227969	0.0365242	0.0352567	0.0265968	0.015691	0.0300006	0.0263859	0.0336911	0.0263517	0.0211293	0.0283912	0.0370154	0.0260598	0.0357897	0.0261905	0.0378768	0.0451403	0.036197	0.0549034	0.0268799	0.0283686	0.0351533	0.053458	0.0417254	0.0442174	0.0400512	0.045443	0.0475602	0.0455995	0.0445572	0.0459045	0.0506063	0.0872802	0.0534898	0.0374635	0.0501351
0.0264991	0.044734	0.0225369	0.0154756	0.0218751	0.0199998	0.0192267	0.0180899	0.0178047	0.0169896	0.0179692	0.0211767	0.0131699	0.0189896	0.0174155	0.0211633	0.0181003	0.0152836	0.0204379	0.0323672	0.0185167	0.0189115	0.0192843	0.0158015	0.0234072	0.0187308	0.0189899	0.0596665	0.0222512	0.0242147	0.0498624	0.015952	0.0216017	0.0171765	0.0142766	0.0162661	0.0183599	0.019954	0.0210469	0.0216914	0.0194951	0.0197705	0.0200197	0.0226475	0.0196353	0.0219014	0.0262772	0.0204192	0.0181224	0.0200815
0.026892	0.0705224	0.0182054	0.018715	0.0184858	0.0181521	0.0266923	0.0159964	0.0137598	0.0155686	0.0150674	0.0157981	0.015721	0.0210403	0.013958	0.0205706	0.0189604	0.0145157	0.017576	0.0414156	0.0166275	0.0217259	0.0230613	0.0172406	0.0223621	0.0218417	0.0187717	0.0489625	0.0253964	0.0215101	0.0335354	0.0186118	0.0205679	0.016498	0.0142948	0.0141471	0.0159587	0.0155516	0.0195519	0.0200002	0.0176291	0.0186067	0.0198272	0.0205866	0.0174659	0.0163572	0.0208107	0.017408	0.0181107	0.0190219
0.0154487	0.0136163	0.0179453	0.0156362	0.0169187	0.0164126	0.0107921	0.0158866	0.0129952	0.0164741	0.0152537	0.0147491	0.0159079	0.0148334	0.014512	0.0212402	0.0148601	0.0133204	0.0134318	0.0153501	0.0165949	0.0175681	0.0178286	0.0160925	0.0221879	0.0197843	0.0166831	0.0191986	0.0236974	0.0238228	0.0195646	0.0175371	0.0216281	0.0133651	0.0131851	0.0179018	0.017414	0.0158575	0.0188313	0.0228701	0.0174382	0.0208673	0.0217408	0.0202417	0.0177507	0.0160598	0.0335523	0.0168123	0.0175873	0.0182212
0.0240206	0.0145571	0.024038	0.0243944	0.0283108	0.0139224	0.011686	0.0210186	0.018309	0.0206686	0.013781	0.0182213	0.015469	0.0190205	0.0183263	0.0211909	0.0252214	0.0192902	0.0183706	0.0163639	0.0223986	0.0198118	0.0165767	0.0183293	0.0229091	0.0187059	0.0201315	0.0173239	0.018349	0.0206875	0.0195574	0.0323108	0.0482389	0.0212422	0.0339525	0.0345206	0.0553713	0.0481899	0.0437914	0.0586052	0.0427734	0.0577906	0.0662977	0.0386261	0.0444498	0.0432261	0.157835	0.0555872	0.0476491	0.0711337
0.0492354	0.125561	0.0270493	0.0500368	0.0317456	0.0194008	0.100255	0.0185003	0.0240794	0.0428455	0.0323669	0.0153744	0.0552725	0.0204992	0.0230028	0.109128	0.0234355	0.0326541	0.0114973	0.240622	0.0432629	0.100099	0.0243668	0.0211978	0.0314754	0.0946977	0.0170617	0.050719	0.0209564	0.0336058	0.0304352	0.0219641	0.0310959	0.0233119	0.0182667	0.0259603	0.0245007	0.0324284	0.0241288	0.0207399	0.0254009	0.0254517	0.0232572	0.0224501	0.0247281	0.0240805	0.0244515	0.0249308	0.0212107	0.0200725
0.0767708	0.205719	0.0406315	0.102357	0.0571448	0.0215119	0.137047	0.0275493	0.0376114	0.0689132	0.0444507	0.0165137	0.0899444	0.0195606	0.0228464	0.134148	0.0377231	0.0413367	0.0132198	0.265278	0.0604474	0.173806	0.0482202	0.0268232	0.0485276	0.287714	0.0304201	0.0962565	0.0319106	0.0727193	0.049019	0.036076	0.0482131	0.031724	0.0276098	0.0423194	0.0370874	0.0421875	0.0324779	0.0225665	0.0370471	0.0326873	0.02911	0.0334873	0.0316891	0.0329361	0.0289144	0.0412087	0.033354	0.0352588
0.0355525	0.0750786	0.0239294	0.0229156	0.025546	0.0147123	0.0470365	0.0213699	0.0194076	0.0261247	0.0253879	0.0171444	0.0226842	0.0160107	0.016667	0.0398887	0.0228086	0.0183052	0.0137823	0.113666	0.0174437	0.032529	0.0180905	0.021392	0.0229445	0.0536077	0.0172155	0.0253178	0.0248176	0.0284362	0.0258484	0.0164167	0.0257537	0.015933	0.0179975	0.0185733	0.0258958	0.0210077	0.0181936	0.0234793	0.021353	0.0277934	0.0198395	0.0234828	0.0208199	0.0230434	0.0255213	0.0242656	0.0217917	0.0241716
0.0146905	0.0110351	0.0156292	0.0159308	0.0185544	0.0110206	0.01027	0.0170461	0.0127427	0.0153353	0.013141	0.0180596	0.0136552	0.0135756	0.0123155	0.0170697	0.0179337	0.0153835	0.0138437	0.0255689	0.0152918	0.0142842	0.0131807	0.0108814	0.0143709	0.0324409	0.0123085	0.0154403	0.0121901	0.0299162	0.015271	0.0128924	0.0196625	0.0120612	0.0107987	0.0114455	0.0161208	0.0126773	0.0111495	0.012529	0.0129623	0.0159059	0.0161924	0.0164448	0.0129874	0.0236869	0.0191189	0.0170642	0.0215603	0.0149656
0.0314633	0.041043	0.0271494	0.0480275	0.0374178	0.0145622	0.0339598	0.0252615	0.025282	0.0413082	0.0338027	0.0173665	0.0470955	0.0165566	0.019967	0.0711408	0.0263807	0.0405377	0.0157896	0.0848895	0.0626325	0.0833078	0.0268181	0.0253504	0.0505038	0.174146	0.0245266	0.0496622	0.0274488	0.120499	0.0309834	0.0224704	0.0274364	0.0189939	0.0143469	0.0169868	0.0229649	0.0212087	0.0196299	0.0203508	0.0187606	0.0213146	0.0207528	0.0200644	0.0171545	0.0320068	0.0243285	0.0225406	0.0192268	0.0242286
0.0289469	0.0480124	0.0243704	0.0260648	0.0229961	0.0164816	0.034104	0.0220405	0.0186489	0.0269125	0.0249397	0.0199352	0.0211006	0.0154892	0.0175801	0.036787	0.0229634	0.0190598	0.0136265	0.0876193	0.0192839	0.0288984	0.017448	0.0219809	0.0253105	0.0596089	0.01832	0.0220273	0.0226197	0.0274482	0.0230585	0.0181173	0.0257722	0.0124763	0.0190324	0.0187212	0.0228716	0.0198295	0.0173656	0.0223479	0.020306	0.0296575	0.0224489	0.0233232	0.0213957	0.0260559	0.026327	0.0247974	0.0229213	0.0264066
0.0190798	0.0304483	0.0212781	0.019818	0.0198181	0.0158327	0.0212649	0.0237819	0.0195022	0.0203018	0.017959	0.0232593	0.0171349	0.0122031	0.0153257	0.0233422	0.0192742	0.0134868	0.0123528	0.0531047	0.0138612	0.0197868	0.0188456	0.0161066	0.0184142	0.0280162	0.0190492	0.0232692	0.0217233	0.0213278	0.0274714	0.0147162	0.0219589	0.0134415	0.0203248	0.0146682	0.0217742	0.0144141	0.0162816	0.0215837	0.0204508	0.0282606	0.0164123	0.0186952	0.0163955	0.0290608	0.0240629	0.0199107	0.0256497	0.0239144
0.0220967	0.0481341	0.021752	0.0233725	0.0211896	0.0132497	0.0240558	0.0195453	0.0135102	0.0196117	0.019466	0.0177875	0.0179632	0.0107482	0.0128078	0.020066	0.0237989	0.0127138	0.0115516	0.0491494	0.0139302	0.0193393	0.0206943	0.0168068	0.0233688	0.0261406	0.0214406	0.0266426	0.0266352	0.0227325	0.0293576	0.0131963	0.0224319	0.014323	0.0156179	0.0135432	0.0221293	0.0183438	0.0120508	0.0184544	0.0207328	0.0215691	0.0163379	0.0161486	0.0123082	0.0175032	0.0237597	0.0159873	0.0220747	0.0208376
0.0178871	0.016602	0.022941	0.0220936	0.0276313	0.0153824	0.0139857	0.0182565	0.0180088	0.0190824	0.0176144	0.0143391	0.0147119	0.0126607	0.0140489	0.0161385	0.0216422	0.015442	0.0143763	0.0204978	0.0139774	0.0160722	0.0240901	0.0163152	0.0180342	0.0229703	0.0207869	0.0227771	0.0202468	0.0251795	0.020338	0.0204315	0.0292873	0.0181848	0.0214297	0.0206119	0.0229474	0.0199496	0.0191145	0.0208483	0.0219842	0.0247298	0.0223113	0.0169905	0.0179817	0.0227136	0.0247514	0.0221364	0.035012	0.0217762
0.0257195	0.0355804	0.0225063	0.0280714	0.0258239	0.0150884	0.0230701	0.0199445	0.0201583	0.0295889	0.0219269	0.0223007	0.0226754	0.0194165	0.0222365	0.0333252	0.0273589	0.0198323	0.0160976	0.04888	0.0187734	0.0270914	0.020932	0.0213272	0.0259627	0.0472111	0.0182834	0.0331524	0.0231541	0.0349632	0.0352876	0.0256341	0.0377923	0.0173723	0.0251395	0.0197018	0.0277286	0.0278692	0.0248751	0.0285153	0.0274378	0.0328095	0.0292169	0.026915	0.0233756	0.0329618	0.0326169	0.0302631	0.0242586	0.0280886
0.0393487	0.050825	0.0393836	0.0417822	0.0329326	0.0208889	0.0463232	0.029702	0.0279694	0.035943	0.0260744	0.019694	0.0370529	0.0185313	0.0172267	0.0526143	0.0355911	0.0225189	0.0123205	0.0841841	0.0289977	0.0573639	0.0312303	0.0236017	0.0369524	0.0778356	0.0252162	0.0428568	0.0286863	0.0447186	0.0471466	0.0307655	0.0479337	0.0249975	0.0305811	0.0299945	0.0416889	0.0329224	0.0333454	0.0298975	0.0371037	0.0331778	0.0311753	0.0327705	0.0300854	0.0374708	0.0336906	0.0354091	0.040698	0.0352359
0.247964	0.142403	0.213328	0.181404	0.164023	0.0756207	0.066557	0.187568	0.0767595	0.0911331	0.0678474	0.0237385	0.0566741	0.0738931	0.03019	0.0735406	0.119944	0.0462185	0.0345328	0.0706023	0.0486602	0.073201	0.14978	0.0530842	0.0665797	0.0957752	0.118437	0.138301	0.0687125	0.0764849	0.100818	0.0670444	0.0818639	0.0348163	0.0472879	0.056687	0.0729124	0.0654548	0.0502583	0.0449565	0.0662486	0.0546705	0.0430469	0.0536298	0.036913	0.0803118	0.0550019	0.0579295	0.0710293	0.0696568
0.136811	0.222579	0.0737573	0.126635	0.0780993	0.0267976	0.113366	0.0586209	0.0411021	0.0546044	0.0461102	0.0152187	0.0642562	0.029887	0.0180217	0.0621611	0.0539766	0.0286552	0.0160528	0.092399	0.0313634	0.0732191	0.0748145	0.0274293	0.0332243	0.0887306	0.0538518	0.11707	0.0318294	0.0437865	0.0558996	0.0447736	0.0545549	0.0279032	0.0389067	0.0427162	0.0492865	0.047621	0.0349925	0.0328889	0.0444351	0.0420207	0.0351548	0.0380375	0.0317746	0.0530089	0.0384394	0.0418495	0.0442146	0.0428276
0.253468	0.0868014	0.482372	0.296202	0.362833	0.190006	0.0585869	0.355576	0.168502	0.202614	0.166603	0.0453673	0.0943544	0.207551	0.0630993	0.154273	0.264014	0.115668	0.0944593	0.0864986	0.119013	0.145162	0.29991	0.152323	0.181042	0.201243	0.285796	0.19899	0.198743	0.195054	0.187212	0.081826	0.120681	0.0473873	0.0589124	0.0735871	0.0967504	0.0931542	0.0750973	0.0726914	0.0861454	0.0806346	0.061258	0.0721054	0.0552211	0.100734	0.0847806	0.090199	0.092743	0.123409
0.164775	0.0481971	0.49488	0.173165	0.387592	0.487797	0.0347528	0.406653	0.383144	0.169148	0.218967	0.140273	0.0728537	0.403045	0.177938	0.135384	0.301836	0.192826	0.229152	0.0684077	0.138895	0.128059	0.338419	0.274191	0.257419	0.157689	0.379858	0.181016	0.316976	0.219466	0.219623	0.0643129	0.0893499	0.0340235	0.042937	0.0545235	0.0730904	0.0640631	0.057052	0.0509873	0.0667707	0.063086	0.0431618	0.0522044	0.0387255	0.0711161	0.0559887	0.067348	0.0653009	0.0862187
0.211551	0.126128	0.277428	0.573314	0.448488	0.0826298	0.0952895	0.1783	0.147568	0.3302	0.229045	0.0348623	0.146658	0.099958	0.0458199	0.224449	0.18564	0.125799	0.0614811	0.111759	0.17085	0.238011	0.288889	0.149193	0.231845	0.327329	0.323678	0.228279	0.240848	0.287835	0.213087	0.0837212	0.114051	0.0478033	0.0606359	0.0815044	0.0984723	0.0974832	0.0800563	0.0692838	0.0960974	0.0828219	0.0685765	0.0764602	0.0607266	0.100319	0.0824508	0.0894486	0.0977983	0.122942
0.176806	0.0745298	0.414986	0.396359	0.778547	0.201354	0.0528682	0.261891	0.392298	0.373547	0.464351	0.0597215	0.126744	0.217133	0.13376	0.26477	0.310605	0.317445	0.177059	0.102763	0.255297	0.240005	0.37563	0.379895	0.387473	0.316228	0.53554	0.231211	0.433643	0.364767	0.263403	0.0870035	0.129031	0.0514494	0.0581417	0.0855225	0.101593	0.097468	0.0869671	0.0803936	0.0989419	0.0879046	0.0712995	0.0829124	0.0644534	0.108963	0.0899013	0.1053	0.100781	0.140588
0.0654988	0.0949043	0.0544219	0.108941	0.065842	0.0182548	0.101682	0.0359734	0.0306628	0.0661028	0.0427725	0.0101003	0.0751875	0.0217597	0.0152512	0.0736248	0.039064	0.03188	0.0129601	0.0747902	0.0499233	0.0915761	0.0564309	0.022998	0.0378202	0.101073	0.0466876	0.0645803	0.0343376	0.0615083	0.0395446	0.0387788	0.0400362	0.0274519	0.0273829	0.0330006	0.0360589	0.0433934	0.0320263	0.0232879	0.0355979	0.0289799	0.0223764	0.0249537	0.0189681	0.026073	0.0250031	0.0261977	0.0343826	0.0281094
0.0666079	0.0299887	0.170662	0.0763629	0.18115	0.300597	0.0276531	0.144179	0.441198	0.086105	0.140495	0.309282	0.0427388	0.213807	0.297692	0.0836485	0.12022	0.182918	0.202544	0.0514647	0.0874006	0.0748202	0.151522	0.160261	0.115877	0.0772132	0.183804	0.0986094	0.141803	0.0976725	0.107797	0.0326688	0.0479972	0.0215029	0.0280676	0.0324875	0.0417022	0.0362152	0.0348432	0.0293607	0.0367389	0.0346466	0.0270432	0.0312723	0.0235676	0.0379073	0.036968	0.0410175	0.0335441	0.0498026
0.168945	0.0525951	0.324775	0.153055	0.241422	0.213906	0.0281036	0.614648	0.160358	0.127902	0.135416	0.0447136	0.0577479	0.308121	0.0627142	0.0923763	0.424703	0.0900575	0.12414	0.0479557	0.0783144	0.0876069	0.348868	0.165857	0.158288	0.117734	0.336058	0.228809	0.231112	0.160181	0.29779	0.0558906	0.0815115	0.0333675	0.0452396	0.0562216	0.0725531	0.0637776	0.0516417	0.0509203	0.0641497	0.0684622	0.0460807	0.0588117	0.0448191	0.11345	0.0717006	0.0716457	0.0741097	0.097666
0.0607972	0.0200123	0.220988	0.0501793	0.124429	0.381022	0.0176547	0.234848	0.224878	0.0548587	0.0818662	0.240087	0.0309352	0.383018	0.165704	0.0529592	0.161865	0.0873215	0.2338	0.0283783	0.0589611	0.0495818	0.166365	0.155582	0.112567	0.0591299	0.163302	0.07853	0.142307	0.0921795	0.0920202	0.0341444	0.0407768	0.0208261	0.0191791	0.0275073	0.0383156	0.0336746	0.0295549	0.0246276	0.0336718	0.0332142	0.0208382	0.0213976	0.0162117	0.0296228	0.026496	0.027743	0.0348227	0.0486291
0.101339	0.0501591	0.225198	0.294998	0.529445	0.112993	0.0460993	0.155756	0.23961	0.454599	0.624757	0.0392388	0.141631	0.136669	0.101069	0.351839	0.214902	0.364985	0.117953	0.116984	0.409746	0.308168	0.242625	0.376221	0.498327	0.37349	0.38461	0.154139	0.461532	0.426222	0.200341	0.0709909	0.102854	0.0417601	0.0531412	0.0746186	0.0845519	0.072126	0.076294	0.0704661	0.0788669	0.0725811	0.0595716	0.0689271	0.0578232	0.0835771	0.0744389	0.090947	0.0829846	0.125325
0.100294	0.056505	0.183416	0.343195	0.383086	0.074659	0.0568617	0.123879	0.141528	0.580583	0.361293	0.0472371	0.17282	0.0914083	0.0561803	0.428511	0.191181	0.198246	0.0666303	0.136098	0.354129	0.366082	0.189239	0.199163	0.427919	0.479197	0.267141	0.128934	0.326148	0.420925	0.180438	0.0864809	0.126478	0.0511323	0.0643492	0.0935736	0.102886	0.100129	0.0921856	0.0783964	0.103993	0.0843678	0.0678881	0.0824712	0.0654056	0.104766	0.0751217	0.102754	0.106521	0.14383
0.0312943	0.0165332	0.0605344	0.043054	0.050325	0.229877	0.0154862	0.0530037	0.199275	0.0473868	0.0367312	0.84319	0.0240495	0.196522	0.328219	0.0280897	0.0398399	0.0544541	0.289772	0.0189158	0.0294479	0.0251439	0.0484034	0.0488536	0.0413054	0.0403059	0.0410149	0.0311027	0.0417133	0.0371775	0.030211	0.0278555	0.030254	0.0146483	0.0257985	0.0212432	0.0298883	0.0258824	0.029251	0.0270056	0.0286277	0.0240025	0.0346293	0.0296823	0.0257887	0.0338774	0.0295044	0.0292862	0.0272566	0.0381542
0.0880038	0.0699889	0.128614	0.229967	0.204767	0.0447629	0.0780691	0.0775036	0.0862899	0.284136	0.199739	0.0277141	0.213011	0.0591266	0.0398103	0.383918	0.100893	0.158371	0.0468377	0.153083	0.281751	0.370988	0.131674	0.115062	0.257661	0.343876	0.14743	0.0996781	0.179777	0.274526	0.11092	0.0746126	0.102243	0.0600179	0.0523303	0.0867179	0.0794215	0.0867095	0.0761342	0.058463	0.0793978	0.0626995	0.044168	0.0519263	0.0436181	0.0618174	0.05349	0.0709454	0.0813038	0.0979413
0.045131	0.0219806	0.112866	0.0686841	0.155065	0.161676	0.0197257	0.0781081	0.283862	0.0855372	0.205044	0.180495	0.0392404	0.132289	0.456597	0.120217	0.0612061	0.547913	0.198957	0.0560466	0.23483	0.104128	0.109768	0.273373	0.179997	0.0765468	0.131981	0.0750622	0.156237	0.096913	0.0747138	0.0381182	0.0465451	0.0281922	0.0276009	0.0336872	0.0380761	0.0412015	0.0355307	0.0272762	0.0373905	0.0362467	0.0333339	0.0281565	0.0277381	0.0389904	0.0337467	0.0381958	0.0341445	0.0417371
0.152607	0.0479859	0.294355	0.198892	0.298998	0.159651	0.0312532	0.401353	0.160831	0.192164	0.163873	0.041889	0.0692457	0.282067	0.0527323	0.124423	0.751857	0.0867969	0.117055	0.067255	0.0888106	0.115972	0.339509	0.192135	0.215808	0.190166	0.32484	0.161875	0.27298	0.235726	0.244341	0.10214	0.142395	0.0518752	0.0712583	0.0908435	0.134456	0.105546	0.0897043	0.0876812	0.130693	0.11702	0.0886218	0.11143	0.0809111	0.166512	0.114676	0.121708	0.128997	0.167763
0.0884843	0.127188	0.086672	0.141711	0.117766	0.0365152	0.115379	0.0556641	0.0685782	0.151627	0.110664	0.0191694	0.153314	0.0424509	0.0365651	0.257369	0.0710644	0.100114	0.0200104	0.255396	0.157864	0.254472	0.0884552	0.0594038	0.134107	0.252704	0.0791995	0.10054	0.0896815	0.151247	0.07894	0.0527247	0.0796095	0.048389	0.0395402	0.0689082	0.0611169	0.0718586	0.0454329	0.0341411	0.0530473	0.0435661	0.0367846	0.0438289	0.0379123	0.0421089	0.0377431	0.0556191	0.0476551	0.0542075
0.047694	0.0148629	0.161783	0.0474081	0.121046	0.274613	0.0137627	0.185148	0.225771	0.0441298	0.0707692	0.434562	0.0241391	0.520966	0.205515	0.0423854	0.118375	0.101327	0.609823	0.0244672	0.0526307	0.0344534	0.183192	0.17569	0.0892418	0.0459165	0.180096	0.069528	0.137427	0.0692069	0.0884926	0.029475	0.0352845	0.0190684	0.0185772	0.0206821	0.0301375	0.0283945	0.0256344	0.0265247	0.024632	0.0278343	0.0221512	0.0243278	0.0167815	0.0259452	0.0308564	0.0315848	0.0258211	0.0441938
0.0608602	0.0343666	0.133229	0.214022	0.293021	0.0650861	0.047236	0.0817526	0.156924	0.353616	0.442471	0.0369023	0.167591	0.0782712	0.143419	0.513066	0.103978	0.671898	0.0830015	0.13724	1.09986	0.527654	0.151045	0.286705	0.576845	0.374038	0.243412	0.11661	0.348187	0.382485	0.12871	0.06024	0.0829536	0.0588435	0.0403514	0.0747669	0.0598637	0.0695081	0.0626864	0.0500364	0.0558127	0.0542342	0.0367262	0.0363647	0.0390069	0.0458566	0.0511567	0.0650679	0.0541821	0.0925791
0.0957768	0.0668422	0.159859	0.279468	0.278242	0.0669947	0.077626	0.100871	0.131618	0.406368	0.316939	0.0343566	0.235748	0.0735223	0.0695145	0.614612	0.135002	0.310345	0.0609449	0.199278	0.6077	0.697808	0.163892	0.18044	0.433806	0.525145	0.212144	0.13922	0.283522	0.420026	0.140567	0.086784	0.130327	0.0843838	0.0671715	0.117478	0.0946545	0.109082	0.102041	0.0712156	0.0996684	0.0803959	0.0575695	0.0626649	0.0609576	0.0765991	0.0681056	0.100724	0.0920675	0.136468
0.0325179	0.0146783	0.0823839	0.0468114	0.0784809	0.14376	0.0154002	0.0700282	0.15441	0.050232	0.0721698	0.373636	0.0254334	0.21882	0.275502	0.0392647	0.0656547	0.117312	0.558688	0.0242595	0.0583998	0.0360545	0.0751075	0.200245	0.0861152	0.0504353	0.0854604	0.0425863	0.101134	0.0643044	0.0512114	0.0307548	0.0391164	0.0171573	0.0240295	0.0220315	0.0339915	0.0291162	0.0264366	0.0334668	0.0306794	0.0328626	0.0314206	0.0310704	0.0242757	0.0339504	0.0384625	0.0376608	0.031302	0.0450465
0.168662	0.0587706	0.381177	0.282774	0.430478	0.222526	0.0430096	0.417886	0.223524	0.226628	0.224657	0.0616966	0.0855416	0.398456	0.085668	0.154399	0.496634	0.152373	0.192546	0.0684886	0.144551	0.1476	0.700193	0.302572	0.306987	0.214556	0.618325	0.307461	0.455767	0.326317	0.349466	0.063226	0.0902275	0.0357465	0.0415231	0.0596664	0.0786214	0.0720123	0.0535997	0.0495965	0.0657609	0.0660222	0.0443075	0.0548185	0.0408816	0.0866155	0.0724318	0.0730527	0.0786905	0.120884
0.0609235	0.0271313	0.170977	0.129497	0.300357	0.137842	0.0262154	0.13761	0.243424	0.191577	0.318412	0.0700182	0.0743801	0.211167	0.186018	0.169508	0.194594	0.363692	0.276685	0.0588363	0.237385	0.147408	0.220609	0.762431	0.516523	0.165097	0.334858	0.111767	0.518315	0.275162	0.170361	0.0526618	0.0649565	0.0312859	0.0309862	0.0476084	0.0497642	0.0489136	0.0485501	0.048212	0.0455633	0.045665	0.0360248	0.039944	0.0337672	0.0450382	0.0473803	0.0525382	0.0500615	0.0746108
0.13568	0.104331	0.194013	0.368462	0.334451	0.0635057	0.104849	0.119723	0.118704	0.437209	0.2796	0.0475464	0.217518	0.0760762	0.0560636	0.445595	0.193844	0.195691	0.0644987	0.199585	0.413749	0.522416	0.20499	0.164156	0.436679	0.800107	0.244736	0.171242	0.300722	0.521261	0.174561	0.110212	0.15923	0.0762211	0.0778188	0.126056	0.128711	0.13382	0.114548	0.0987319	0.124102	0.101102	0.0882971	0.0969524	0.0834959	0.106146	0.103462	0.128558	0.127396	0.190759
0.0875691	0.0420375	0.200863	0.262854	0.389814	0.0913782	0.044685	0.133906	0.167788	0.423689	0.41133	0.0466871	0.155572	0.115331	0.0750331	0.382245	0.213458	0.355821	0.102893	0.119726	0.547975	0.371755	0.230547	0.392962	0.95022	0.471105	0.359474	0.133217	0.562312	0.572244	0.210973	0.0817531	0.110229	0.0519807	0.0520568	0.0837575	0.0850354	0.0846666	0.0804567	0.0726758	0.0812275	0.078162	0.0587511	0.0627413	0.0548125	0.0787001	0.0724748	0.0911924	0.0885363	0.141978
0.106236	0.0370669	0.314853	0.232723	0.503869	0.214502	0.0280661	0.312704	0.284144	0.260786	0.362674	0.072628	0.0865121	0.389532	0.125731	0.185056	0.352448	0.278722	0.340512	0.0657773	0.219714	0.161979	0.487719	0.649293	0.515402	0.23197	0.83046	0.23099	0.817533	0.43287	0.366293	0.056722	0.0778958	0.0297765	0.036338	0.052956	0.0591857	0.0565302	0.0581479	0.055232	0.0557623	0.057969	0.0430969	0.0490868	0.0397048	0.0668321	0.0676004	0.0722378	0.0691887	0.11869
0.175222	0.0984258	0.318855	0.297613	0.390702	0.181528	0.0592222	0.3747	0.227703	0.198193	0.213251	0.051445	0.0886278	0.25037	0.0822272	0.15461	0.282267	0.166606	0.161793	0.0730066	0.153604	0.150549	0.577283	0.253996	0.248261	0.200768	0.707789	0.640374	0.389752	0.305157	0.453889	0.0499027	0.0687465	0.0313034	0.0380252	0.0515848	0.0569109	0.054568	0.0473679	0.0427769	0.0520402	0.0545975	0.0370084	0.0450877	0.0341312	0.0698947	0.0618297	0.0576204	0.0600214	0.0928772
0.0980072	0.0555343	0.209271	0.315986	0.395041	0.0897713	0.0605913	0.138427	0.150622	0.475677	0.363839	0.0464334	0.198753	0.124566	0.056774	0.395524	0.246123	0.214587	0.0941609	0.133131	0.430331	0.429637	0.256721	0.269493	0.671318	0.687479	0.376208	0.167539	0.543079	0.912264	0.244482	0.0933153	0.131265	0.0598326	0.0627368	0.104482	0.109436	0.109195	0.0996418	0.0920163	0.103181	0.0887459	0.067645	0.0738109	0.0621207	0.0793872	0.0807803	0.102376	0.113947	0.18693
0.0816614	0.037962	0.229815	0.237888	0.409444	0.149547	0.0333959	0.196387	0.207979	0.352951	0.386496	0.0474797	0.133967	0.208814	0.096665	0.267087	0.289161	0.276769	0.177008	0.0827802	0.332599	0.237353	0.346158	0.579437	0.825183	0.343827	0.57732	0.195401	1.01884	0.685296	0.370176	0.0639868	0.0906912	0.0329503	0.0418539	0.0606148	0.0709103	0.0636844	0.0668235	0.0665124	0.0673921	0.0687104	0.0468879	0.0535054	0.0433425	0.0618943	0.0663569	0.07428	0.0757643	0.137181
0.125164	0.0590692	0.25226	0.21556	0.339496	0.14868	0.0340303	0.357006	0.179297	0.207759	0.211935	0.0373946	0.0757668	0.251532	0.0615879	0.154034	0.313779	0.146275	0.136661	0.0642696	0.161186	0.138441	0.428353	0.246871	0.287619	0.210652	0.660917	0.364961	0.499432	0.358178	0.624506	0.0530793	0.075316	0.0330317	0.0402125	0.0529004	0.0673232	0.0608729	0.0512546	0.052342	0.0607236	0.0532136	0.0468998	0.0558898	0.044242	0.0824301	0.0783041	0.0683555	0.0699075	0.115189
0.0635918	0.0417122	0.0638194	0.0751447	0.0841555	0.0338277	0.0327605	0.0530781	0.0462506	0.0768288	0.0542583	0.0316894	0.0403016	0.0415529	0.036127	0.0542556	0.0933278	0.040905	0.0369295	0.0407661	0.0444363	0.0598244	0.0509886	0.0457332	0.0660672	0.0813823	0.0625346	0.0335366	0.059888	0.0839509	0.043286	0.426232	0.396143	0.128635	0.124735	0.138128	0.301821	0.219174	0.195623	0.18497	0.158893	0.164035	0.100892	0.101605	0.0770098	0.114544	0.112421	0.114322	0.138391	0.155922
0.0937817	0.0587567	0.100018	0.105844	0.114099	0.0416529	0.0398202	0.0761944	0.0580714	0.10773	0.0664528	0.0357072	0.0528597	0.0525384	0.0388208	0.078068	0.123842	0.0460151	0.0349319	0.0620425	0.0452703	0.0744174	0.0580446	0.0542645	0.0752412	0.118337	0.0710579	0.0425829	0.0610241	0.0815486	0.0628776	0.275974	0.406367	0.083712	0.102223	0.124437	0.364575	0.233972	0.153826	0.141686	0.171557	0.14035	0.151354	0.15194	0.137956	0.16179	0.169697	0.173042	0.152755	0.158644
0.078789	0.0549303	0.0881225	0.102745	0.117319	0.0364652	0.0449066	0.0626191	0.0606317	0.100975	0.076381	0.0264775	0.0736577	0.0412085	0.0374127	0.102792	0.112057	0.0662127	0.0355126	0.0667465	0.0893743	0.117034	0.0623597	0.0588325	0.0890125	0.121184	0.0774043	0.0473012	0.066771	0.0986017	0.0521362	0.552876	0.746964	0.28975	0.163042	0.285744	0.387554	0.44456	0.290109	0.228555	0.259049	0.212642	0.154256	0.160086	0.145639	0.152189	0.151538	0.213276	0.201609	0.204726
0.0380725	0.0324644	0.0461676	0.0529232	0.0590192	0.0223037	0.026389	0.036459	0.0315736	0.0502694	0.034364	0.0143848	0.0429623	0.0257435	0.019624	0.0598404	0.0506222	0.034186	0.0224538	0.0399604	0.0468122	0.0602031	0.0290055	0.0297581	0.0458698	0.0569739	0.0319384	0.0252918	0.0306257	0.0486053	0.0298427	0.218782	0.227287	0.204849	0.118575	0.185459	0.165299	0.212594	0.170792	0.129597	0.168027	0.126889	0.0752205	0.0703516	0.0673154	0.0817102	0.0672786	0.107903	0.123843	0.10727
0.0524364	0.0369401	0.0551175	0.0603876	0.0652465	0.0219609	0.0245754	0.0421092	0.0352029	0.0629917	0.043084	0.0216379	0.0408981	0.0267219	0.0220622	0.0627739	0.0694462	0.0344328	0.024691	0.0387934	0.0442778	0.0638287	0.0350291	0.0343838	0.0513342	0.0729879	0.0421378	0.0305861	0.0403587	0.0596036	0.0383129	0.144474	0.173859	0.115998	0.259794	0.154322	0.132358	0.154606	0.278135	0.225003	0.188439	0.232189	0.229743	0.209695	0.207724	0.182504	0.158007	0.237423	0.136644	0.155245
0.0451865	0.0347852	0.05188	0.0553283	0.0665771	0.0237779	0.0324355	0.0348748	0.039801	0.0597693	0.0468455	0.0167505	0.043527	0.0292696	0.0202193	0.0747291	0.0654522	0.0439425	0.0257721	0.0499702	0.0596684	0.0849548	0.038969	0.0349211	0.0563806	0.0794373	0.0418861	0.0294801	0.0420651	0.0589645	0.0352788	0.161504	0.185323	0.193585	0.115894	0.249072	0.125295	0.187103	0.164263	0.125466	0.174778	0.108587	0.0899245	0.0988947	0.0845483	0.08875	0.0787712	0.123631	0.131448	0.116376
0.0823926	0.0543734	0.0969773	0.109615	0.119366	0.0377206	0.0412958	0.0716513	0.059582	0.111998	0.0732679	0.0287791	0.0679003	0.0463681	0.0371334	0.0955652	0.124955	0.0527755	0.0378236	0.0638936	0.0667107	0.0999969	0.067323	0.0592162	0.0891407	0.128114	0.0798519	0.0458128	0.0732348	0.107425	0.0591896	0.469144	0.670991	0.215237	0.149015	0.250048	0.54431	0.468944	0.254525	0.218674	0.272449	0.224387	0.167568	0.158704	0.145491	0.164962	0.174003	0.213008	0.197063	0.222307
0.0910949	0.0518048	0.111984	0.115572	0.128311	0.0400568	0.0404573	0.0892705	0.0627122	0.12127	0.0722544	0.0340456	0.0591729	0.0612396	0.0363855	0.0887673	0.150454	0.0502619	0.0399227	0.0591408	0.0554856	0.0961219	0.0700603	0.0572416	0.0898327	0.129189	0.0792942	0.0459334	0.0688498	0.101447	0.0695831	0.308616	0.420437	0.108607	0.106271	0.148882	0.493805	0.299265	0.175034	0.157443	0.196673	0.170268	0.147533	0.13539	0.132921	0.158671	0.173854	0.174778	0.163663	0.189593
0.0590189	0.0396913	0.0606796	0.0689999	0.0850192	0.0288574	0.0340356	0.0476294	0.0463806	0.0786007	0.0598354	0.0210121	0.0602073	0.0357345	0.0223965	0.0800153	0.0844026	0.047069	0.0267337	0.0528181	0.0633296	0.0850923	0.0461848	0.0442209	0.0684188	0.0967407	0.0559715	0.0322445	0.0533827	0.0799147	0.0455282	0.189165	0.221125	0.170931	0.188143	0.255811	0.15341	0.187173	0.294562	0.21977	0.225519	0.183325	0.172179	0.172617	0.154574	0.148577	0.137028	0.225099	0.15509	0.172592
0.0783525	0.0555291	0.095611	0.11425	0.128782	0.0437724	0.04571	0.0698161	0.0691728	0.114359	0.0781659	0.0300162	0.0780806	0.0485056	0.0316508	0.111046	0.11978	0.0566014	0.037111	0.068606	0.0759673	0.115727	0.0623577	0.054166	0.0877964	0.134236	0.0803392	0.0445329	0.074042	0.107629	0.0650142	0.31426	0.386943	0.252358	0.194545	0.370238	0.311789	0.40176	0.286127	0.247086	0.367077	0.22177	0.1871	0.178612	0.161967	0.180901	0.169909	0.240759	0.258346	0.254079
0.0567566	0.0408957	0.0634138	0.0785765	0.0798391	0.0274576	0.0332766	0.0453242	0.0445433	0.0791744	0.0530429	0.0256259	0.0456789	0.0376419	0.0263053	0.0712573	0.0811848	0.0382683	0.0268748	0.0463419	0.0551892	0.0719264	0.0416	0.0415586	0.0617235	0.0883015	0.0561739	0.0345871	0.0518556	0.0751405	0.0428673	0.255188	0.308367	0.174877	0.276791	0.206698	0.199438	0.23282	0.466803	0.370597	0.273802	0.314751	0.298915	0.281107	0.26829	0.230131	0.221659	0.324828	0.169876	0.227533
0.0627114	0.0342227	0.0787124	0.0867091	0.102393	0.0358581	0.0297008	0.0594815	0.0530608	0.10017	0.0631623	0.03013	0.0496401	0.04739	0.0340389	0.0757745	0.102759	0.0443119	0.0389204	0.0398289	0.0682617	0.0828786	0.0562466	0.0549077	0.0865653	0.10804	0.0773139	0.0406297	0.0751665	0.116229	0.0542976	0.321182	0.352563	0.174081	0.261365	0.229078	0.270406	0.253808	0.457248	0.63284	0.301843	0.414543	0.350296	0.231838	0.257597	0.218847	0.306964	0.353329	0.214128	0.374297
0.0685799	0.0487866	0.0746044	0.0919363	0.100226	0.0297092	0.032884	0.0550573	0.0551387	0.0996958	0.0671509	0.0350899	0.0539493	0.0364893	0.0346001	0.0838535	0.114629	0.0434475	0.0311087	0.0530174	0.0511887	0.0742785	0.050528	0.0437305	0.067344	0.106303	0.0606068	0.0367576	0.0591751	0.0847738	0.0481798	0.216674	0.274042	0.159477	0.204947	0.240179	0.227378	0.223758	0.249371	0.205082	0.440654	0.282332	0.184567	0.169808	0.144576	0.264354	0.15934	0.20679	0.217571	0.20084
0.0715604	0.0414762	0.0857478	0.103816	0.110706	0.0308851	0.0305515	0.0682261	0.0558249	0.110543	0.0662786	0.0290229	0.0583183	0.0462223	0.0296747	0.0880009	0.120207	0.0476257	0.034129	0.0555383	0.0628552	0.0866707	0.0576999	0.0558454	0.0863	0.11233	0.072278	0.0420528	0.0709244	0.10204	0.0563355	0.285167	0.382198	0.157608	0.305433	0.223214	0.278142	0.255689	0.442551	0.431837	0.355058	0.545991	0.416495	0.38437	0.369231	0.350517	0.290773	0.394184	0.216114	0.276205
0.0457466	0.0247253	0.0512896	0.0518042	0.0559863	0.0252472	0.0169458	0.0550211	0.033164	0.0583264	0.0341273	0.0268109	0.0237775	0.0373547	0.0259682	0.0435291	0.0723146	0.0330362	0.0255017	0.0230732	0.0386589	0.0405181	0.0407846	0.0309971	0.0482947	0.0562624	0.0448239	0.0259506	0.0381981	0.0533246	0.0344694	0.10968	0.129684	0.0564709	0.15913	0.0845649	0.120277	0.11134	0.176693	0.218152	0.154951	0.240879	0.366801	0.237269	0.289452	0.24948	0.302796	0.2585	0.129769	0.215638
0.0576611	0.0354456	0.0654358	0.0775239	0.0850582	0.0266416	0.0262038	0.0516193	0.0451618	0.0865756	0.054904	0.0294865	0.037212	0.0363267	0.0283076	0.0717763	0.0855131	0.0410456	0.0298971	0.04436	0.0468964	0.0672638	0.0440317	0.0404389	0.0607052	0.0948372	0.0531641	0.0318729	0.0472368	0.0703949	0.0454615	0.136811	0.204012	0.0917295	0.222885	0.142207	0.158649	0.172349	0.311574	0.369797	0.184843	0.256143	0.869977	0.760099	1.24305	0.260184	0.50749	0.915017	0.172944	0.307768
0.0777449	0.0410198	0.0836388	0.0908537	0.10093	0.0295531	0.0267588	0.0834938	0.0569111	0.0924669	0.0552346	0.0297235	0.0414366	0.0429982	0.0329227	0.0672719	0.134034	0.0427261	0.0335242	0.0476062	0.0516884	0.0670806	0.0633614	0.0490323	0.0700885	0.0862431	0.0701329	0.0519205	0.0605378	0.0784384	0.0678591	0.146395	0.195777	0.0941581	0.245304	0.124232	0.153783	0.129479	0.254053	0.250652	0.242962	0.431551	0.319115	0.344387	0.259159	0.474075	0.239506	0.283167	0.15672	0.197472
0.0608556	0.0324265	0.0723939	0.0803514	0.0900441	0.0288583	0.0259657	0.0570992	0.0478292	0.0880736	0.0584453	0.0308566	0.0385714	0.0444974	0.0348187	0.0670726	0.0899332	0.0463478	0.03443	0.0409166	0.0579483	0.0662038	0.0490434	0.0503663	0.0745796	0.0939588	0.0678335	0.0362422	0.0610906	0.0874598	0.0568086	0.148787	0.19939	0.0876797	0.184984	0.125586	0.174234	0.17362	0.27886	0.392345	0.168735	0.24537	0.704109	0.492906	0.829403	0.224341	0.663214	0.864897	0.178409	0.418395
0.0892848	0.04482	0.0889532	0.094954	0.110441	0.028515	0.0268347	0.0917032	0.0590346	0.106554	0.0716296	0.035606	0.0472899	0.0465316	0.0369941	0.0712525	0.146269	0.0472098	0.0332428	0.0500626	0.0464936	0.0660994	0.0666415	0.0539905	0.0757625	0.101543	0.0738145	0.0481669	0.066647	0.0827119	0.0729552	0.13046	0.185366	0.0761835	0.164335	0.123191	0.14762	0.128335	0.188631	0.153124	0.274469	0.286381	0.199926	0.236352	0.160586	0.536256	0.180364	0.215395	0.181551	0.18501
0.0500665	0.0402169	0.0587395	0.0815513	0.0745986	0.0295922	0.0337456	0.04474	0.0429202	0.080874	0.0571268	0.0160415	0.0625864	0.0307787	0.0217355	0.0809112	0.0717388	0.0383256	0.0250192	0.0422055	0.066688	0.0889799	0.0505543	0.0368469	0.071335	0.0977022	0.0582116	0.0408184	0.0617511	0.098712	0.0421722	0.123616	0.136559	0.0972554	0.0877181	0.129395	0.124609	0.116003	0.119	0.106704	0.147154	0.111642	0.0768427	0.0700595	0.0602313	0.0968322	0.0774509	0.0953797	0.17847	0.136843
0.0772719	0.0429014	0.109069	0.113399	0.143978	0.0440055	0.0306314	0.0911927	0.0778334	0.143238	0.094336	0.0347215	0.0547113	0.0722174	0.0340459	0.105407	0.176652	0.057747	0.0532876	0.0579727	0.0712531	0.100365	0.0938519	0.0814479	0.117846	0.154442	0.117429	0.0566405	0.112413	0.130782	0.0920926	0.152813	0.226024	0.100813	0.160823	0.176733	0.180549	0.17592	0.221641	0.196508	0.213392	0.200993	0.268324	0.338673	0.295014	0.309062	0.268895	0.458809	0.213804	0.337164
0.0743189	0.035876	0.115096	0.126286	0.156573	0.0455822	0.0283888	0.0982329	0.0670992	0.159019	0.100609	0.0410416	0.0608526	0.0744028	0.0375816	0.114191	0.170779	0.0653461	0.0612391	0.0519223	0.107435	0.125015	0.103522	0.0868559	0.142409	0.173945	0.152677	0.0612699	0.145244	0.180178	0.097392	0.185124	0.232137	0.100699	0.14729	0.163562	0.198374	0.194977	0.23165	0.294244	0.204056	0.213884	0.299688	0.21675	0.243311	0.217851	0.356619	0.37838	0.237334	0.711618
0.0863225	0.0464668	0.109671	0.11238	0.14063	0.0432335	0.0270189	0.11219	0.0744579	0.133301	0.0930814	0.0389746	0.0587213	0.0671259	0.0385088	0.0961089	0.190898	0.0522493	0.0468489	0.0577627	0.0593041	0.0820243	0.0880173	0.0799347	0.119075	0.131106	0.110313	0.0553616	0.114202	0.117601	0.102974	0.132905	0.19789	0.0766125	0.122224	0.131159	0.16762	0.132261	0.161643	0.129415	0.231258	0.190853	0.167532	0.231243	0.162616	0.35731	0.160958	0.231123	0.192664	0.187278
0.0687281	0.0408593	0.0650926	0.0862772	0.0923828	0.0344666	0.0267386	0.050426	0.0502737	0.0917165	0.0588818	0.0352505	0.0476723	0.0341673	0.0345596	0.0752979	0.0944636	0.0382684	0.0310233	0.0436335	0.0529592	0.0790605	0.0476258	0.0374712	0.0700317	0.100878	0.060554	0.0328983	0.0549756	0.0846333	0.0470254	0.172233	0.20809	0.118427	0.162405	0.182499	0.181523	0.169616	0.190614	0.189262	0.268854	0.196027	0.214036	0.167501	0.163343	0.210479	0.184243	0.205217	0.354229	0.267954
0.0703968	0.0377543	0.087021	0.0919294	0.114255	0.0388012	0.0227635	0.0797295	0.0615672	0.112644	0.0813046	0.0330207	0.0469407	0.0576569	0.0313567	0.0894119	0.147545	0.0473683	0.0418696	0.0500747	0.0545127	0.0790405	0.0769041	0.0626176	0.0969833	0.122297	0.0911728	0.0427144	0.0876664	0.0994567	0.0755974	0.114739	0.172737	0.075663	0.106638	0.131636	0.142368	0.129497	0.135772	0.117423	0.16975	0.133249	0.172625	0.218336	0.187711	0.235232	0.171225	0.277805	0.188814	0.241223
0.0713618	0.0344769	0.0886597	0.0928257	0.104525	0.0345606	0.0215942	0.079295	0.0572608	0.103284	0.0690691	0.0346069	0.04416	0.0560087	0.0321197	0.0769658	0.135609	0.0468644	0.0384475	0.0453614	0.0456955	0.0677692	0.0704617	0.0582555	0.0865489	0.109396	0.0773054	0.0400197	0.0779214	0.0856823	0.0770888	0.104245	0.162566	0.0661654	0.102654	0.113106	0.139146	0.123016	0.126832	0.107746	0.180129	0.139107	0.180601	0.196112	0.171209	0.264108	0.175334	0.240725	0.212122	0.234244
0.0840546	0.0456262	0.120469	0.125815	0.15162	0.0471602	0.0312377	0.109142	0.0824886	0.150543	0.101578	0.0377699	0.0579635	0.0729216	0.0365882	0.105277	0.201644	0.0552496	0.0489763	0.0615633	0.0620017	0.0945066	0.100186	0.0906906	0.133471	0.150693	0.128839	0.0625686	0.137021	0.149545	0.126354	0.121918	0.178641	0.0720291	0.107489	0.141048	0.167375	0.138387	0.135513	0.128188	0.213589	0.162749	0.15746	0.189876	0.150111	0.259629	0.16545	0.224264	0.222102	0.240572
0.0728854	0.0441256	0.099348	0.0971649	0.120756	0.041694	0.0276723	0.0927475	0.0708722	0.122124	0.0804954	0.0306756	0.0474662	0.0579904	0.030338	0.0906918	0.15756	0.0443946	0.0379002	0.0513192	0.0564436	0.080296	0.0872497	0.0658728	0.10272	0.126803	0.0972818	0.059546	0.111099	0.137701	0.107102	0.115598	0.15678	0.0753052	0.106362	0.125185	0.152714	0.12124	0.123445	0.117133	0.212438	0.162707	0.108755	0.128112	0.105244	0.223699	0.116607	0.158821	0.182747	0.167804
0.0657378	0.0388738	0.0852194	0.0878537	0.107385	0.0342318	0.026384	0.0732978	0.0612165	0.105617	0.0760831	0.0313413	0.0434116	0.0507703	0.0330674	0.083527	0.136933	0.0502011	0.0396782	0.0475144	0.0536632	0.07912	0.0731125	0.0611895	0.0914954	0.120415	0.0847129	0.046449	0.0805505	0.0956642	0.0719918	0.110035	0.174335	0.080275	0.09891	0.150304	0.143853	0.141253	0.138974	0.11564	0.173203	0.126229	0.16651	0.191724	0.186401	0.208478	0.164167	0.273005	0.212925	0.236283
0.0622062	0.0423511	0.0701142	0.0873306	0.087959	0.0324455	0.0337593	0.0571984	0.0462247	0.0899935	0.0561895	0.0342002	0.041517	0.0359763	0.0350808	0.0694015	0.0952611	0.0327339	0.0267915	0.0425866	0.0392818	0.0631215	0.0485339	0.0350463	0.0609881	0.101898	0.0575264	0.0324459	0.0525347	0.0780836	0.0522507	0.111344	0.157703	0.0820794	0.100027	0.151043	0.148534	0.148448	0.129126	0.120622	0.194385	0.122665	0.172202	0.162116	0.16758	0.180292	0.168571	0.198351	0.288147	0.217279
0.0616476	0.0337107	0.0604444	0.0627657	0.0753576	0.0280651	0.0184807	0.0676538	0.0447639	0.0731323	0.0491214	0.0293073	0.0301171	0.0327374	0.0263409	0.0532857	0.102004	0.0306592	0.0242686	0.0308394	0.0329357	0.0432467	0.0490555	0.0343772	0.0592024	0.0731609	0.0545078	0.0338966	0.0566275	0.0563172	0.0626572	0.0757115	0.106018	0.0536901	0.0885965	0.0776298	0.0974134	0.0750867	0.0836408	0.0773686	0.161693	0.125094	0.119011	0.0981964	0.091579	0.218109	0.115317	0.110097	0.159876	0.134293
0.0664802	0.0390542	0.0987244	0.103893	0.126489	0.0454426	0.0277571	0.0849163	0.0676258	0.12105	0.0868221	0.0318434	0.0572047	0.0633587	0.0344861	0.0892803	0.151334	0.0530169	0.0460423	0.0541986	0.0659511	0.0926835	0.0931459	0.0764201	0.116826	0.136666	0.105871	0.0612052	0.116068	0.141504	0.0936581	0.117043	0.165835	0.0888698	0.0936639	0.163788	0.13747	0.128679	0.12475	0.111552	0.168465	0.124865	0.132228	0.164408	0.14294	0.172905	0.125627	0.186342	0.215988	0.188722
0.0482167	0.0331803	0.0603881	0.0703683	0.0778509	0.0291688	0.0250424	0.0494973	0.0468859	0.0773992	0.0543478	0.028536	0.0368257	0.0363962	0.0293111	0.0694347	0.0808041	0.0438647	0.0322461	0.0428572	0.0468901	0.0702008	0.0478214	0.0383341	0.0630412	0.0906205	0.0557527	0.0316515	0.0523563	0.0768289	0.0496084	0.111812	0.153313	0.0801112	0.0946731	0.151936	0.137544	0.136611	0.123573	0.147959	0.149294	0.113477	0.169856	0.132541	0.154192	0.133118	0.167867	0.227393	0.230179	0.285131
0.0473934	0.026952	0.0663755	0.0656225	0.0832341	0.0353245	0.0262876	0.0515429	0.0493272	0.0869038	0.0637345	0.0242627	0.0445354	0.0472409	0.0260088	0.080701	0.0880922	0.0568996	0.0403613	0.0457023	0.0731969	0.0894218	0.0600569	0.053552	0.0852584	0.100992	0.0699644	0.0366608	0.0698489	0.095365	0.0510315	0.128915	0.177357	0.11583	0.110339	0.218738	0.139627	0.156826	0.163801	0.158661	0.171321	0.121126	0.145032	0.12784	0.149312	0.122622	0.14278	0.26741	0.209203	0.249388
0.0618067	0.0338622	0.0869629	0.0834706	0.116144	0.0448879	0.0267427	0.0751502	0.0685522	0.114462	0.0801316	0.0274719	0.0500581	0.0613983	0.0284914	0.092623	0.13651	0.0465523	0.0445374	0.0583466	0.056452	0.0880357	0.0829643	0.0713687	0.0999157	0.121776	0.0903655	0.0520083	0.0990634	0.124224	0.079737	0.117899	0.165131	0.0993231	0.101042	0.176186	0.151496	0.136627	0.142451	0.131613	0.187064	0.133477	0.13198	0.14966	0.134783	0.154587	0.122012	0.195651	0.202773	0.192991
0.046061	0.0249909	0.0421803	0.0573456	0.0639036	0.0257953	0.0151456	0.0454172	0.0322309	0.0612368	0.0441064	0.0214812	0.0278772	0.0302542	0.0214993	0.0484919	0.0699457	0.0310677	0.0250984	0.0244199	0.0486949	0.0541542	0.0447511	0.0379619	0.0569634	0.0624327	0.0522178	0.0394466	0.053885	0.072309	0.0495699	0.0922917	0.0979161	0.0519857	0.0767727	0.0783024	0.0966703	0.0810989	0.080334	0.125187	0.132367	0.137053	0.100312	0.067227	0.0683903	0.138262	0.0923388	0.0897399	0.132156	0.141338
0.044862	0.0262927	0.0644506	0.0613797	0.0747633	0.0462434	0.0174001	0.0730773	0.0548737	0.0825036	0.0657884	0.0259373	0.0381431	0.0543997	0.0370597	0.0673183	0.108412	0.0448894	0.0463478	0.0361152	0.053301	0.061537	0.0760922	0.0818773	0.0921692	0.085613	0.0780412	0.0635867	0.105693	0.114121	0.0950041	0.0747408	0.0875875	0.0497936	0.0553655	0.0747798	0.0764758	0.0639765	0.0762896	0.0686263	0.114482	0.0988707	0.057406	0.076134	0.0577138	0.113334	0.0524028	0.0814066	0.0900492	0.0786777
0.0477908	0.0334683	0.0638207	0.0704148	0.0824607	0.0278769	0.0201259	0.0545318	0.0443927	0.0850997	0.0557222	0.0308395	0.0354203	0.035398	0.0297096	0.0626339	0.0979509	0.0341028	0.0315405	0.0390261	0.0407259	0.0601269	0.0482797	0.0347507	0.0627714	0.0932282	0.0580851	0.0320177	0.0490172	0.074805	0.0498716	0.0863254	0.126005	0.0730393	0.0763136	0.12992	0.108822	0.1043	0.0993226	0.0949918	0.146797	0.0992756	0.145967	0.142369	0.142337	0.14913	0.135056	0.173542	0.197373	0.176161
0.066965	0.0394927	0.074014	0.0752528	0.0897265	0.0328771	0.0252833	0.0631577	0.0508104	0.0874721	0.0536881	0.0375837	0.0395936	0.0451191	0.0346675	0.0702264	0.108186	0.03443	0.0343606	0.0464477	0.0402299	0.068665	0.0521555	0.0390931	0.063061	0.102076	0.0603096	0.0320244	0.0593795	0.0832318	0.057918	0.1083	0.162222	0.074912	0.104727	0.137072	0.144681	0.131297	0.113374	0.122994	0.174969	0.121411	0.183123	0.165345	0.166967	0.184089	0.172611	0.214217	0.2512	0.236051
0.0503858	0.0271182	0.0903336	0.0745213	0.106466	0.0510962	0.0209526	0.0726291	0.0730374	0.0978262	0.0763206	0.0345625	0.0423532	0.0680561	0.041184	0.0807976	0.13081	0.0530323	0.0530425	0.0441847	0.0624218	0.0789066	0.0776107	0.0788691	0.112812	0.103459	0.0928147	0.0538897	0.109698	0.112836	0.0744568	0.0930923	0.142322	0.0776772	0.0835588	0.150871	0.106548	0.104627	0.117204	0.101466	0.140465	0.104386	0.109051	0.139591	0.123034	0.133303	0.109445	0.193772	0.157209	0.161244
0.199745	0.0822133	0.273552	0.131332	0.176642	0.167114	0.0410408	0.374978	0.129083	0.104909	0.104371	0.040755	0.0628193	0.160621	0.0639055	0.0898312	0.256419	0.0775365	0.0673702	0.057841	0.0728294	0.0890544	0.20793	0.100696	0.113194	0.116098	0.187767	0.197029	0.129132	0.123309	0.205029	0.0741825	0.10233	0.0388899	0.0515975	0.0568008	0.0902775	0.0765659	0.0564037	0.0560685	0.0670936	0.0733491	0.0506587	0.0587894	0.0489928	0.104787	0.0660521	0.0719365	0.068597	0.0791024
0.0757926	0.0450444	0.0687299	0.0507427	0.0587645	0.0379646	0.0224346	0.130902	0.0402051	0.0461977	0.0392889	0.0218655	0.0306415	0.0455768	0.0264546	0.0430921	0.109896	0.0363745	0.027598	0.0338229	0.0380292	0.0432158	0.0781476	0.0350515	0.0404375	0.0467688	0.0585446	0.126417	0.043233	0.0514001	0.095173	0.0484971	0.0594027	0.0297479	0.0416137	0.0376517	0.0572043	0.0452777	0.0467897	0.0451872	0.0572199	0.0718832	0.0315585	0.0290636	0.0255221	0.0916646	0.038334	0.0365511	0.0455181	0.0492059
0.096739	0.0577132	0.113171	0.103242	0.106472	0.0543082	0.0445701	0.105171	0.0578135	0.093686	0.0618411	0.0269623	0.0556608	0.0543131	0.0305695	0.0830883	0.181907	0.0409816	0.0297232	0.0664407	0.0500503	0.0816622	0.0952933	0.0505736	0.0742888	0.114627	0.0779181	0.0998995	0.0751658	0.102336	0.0772064	0.0905915	0.122539	0.0474388	0.0551814	0.0720069	0.127996	0.0942038	0.0759653	0.0729365	0.0986635	0.0975643	0.0723762	0.07799	0.0690773	0.108313	0.085879	0.0905239	0.0822355	0.107261
0.0893607	0.154934	0.0628159	0.0994914	0.0699116	0.0280972	0.0784948	0.056659	0.0456697	0.056515	0.0445833	0.0145259	0.0570566	0.0265427	0.0302094	0.0692949	0.0596914	0.0392849	0.0200484	0.0952083	0.0396804	0.0795521	0.108409	0.0407706	0.0509235	0.105545	0.0587768	0.265167	0.0465717	0.0616611	0.113377	0.0281138	0.0369693	0.02258	0.0218113	0.0265954	0.0331041	0.0333333	0.0263993	0.0252545	0.0283822	0.0316129	0.0244731	0.0275015	0.0243958	0.0361342	0.0243619	0.0315643	0.0261307	0.0340823
0.133796	0.0729649	0.157775	0.127334	0.137504	0.0886751	0.0376461	0.2458	0.0962232	0.0758388	0.0717608	0.038549	0.0492906	0.102087	0.0400914	0.0685993	0.131237	0.0724921	0.0656939	0.0541585	0.0661348	0.0721862	0.22632	0.0694089	0.080758	0.084756	0.225367	0.375806	0.100634	0.0925329	0.273614	0.0375338	0.0528228	0.02533	0.0348985	0.0430947	0.0466415	0.0457941	0.0356716	0.0340159	0.0382815	0.0425738	0.033118	0.0349264	0.0311872	0.0665343	0.0485	0.0422424	0.0435456	0.0559436
0.0793096	0.0381128	0.0786688	0.0833496	0.0890913	0.0316175	0.0217575	0.119464	0.0497239	0.0820342	0.0498202	0.022716	0.04093	0.0417379	0.0272499	0.0567982	0.125139	0.0321481	0.0292153	0.0385085	0.0376079	0.0557964	0.0678091	0.0405852	0.0593378	0.0707522	0.0704024	0.0714622	0.0586208	0.0670735	0.0872604	0.093648	0.12586	0.0597485	0.122165	0.0819449	0.108982	0.0853052	0.115646	0.109677	0.175558	0.211752	0.104313	0.117973	0.0806709	0.35676	0.113377	0.111397	0.115218	0.115569
0.0657188	0.0441647	0.124826	0.146961	0.182467	0.0747099	0.0322931	0.133627	0.105187	0.149437	0.147323	0.0314056	0.0800195	0.0945749	0.0723704	0.135514	0.135145	0.135327	0.0868267	0.0578727	0.158929	0.12689	0.237797	0.199759	0.274334	0.177036	0.295342	0.256067	0.367139	0.362904	0.377062	0.0427396	0.0529999	0.0249852	0.0289091	0.0366423	0.050849	0.0457451	0.0401999	0.0418935	0.0397139	0.0414517	0.0364082	0.0329687	0.0306107	0.0429833	0.045964	0.0443729	0.0363414	0.0633571
0.0624156	0.0302664	0.0782496	0.0673011	0.0813014	0.0323886	0.0191142	0.158539	0.0476628	0.0643124	0.0465048	0.0172502	0.0370844	0.0500047	0.0232216	0.0487358	0.124975	0.0405069	0.0265658	0.0353429	0.0413578	0.0506067	0.0949825	0.0437052	0.0597106	0.0607651	0.0981001	0.114582	0.0649666	0.0610883	0.139648	0.0562844	0.0781937	0.0372698	0.0653289	0.0509033	0.0728656	0.0645856	0.0606535	0.0579928	0.0836373	0.107056	0.0656261	0.0624242	0.0481737	0.191082	0.0696624	0.0650929	0.0662093	0.0705068
0.0896405	0.044921	0.0903583	0.0868921	0.0987987	0.0302947	0.0195499	0.122731	0.0513358	0.0860844	0.0620798	0.0266973	0.0446599	0.0483985	0.0296582	0.0600713	0.130469	0.0389026	0.0282553	0.0433356	0.0408945	0.0565718	0.0700135	0.0454887	0.0669893	0.0804586	0.079007	0.0608284	0.0651068	0.0685474	0.0976147	0.089634	0.126357	0.0501438	0.117255	0.0789274	0.110212	0.0863105	0.108096	0.0906115	0.178987	0.181375	0.110247	0.123051	0.0867593	0.347001	0.10657	0.112554	0.126144	0.109035
0.0825013	0.0358388	0.114809	0.0840152	0.112394	0.0650626	0.0181344	0.192854	0.0715607	0.0674244	0.0572663	0.0251698	0.0379606	0.0886926	0.0308428	0.0511827	0.120133	0.0510946	0.0524184	0.0363155	0.0490517	0.0458348	0.185104	0.0688097	0.0851524	0.0640073	0.189022	0.196677	0.124771	0.0918258	0.230546	0.0277874	0.0397344	0.0214273	0.0265427	0.0320738	0.0359639	0.0335806	0.0290274	0.0246843	0.0353552	0.0338406	0.0291241	0.0290223	0.0264792	0.0621361	0.0384503	0.0334505	0.0367638	0.0458108
0.0575543	0.0291182	0.0664611	0.0593403	0.0670215	0.0356038	0.0232029	0.12023	0.0466412	0.0466831	0.0387338	0.0155834	0.0289301	0.050095	0.0211044	0.040824	0.0842615	0.0391457	0.0264131	0.0315882	0.040774	0.0434252	0.0929054	0.0315648	0.0478035	0.046984	0.1019	0.129858	0.0573314	0.0555297	0.139385	0.0414732	0.0551048	0.0334241	0.0419316	0.042611	0.0492675	0.0471651	0.0423058	0.0413692	0.0492227	0.067706	0.0401281	0.0355223	0.0311459	0.104701	0.0512744	0.0442026	0.0486644	0.052593
0.101242	0.0503454	0.136567	0.141516	0.168427	0.071417	0.0238484	0.249259	0.0954363	0.11431	0.102421	0.0259186	0.0517951	0.104016	0.0442421	0.0795828	0.169468	0.0824746	0.0700028	0.0445487	0.0811656	0.0740659	0.289191	0.114485	0.133699	0.103192	0.312628	0.365037	0.203271	0.165238	0.440094	0.0386405	0.0524495	0.0236385	0.0337499	0.0395346	0.0503723	0.0418771	0.040914	0.0386814	0.0435253	0.0537618	0.0335725	0.0383958	0.0311233	0.0832078	0.0493735	0.0466132	0.0487148	0.0619036
0.0763046	0.0397955	0.0940274	0.0873054	0.0998844	0.0365383	0.0227503	0.113489	0.0577747	0.0970372	0.0613926	0.0316772	0.0431423	0.0595461	0.0280348	0.061677	0.166416	0.031725	0.0325411	0.0440654	0.0390289	0.0561148	0.0827809	0.054687	0.0726992	0.0920337	0.0885068	0.0526462	0.0896787	0.0878189	0.10611	0.0794201	0.117342	0.0551613	0.0940904	0.0795499	0.115632	0.0904483	0.0942087	0.0880187	0.173129	0.144149	0.107699	0.121119	0.0962431	0.2741	0.106266	0.126769	0.147062	0.138036
0.0969955	0.0358453	0.14657	0.122122	0.168526	0.0695238	0.0231682	0.23812	0.0859717	0.103075	0.0856415	0.0248144	0.046037	0.108529	0.0293797	0.0771734	0.205101	0.0608764	0.0540466	0.0418975	0.0704156	0.0697972	0.200631	0.0808662	0.106241	0.0957422	0.244246	0.196561	0.155552	0.132531	0.254815	0.0590006	0.0791096	0.0359019	0.0577878	0.058461	0.0674951	0.065586	0.0615935	0.0629816	0.0729164	0.0853624	0.0575291	0.060325	0.0493046	0.146507	0.0830111	0.0720011	0.0793195	0.105984
0.0426863	0.0405146	0.0512397	0.0627859	0.065029	0.0406622	0.0260359	0.0586688	0.0548385	0.0538012	0.0607087	0.0317545	0.0430341	0.0386457	0.0490183	0.0640673	0.0573747	0.0625586	0.0389344	0.0458787	0.0661282	0.0649946	0.0908203	0.0817475	0.0985185	0.0877058	0.0932807	0.177575	0.103028	0.119973	0.153175	0.0276722	0.0362366	0.0195519	0.0256726	0.0296843	0.027179	0.0293434	0.030479	0.027716	0.0323541	0.0298143	0.0284708	0.02631	0.026151	0.0371581	0.0283504	0.0361147	0.0283254	0.0305015
0.119557	0.0460078	0.20069	0.156812	0.228599	0.0949729	0.0294214	0.314813	0.114798	0.156772	0.136203	0.0289261	0.0630521	0.157933	0.0398996	0.109908	0.27792	0.0869373	0.0900643	0.0545774	0.0973322	0.0971941	0.311086	0.141001	0.191316	0.146574	0.368308	0.240282	0.292155	0.229113	0.400924	0.0608068	0.0862947	0.0353859	0.0539033	0.0629551	0.0752767	0.0684341	0.0659689	0.0633187	0.081945	0.0896001	0.05732	0.0658173	0.0493887	0.14844	0.0834142	0.0775103	0.0882216	0.125194
0.0635085	0.058409	0.0754845	0.103496	0.092241	0.0446189	0.0380076	0.0813814	0.0589651	0.0960139	0.0811945	0.0254816	0.0721454	0.0498305	0.0390618	0.100274	0.105715	0.0655006	0.0437809	0.0599239	0.0786913	0.106729	0.130157	0.0916658	0.125363	0.128291	0.103483	0.184964	0.126207	0.176828	0.144305	0.061975	0.0728611	0.0414131	0.0424515	0.0554139	0.0709764	0.0549592	0.0562931	0.0475441	0.0693885	0.0652998	0.043445	0.0452669	0.0341811	0.0658716	0.0425321	0.0494624	0.0633097	0.0601123
0.0567405	0.041651	0.090767	0.0864572	0.104923	0.0614498	0.0192818	0.149144	0.0677398	0.0853174	0.0820393	0.0242319	0.044324	0.0708985	0.0507291	0.0716265	0.119598	0.0693988	0.0613809	0.0340851	0.0661763	0.0643614	0.174554	0.112406	0.124092	0.0884223	0.181628	0.233159	0.184271	0.155531	0.303028	0.0367551	0.0482654	0.0252289	0.0320204	0.0344672	0.0385608	0.0337704	0.0391339	0.0349131	0.0443687	0.0498219	0.0279989	0.0335827	0.0276932	0.0663547	0.0343811	0.0391462	0.0402117	0.0452889
0.0741504	0.0383021	0.0989211	0.099329	0.119618	0.0480078	0.0270424	0.119806	0.0714186	0.122912	0.09345	0.0284532	0.0494264	0.0600775	0.0352189	0.0876291	0.162016	0.0567296	0.04899	0.0446504	0.0648183	0.0815924	0.113691	0.0987782	0.12335	0.114187	0.126616	0.090699	0.14706	0.158578	0.165888	0.082061	0.10434	0.0545334	0.0726156	0.0842805	0.10169	0.0765571	0.0948464	0.0859452	0.152707	0.132667	0.0707307	0.0839847	0.0660182	0.177025	0.0741171	0.09825	0.121574	0.106308
0.0733584	0.0317697	0.099685	0.11183	0.12604	0.03821	0.0268774	0.109352	0.0635367	0.0951549	0.0731111	0.0200163	0.0479011	0.0690171	0.0250017	0.0728575	0.141636	0.0589531	0.0426936	0.0318188	0.0822079	0.0829215	0.132364	0.0593643	0.0942645	0.104121	0.151689	0.109054	0.107648	0.127164	0.111911	0.0916884	0.113434	0.0524224	0.0712356	0.0716489	0.107751	0.0920056	0.086014	0.110935	0.116964	0.13237	0.0831626	0.0657533	0.0557477	0.131818	0.129233	0.089763	0.116185	0.208628
0.080247	0.0471284	0.0755992	0.101932	0.0892956	0.0290876	0.0230311	0.114441	0.0466862	0.0732626	0.0515637	0.0195289	0.0362405	0.0338186	0.0193542	0.0564846	0.0949307	0.0415545	0.0286703	0.0344128	0.0503906	0.0569141	0.106751	0.0369329	0.0628979	0.0702286	0.108386	0.139314	0.0669027	0.0795567	0.12917	0.0593958	0.0776532	0.0394527	0.0555653	0.0496684	0.0687976	0.0601802	0.0520673	0.0577969	0.078789	0.0856297	0.0584087	0.046744	0.0471099	0.119023	0.0812004	0.0635733	0.0799693	0.0945297
0.0531791	0.0280454	0.0502627	0.0688078	0.0667776	0.0301589	0.019462	0.0703557	0.0392994	0.0587356	0.0460672	0.0217729	0.032587	0.0278986	0.0220418	0.0432907	0.0696281	0.0333551	0.0248728	0.0265546	0.0443274	0.0482542	0.0615161	0.0356087	0.0570963	0.0605373	0.0720097	0.0672009	0.0592532	0.065568	0.0798448	0.0564207	0.0704409	0.0411673	0.0559552	0.0543493	0.0665378	0.0625909	0.0558171	0.0686175	0.081936	0.0942855	0.0610176	0.0540133	0.0498479	0.116381	0.0694741	0.0638637	0.0872456	0.0862061
0.0671589	0.0290235	0.0573302	0.0627564	0.0560989	0.0230762	0.0190219	0.0941221	0.0334447	0.0458427	0.0345639	0.0197324	0.0297335	0.0293507	0.0241801	0.0404381	0.0716487	0.0375352	0.0194986	0.0287807	0.0432972	0.0440064	0.0640151	0.027698	0.0405257	0.0432697	0.0651826	0.0890444	0.0381218	0.0474797	0.0662542	0.0809326	0.092292	0.048805	0.0988382	0.0547531	0.0987879	0.076435	0.0710844	0.0933218	0.0873853	0.137288	0.0849688	0.0565686	0.0525534	0.141051	0.110193	0.0636124	0.0761226	0.105551
0.0677609	0.0380755	0.0785214	0.0707963	0.0790695	0.0392895	0.0261987	0.0755137	0.0448785	0.0698067	0.0446742	0.0223085	0.0424656	0.0378929	0.0266893	0.0630825	0.112953	0.0338087	0.0226056	0.0402632	0.040853	0.0587253	0.0573472	0.0342167	0.0539808	0.0756453	0.0512578	0.0629564	0.0511739	0.0685555	0.0559765	0.0859051	0.123835	0.0465383	0.0493655	0.0588421	0.145736	0.0975183	0.0699342	0.0689099	0.0917828	0.0990639	0.0621845	0.0621272	0.0549682	0.0932066	0.0683869	0.0749442	0.0781797	0.0873188
0.0915777	0.0446692	0.116402	0.116481	0.120115	0.0472912	0.0392451	0.0968435	0.0624846	0.119796	0.0678072	0.0282195	0.0681892	0.0596104	0.0318522	0.0981875	0.160988	0.0487621	0.0356298	0.0645193	0.0626163	0.0928824	0.0765702	0.0575211	0.0850266	0.125294	0.0838342	0.0656304	0.0750129	0.109226	0.0763615	0.163003	0.230618	0.0637127	0.0782021	0.0987662	0.273037	0.162577	0.115559	0.117416	0.14117	0.138225	0.110328	0.109975	0.0947452	0.129055	0.130154	0.12475	0.123297	0.138691
0.0586939	0.0334423	0.0685321	0.0823264	0.081934	0.0277442	0.030327	0.0560204	0.0440864	0.0795049	0.0493494	0.024023	0.0500259	0.036552	0.0276445	0.0715522	0.106355	0.0479464	0.0286407	0.042038	0.0603596	0.0735855	0.0610684	0.0402586	0.0635138	0.0881845	0.0561704	0.0521238	0.0562519	0.0894822	0.0553827	0.143914	0.175776	0.070213	0.0716574	0.0950394	0.211151	0.13945	0.104294	0.113042	0.119649	0.118654	0.0766939	0.0682183	0.060362	0.0929562	0.0965587	0.0916945	0.104982	0.12378
0.0599628	0.034183	0.0702986	0.0755584	0.0890906	0.0354691	0.0263849	0.0661729	0.0501236	0.0810836	0.0565254	0.0265777	0.0476495	0.041346	0.0315733	0.0681172	0.111566	0.0474406	0.0352841	0.0378625	0.0647723	0.0735327	0.055973	0.0515758	0.0756927	0.0839741	0.063911	0.0430472	0.0656509	0.107361	0.0500372	0.280226	0.298016	0.167131	0.151368	0.197272	0.343657	0.24747	0.238931	0.267259	0.321555	0.301888	0.131224	0.0993223	0.0893613	0.166782	0.140177	0.140738	0.176416	0.219611
0.0613609	0.0347703	0.0722897	0.086491	0.0955654	0.0321432	0.0257416	0.0697756	0.0544869	0.090755	0.0628184	0.0248114	0.0532912	0.0415725	0.0295826	0.0786882	0.109529	0.0486697	0.0339642	0.0433199	0.0666644	0.081033	0.0553304	0.0527553	0.0801534	0.0910973	0.0682199	0.0525763	0.0666436	0.103854	0.0512758	0.243751	0.2667	0.150392	0.198581	0.179731	0.242984	0.189812	0.27957	0.304143	0.353431	0.480641	0.159053	0.13039	0.10257	0.266082	0.147604	0.155534	0.155839	0.201581
0.0476493	0.0310417	0.0482817	0.0627162	0.062339	0.0278301	0.0246397	0.069522	0.038723	0.0628572	0.0414993	0.0260342	0.0354657	0.0290316	0.0279272	0.0552464	0.0748986	0.0366165	0.0281486	0.0305589	0.051336	0.056007	0.0467493	0.0399925	0.0564562	0.0598122	0.0475433	0.0638742	0.0473939	0.0691833	0.0579268	0.108857	0.107347	0.0710173	0.0982882	0.075973	0.113154	0.0830813	0.111182	0.142494	0.149761	0.201553	0.0638976	0.0490736	0.0402232	0.169517	0.0700244	0.064311	0.0760701	0.104226
0.0236111	0.0205549	0.026873	0.0310509	0.0378508	0.0206396	0.0192919	0.0284777	0.0271927	0.0336917	0.0265858	0.0208438	0.0202999	0.0229018	0.022817	0.0291399	0.0364767	0.0258464	0.0216672	0.0227535	0.0351913	0.029116	0.0257306	0.0306279	0.0328357	0.0332139	0.0290071	0.0425958	0.0315929	0.0484655	0.028485	0.0617842	0.0541964	0.0372102	0.0341368	0.0310148	0.0685106	0.0386412	0.0456864	0.0595366	0.0499739	0.0747509	0.0296219	0.0240195	0.0193904	0.0495751	0.033812	0.0279304	0.0342228	0.0512448
0.0810089	0.0315086	0.0990588	0.099058	0.103568	0.0336807	0.0285725	0.114624	0.0518089	0.0774336	0.0545207	0.0233924	0.041316	0.0567427	0.02942	0.0638865	0.113943	0.0536646	0.0358707	0.0311515	0.0771697	0.0708666	0.0911593	0.0486525	0.0747948	0.0795905	0.11727	0.0897097	0.0795084	0.0963737	0.0816941	0.117807	0.137361	0.0610395	0.0911695	0.0785706	0.144163	0.119741	0.10671	0.15774	0.116307	0.168005	0.12433	0.0771022	0.073307	0.144173	0.195314	0.11048	0.106446	0.214852
0.0269833	0.0254374	0.0307015	0.0388544	0.0346693	0.0176488	0.0186418	0.0257023	0.0252259	0.0334602	0.0222637	0.0146655	0.0280112	0.0236002	0.0172246	0.033095	0.0348592	0.0201611	0.0223618	0.0160386	0.0295175	0.0338457	0.0247418	0.0236999	0.0336625	0.0334325	0.0250505	0.0163462	0.0283504	0.0388923	0.021138	0.16658	0.13537	0.0856936	0.0830486	0.0877474	0.114816	0.101245	0.0999115	0.0955702	0.0808865	0.0936391	0.0414693	0.0349553	0.0296673	0.0428384	0.0398974	0.0433065	0.0581194	0.058717
0.0281335	0.0209839	0.0389915	0.0438551	0.0445839	0.0208453	0.0225884	0.0317603	0.0284446	0.0410476	0.0314518	0.0163288	0.0314426	0.0239289	0.0248545	0.0391525	0.0396714	0.0385042	0.0223595	0.0208376	0.0505358	0.0437456	0.0303288	0.0324334	0.0418792	0.0378816	0.0359963	0.0279792	0.0348426	0.0571034	0.0268764	0.133823	0.115739	0.0831798	0.112847	0.0823743	0.103659	0.0961427	0.116582	0.14585	0.101805	0.144891	0.0650062	0.0418485	0.0386442	0.0608182	0.0672495	0.0492933	0.0748967	0.0919088
0.0395892	0.0305042	0.0381867	0.0585125	0.0505017	0.0186164	0.0227196	0.0326108	0.0299865	0.0496971	0.0356861	0.0186383	0.0394392	0.0243386	0.0214717	0.0481217	0.0501469	0.0328474	0.0239947	0.0226918	0.0407818	0.0484069	0.033912	0.0262411	0.0405781	0.0474237	0.0333591	0.0304686	0.0298444	0.0546407	0.0256819	0.201672	0.172467	0.12637	0.108934	0.130858	0.153102	0.140702	0.138211	0.130264	0.148149	0.143527	0.054949	0.0485151	0.0419454	0.069147	0.0482484	0.0630972	0.0986935	0.091568
0.0470619	0.0312062	0.0475376	0.058942	0.0623085	0.0215619	0.0217613	0.038457	0.0318202	0.0608795	0.0399222	0.0234828	0.0367328	0.02454	0.0255538	0.0495334	0.0623553	0.0342803	0.0240188	0.0294128	0.046917	0.0580104	0.0345097	0.0315226	0.0464021	0.056684	0.0401708	0.027379	0.0386984	0.0575221	0.0327089	0.151643	0.152374	0.0980095	0.236546	0.121673	0.125706	0.115985	0.216525	0.214537	0.169406	0.22722	0.165078	0.126205	0.114858	0.162398	0.128122	0.14178	0.116135	0.145357
0.0288375	0.0212153	0.0348284	0.0447292	0.0443245	0.016695	0.0207742	0.0287923	0.0280112	0.0403805	0.0321891	0.0175256	0.0324152	0.0207422	0.0254764	0.0445007	0.0320824	0.0408027	0.0240251	0.0220036	0.0601408	0.0467677	0.0266254	0.0274166	0.0427456	0.0373472	0.0347199	0.031062	0.0304411	0.0512876	0.0234312	0.121502	0.107473	0.0768964	0.0698909	0.0768739	0.110222	0.0980563	0.0837277	0.103595	0.0872082	0.113164	0.0465751	0.0310789	0.02749	0.0466812	0.0532626	0.0401822	0.0674911	0.0838908
0.0296241	0.0211645	0.0341966	0.0428571	0.0437355	0.0215966	0.0188513	0.0266302	0.0283928	0.0486603	0.0316049	0.0200537	0.0249578	0.0224304	0.0237768	0.0364774	0.047189	0.0254875	0.0249735	0.0163055	0.0383249	0.036693	0.0245302	0.0278077	0.0406939	0.0388636	0.0361133	0.0201396	0.0354349	0.0580301	0.0243728	0.142135	0.121369	0.08703	0.153058	0.102966	0.102855	0.0948842	0.166417	0.207034	0.151778	0.186181	0.0871697	0.0524255	0.0448222	0.0914821	0.0799368	0.0678973	0.0997607	0.133459
0.0443772	0.0244579	0.0562934	0.06502	0.0788068	0.032824	0.0248065	0.0457306	0.0381669	0.0715496	0.0510746	0.0248942	0.0346405	0.0367547	0.0316054	0.0577684	0.0740256	0.0442435	0.0339171	0.0280028	0.064785	0.0683205	0.0443268	0.0488646	0.0680444	0.0665307	0.0592064	0.0331129	0.0594804	0.0941588	0.0385707	0.245	0.211014	0.123144	0.176392	0.156036	0.193793	0.156615	0.248222	0.353589	0.233343	0.318877	0.150416	0.0880789	0.0784978	0.142952	0.154932	0.129378	0.156732	0.238794
0.0240632	0.018734	0.0280317	0.0332015	0.0360345	0.0198806	0.0181624	0.0369602	0.0239534	0.032824	0.0270071	0.0205695	0.0244063	0.0225773	0.022357	0.0301772	0.0377212	0.0329702	0.0192562	0.0287817	0.0437349	0.0305767	0.0310941	0.0274398	0.0354295	0.0314248	0.0340175	0.0352057	0.0283628	0.0396595	0.0296318	0.0757495	0.0691979	0.0427007	0.0806349	0.0425156	0.0760694	0.05157	0.0688757	0.110861	0.0756074	0.136983	0.0661871	0.0312684	0.0325942	0.0783802	0.0723274	0.0402133	0.0593488	0.0824711
0.0166165	0.0151644	0.0273834	0.0248258	0.033173	0.0227783	0.0160737	0.0264492	0.0248073	0.0278677	0.0243889	0.0223613	0.0193115	0.0264648	0.0187604	0.0271718	0.0277444	0.0272104	0.0256306	0.018884	0.035335	0.0287266	0.024406	0.0261187	0.0341127	0.0307305	0.0269274	0.0262788	0.0307657	0.0517655	0.0253834	0.0320151	0.0323925	0.0196711	0.020702	0.0230465	0.0362932	0.0276035	0.0265016	0.0388558	0.0289059	0.0350521	0.0249488	0.0218521	0.0185688	0.0277476	0.0232212	0.0198277	0.0250897	0.0317967
0.0303399	0.0200092	0.0349455	0.0491761	0.0517746	0.0201566	0.0206965	0.0314827	0.0240713	0.0481695	0.0362076	0.0192303	0.0352602	0.0213319	0.0236197	0.0526255	0.0402901	0.0479144	0.0220683	0.0181106	0.0724124	0.0589604	0.029179	0.03069	0.0510257	0.0496218	0.0366045	0.026952	0.0380191	0.0679985	0.02291	0.118334	0.109239	0.0808823	0.0676731	0.0843991	0.0901681	0.0863529	0.0939914	0.119555	0.0882845	0.103403	0.0533365	0.0293867	0.0281746	0.0452071	0.0575959	0.0460141	0.077611	0.0951575
0.0486834	0.0290812	0.0526886	0.0622347	0.0737889	0.0252332	0.0256312	0.0398303	0.0389654	0.07462	0.0559793	0.0252297	0.0415436	0.0247845	0.0242705	0.0681263	0.0662365	0.0391373	0.0219813	0.0348075	0.0639324	0.0751837	0.0382031	0.0324794	0.0682739	0.0743594	0.0469054	0.0328534	0.0487157	0.080984	0.0320364	0.164708	0.163959	0.120524	0.134026	0.155401	0.1359	0.138135	0.166969	0.201597	0.193384	0.179513	0.114757	0.0780803	0.0680554	0.117565	0.109025	0.11134	0.204015	0.187641
0.0367075	0.0406279	0.0355088	0.0499945	0.0446377	0.0176572	0.0290434	0.0363843	0.0248283	0.0510119	0.0384717	0.0154889	0.0423357	0.0214192	0.0207763	0.051514	0.0414081	0.0418763	0.0191361	0.0315018	0.0560123	0.0548393	0.0474643	0.0287101	0.0459206	0.0639551	0.0367365	0.066204	0.0451146	0.0821387	0.0422239	0.0738375	0.0636299	0.0585687	0.0430351	0.0562032	0.0663841	0.0587241	0.0490209	0.0616939	0.0701989	0.0646716	0.028956	0.0274522	0.0191829	0.046806	0.0254604	0.0245492	0.0535554	0.0547159
0.0294824	0.0168839	0.036069	0.0421995	0.0437498	0.019909	0.0182293	0.0321549	0.0241053	0.0407464	0.027406	0.0153991	0.0230492	0.0275662	0.01986	0.0350612	0.0403371	0.0351174	0.0203863	0.0234211	0.0494248	0.0444295	0.0309973	0.0212979	0.0407142	0.0391086	0.042427	0.0328708	0.0337027	0.0526369	0.0284749	0.0743568	0.0728874	0.0519619	0.0611012	0.0590358	0.0717385	0.0653431	0.0773684	0.109547	0.0755348	0.104852	0.0688213	0.0385488	0.0348223	0.0585852	0.0932322	0.0529161	0.0670175	0.117856
0.058854	0.0510079	0.0598347	0.113288	0.0942712	0.024212	0.0406447	0.0561003	0.0390048	0.108452	0.0701869	0.0236126	0.0737309	0.0389576	0.0213012	0.106971	0.0837839	0.0547112	0.02816	0.0567696	0.0877704	0.114549	0.0934925	0.0541722	0.100941	0.144432	0.0871867	0.110573	0.101015	0.173963	0.0800857	0.083403	0.0898679	0.0641338	0.0534146	0.0829087	0.0929864	0.0798719	0.0704116	0.0658817	0.0815289	0.0726705	0.0457475	0.0468929	0.0388279	0.0637161	0.0504325	0.0591337	0.10181	0.0989886
0.0482775	0.0418268	0.0518099	0.0732193	0.0653384	0.024679	0.0383798	0.0414349	0.0314444	0.0766155	0.0478651	0.0178306	0.0509749	0.0277764	0.0217602	0.0748542	0.0671445	0.0355853	0.0210726	0.0438521	0.0570396	0.0806029	0.0459549	0.0327226	0.0629079	0.0952989	0.0510153	0.0396927	0.0550449	0.0985312	0.0456762	0.108923	0.127651	0.088123	0.0930447	0.13145	0.122523	0.115223	0.119037	0.11956	0.150716	0.116285	0.0805166	0.0792583	0.0660087	0.0974943	0.0781031	0.100271	0.183432	0.143697
0.0423051	0.0205367	0.058015	0.0597335	0.0746688	0.029171	0.0188983	0.0467454	0.0396664	0.0719801	0.0457023	0.02449	0.03198	0.0427116	0.0273612	0.0517441	0.0750956	0.0395037	0.0346505	0.0251461	0.0601206	0.0633351	0.0486478	0.0453182	0.0692795	0.0650879	0.0601307	0.0311199	0.058244	0.0835864	0.0413694	0.135802	0.137624	0.0812896	0.105807	0.120993	0.145079	0.123766	0.140733	0.24629	0.155477	0.182644	0.159775	0.0794602	0.0899864	0.107559	0.202538	0.138166	0.160779	0.27104
0.02084	0.0146277	0.0258779	0.0272138	0.0293767	0.017034	0.013888	0.0218525	0.0171437	0.0260784	0.0209253	0.0144543	0.0172475	0.0159776	0.017302	0.0213686	0.0277995	0.0241926	0.0184077	0.0195181	0.0319387	0.0270883	0.0210239	0.0191893	0.0282719	0.0242034	0.0245099	0.0226412	0.024384	0.0373147	0.0213576	0.0356924	0.0353519	0.0268851	0.0290439	0.0334502	0.036731	0.0316707	0.0349249	0.0463229	0.0408429	0.0502169	0.0325481	0.0196845	0.0184746	0.0345741	0.0481296	0.0302602	0.0387995	0.0544316
0.0136221	0.0133554	0.0126452	0.0155097	0.0121971	0.00739541	0.0123285	0.0102279	0.0094572	0.0120431	0.0118367	0.0078657	0.0096425	0.00932068	0.00983949	0.0150674	0.0115497	0.0119813	0.00833881	0.0131995	0.0115575	0.01561	0.0101285	0.011728	0.0137749	0.0147844	0.0110251	0.0106979	0.0103307	0.0114659	0.0119417	0.0140812	0.0144094	0.0134549	0.0107632	0.0135716	0.0130128	0.0118148	0.0106253	0.0116172	0.0133147	0.0143682	0.0112525	0.0127589	0.00848731	0.0158444	0.0124613	0.0104001	0.0160208	0.0137944
0.0249915	0.0194367	0.024662	0.0223552	0.0218599	0.00988894	0.0171699	0.0185824	0.0178479	0.015899	0.0136605	0.0103232	0.0149604	0.0146428	0.0152453	0.0257986	0.0211599	0.0188045	0.0103552	0.0205988	0.0160077	0.0225745	0.017499	0.0167475	0.0207612	0.0199553	0.0185455	0.0186196	0.01595	0.0192011	0.0180959	0.0314001	0.029308	0.0254083	0.0230667	0.0282664	0.0234351	0.0220845	0.0216354	0.0197517	0.0204321	0.0223079	0.0188981	0.020568	0.0178954	0.0211564	0.0181885	0.0205977	0.0228981	0.0196856
0.0138578	0.0133624	0.0145911	0.0147067	0.0142505	0.0121645	0.0130058	0.0141663	0.0130702	0.0152729	0.0169008	0.0109897	0.0117379	0.0124456	0.0125757	0.0163503	0.0163382	0.0116955	0.0120469	0.0136779	0.015943	0.0154496	0.0107246	0.0184281	0.0212416	0.0168704	0.0153989	0.0115524	0.0206843	0.0207075	0.018065	0.0129046	0.0126307	0.0118691	0.0107085	0.0118253	0.0145107	0.0124697	0.0127543	0.0151351	0.0141996	0.0174253	0.013771	0.0141866	0.0126052	0.0187118	0.015526	0.0115202	0.0115514	0.0131222
0.0120055	0.0142704	0.0147649	0.0140449	0.0132679	0.00965195	0.01109	0.0156319	0.0100741	0.0104544	0.00948595	0.00917757	0.00783416	0.0111524	0.00844467	0.0111636	0.0151491	0.0102295	0.00991291	0.0123614	0.0106865	0.0107102	0.0134545	0.0117012	0.0132831	0.0128827	0.0115047	0.0158547	0.012986	0.0132779	0.0157576	0.0189916	0.0184786	0.0166039	0.0150291	0.0166269	0.0139268	0.0151657	0.0158302	0.0156748	0.0138061	0.0183546	0.0146409	0.0126419	0.0142391	0.0164095	0.0130758	0.0160819	0.0141074	0.0196058
0.0194052	0.0193404	0.0193775	0.0137583	0.0148161	0.0101916	0.0126981	0.0149367	0.00941917	0.0139551	0.0105464	0.00725939	0.0127188	0.00988388	0.00907156	0.0145438	0.0129492	0.0100026	0.00896216	0.0150183	0.0120044	0.0154307	0.0129999	0.0110672	0.0146902	0.0169625	0.010561	0.00938796	0.011205	0.0135289	0.0133813	0.0131344	0.0144356	0.00984961	0.0121198	0.0142009	0.0134221	0.0145198	0.0117878	0.0114123	0.0151418	0.0140267	0.0130908	0.0125213	0.0104163	0.016132	0.0129456	0.0135944	0.017895	0.0140015
0.0140977	0.0122911	0.0188361	0.0128176	0.0171414	0.0170164	0.0132766	0.0166421	0.01604	0.0169129	0.0155274	0.0186545	0.0147665	0.017829	0.0152655	0.020218	0.0206044	0.0141423	0.0119036	0.0188021	0.0167073	0.0148076	0.0144467	0.0169872	0.0224651	0.0168681	0.0154798	0.0139698	0.0203029	0.0186676	0.0189331	0.0174161	0.0184429	0.0181282	0.013648	0.0179742	0.0180498	0.016714	0.017403	0.013685	0.0159231	0.0162885	0.0148282	0.0172738	0.013475	0.0199611	0.0120682	0.0154316	0.0207009	0.0164216
0.0584037	0.0379226	0.0366021	0.0366726	0.0345175	0.0189594	0.0223698	0.0365587	0.0212863	0.0304394	0.0250052	0.0115541	0.0224283	0.0236849	0.0126032	0.0280442	0.043089	0.0213126	0.0117111	0.0248522	0.0229114	0.0319595	0.0311308	0.0201703	0.022657	0.0317588	0.0231321	0.0231598	0.019689	0.0233289	0.0228057	0.0399641	0.0470489	0.0245005	0.0380704	0.0291475	0.0408583	0.0326683	0.0374257	0.0367401	0.035189	0.0376764	0.0294607	0.0313599	0.0249768	0.0430836	0.0355678	0.0335721	0.0340923	0.0321794
0.0383948	0.0278703	0.0321597	0.0268319	0.0296939	0.0187072	0.0146216	0.0267827	0.0170442	0.0246548	0.0222206	0.0126964	0.020193	0.0235581	0.0151366	0.0266681	0.0365206	0.0194104	0.0137729	0.0184122	0.0227108	0.0263477	0.0195317	0.0164946	0.0231999	0.0269213	0.0193283	0.0147313	0.0183561	0.0229521	0.0218587	0.0233562	0.0301122	0.018364	0.0177554	0.023638	0.0306048	0.0238742	0.0254834	0.0204028	0.0243418	0.0234728	0.0211882	0.0229731	0.018905	0.0264908	0.025164	0.0215439	0.0278043	0.0226392
0.0594457	0.0489968	0.0474264	0.0390894	0.0405414	0.0270633	0.0348049	0.0358471	0.0308552	0.0342278	0.030515	0.0158898	0.0266594	0.0329832	0.0145335	0.0391381	0.0408856	0.018049	0.0162376	0.0416016	0.0231485	0.0394207	0.0250699	0.0242702	0.0301208	0.0431306	0.0272516	0.019831	0.0235739	0.030777	0.0286971	0.0391829	0.0505341	0.0257153	0.0296366	0.0333993	0.0441336	0.0395106	0.037254	0.0340174	0.0371082	0.0332905	0.0354171	0.0411086	0.034738	0.0457715	0.0364372	0.0394802	0.0426404	0.033679
0.0884276	0.0665985	0.0530263	0.0433986	0.0434642	0.0255907	0.032494	0.0570648	0.0262146	0.0304617	0.0255881	0.0141507	0.0264844	0.0314286	0.0147663	0.0296991	0.0532022	0.0208631	0.0154002	0.031236	0.0218694	0.0321989	0.0413021	0.0220523	0.0236424	0.0375707	0.0319847	0.0489015	0.0235868	0.0258365	0.0346355	0.0339347	0.0418168	0.0245243	0.0309355	0.0291691	0.0371601	0.0338565	0.027571	0.0257388	0.0314982	0.0286524	0.0243673	0.02812	0.0252262	0.0409875	0.0247492	0.0285741	0.0315893	0.0347082
0.0367706	0.0341217	0.0292609	0.0289267	0.0285223	0.0135619	0.0286569	0.0214218	0.0182419	0.0245006	0.0193736	0.0116609	0.0264485	0.0165379	0.014799	0.0262175	0.0298729	0.0143242	0.0131701	0.0286654	0.0180062	0.0314047	0.0187328	0.0142343	0.0209511	0.0324906	0.0189335	0.0156942	0.0176609	0.0238857	0.0189472	0.0455886	0.0533249	0.0326903	0.0375417	0.0378402	0.0434307	0.0398271	0.0397628	0.0345443	0.0418063	0.0344042	0.0352256	0.0372025	0.0307261	0.0418133	0.0316939	0.0377675	0.0445684	0.0346794
0.0433349	0.0279327	0.0348622	0.0247469	0.0293985	0.0187254	0.0174976	0.0340053	0.0197327	0.0237831	0.0221353	0.0124029	0.0166679	0.0250002	0.0159802	0.023494	0.0437551	0.0148525	0.0100338	0.0152799	0.0181006	0.0251629	0.0264936	0.016965	0.0206529	0.0266867	0.0238293	0.0253388	0.0202891	0.0232661	0.0226712	0.0260575	0.0261426	0.0144458	0.0168627	0.017048	0.024471	0.0205653	0.0215027	0.0198154	0.0241884	0.0243354	0.0185655	0.0163178	0.0174553	0.0261771	0.015948	0.0200687	0.0240642	0.0205775
0.0299124	0.0472952	0.0191334	0.0214285	0.0181372	0.00971894	0.0326878	0.0107166	0.0120857	0.0159096	0.014976	0.00830745	0.0183729	0.0109997	0.0106999	0.023142	0.0168137	0.0127327	0.00897015	0.0352566	0.013245	0.0264091	0.0149704	0.0106418	0.0136014	0.0238227	0.0129066	0.0149956	0.0128802	0.0155701	0.0105576	0.0168181	0.0207239	0.0139493	0.0161843	0.0165035	0.0205493	0.0225573	0.0171581	0.0163368	0.0186471	0.0165135	0.0187308	0.0197766	0.0159764	0.0186617	0.0136992	0.0199864	0.021471	0.0139619
0.0154355	0.0156704	0.0195157	0.0229265	0.0271535	0.016405	0.0115153	0.0217831	0.0161882	0.0215479	0.0231622	0.0187767	0.0153391	0.0156119	0.0158059	0.0242037	0.023113	0.0171775	0.0142842	0.0165989	0.0192966	0.0227209	0.0198946	0.0217433	0.0295596	0.0240687	0.0234905	0.0215187	0.0324906	0.0249465	0.0222309	0.0141705	0.0179155	0.0146649	0.0187508	0.016404	0.0186009	0.0155891	0.0175274	0.0205606	0.0216767	0.0248082	0.0162147	0.0173858	0.0149921	0.0263907	0.0237086	0.0210171	0.0203155	0.0264628
0.0169258	0.0178526	0.0224134	0.0234559	0.0294499	0.0177749	0.0175169	0.0260742	0.0210335	0.0216368	0.0226815	0.0193441	0.0162004	0.0150643	0.0195316	0.0226158	0.0240849	0.0231976	0.0146258	0.0260813	0.0234282	0.0235727	0.0181303	0.0196065	0.0257111	0.0297834	0.0231575	0.0324749	0.0260798	0.0315886	0.0304634	0.0302041	0.02684	0.0211354	0.0223999	0.0202955	0.035045	0.0234418	0.0228887	0.0260984	0.0279018	0.0363842	0.0194517	0.0184592	0.0124106	0.0299571	0.0225503	0.0171752	0.02139	0.0262389
0.0487557	0.0456728	0.0550689	0.04047	0.0499269	0.0404197	0.0222752	0.0716549	0.0442887	0.0314693	0.0334216	0.0262896	0.0254798	0.0380903	0.028522	0.0372905	0.0438022	0.0325487	0.0282554	0.0405853	0.0285876	0.0327643	0.0667028	0.0330317	0.0396292	0.0412753	0.0670533	0.141797	0.0455164	0.0410621	0.138935	0.0224026	0.0307867	0.0204776	0.019789	0.0264123	0.0248992	0.0261897	0.0265738	0.0228574	0.0268206	0.0240368	0.0182553	0.0182735	0.0200566	0.029484	0.0220377	0.0243767	0.0271971	0.025878
0.0400056	0.0251476	0.0379587	0.040754	0.0473986	0.0239065	0.0181649	0.0654724	0.0336721	0.0400236	0.0306903	0.0156483	0.0247581	0.0235224	0.0226129	0.034162	0.0508472	0.029029	0.0174456	0.027443	0.0305926	0.0358632	0.0393283	0.0249114	0.0367614	0.0424455	0.044081	0.0634626	0.0318232	0.0438507	0.0677652	0.0500866	0.0529198	0.0305172	0.0497611	0.0391098	0.0587195	0.0459315	0.0436248	0.0464316	0.0605804	0.0840005	0.0400606	0.036977	0.0296549	0.109149	0.0464821	0.0392665	0.0480133	0.0480428
0.0254692	0.0216643	0.022947	0.0199382	0.0259194	0.0176962	0.015872	0.0346145	0.0180876	0.0184267	0.0188651	0.0174584	0.0142929	0.016518	0.0159316	0.0201624	0.0258963	0.0217318	0.0141967	0.0179425	0.0182142	0.0197598	0.0236705	0.0162213	0.0224031	0.0236826	0.0246798	0.0424731	0.0231533	0.0241417	0.0420168	0.0234609	0.0265427	0.0184319	0.0228368	0.0215111	0.0262473	0.0252216	0.0207166	0.0262254	0.0254238	0.0245767	0.0213793	0.0207296	0.0189588	0.0291801	0.0235298	0.0216347	0.0234365	0.0247703
0.0208976	0.0195507	0.0215692	0.0214748	0.0219327	0.0154238	0.0137563	0.0229908	0.0174102	0.0187262	0.0151562	0.021266	0.0144221	0.015259	0.016192	0.020583	0.0188752	0.0182249	0.014681	0.0182513	0.0179594	0.0212678	0.0231117	0.0142332	0.025267	0.0269376	0.0213679	0.0391189	0.0241571	0.0244139	0.044154	0.0162915	0.02159	0.0150019	0.0135665	0.020626	0.018489	0.0178339	0.0180468	0.0180678	0.0190652	0.0200526	0.0150058	0.0150743	0.0152184	0.0228763	0.0186079	0.0170327	0.0223471	0.0226107
0.0172778	0.0159679	0.0177968	0.0130511	0.0154814	0.0103135	0.00911646	0.0148654	0.0128462	0.0161223	0.0156461	0.0104355	0.0118747	0.0111656	0.00944398	0.0198508	0.0141011	0.0138169	0.0106654	0.0155836	0.0168648	0.0168034	0.0121921	0.013304	0.0177818	0.0175534	0.0126659	0.0164889	0.0172333	0.0170464	0.0236467	0.0128443	0.0176198	0.0153692	0.0133425	0.0150161	0.0156497	0.0150555	0.0168316	0.0199723	0.0198842	0.0172711	0.0151409	0.0122461	0.0137226	0.0152105	0.0165306	0.0163158	0.0171462	0.0202635
0.0350118	0.0315317	0.0325166	0.0237823	0.0277138	0.0195777	0.0160498	0.0327246	0.0210764	0.0252488	0.0238892	0.0202776	0.0187831	0.0185168	0.018733	0.0319543	0.0243362	0.0220111	0.012025	0.0293467	0.0233766	0.0261075	0.0213145	0.0205805	0.0275603	0.0273622	0.0199971	0.0412916	0.0218656	0.0258339	0.0466134	0.0171986	0.0275764	0.0186427	0.0215878	0.0212503	0.0252112	0.0283892	0.0241048	0.0189475	0.0276227	0.0233104	0.0197896	0.0203806	0.019426	0.0288818	0.0221939	0.0239708	0.0229142	0.0246806
0.0163417	0.0125157	0.0260407	0.0248302	0.0229278	0.0174422	0.0168362	0.0222605	0.0174856	0.0203026	0.0170575	0.0132657	0.0185339	0.0177427	0.0214243	0.0230177	0.018798	0.0261064	0.0199549	0.0156669	0.0294255	0.0233408	0.016069	0.019371	0.0215884	0.0220912	0.0203002	0.0183782	0.0189908	0.020484	0.0229781	0.0420657	0.0448144	0.0482654	0.0251157	0.0378979	0.0397734	0.0482049	0.0338839	0.0296128	0.0301454	0.0222924	0.023249	0.0209227	0.0201491	0.0203374	0.0208794	0.0256992	0.0316906	0.0268075
0.0107101	0.00987111	0.0141587	0.010262	0.0120455	0.0144052	0.0108155	0.0167785	0.0146266	0.0123589	0.0129916	0.0158303	0.0125985	0.0124128	0.013137	0.0162781	0.0129229	0.0140767	0.012668	0.0134966	0.0152195	0.0170454	0.0128811	0.01299	0.0147705	0.0136082	0.0121659	0.0124143	0.0144916	0.0157627	0.0161571	0.0135667	0.0151885	0.0145109	0.012199	0.0149949	0.0153447	0.0127011	0.0153863	0.0102849	0.0144532	0.0137691	0.0105882	0.0108247	0.0105972	0.0101088	0.0118023	0.0125792	0.0146188	0.0115127
0.0116763	0.0130884	0.0128242	0.012947	0.0143644	0.0102831	0.0129678	0.0138897	0.0137718	0.0146731	0.016761	0.0149853	0.0140709	0.0145724	0.0117788	0.0206152	0.0149041	0.0155342	0.0119416	0.0165926	0.0169948	0.0193351	0.0104673	0.0177832	0.0227712	0.0236173	0.0159864	0.0121652	0.0213134	0.024377	0.0226289	0.010393	0.0104753	0.0104424	0.00911081	0.0102795	0.0108114	0.00993992	0.0120912	0.0131351	0.0102792	0.0111512	0.0126429	0.0129525	0.0103506	0.0107498	0.0123062	0.0108464	0.0142078	0.0164812
0.0111008	0.0117776	0.0202354	0.0154059	0.0196826	0.0143877	0.0103347	0.0136242	0.0230679	0.0156441	0.0162565	0.0204347	0.0118078	0.0156844	0.0146303	0.0188619	0.0140086	0.0169786	0.0128175	0.0168209	0.0186301	0.0169862	0.0130456	0.0129582	0.0228738	0.0214025	0.0142735	0.0122413	0.0160514	0.0230462	0.0224832	0.0160665	0.0193339	0.0173559	0.0169585	0.0175907	0.0167314	0.0156935	0.0202368	0.0189278	0.0214897	0.0174487	0.0172855	0.0195579	0.017557	0.0233105	0.0153835	0.0190615	0.022411	0.018187
0.0319268	0.0262364	0.0261195	0.025619	0.0254747	0.0182761	0.012742	0.0336299	0.0236679	0.0190607	0.0195498	0.0176837	0.0196615	0.0216432	0.0184177	0.0224269	0.0256819	0.0257889	0.0131028	0.0187515	0.0260017	0.0230353	0.0227814	0.0180185	0.0273883	0.0214773	0.0265667	0.0466208	0.018533	0.0244774	0.0256464	0.0411707	0.0413262	0.0248737	0.028388	0.0300116	0.045089	0.0330227	0.0288525	0.0262482	0.0307331	0.0443354	0.0204215	0.0199087	0.0174174	0.0370939	0.0271458	0.022407	0.031525	0.0310035
0.0211644	0.0183192	0.0210478	0.0240499	0.0228386	0.0149676	0.013061	0.0287007	0.0223024	0.0192743	0.0163883	0.0220292	0.0156525	0.0158625	0.0161723	0.0201629	0.0193229	0.0236467	0.0178068	0.0181408	0.0238008	0.021888	0.0205133	0.0190485	0.0228435	0.0202358	0.0228518	0.0356143	0.0219095	0.0280692	0.0271226	0.0337126	0.0331496	0.0162761	0.0198754	0.0185556	0.0363161	0.0229554	0.0227291	0.0265338	0.0219748	0.0358863	0.0167084	0.0161404	0.0153475	0.029088	0.0191332	0.015954	0.0192813	0.0229646
0.0678451	0.047947	0.04847	0.0431533	0.0427209	0.0199134	0.0259732	0.0446598	0.0320503	0.0294737	0.0255219	0.0204815	0.0268965	0.0244567	0.0230903	0.037645	0.0349594	0.0380016	0.0184315	0.0317805	0.0352657	0.0407187	0.0418739	0.0202919	0.0332032	0.0355168	0.036643	0.0753539	0.0294038	0.034782	0.0464512	0.0522069	0.0676322	0.0362545	0.0356177	0.0422216	0.0610774	0.0579577	0.0444247	0.0421478	0.0442499	0.0532118	0.0373023	0.0347166	0.0322739	0.0527902	0.051378	0.0413119	0.047349	0.0447441
0.0589806	0.0338661	0.0446784	0.0553728	0.0502771	0.0217821	0.0257718	0.0402109	0.0305485	0.0435085	0.034591	0.0173294	0.0323356	0.026441	0.0222339	0.0448613	0.0462578	0.0373648	0.017073	0.0311714	0.0409237	0.0445221	0.039017	0.0265916	0.038013	0.0449509	0.0414795	0.060089	0.0334582	0.0431693	0.0445476	0.0645829	0.0848274	0.0382388	0.0436359	0.047593	0.0826708	0.074338	0.0493459	0.0479756	0.052993	0.0604358	0.0495669	0.0423271	0.0377229	0.0580985	0.0594628	0.0475609	0.0516002	0.0499367
0.0172774	0.0167272	0.0211956	0.0180442	0.0214599	0.0182027	0.0123784	0.0173812	0.0207956	0.0187218	0.0186789	0.0172138	0.013346	0.0199582	0.0166227	0.0175209	0.0207132	0.0188582	0.0176263	0.0168111	0.020679	0.019824	0.0175414	0.0176619	0.0226278	0.0231616	0.0193686	0.0232437	0.0224562	0.0253522	0.0143026	0.018708	0.0191852	0.0138039	0.014999	0.0140466	0.0217087	0.0161468	0.017121	0.0189222	0.0155949	0.018865	0.0161078	0.0194936	0.0140651	0.0207047	0.0189739	0.0161549	0.0169904	0.0193626
0.0409111	0.032008	0.0310997	0.03092	0.0275438	0.0161235	0.0188748	0.0289549	0.023704	0.0203902	0.0173623	0.02209	0.0230821	0.0228523	0.0219685	0.0269355	0.0230452	0.0292091	0.0191526	0.024362	0.0265624	0.028185	0.0276986	0.0173824	0.0307932	0.0290372	0.0248712	0.0601077	0.0271093	0.0321573	0.0380806	0.0383954	0.0455712	0.0265269	0.0246998	0.0267482	0.0397369	0.0442303	0.0313592	0.0249595	0.0303267	0.0342805	0.0252448	0.0230425	0.0193539	0.0342682	0.0315776	0.0252145	0.0305357	0.0263026
0.0648245	0.0359911	0.0586713	0.0515968	0.0507415	0.0271744	0.0248362	0.0565046	0.0332332	0.0349217	0.0263727	0.0189526	0.0280096	0.0265271	0.0240625	0.0394375	0.0449828	0.0332881	0.0216632	0.0271187	0.0353063	0.0402651	0.051918	0.0268011	0.0362823	0.0426407	0.043731	0.0794785	0.0324521	0.041053	0.0483307	0.0437632	0.0632404	0.0365206	0.0372398	0.0382837	0.0641445	0.0546279	0.0382645	0.039944	0.0387015	0.0495012	0.0378178	0.033278	0.0329924	0.0483028	0.049176	0.0396581	0.0461677	0.0485293
0.016704	0.0143149	0.0173494	0.0171308	0.0193034	0.0156932	0.0117676	0.0211975	0.0181364	0.0139139	0.0152901	0.015689	0.0125563	0.0163041	0.0136816	0.0142093	0.0185985	0.019168	0.0162412	0.0168918	0.020334	0.0167606	0.0195238	0.01709	0.02496	0.020742	0.0192485	0.0299479	0.0228315	0.0230433	0.0263475	0.0211628	0.0221986	0.0159484	0.0174613	0.0166575	0.0236975	0.0211151	0.0171754	0.0201412	0.0214708	0.0258595	0.0155732	0.0159776	0.012496	0.0224165	0.0204294	0.0177456	0.0193016	0.0224725
0.0198472	0.0172509	0.0215292	0.0183143	0.0199051	0.0131686	0.0108627	0.0185589	0.0169525	0.0188173	0.0210222	0.0197276	0.0162581	0.0176219	0.0177894	0.0221684	0.0185758	0.0199088	0.0157964	0.0187522	0.020593	0.0222988	0.0192987	0.0201538	0.0306137	0.0236657	0.0185332	0.020554	0.028031	0.028111	0.0212584	0.0173888	0.0221162	0.0167845	0.0166037	0.0191604	0.0184271	0.0214635	0.0203425	0.0215104	0.0223814	0.020307	0.0184507	0.020038	0.0195681	0.023377	0.0227323	0.0198992	0.0238487	0.0191075
0.0359984	0.0210578	0.0427921	0.0441461	0.0463036	0.0197664	0.0182379	0.0361961	0.0300929	0.031812	0.0257127	0.0212643	0.0231249	0.0250137	0.0210136	0.0425406	0.0346498	0.0393993	0.0215933	0.0244119	0.0501072	0.045108	0.0391633	0.0238262	0.0398857	0.0424753	0.0425037	0.0556477	0.034344	0.0439148	0.0431	0.03422	0.0442015	0.0277579	0.0182956	0.0331533	0.0437007	0.0395262	0.0347289	0.0341052	0.0310957	0.0366568	0.0285424	0.0252262	0.0240486	0.0304691	0.0421236	0.0321061	0.0359493	0.0461741
0.0273575	0.0397746	0.0236662	0.0222843	0.0221227	0.0165327	0.0204619	0.0190768	0.0203424	0.0175711	0.0195512	0.0183352	0.0180745	0.0143531	0.0140201	0.0252057	0.0158602	0.018622	0.0147947	0.0323321	0.0183572	0.02235	0.019211	0.0191368	0.0265473	0.0232566	0.0179152	0.0546588	0.0218801	0.0212965	0.0435113	0.0167334	0.0239157	0.0200435	0.0185649	0.024538	0.0194472	0.0226594	0.0264121	0.0256436	0.0261486	0.023046	0.0201931	0.0200812	0.0199534	0.0232014	0.0243948	0.0223237	0.0231637	0.024391
0.0469734	0.0480936	0.0310917	0.0525582	0.0402111	0.020886	0.0238132	0.0371097	0.0259983	0.0364481	0.027749	0.0132587	0.0275798	0.0183046	0.0196027	0.0370013	0.0350392	0.0266971	0.0149214	0.03659	0.0293336	0.036543	0.0405088	0.0252267	0.0381179	0.0439707	0.0387583	0.113993	0.033699	0.0393076	0.0661069	0.0356681	0.042755	0.0232213	0.0286619	0.0301114	0.0411585	0.0343816	0.0328139	0.0343243	0.0388918	0.0418571	0.0339254	0.0293776	0.0260181	0.0501199	0.031477	0.0291283	0.0398149	0.0349582
0.0238854	0.0210287	0.0287101	0.0523502	0.0502983	0.0245469	0.0213172	0.029011	0.0350973	0.0529719	0.0515702	0.024135	0.0484313	0.0313913	0.027035	0.0764209	0.0286595	0.058229	0.0268795	0.0499882	0.0855699	0.0822454	0.0461563	0.040359	0.0960714	0.139269	0.0471648	0.0513267	0.0659663	0.179398	0.0399753	0.0249399	0.0291753	0.0223576	0.0142686	0.0191115	0.0267808	0.0263902	0.0166859	0.0214692	0.019849	0.0223986	0.0200454	0.0187085	0.0180071	0.0346746	0.0250454	0.0229202	0.0235736	0.0264776
0.029991	0.042147	0.0294285	0.0340132	0.0320508	0.0209283	0.0318935	0.025357	0.0281804	0.0354059	0.023816	0.0164894	0.0246505	0.0217995	0.0174829	0.0410543	0.0372105	0.0203948	0.0143974	0.0601023	0.0218969	0.0331792	0.0299461	0.027813	0.0336627	0.0545834	0.0287163	0.0532167	0.0302646	0.0376155	0.0405525	0.0217494	0.0347795	0.0173364	0.0203593	0.022937	0.0284318	0.0241065	0.0284975	0.0268099	0.0303406	0.0280209	0.0262002	0.028022	0.0246817	0.0331837	0.029656	0.0288945	0.0264003	0.0267138
0.0216589	0.0175087	0.0233863	0.02609	0.0239789	0.0175152	0.0120841	0.0235303	0.0244297	0.0217983	0.0201204	0.023277	0.0141275	0.0200271	0.0168434	0.0189098	0.0205205	0.023553	0.0220484	0.0160328	0.0267324	0.0214412	0.0163695	0.015265	0.0192693	0.0341596	0.0163761	0.0190371	0.0147139	0.0421489	0.0198991	0.0267979	0.031958	0.0220429	0.0160344	0.0176149	0.0227269	0.0233963	0.0174297	0.0183963	0.0212614	0.0221978	0.0181645	0.0194302	0.0173269	0.0315106	0.0222328	0.0214478	0.0193356	0.019826
0.0272962	0.02292	0.018844	0.0210458	0.0206471	0.0112816	0.022178	0.0148407	0.0137658	0.0150018	0.0157947	0.0100371	0.0267458	0.0136712	0.00933055	0.0212236	0.0139759	0.021404	0.0122074	0.0208334	0.0184364	0.0196558	0.0147292	0.0114051	0.0148616	0.0199104	0.0153647	0.0190025	0.0127704	0.0184675	0.0178432	0.0286279	0.0331904	0.0206886	0.0252285	0.0230593	0.0230753	0.0287896	0.0233306	0.0225021	0.0224282	0.0201645	0.0209602	0.0203097	0.0175038	0.021835	0.0180387	0.0195378	0.0248967	0.0157926
0.0172957	0.0137164	0.0258921	0.0238423	0.0314888	0.0215042	0.0141671	0.0290621	0.0211786	0.0238875	0.0257638	0.0171842	0.0167996	0.0194868	0.0169206	0.0215836	0.0314356	0.0321745	0.0173047	0.016715	0.0327117	0.0238501	0.0221983	0.0226302	0.0258959	0.0268487	0.0239771	0.0205751	0.0242762	0.024445	0.0213433	0.0449389	0.0461393	0.0415238	0.0189591	0.0331767	0.0338223	0.0467461	0.0241318	0.0235652	0.0272586	0.0209761	0.018319	0.0207602	0.0168764	0.0284315	0.0178919	0.0212198	0.0252029	0.0248692
0.0174454	0.0133776	0.0178333	0.0204642	0.0221188	0.0152065	0.0128281	0.0183294	0.0139721	0.0207021	0.0224385	0.0166524	0.0156776	0.0135955	0.0138671	0.020603	0.0197651	0.0268893	0.0131275	0.0193254	0.0246509	0.0197451	0.0145989	0.0183049	0.0256846	0.0231843	0.0164639	0.0161052	0.0237919	0.0264965	0.0177606	0.0295032	0.0320815	0.0295139	0.0181847	0.0226941	0.0251426	0.0263658	0.023493	0.0208617	0.0249698	0.018804	0.0170562	0.0165865	0.0150247	0.0218005	0.0174932	0.0172946	0.0210966	0.019722
0.0713547	0.0427724	0.0822006	0.0935025	0.0879429	0.0374115	0.0371426	0.0640441	0.052433	0.0793222	0.0489402	0.0240547	0.0608871	0.0386508	0.0295701	0.080402	0.11092	0.0359722	0.025156	0.0667761	0.0455733	0.077414	0.0579038	0.0400866	0.0613058	0.096887	0.0542921	0.0580723	0.0526766	0.0841399	0.0557806	0.113688	0.156277	0.0543168	0.0586071	0.0753072	0.181593	0.116708	0.084886	0.0806736	0.100852	0.0946515	0.0709049	0.0762791	0.0661536	0.0924238	0.0776174	0.0884705	0.0926476	0.0933929
0.11228	0.136959	0.104928	0.122486	0.101639	0.0456153	0.0760444	0.0916738	0.0620135	0.0952555	0.0699439	0.0195082	0.0682249	0.0498334	0.0250096	0.110942	0.142689	0.048281	0.0265766	0.121943	0.0573062	0.105834	0.123861	0.048984	0.077368	0.142558	0.0739141	0.13898	0.0655733	0.0929003	0.0983489	0.052633	0.0743386	0.0367698	0.0394758	0.0546261	0.066498	0.0650134	0.0500026	0.0416683	0.0543674	0.0550595	0.0464897	0.0567116	0.0495931	0.0712259	0.0519772	0.0591873	0.0623383	0.0603399
0.0419519	0.0494875	0.040553	0.0428945	0.0439265	0.0225728	0.0323694	0.0372644	0.0295774	0.037531	0.0352058	0.0180143	0.0289184	0.0234683	0.0187986	0.0492974	0.0463176	0.0232044	0.0120419	0.0736674	0.0267171	0.0451378	0.0269496	0.0271582	0.0345281	0.056497	0.0308173	0.0430295	0.0342287	0.0402723	0.0351883	0.0366252	0.0491446	0.0232582	0.0261184	0.0327287	0.0445602	0.0449904	0.0352332	0.033452	0.039848	0.0409313	0.0373644	0.0370193	0.0372054	0.0466315	0.0436496	0.0405308	0.0418187	0.040961
0.0197459	0.0199183	0.0221195	0.0274186	0.0295983	0.0182588	0.0181213	0.022941	0.0212701	0.0253387	0.0252837	0.0198797	0.0212792	0.0192988	0.02083	0.0289021	0.0274906	0.0247649	0.0156723	0.0258024	0.0267221	0.0251301	0.0211528	0.0231538	0.0289956	0.028949	0.0224821	0.0266763	0.0257118	0.0336989	0.0255818	0.0332916	0.0370166	0.0233697	0.0239852	0.0291253	0.0419166	0.030206	0.0299853	0.0299395	0.0314502	0.0365023	0.025673	0.0253506	0.0232467	0.0330544	0.0316432	0.0286013	0.0323532	0.0310953
0.0197185	0.0355137	0.0238077	0.0218768	0.0232449	0.0140509	0.0196892	0.0203014	0.0148616	0.0285618	0.0261539	0.0219169	0.0154456	0.018386	0.0150023	0.0273212	0.0265694	0.0164107	0.015872	0.0398132	0.0200903	0.0233831	0.0196308	0.0224009	0.0332559	0.0318059	0.0259755	0.0240437	0.0380134	0.0332948	0.0304112	0.0166406	0.0248576	0.0161431	0.0189819	0.0183777	0.0213115	0.0209614	0.0227648	0.0277349	0.0248954	0.0294194	0.0204495	0.0175833	0.0201144	0.0264097	0.0271263	0.0235547	0.0238826	0.0335036
0.058327	0.0440837	0.0514285	0.0457935	0.0474341	0.0243881	0.031818	0.0396801	0.0281301	0.0436765	0.0321886	0.0200395	0.028658	0.0336051	0.0179948	0.0370223	0.0466268	0.0236753	0.017884	0.0390538	0.027091	0.0375822	0.0263484	0.0245705	0.0367786	0.0446252	0.0303449	0.0242518	0.0259714	0.0341723	0.0357966	0.0376066	0.0547949	0.0277582	0.0302469	0.0365622	0.0470289	0.0404614	0.0383102	0.0345371	0.0405803	0.0376167	0.0356384	0.0426902	0.0330977	0.0488951	0.0401806	0.0406483	0.0463649	0.0401511
0.0304269	0.0350934	0.0253077	0.0181154	0.0218861	0.01472	0.0244643	0.0202189	0.0155421	0.0214281	0.0227353	0.0122243	0.0170569	0.0162275	0.0131623	0.0252693	0.0203918	0.0187389	0.0126447	0.0342975	0.0186077	0.0212666	0.0134268	0.020258	0.0229873	0.025364	0.0173439	0.0167941	0.0192134	0.0233295	0.0233218	0.0152816	0.0214455	0.0161129	0.0168904	0.0159722	0.0225079	0.0199881	0.0191466	0.0233592	0.0185989	0.024477	0.0212097	0.0253461	0.0241438	0.0272102	0.0268958	0.0229774	0.024999	0.0245709
0.069433	0.0471744	0.0630028	0.066106	0.0656527	0.0326643	0.0360277	0.0496199	0.0374948	0.0624247	0.0416842	0.0262624	0.0372311	0.036583	0.0244775	0.0499839	0.0652949	0.028183	0.0247497	0.0438752	0.0317437	0.0479071	0.0362783	0.03013	0.0450117	0.0629395	0.041327	0.0299518	0.0375278	0.0483372	0.0429165	0.0929854	0.11936	0.0392097	0.056735	0.0588181	0.101139	0.0784416	0.0690182	0.0560213	0.0739111	0.0633718	0.0583773	0.063807	0.0511793	0.0748013	0.0747263	0.0668196	0.073662	0.0653325
0.107599	0.103043	0.0815534	0.0808725	0.0789342	0.038662	0.0692777	0.0586853	0.0450913	0.0701543	0.0455304	0.0288546	0.0525444	0.0382403	0.0283682	0.0704942	0.0839454	0.0336872	0.0235415	0.0907348	0.0369032	0.0706214	0.0488839	0.0352179	0.0493384	0.104559	0.0441464	0.0403708	0.0387084	0.0527442	0.0497867	0.100018	0.153654	0.0505494	0.0644276	0.0762183	0.124713	0.104472	0.0816109	0.0754558	0.0876024	0.0726212	0.0897354	0.0993868	0.0849642	0.100077	0.0884024	0.10068	0.0992247	0.0798437
0.026217	0.0288941	0.0260091	0.0269895	0.0271066	0.0190077	0.0211496	0.0225861	0.0167783	0.0235559	0.0230262	0.0177336	0.0201066	0.0229229	0.0145623	0.0328154	0.0263412	0.0165936	0.0123887	0.0316552	0.0184783	0.0267433	0.0202079	0.0192887	0.0243805	0.0299989	0.0219095	0.0259764	0.0238465	0.0250893	0.0270671	0.0237739	0.0415077	0.0212873	0.0183327	0.0242572	0.0320944	0.0293815	0.0222331	0.0199669	0.0283227	0.0245148	0.0243394	0.0275562	0.0275676	0.0302727	0.0260423	0.0272771	0.0324923	0.0227902
0.0552281	0.0347048	0.0642584	0.0633961	0.0646758	0.0280917	0.0286014	0.0488011	0.0380042	0.0599651	0.0359035	0.0181338	0.0373394	0.0354642	0.019391	0.0539363	0.0710052	0.0288075	0.0194948	0.0457034	0.0379676	0.0582413	0.0362087	0.0294357	0.045517	0.070639	0.0423227	0.0327206	0.0377053	0.0495203	0.0398449	0.0819023	0.119716	0.0427967	0.0486758	0.0637213	0.110722	0.0842982	0.0682922	0.0598742	0.0750383	0.0663671	0.0584072	0.0605599	0.0547608	0.0730038	0.0696781	0.0724721	0.074122	0.0677081
0.0417187	0.029934	0.0451604	0.0399859	0.0453943	0.0236219	0.0195024	0.0369335	0.0265984	0.0439821	0.0296264	0.0207417	0.0277876	0.025384	0.0228733	0.0439765	0.0452246	0.0250107	0.0137438	0.0307639	0.0289101	0.0397975	0.0286489	0.0230364	0.0344476	0.0452186	0.0270541	0.0316897	0.029016	0.0396988	0.0345168	0.0406489	0.0694068	0.0273773	0.0289179	0.0369964	0.067004	0.0507143	0.0408853	0.0335541	0.046568	0.0441316	0.0378542	0.0417825	0.0387728	0.0446834	0.0413337	0.0438724	0.046619	0.0425162
0.0785517	0.0399683	0.0877633	0.0897364	0.090206	0.0365857	0.0346028	0.0674056	0.0515255	0.0841228	0.0487889	0.0325557	0.0482693	0.0462814	0.0319917	0.0652373	0.0963473	0.034703	0.0291506	0.0468985	0.0397748	0.0643533	0.0481496	0.0379967	0.0603504	0.0887751	0.0564607	0.0388752	0.0518332	0.0681359	0.055437	0.135272	0.192493	0.0633042	0.0760584	0.0852808	0.190487	0.132209	0.106595	0.105154	0.108866	0.107022	0.102315	0.104155	0.09624	0.118216	0.137148	0.127728	0.113247	0.123575
0.0281954	0.0227848	0.0275297	0.0256557	0.0275507	0.016055	0.0202113	0.0199177	0.0219284	0.0225635	0.0226841	0.0163284	0.0222477	0.0197547	0.0219636	0.0293932	0.0234337	0.0245151	0.0163244	0.0264284	0.0236009	0.0254009	0.0195775	0.0218451	0.0239309	0.0255536	0.0220398	0.021121	0.0238708	0.0227971	0.0269104	0.0426865	0.0487511	0.0394958	0.0277373	0.0353523	0.0362413	0.0446898	0.0368443	0.0296261	0.0329519	0.0309778	0.0319755	0.0298152	0.0273835	0.0296086	0.0272536	0.0280274	0.0336951	0.0242411
0.0461729	0.0648744	0.0246786	0.0246734	0.0243249	0.0148775	0.0320506	0.024776	0.0207578	0.0183798	0.0204109	0.0146339	0.0199932	0.014713	0.0166536	0.0263373	0.023134	0.0223512	0.0130733	0.0421592	0.019242	0.0270929	0.0257634	0.0187697	0.0285849	0.0236524	0.018007	0.0344413	0.0240566	0.0262871	0.0267199	0.0327364	0.0385883	0.0229074	0.0228174	0.0265045	0.0286346	0.0310299	0.0232834	0.020622	0.022232	0.0235661	0.025375	0.0295845	0.0232314	0.0300641	0.0220492	0.02541	0.0272653	0.0194836
0.01844	0.0166507	0.0214394	0.0199468	0.022233	0.0128318	0.014057	0.0204976	0.0164878	0.0169551	0.0211943	0.0164426	0.0178851	0.0194596	0.0158191	0.0239602	0.0220427	0.0190099	0.0129374	0.0159024	0.0205018	0.0206902	0.0146994	0.0184566	0.0241828	0.0232666	0.0202725	0.0182483	0.0237484	0.0254607	0.0219099	0.028294	0.032391	0.0235114	0.019151	0.0243791	0.0303053	0.0330183	0.025732	0.0222935	0.0243369	0.0238702	0.0231189	0.0247585	0.0213296	0.0224094	0.03108	0.0226275	0.027777	0.0205696
0.0219626	0.0197859	0.0270923	0.0326683	0.0313717	0.0182103	0.0181192	0.0231976	0.0226295	0.026533	0.0219428	0.0166256	0.02237	0.0233967	0.0207747	0.0294024	0.0220213	0.0279419	0.0190707	0.0202351	0.0326179	0.028884	0.019156	0.0258552	0.0318275	0.025579	0.0271114	0.023719	0.024762	0.0263277	0.0279429	0.0522503	0.0563404	0.0401007	0.0272143	0.0382115	0.05647	0.0499562	0.0406852	0.0440372	0.0405591	0.0472649	0.0334949	0.0261334	0.0270025	0.0296447	0.0462003	0.0312292	0.0415391	0.0396974
0.0353189	0.0754912	0.0234376	0.0231001	0.0225243	0.0122424	0.0557028	0.0167417	0.0173527	0.0213567	0.0208662	0.0137329	0.0240265	0.019793	0.0131526	0.0334395	0.0277022	0.0183389	0.0154176	0.0879426	0.0182993	0.028455	0.0218002	0.0211602	0.0282014	0.0373521	0.0170366	0.0198711	0.0220994	0.0262945	0.0254836	0.0276082	0.0338459	0.0249349	0.0214162	0.0294607	0.0273908	0.0333249	0.023	0.0227297	0.0261025	0.0296089	0.0224981	0.0258281	0.0237579	0.0315373	0.0260518	0.0263268	0.0252365	0.0231541
0.0201402	0.03913	0.0195926	0.015402	0.0182125	0.0137764	0.0248618	0.0138823	0.0186824	0.0220629	0.0226678	0.0153798	0.0170238	0.0149027	0.0128024	0.0273972	0.0207239	0.0186592	0.0107328	0.0486265	0.0226568	0.0231241	0.0133657	0.0203545	0.0272823	0.0310344	0.0148709	0.0184916	0.0227198	0.0257197	0.023083	0.0158243	0.0180659	0.0152239	0.0142418	0.016711	0.017675	0.0176984	0.0148734	0.020816	0.0185115	0.022288	0.0210868	0.02541	0.0236433	0.0245997	0.0215844	0.0195459	0.0166483	0.0226672
0.016161	0.02785	0.0237573	0.0198973	0.0238004	0.0184798	0.02295	0.0241223	0.0195891	0.0189655	0.018432	0.0113706	0.0199123	0.0180951	0.0146541	0.020817	0.0228542	0.0219135	0.012872	0.039399	0.0168983	0.0205124	0.0229368	0.0187659	0.0197368	0.0261543	0.0206977	0.0215528	0.0209799	0.0175052	0.0226077	0.0312059	0.0316539	0.0331609	0.0196407	0.0291997	0.0214035	0.0356492	0.0177052	0.0155326	0.0204912	0.0186656	0.0157186	0.0162537	0.0146855	0.0243046	0.0200296	0.016074	0.0173498	0.0183582
0.0178255	0.0397082	0.0195435	0.022328	0.0234377	0.0160938	0.0252664	0.0199264	0.0190219	0.0239822	0.0220759	0.0131916	0.01718	0.0187746	0.0159761	0.023615	0.0249792	0.0175352	0.0134176	0.0424449	0.0184302	0.0224968	0.0249639	0.0233267	0.0315157	0.0287856	0.0241562	0.0198771	0.0312367	0.0309355	0.032737	0.0259421	0.0282908	0.0248489	0.0179818	0.0239584	0.0272687	0.0290895	0.0231261	0.0278754	0.0239551	0.032265	0.0234512	0.0254985	0.022385	0.0310571	0.0257735	0.0210158	0.024337	0.0257884
0.0221579	0.0266766	0.0239795	0.0182418	0.0225834	0.0188109	0.0179277	0.0161934	0.0195871	0.0269057	0.0210743	0.0174098	0.0168771	0.0156159	0.0136977	0.0288114	0.0225488	0.0165173	0.0138984	0.0338004	0.0214905	0.0238054	0.0172148	0.0182106	0.0265303	0.0288796	0.0160468	0.0205241	0.0236953	0.0272404	0.0235612	0.0217709	0.0243424	0.0195648	0.0212204	0.0220599	0.0228697	0.0199026	0.0217544	0.0281012	0.0218471	0.0293346	0.020894	0.0247719	0.0222666	0.0285813	0.0229656	0.0225623	0.0243648	0.0279206
0.0142398	0.020101	0.0145965	0.0151258	0.0165761	0.0146297	0.0149753	0.0104512	0.0128859	0.014473	0.0128669	0.0106085	0.0167983	0.0119945	0.0113063	0.020932	0.0166939	0.019729	0.00990387	0.0236362	0.0187124	0.0179967	0.0125191	0.0111049	0.0128965	0.0170896	0.0129118	0.00996282	0.0121958	0.0140087	0.00955211	0.0307297	0.034108	0.0276263	0.0209669	0.0304176	0.0238142	0.035405	0.0216425	0.0173702	0.0236004	0.0162578	0.013758	0.0141256	0.0119183	0.0153948	0.0150385	0.0143237	0.0208934	0.0129644
0.0254099	0.0264161	0.0226561	0.0184377	0.0183452	0.0144918	0.0206783	0.0199617	0.0187505	0.0222673	0.0196198	0.0140435	0.0164604	0.0187127	0.012092	0.0275044	0.0220168	0.0136013	0.0119468	0.0314114	0.0202608	0.0213928	0.0146506	0.0186106	0.0269378	0.0268787	0.0150591	0.0167601	0.0219149	0.0267575	0.0239877	0.0223446	0.0290204	0.0182307	0.0180028	0.0244878	0.0276743	0.025098	0.0221414	0.0234338	0.0257179	0.02568	0.0220216	0.0231197	0.0214177	0.0253487	0.0238695	0.0214193	0.0247297	0.0193344
0.0201238	0.0205483	0.0256961	0.0169164	0.0212907	0.0173239	0.0140035	0.0142205	0.0213359	0.0216173	0.0191464	0.0195348	0.0155373	0.0194094	0.0145164	0.0225447	0.016613	0.0145125	0.0145551	0.0168563	0.0190711	0.0183924	0.0120412	0.0175496	0.0266838	0.022798	0.0155764	0.0161704	0.0222717	0.0228277	0.0221376	0.0180462	0.0218983	0.015635	0.0148044	0.0181757	0.0206552	0.0214138	0.0197837	0.0266766	0.0183083	0.0253475	0.022279	0.0230755	0.0195045	0.0286967	0.0224183	0.0185829	0.0206039	0.0199943
0.0169977	0.0183461	0.0166289	0.0177013	0.0176607	0.0115312	0.0136657	0.0147386	0.014154	0.0167585	0.0173415	0.0155291	0.0154261	0.0137362	0.0118661	0.019548	0.0175231	0.0168075	0.0114861	0.0198088	0.0173031	0.0181396	0.0148203	0.018515	0.0196509	0.0201973	0.0156287	0.01654	0.0221515	0.023089	0.0203436	0.0245089	0.0285891	0.0243456	0.017267	0.0245765	0.0240436	0.0219735	0.0224505	0.0204014	0.0191429	0.0212255	0.0227018	0.0190548	0.0192672	0.0255637	0.0243663	0.0206729	0.0222705	0.0188083
0.0268296	0.0678066	0.0226777	0.0225921	0.022003	0.0131413	0.0354237	0.0156851	0.0174515	0.0206975	0.0199844	0.0120516	0.0197391	0.0143909	0.0108825	0.0266716	0.0201028	0.0172369	0.00982663	0.0524668	0.0211681	0.0268802	0.0170359	0.0204505	0.0275268	0.0328398	0.0178613	0.0328327	0.0201429	0.0244584	0.0245062	0.0229294	0.0286998	0.0216598	0.0187617	0.0219408	0.024278	0.0239907	0.0222477	0.0261451	0.022429	0.0316893	0.0252428	0.0237045	0.0208346	0.0263001	0.0282111	0.0231885	0.0259578	0.0249569
0.0165238	0.0169049	0.0196342	0.0163124	0.017503	0.0140751	0.011606	0.0130395	0.0152001	0.0188327	0.0162666	0.0167946	0.0146084	0.0150975	0.0123942	0.0262539	0.0162609	0.0144695	0.0149933	0.019252	0.0207509	0.0194435	0.0172773	0.0189024	0.0284066	0.0256096	0.0162675	0.0194397	0.0292675	0.0324547	0.0216804	0.0193928	0.0206404	0.0195826	0.0163385	0.0229852	0.0213989	0.020344	0.0221086	0.0272806	0.0192795	0.0257692	0.0175151	0.0182075	0.0171741	0.0206817	0.0197945	0.0173124	0.0172212	0.0212881
0.015907	0.0467389	0.0169986	0.0150657	0.0165847	0.0168571	0.0236415	0.0135753	0.0155423	0.0165916	0.0171295	0.0112396	0.0156948	0.0152535	0.0114001	0.0237793	0.015303	0.0136959	0.0127768	0.0428768	0.01616	0.0210418	0.0190992	0.0177293	0.0268829	0.0243222	0.0197437	0.0295145	0.026598	0.0264331	0.0204891	0.0156661	0.0187959	0.0156822	0.0138434	0.0164343	0.0176329	0.0190968	0.0169142	0.0205159	0.0170732	0.0180216	0.0158126	0.0151732	0.0174897	0.0137506	0.0185746	0.0165295	0.0197296	0.019306
0.0172655	0.0147601	0.0170032	0.0192599	0.0209385	0.0158797	0.0125613	0.0140554	0.0137833	0.0157093	0.0148236	0.0100701	0.0147127	0.0145126	0.0129111	0.0192707	0.0134031	0.0171976	0.0124125	0.0159096	0.0169679	0.018578	0.0161281	0.0151857	0.0206209	0.0197928	0.0188406	0.0239923	0.0201223	0.0200526	0.0198724	0.0181184	0.0242838	0.0176215	0.0123396	0.0179245	0.0197544	0.0221701	0.0176301	0.0202394	0.0156202	0.0165203	0.0205217	0.0151642	0.0158269	0.0139316	0.0260712	0.0198666	0.0220751	0.0186887
0.0943925	0.209958	0.0534394	0.121568	0.0665052	0.0229549	0.150524	0.0311144	0.042534	0.073556	0.0498541	0.0177691	0.0981114	0.0255587	0.0253439	0.156126	0.0441977	0.0537308	0.014846	0.28745	0.0744329	0.178303	0.058607	0.0295314	0.0539346	0.235774	0.0371517	0.133507	0.0365498	0.0748574	0.0536884	0.0416706	0.0584448	0.0382947	0.0344112	0.0494082	0.0431187	0.0523248	0.0393624	0.0282062	0.0427939	0.0358028	0.0375454	0.0412989	0.0374073	0.0404208	0.0338721	0.048163	0.0423314	0.0375754
0.0120183	0.0164021	0.01116	0.0157956	0.0123201	0.0108271	0.0150276	0.0093906	0.00958675	0.0131532	0.0134983	0.0124432	0.0163239	0.0101627	0.00900158	0.0197581	0.0104044	0.0175199	0.0121123	0.0272243	0.0168718	0.0213133	0.0119601	0.00991471	0.0133789	0.0310997	0.0112268	0.0120519	0.00993533	0.0208513	0.0129712	0.0172533	0.0196765	0.0174541	0.0138043	0.0192134	0.016571	0.0210481	0.0143225	0.0137488	0.0157387	0.0133243	0.0135827	0.0105533	0.0115657	0.0125381	0.0120403	0.0142303	0.01493	0.01604
0.0588412	0.0877714	0.0455029	0.0957289	0.0603908	0.0196537	0.0716606	0.0280705	0.0359383	0.0674141	0.0538342	0.0155468	0.075052	0.0224611	0.0220943	0.107261	0.0382001	0.0500389	0.0183394	0.135051	0.0773065	0.135427	0.0507742	0.0309556	0.0553642	0.220594	0.0375425	0.0984056	0.0389807	0.0997255	0.0406898	0.0367754	0.0427776	0.0355351	0.0252466	0.0352565	0.0379149	0.0386558	0.0307587	0.0274783	0.0334736	0.03132	0.0280147	0.0271701	0.0243604	0.0351334	0.0282071	0.0338788	0.03033	0.0323245
0.0344653	0.0602161	0.0264195	0.0266046	0.0254152	0.0156404	0.0440294	0.0221723	0.0180385	0.0238263	0.0247292	0.0137552	0.0228667	0.0151633	0.0125748	0.0386866	0.0227047	0.0164537	0.0112323	0.105198	0.0177779	0.0330746	0.0182713	0.0182345	0.0225924	0.0540027	0.0182051	0.0237823	0.0210873	0.0240212	0.0224529	0.0200136	0.0289217	0.017273	0.0198954	0.0221311	0.0236859	0.0256074	0.0181886	0.0215925	0.0255106	0.0260849	0.0246319	0.0261994	0.0256582	0.0262192	0.0288472	0.0280225	0.0235064	0.0224995
0.0251689	0.0430387	0.0230953	0.0291083	0.0236101	0.0143131	0.0367072	0.018646	0.0185986	0.0281131	0.0233286	0.0134204	0.0258449	0.0130131	0.0154763	0.0398927	0.0236563	0.0181356	0.0113441	0.0809258	0.0255831	0.0324944	0.0163164	0.0230264	0.0286757	0.0616505	0.01867	0.0212838	0.0234386	0.029292	0.0199059	0.0187071	0.0223167	0.0166833	0.0197194	0.0174563	0.0201437	0.0183342	0.0196012	0.0216011	0.0220362	0.028179	0.0239888	0.0227822	0.0225296	0.0260407	0.0267921	0.0241622	0.0199904	0.0245263
0.0232765	0.0440261	0.0181304	0.0218415	0.0171845	0.0148514	0.0277156	0.0125531	0.0158982	0.0201617	0.0169454	0.0187943	0.0169336	0.00976433	0.0140872	0.0218903	0.01691	0.0121713	0.0104698	0.053923	0.0150907	0.0191891	0.0145136	0.0146674	0.0200487	0.0308687	0.0172835	0.02469	0.0233146	0.0228557	0.0234499	0.0146857	0.020844	0.0137705	0.0147167	0.0146131	0.0205168	0.019447	0.0148845	0.0196651	0.0184799	0.0228334	0.0143243	0.0126195	0.0129123	0.0224259	0.0213049	0.0152664	0.0176387	0.0225478
0.0206387	0.0187665	0.0213182	0.0234498	0.0267149	0.0120114	0.0134632	0.0208898	0.0195047	0.0197696	0.019067	0.0137934	0.0173657	0.0126178	0.0133148	0.0163142	0.0210928	0.020305	0.0145853	0.0203677	0.0165359	0.0182777	0.0191936	0.0155984	0.0167279	0.0230357	0.0170787	0.0175896	0.0166011	0.0238788	0.0170706	0.0269081	0.032377	0.023876	0.0225148	0.0207054	0.0285189	0.0238166	0.0205993	0.020479	0.0228236	0.0240486	0.021071	0.0170947	0.0191594	0.0252036	0.0249529	0.0213792	0.0232755	0.0198836
0.0232921	0.0265165	0.022243	0.0242296	0.0228811	0.0129183	0.0209689	0.0176525	0.0163418	0.0239381	0.0236352	0.015364	0.0163786	0.0139045	0.0124164	0.027097	0.0186779	0.0163268	0.0109681	0.0492554	0.0192891	0.0256761	0.016556	0.0194061	0.0232448	0.0313215	0.0226663	0.0206579	0.0268509	0.0257224	0.0225379	0.0137763	0.021304	0.0135267	0.0172788	0.0147423	0.0203304	0.0157862	0.0167149	0.0213126	0.0200713	0.0244126	0.0204724	0.0187514	0.0214183	0.0249028	0.0291289	0.0225697	0.0163693	0.0250745
0.0437822	0.0505627	0.0439859	0.0585491	0.0459495	0.0290052	0.0478601	0.0362734	0.0353578	0.0472363	0.0335274	0.0139997	0.0414515	0.0252101	0.0184169	0.0621638	0.0467902	0.0314568	0.0169837	0.0696658	0.0396433	0.0699966	0.0502013	0.0278275	0.0454715	0.0894845	0.0434098	0.0665605	0.0412054	0.0649289	0.0499024	0.032447	0.0447421	0.0296945	0.0292867	0.0308125	0.0430782	0.0359142	0.0333899	0.0300979	0.0357787	0.0295686	0.0278087	0.0282168	0.0257952	0.0412761	0.0264992	0.0319641	0.0322981	0.0353162
0.0451569	0.0627914	0.025808	0.0339412	0.0282163	0.0137654	0.0417311	0.0234694	0.0226793	0.0253662	0.0181857	0.0139084	0.0227228	0.0180602	0.0121802	0.0300515	0.0349075	0.0146255	0.0118104	0.0524347	0.0131488	0.0275962	0.021865	0.0139735	0.0196755	0.0365099	0.0184076	0.0225991	0.0184528	0.0201618	0.0247097	0.036647	0.0430651	0.0189197	0.0274332	0.0311037	0.0401277	0.0398884	0.0312524	0.0269832	0.0349744	0.0262559	0.0399117	0.0404924	0.0345769	0.0420708	0.0358508	0.0394502	0.0420827	0.0370932
0.0265315	0.0496595	0.0207994	0.0250107	0.0233089	0.0104855	0.0410052	0.0162081	0.0150611	0.020696	0.0165072	0.011671	0.0226124	0.0134529	0.0139634	0.0226986	0.0221845	0.0131829	0.00916224	0.0465672	0.0139843	0.0230044	0.0179852	0.0135562	0.0174155	0.0289669	0.0172742	0.0170067	0.0176833	0.0185744	0.0178638	0.0226605	0.0278112	0.0136759	0.0190454	0.0242911	0.0246892	0.0246056	0.0204948	0.0204207	0.0250549	0.0219415	0.0224053	0.0260277	0.0244563	0.0268515	0.0227209	0.0252814	0.0284998	0.0249571
0.0153722	0.017405	0.0184565	0.0205118	0.0174194	0.0154441	0.0207215	0.0146901	0.0151144	0.0162968	0.0193769	0.0153138	0.0245762	0.0134711	0.0178246	0.0208591	0.0199613	0.0263751	0.0176826	0.0176797	0.02895	0.0222588	0.012886	0.0147296	0.0141156	0.0160992	0.0121838	0.0103241	0.0109714	0.0155702	0.0105465	0.0348076	0.0364614	0.0455784	0.0279248	0.0395247	0.0266088	0.0358632	0.0315218	0.027206	0.031661	0.0290841	0.0225169	0.0163622	0.0177963	0.0316878	0.0204396	0.0244165	0.0329703	0.0301177
0.0134077	0.0129229	0.01666	0.0174804	0.0163028	0.0174816	0.0115676	0.0173133	0.0158853	0.0177799	0.0156314	0.0124165	0.0110842	0.0136006	0.0109148	0.0115571	0.019584	0.0159623	0.012087	0.0123399	0.0116692	0.011434	0.0128173	0.0116334	0.0118584	0.0134186	0.0125592	0.0109595	0.0122583	0.0135971	0.0116086	0.0201935	0.0228162	0.0206195	0.0163629	0.0224335	0.0213721	0.0191573	0.0204795	0.0179023	0.0167138	0.020271	0.0219807	0.0184727	0.0200641	0.0269819	0.021357	0.023241	0.0236409	0.0197948
0.0566775	0.0709567	0.0353218	0.0437866	0.0367799	0.0158779	0.046389	0.0277295	0.0246496	0.0329878	0.0291345	0.0170782	0.0310581	0.0197322	0.0147126	0.0364583	0.0356387	0.0206172	0.0132907	0.0565167	0.0188973	0.0376112	0.0265782	0.017895	0.0208255	0.047325	0.0237285	0.0237054	0.0215768	0.0240492	0.0264976	0.0409151	0.0524743	0.0244787	0.0344676	0.0372479	0.0466373	0.0438917	0.0347926	0.0339904	0.0426626	0.0377571	0.0445839	0.045438	0.0393699	0.0485472	0.0452032	0.0455583	0.0498808	0.0429145
0.0276859	0.0433923	0.019156	0.0290124	0.0208224	0.0127765	0.0358164	0.0157909	0.0153211	0.0261477	0.0182607	0.00962795	0.0247868	0.0146265	0.00972504	0.0250937	0.0189377	0.0135644	0.00755841	0.0371176	0.0192693	0.0263044	0.0140154	0.0121587	0.0166391	0.0328327	0.0145088	0.0137518	0.0132729	0.0170952	0.0172054	0.0262052	0.0305428	0.0186751	0.0212381	0.0245399	0.0220956	0.0278009	0.0255014	0.0189017	0.0301309	0.0256782	0.0227745	0.0232092	0.0190261	0.0292547	0.0220534	0.0247059	0.0267313	0.0227266
0.0246944	0.0281959	0.021209	0.0300078	0.0215874	0.0112722	0.0179561	0.0146476	0.0130013	0.0211811	0.0148529	0.00685498	0.0190056	0.0103235	0.00789736	0.0239369	0.0193592	0.0124573	0.0069044	0.0200127	0.0174288	0.0252943	0.016284	0.010153	0.0152345	0.032849	0.015302	0.0138993	0.010957	0.0172395	0.0137717	0.028268	0.031212	0.0241463	0.0225476	0.0251826	0.0258146	0.0307506	0.0243378	0.0207551	0.0256151	0.0202257	0.0195305	0.0211297	0.0192777	0.0248946	0.0228936	0.0253913	0.0258862	0.0280334
0.0192501	0.0210132	0.0176723	0.0217424	0.0191171	0.0124317	0.0192715	0.0132799	0.0132602	0.0189655	0.0132842	0.0081322	0.0206729	0.0125939	0.00995775	0.0202183	0.0185324	0.0167221	0.0103818	0.0170828	0.0195261	0.023645	0.015754	0.0102221	0.0158609	0.0223212	0.0143377	0.0121795	0.011914	0.0159708	0.0137951	0.0347815	0.0360077	0.0296314	0.0310785	0.036193	0.0327806	0.0310611	0.0341364	0.0255712	0.0332232	0.0314972	0.0258522	0.0217564	0.0185808	0.0300974	0.0234741	0.0234107	0.0372434	0.0331342
0.0200252	0.0177251	0.0191653	0.0219066	0.0196735	0.0101308	0.0151022	0.0123835	0.0134754	0.0161608	0.0127752	0.00890627	0.0182046	0.010104	0.00978726	0.0184649	0.0159683	0.0162565	0.00872256	0.0179028	0.0182427	0.0187577	0.0124567	0.00890717	0.0120819	0.0206014	0.0120052	0.0108678	0.010111	0.0147872	0.0116168	0.0252984	0.0299528	0.0246694	0.028047	0.0375214	0.0237162	0.0299457	0.029216	0.0275491	0.0339413	0.0294042	0.0321844	0.0332606	0.0290632	0.0287312	0.032533	0.032168	0.0333483	0.031549
0.0353109	0.0249958	0.0450373	0.0463097	0.0492964	0.0214626	0.020845	0.0356706	0.0359974	0.0490058	0.0331909	0.0295907	0.0265829	0.0256842	0.0220442	0.034564	0.0412187	0.0194725	0.0227809	0.0295991	0.0219735	0.0353192	0.0266101	0.0272923	0.0345228	0.0479441	0.036077	0.0239754	0.0340495	0.0385535	0.0321476	0.0294517	0.0422255	0.0232116	0.0339891	0.0313701	0.0448777	0.0348806	0.0367798	0.0319031	0.0450231	0.0371002	0.0383185	0.0434944	0.0372558	0.0577823	0.0390226	0.046088	0.0450273	0.0419596
0.0180214	0.014454	0.0219339	0.0244217	0.0229066	0.012974	0.0172041	0.0220911	0.0188168	0.0235243	0.0202534	0.0148261	0.0176087	0.0177195	0.0160935	0.0199997	0.0242089	0.0184783	0.0112144	0.0174635	0.0193195	0.0180004	0.0179842	0.0127302	0.0193773	0.0263555	0.0188303	0.0177351	0.0192143	0.0216942	0.0194466	0.0243374	0.0260223	0.0216012	0.0189199	0.0233538	0.0239504	0.0228179	0.0198898	0.0217594	0.0255722	0.0249889	0.0231519	0.0230713	0.0193082	0.0272112	0.0192108	0.0211708	0.0210016	0.0190239
0.0149891	0.0108797	0.0160471	0.0153111	0.0157622	0.0116976	0.0162384	0.016707	0.0142368	0.0134499	0.0150955	0.0141706	0.0139275	0.0108643	0.0148198	0.0159246	0.0156722	0.0227621	0.0106211	0.015494	0.0182165	0.0151189	0.0116485	0.0111381	0.0119728	0.0160068	0.0113182	0.0111034	0.00982411	0.0129763	0.0113943	0.0278547	0.0284904	0.0290202	0.0185315	0.026676	0.0213583	0.0215304	0.021606	0.0190095	0.0252874	0.0256385	0.0163921	0.0136797	0.0141978	0.0248853	0.014846	0.0180557	0.0203014	0.0201892
0.0181463	0.0121841	0.0186007	0.0190613	0.0197225	0.0139129	0.0108139	0.0169493	0.0193534	0.0165905	0.0188369	0.0103579	0.0190332	0.0130254	0.0148509	0.0203603	0.0212371	0.0214889	0.0128206	0.0121173	0.0210661	0.0206071	0.0146974	0.0167948	0.0189732	0.0189548	0.0157742	0.0125801	0.0158956	0.0188832	0.0125652	0.0420357	0.039798	0.0375641	0.0226225	0.0302475	0.0329537	0.0376199	0.0274429	0.029859	0.0277255	0.0266386	0.0200744	0.0169523	0.0125737	0.0231141	0.0246278	0.0208415	0.0265751	0.0294123
0.0197338	0.0136388	0.0191864	0.0169881	0.0195938	0.0163826	0.0131663	0.0205104	0.0182707	0.0140312	0.0169015	0.0148648	0.015171	0.0193437	0.0169788	0.0152753	0.0209578	0.022073	0.0167559	0.0150434	0.0216279	0.0181949	0.0176354	0.0194738	0.0186493	0.0148615	0.0156482	0.0127483	0.017563	0.0165378	0.0133641	0.0350696	0.0339073	0.0292994	0.0283101	0.028963	0.035393	0.0329958	0.0280263	0.0327631	0.0337997	0.0296266	0.0228081	0.0183991	0.0135226	0.0250929	0.027586	0.0193331	0.0297212	0.0319258
0.0246522	0.0184292	0.0290482	0.0287342	0.0278629	0.0185512	0.0149976	0.0239133	0.0239254	0.0226572	0.0194039	0.014459	0.0223778	0.0196154	0.0156274	0.0246548	0.026528	0.0244266	0.019794	0.018287	0.0241175	0.0249615	0.0226984	0.025313	0.0238909	0.0201963	0.023353	0.0162369	0.0194704	0.0196615	0.0194919	0.0571674	0.057916	0.040769	0.0382103	0.0472146	0.056067	0.0510177	0.0415245	0.0504476	0.0466623	0.0445637	0.0371568	0.0252794	0.0234482	0.0279496	0.0389318	0.0319717	0.0415487	0.0580269
0.0178839	0.012227	0.0221729	0.0180072	0.0193456	0.0194823	0.0151784	0.0180714	0.0194635	0.0158491	0.0164753	0.0136507	0.0162021	0.0167685	0.0151156	0.0165764	0.0206779	0.0223397	0.0147494	0.0154705	0.0216331	0.0173953	0.0174397	0.0182577	0.0184409	0.0123985	0.0162372	0.0104913	0.0155586	0.01462	0.0164338	0.0398143	0.042013	0.0380106	0.0306602	0.0376921	0.0418736	0.0363731	0.0368608	0.043771	0.0416208	0.0370459	0.0262804	0.0191261	0.0170134	0.0283743	0.0316438	0.0242482	0.0372586	0.0407264
0.0105347	0.00958032	0.017918	0.018674	0.0170103	0.0156357	0.0112994	0.0145819	0.0164632	0.0136504	0.0132742	0.0108192	0.0156681	0.0123828	0.0155503	0.01843	0.0116014	0.0220697	0.0127821	0.0145374	0.0246197	0.0168415	0.0114068	0.014089	0.0177338	0.0141035	0.0149245	0.00996451	0.014661	0.0149391	0.0135556	0.0265977	0.0297888	0.0246596	0.015077	0.0185198	0.0213719	0.0265574	0.0174491	0.0131794	0.0180848	0.0161221	0.0119297	0.0100933	0.00844956	0.0156976	0.0148514	0.0124193	0.0190589	0.0169262
0.00939099	0.00791383	0.0126316	0.0118707	0.0121644	0.0158007	0.0083495	0.0120733	0.0120526	0.0101042	0.00996461	0.0107189	0.0080083	0.0134791	0.0126661	0.0109193	0.0156245	0.0179946	0.0137261	0.0130767	0.015954	0.0144408	0.0138048	0.0117645	0.0139537	0.0132098	0.0115089	0.0116393	0.0127976	0.010529	0.0135986	0.0164878	0.0199459	0.0160933	0.0102244	0.0142558	0.0176749	0.0200967	0.0108518	0.0127007	0.0131122	0.012085	0.0121507	0.0115121	0.00953118	0.0130525	0.0175767	0.0136486	0.0173228	0.0169387
0.0130062	0.0113747	0.0177739	0.0119608	0.0131925	0.0172316	0.0146367	0.0148021	0.0142981	0.0105491	0.0119541	0.0135748	0.0121157	0.0170999	0.0152245	0.015164	0.0142698	0.0181815	0.0167411	0.0112465	0.018913	0.0149131	0.0122187	0.0166127	0.0164906	0.0141663	0.0150011	0.0120088	0.0195579	0.0132898	0.0137037	0.0175483	0.0180729	0.0201331	0.00997974	0.0157804	0.0158269	0.0159013	0.0144805	0.0163158	0.0164669	0.0155347	0.0135338	0.0134342	0.010282	0.0154933	0.0136467	0.0120442	0.0162717	0.0149662
0.0141536	0.0107466	0.0142113	0.014187	0.0129783	0.0129142	0.0106159	0.0127153	0.0126571	0.014652	0.0111048	0.0103885	0.0141178	0.00984952	0.0120425	0.0168058	0.0123939	0.0160412	0.0108406	0.0140003	0.016319	0.0141271	0.00978667	0.0137601	0.0155673	0.0134311	0.0120203	0.0106725	0.0132989	0.0143387	0.0112523	0.0179059	0.0154803	0.0156984	0.0153111	0.0145163	0.0145483	0.0136858	0.0182929	0.0175338	0.0166934	0.0159603	0.0124571	0.0145127	0.010007	0.015633	0.0135341	0.0135513	0.0134604	0.0150738
0.0283896	0.0238534	0.0281453	0.0274483	0.0263506	0.0132912	0.0168514	0.0264769	0.0187678	0.0285649	0.0217492	0.0125971	0.0185595	0.0160891	0.0129133	0.0213098	0.02852	0.0146014	0.0113825	0.0215804	0.0167153	0.0222366	0.0208391	0.0139018	0.0205832	0.0263961	0.0207758	0.017391	0.0190728	0.0200339	0.0194411	0.032738	0.0429687	0.0203696	0.0271382	0.0274679	0.0364525	0.0302532	0.0334388	0.0290872	0.0308589	0.0312893	0.031172	0.0297072	0.0307475	0.0399029	0.0329761	0.036151	0.0342417	0.0379204
0.0380021	0.0359089	0.0232561	0.0327945	0.0285669	0.0165091	0.0238483	0.0257501	0.0175215	0.0335602	0.0194771	0.0173497	0.0241194	0.0168083	0.0213629	0.0224293	0.0304241	0.016934	0.0122176	0.0284741	0.0147167	0.0202854	0.0181801	0.0145738	0.0158191	0.031268	0.0186185	0.0137269	0.0158031	0.0190867	0.0215194	0.0377883	0.04506	0.0172657	0.0364975	0.0297944	0.0454132	0.0352452	0.035212	0.0442243	0.0388698	0.0397368	0.0577022	0.0525583	0.05139	0.0500322	0.0602883	0.0541338	0.0528707	0.0553369
0.034209	0.0304979	0.0334497	0.0376496	0.0368277	0.0179092	0.0293628	0.0294495	0.0277666	0.0289159	0.0226635	0.0140194	0.035153	0.0198501	0.0188498	0.0332931	0.0300982	0.0363924	0.0138184	0.0264425	0.0377903	0.0371119	0.0303385	0.0169889	0.029813	0.0334367	0.0282738	0.02951	0.0235116	0.0275959	0.0272717	0.0336414	0.0357855	0.0300049	0.0268985	0.0311248	0.0279733	0.0293359	0.0248098	0.0175884	0.0269528	0.0263793	0.0200657	0.0195055	0.018671	0.0275354	0.0184897	0.0230087	0.0321751	0.0222519
0.0105758	0.00862975	0.00967771	0.00923537	0.00915985	0.01033	0.0101473	0.0114216	0.0103817	0.00981858	0.0089055	0.00938827	0.00849918	0.00932152	0.0102935	0.00966857	0.0108222	0.0107416	0.00843875	0.0103872	0.0105626	0.0110592	0.00994242	0.0101507	0.00999438	0.0107219	0.00948436	0.0112302	0.00954892	0.00894706	0.010417	0.0151859	0.0165803	0.011829	0.00981927	0.0123145	0.0122746	0.0145478	0.0109829	0.00881683	0.0127584	0.0075713	0.00815871	0.00884062	0.00837678	0.0125004	0.00861474	0.0114981	0.0116894	0.0106702
0.0114714	0.00774402	0.0124863	0.0108034	0.0113127	0.00974432	0.00701003	0.011032	0.0119897	0.0105327	0.0100957	0.00760503	0.0098362	0.00966591	0.0131252	0.0118436	0.0121278	0.0146494	0.00965338	0.00906548	0.0143155	0.0140009	0.0107104	0.0104683	0.0105486	0.0133417	0.00885734	0.00883667	0.00792564	0.00875461	0.00889696	0.0208253	0.0245084	0.0194339	0.00954143	0.0158348	0.0194754	0.0222273	0.0120197	0.00994952	0.014715	0.0118224	0.00742124	0.00897224	0.00597769	0.00888977	0.0104972	0.00986877	0.0107782	0.0140491
0.00755126	0.00925318	0.00867587	0.011562	0.00854181	0.00670062	0.0115909	0.00693952	0.0104432	0.0105175	0.00836099	0.00728353	0.00898118	0.00749042	0.00791921	0.0090203	0.00747471	0.0081633	0.00749613	0.00809003	0.00790362	0.0106264	0.0069004	0.00742323	0.00734709	0.00828571	0.00691158	0.00714478	0.00799656	0.00811061	0.00667727	0.0105529	0.0105248	0.0139833	0.0145664	0.0124866	0.0103138	0.0121493	0.013023	0.0150572	0.0128084	0.0109044	0.0122458	0.0129393	0.0107432	0.0102176	0.00980329	0.0130392	0.0135518	0.0146874
0.00917684	0.00777767	0.0111768	0.00985913	0.00912666	0.00839992	0.00988424	0.00852793	0.0092899	0.00940784	0.00636469	0.00626809	0.012093	0.01028	0.00830348	0.0105567	0.0094051	0.0117864	0.00884745	0.0103532	0.0131881	0.0113741	0.00826855	0.00765926	0.0109879	0.0103523	0.00844908	0.00675343	0.00783836	0.00928895	0.0064426	0.0133509	0.0131298	0.0156758	0.0116455	0.0104426	0.0120579	0.0111798	0.0126305	0.0115822	0.0121419	0.0132837	0.0122897	0.0118069	0.0103446	0.0103385	0.0120318	0.0111065	0.0168474	0.0119008
0.033254	0.0531066	0.0232691	0.0277667	0.0263869	0.0141713	0.0360438	0.0182808	0.0183384	0.0222793	0.0176108	0.0103625	0.0279714	0.0119711	0.00962244	0.0251067	0.0259452	0.0120644	0.00949037	0.0537106	0.0177684	0.028956	0.0178492	0.0132799	0.0189522	0.0312913	0.016069	0.0170612	0.01584	0.0206623	0.0188148	0.0316505	0.0378411	0.0259797	0.0267566	0.0325914	0.0334705	0.0327254	0.0272841	0.0222473	0.0320169	0.0259076	0.0283174	0.0286715	0.0274231	0.0337047	0.0294097	0.0336517	0.0331288	0.0291049
0.02888	0.0419792	0.0163995	0.017582	0.0171067	0.010426	0.0379253	0.0149049	0.0131126	0.0158133	0.0121042	0.012131	0.0167312	0.0123056	0.0115888	0.0176204	0.0166297	0.0112656	0.0110633	0.0403389	0.0117509	0.0195736	0.0116214	0.0119496	0.0128091	0.0238259	0.0115879	0.0144743	0.0109687	0.013686	0.0134328	0.0262957	0.0284218	0.0198952	0.02133	0.0214741	0.0262638	0.022881	0.0193462	0.0191961	0.0216801	0.0208803	0.0261492	0.0229883	0.0228283	0.0260924	0.0247362	0.0244325	0.0242254	0.021261
0.0151037	0.0148527	0.0183386	0.0159212	0.014451	0.0186069	0.0145037	0.0166497	0.013757	0.0157652	0.0137586	0.0129262	0.0184122	0.0120141	0.0146842	0.0203819	0.0187064	0.0201542	0.0142018	0.0155387	0.021465	0.0171858	0.0137762	0.01125	0.0110996	0.0153839	0.0121835	0.0117237	0.0105372	0.0123056	0.0102028	0.0257179	0.0294501	0.0353754	0.0218773	0.0339599	0.0247759	0.030236	0.0191945	0.022221	0.0258532	0.0210424	0.0200449	0.0143943	0.0166318	0.0233499	0.0163348	0.0191355	0.0220439	0.0228039
0.0173977	0.0133358	0.0227995	0.0193876	0.0210725	0.0141408	0.012216	0.0225952	0.0169452	0.0191759	0.015959	0.0132372	0.0126913	0.0141287	0.0129613	0.0149213	0.0190253	0.0139502	0.0157472	0.0160581	0.0145548	0.0134545	0.014581	0.0131957	0.0162573	0.0195954	0.0149798	0.0137551	0.0178999	0.0181877	0.0157996	0.0177425	0.0219615	0.0155742	0.0146545	0.0138985	0.0232418	0.018634	0.0188043	0.0194082	0.0170942	0.0219993	0.0240401	0.0203953	0.0218281	0.0247021	0.0180816	0.0231121	0.0209934	0.018912
0.0621701	0.0933175	0.0411213	0.0496995	0.0455355	0.0167078	0.0519119	0.0313558	0.0255776	0.0370397	0.0284218	0.0136674	0.0346612	0.0220046	0.0154881	0.0415037	0.0437284	0.021306	0.0160396	0.0707109	0.0220533	0.0491699	0.0269779	0.0192408	0.0253283	0.0577505	0.028766	0.0257405	0.0228602	0.0276067	0.0285216	0.0584869	0.0726412	0.0296328	0.0526533	0.0531594	0.0605	0.0585409	0.0503185	0.0359835	0.0583177	0.0436778	0.0530991	0.0516764	0.0521463	0.0581579	0.0544182	0.0559301	0.0527778	0.0494912
0.0313282	0.0563796	0.019779	0.0241804	0.0177574	0.00887278	0.0512479	0.0140365	0.0144188	0.0195184	0.019378	0.00911497	0.0282881	0.0120757	0.0108902	0.0271438	0.019311	0.0163122	0.00902474	0.0373948	0.0197729	0.0291077	0.0156071	0.0108615	0.0164673	0.0311732	0.0158138	0.0145437	0.0136901	0.016555	0.0154811	0.0303894	0.034518	0.0200321	0.0252214	0.0253476	0.0251444	0.0280765	0.0234134	0.0178395	0.0302892	0.0230902	0.0208657	0.022223	0.0204433	0.0208941	0.0250194	0.0234951	0.0257854	0.0214224
0.0370298	0.0406195	0.0222223	0.0430429	0.0270278	0.0116211	0.0411444	0.0152655	0.0170336	0.0232791	0.0216924	0.00864084	0.0390214	0.0144989	0.0113431	0.0255073	0.0231342	0.0179005	0.010409	0.0332671	0.0193684	0.0248315	0.0176625	0.0150151	0.0211263	0.0300815	0.0183217	0.0163946	0.015187	0.020544	0.018725	0.0379819	0.0404784	0.0310016	0.0331541	0.0357152	0.0302831	0.0361236	0.0297292	0.0260223	0.0367332	0.0289438	0.0221065	0.0229096	0.0207849	0.0295886	0.0233959	0.0261602	0.0347307	0.0277626
0.0141116	0.0134805	0.0178593	0.0177443	0.0136111	0.0129926	0.0159422	0.0131226	0.0134205	0.0169163	0.0115605	0.00900615	0.0251921	0.0113912	0.0102315	0.0228099	0.0150763	0.017081	0.00901763	0.0226349	0.0184788	0.0236729	0.0122981	0.0118104	0.0162393	0.0200271	0.0126446	0.0101388	0.0100379	0.016443	0.011315	0.0287687	0.0305869	0.0319796	0.0222253	0.0353648	0.0241287	0.0308254	0.0220685	0.0228853	0.0261323	0.0230839	0.0157623	0.0129808	0.0158952	0.0193952	0.0189135	0.0195945	0.0340562	0.0261113
0.0236056	0.0169796	0.0251944	0.0263134	0.0261813	0.0188931	0.0218039	0.0183763	0.0213719	0.023675	0.0187646	0.0101859	0.0275426	0.0154117	0.0128968	0.0310919	0.0248837	0.0216591	0.01291	0.0293517	0.0253147	0.0358543	0.0170718	0.0144638	0.0247777	0.0312935	0.0208506	0.0133786	0.0186599	0.0248856	0.0162788	0.0359794	0.0460054	0.0443865	0.0393758	0.0603818	0.0380625	0.0465688	0.0426227	0.0395425	0.0514221	0.0360741	0.036092	0.0307142	0.0331164	0.0384089	0.033611	0.0425727	0.0527541	0.0473989
0.0447605	0.0300505	0.0578414	0.0603953	0.0648646	0.0281583	0.025859	0.0441866	0.0438563	0.0597354	0.0392264	0.0203991	0.0308979	0.0317004	0.022522	0.043995	0.0552837	0.0264468	0.0229823	0.032974	0.0290618	0.0472687	0.0402117	0.0336663	0.0461163	0.0635914	0.0475163	0.0363234	0.0489758	0.0532741	0.0449262	0.037935	0.0490683	0.0211425	0.0345337	0.035924	0.0489177	0.0397405	0.0408614	0.0393931	0.0451708	0.0434319	0.0404478	0.0437201	0.0410662	0.0546294	0.0422987	0.0495451	0.0480541	0.0470912
0.023294	0.0181283	0.0232472	0.0309074	0.0282367	0.0160261	0.0164587	0.0248779	0.0172543	0.0258294	0.018448	0.0236205	0.0110532	0.018299	0.0195249	0.0184378	0.0226044	0.0161256	0.0161393	0.017321	0.017081	0.0168274	0.0216312	0.0151772	0.0192738	0.0273408	0.0210986	0.0163746	0.0197074	0.020235	0.0210121	0.0200048	0.0269913	0.0155583	0.0235905	0.0229075	0.02961	0.0233077	0.0223255	0.0190628	0.022378	0.0244219	0.0263286	0.0257578	0.0228984	0.0323792	0.0298378	0.0262277	0.0214203	0.0240059
0.013672	0.0102656	0.0170679	0.0204922	0.0199379	0.0140706	0.0150011	0.0169724	0.0176131	0.0180777	0.0163688	0.0199618	0.0179818	0.0132323	0.0230065	0.0186102	0.0194781	0.0280399	0.0165248	0.0153564	0.0240314	0.0202238	0.014276	0.0167262	0.0163909	0.0197215	0.0159844	0.0137558	0.016411	0.020467	0.0130224	0.0214651	0.024753	0.027625	0.0176915	0.0218371	0.0222008	0.0226298	0.0213434	0.0212972	0.0236177	0.0218456	0.0227522	0.0189285	0.0198286	0.0248635	0.019825	0.0209647	0.024098	0.0205646
0.0156206	0.0103335	0.0152756	0.0168134	0.0174747	0.015244	0.00982248	0.0144134	0.0192379	0.0162058	0.0144331	0.00931892	0.0161266	0.0147362	0.013097	0.017777	0.0147144	0.0198784	0.0127295	0.0150447	0.0223748	0.0191758	0.0136893	0.017031	0.0168288	0.0169366	0.013837	0.0141992	0.0140057	0.0159301	0.0130259	0.0305168	0.034376	0.0272513	0.0169001	0.0245653	0.0248442	0.0272595	0.0222816	0.0217498	0.0222969	0.0177027	0.0147884	0.0141622	0.0111861	0.0176152	0.0175055	0.0149717	0.0196002	0.021561
0.0148758	0.0122242	0.0145335	0.0206959	0.0181917	0.0170548	0.0106406	0.0139484	0.0147713	0.0163351	0.0159162	0.011931	0.0125747	0.0140786	0.0139175	0.0152556	0.0160303	0.0207918	0.013307	0.0117521	0.0208156	0.0169877	0.0115898	0.0173381	0.0195083	0.0139211	0.0127204	0.00859796	0.0162686	0.0159588	0.0113183	0.0365156	0.0356252	0.0268017	0.0220173	0.0294483	0.0344005	0.0322263	0.0296592	0.031175	0.0308727	0.0300251	0.0274012	0.0181382	0.0156414	0.0229037	0.0339575	0.0202876	0.0273124	0.032464
0.0187797	0.0187882	0.0215679	0.0204307	0.0240777	0.0157548	0.0180252	0.0187494	0.0197349	0.0160118	0.0173863	0.0133344	0.0167866	0.0194162	0.0155883	0.0155201	0.0248368	0.0228504	0.0186653	0.0135409	0.0220094	0.0166311	0.0190873	0.0226893	0.020368	0.0167263	0.0196121	0.0128864	0.0209026	0.0154761	0.0173192	0.0550505	0.0490679	0.0442897	0.0357253	0.0454023	0.0473688	0.0424579	0.0396764	0.0489987	0.0456842	0.0414527	0.0354399	0.0250706	0.0245166	0.0307271	0.0422775	0.0323032	0.0387813	0.0512917
0.0181544	0.0124436	0.017843	0.0187364	0.0179848	0.0147787	0.0108708	0.0162778	0.0182875	0.0146289	0.0139029	0.0117686	0.0123476	0.0150436	0.0161776	0.016686	0.0197228	0.0200847	0.0135765	0.011691	0.0216348	0.0176458	0.0143344	0.0181064	0.0193869	0.0137472	0.0157005	0.0110941	0.0174126	0.016037	0.0159007	0.0417836	0.0389817	0.0370297	0.0288092	0.0355684	0.0372682	0.0364786	0.0349355	0.0362774	0.0419512	0.0386115	0.0266076	0.0231582	0.015474	0.0273919	0.0323683	0.0199686	0.0321652	0.0359717
[truncated: 11 more rows]
[truncated: 404 more columns]
