# Supplementary material for: A synergistic workspace for human consciousness revealed by Integrated Information Decomposition
Source: eLife. 2024 Jul 18;12:RP88173. doi: 10.7554/eLife.88173 (PMC11257694; doi:10.7554/eLife.88173)
Supplement: Figure 4—source data 1. [file elife-88173-fig4-data1.xlsx]

## Sheet: PhiR_Ppfl_Awake_vs_Deep_S454
0
7.4234e-05
-0.000505921
0
-0.000543873
-0.0015226
9.9524e-05
0.000452095
-0.000682364
0
-0.000771539
-0.000122394
0.000133892
0.00011724
-0.000266787
0
1.62731e-05
-0.00103328
0
-0.000313801
0.000117073
-0.00042211
0.000298354
-0.000136454
0.00075445
-0.000165344
3.81087e-05
0.000101746
0.000223813
0.000360668
3.1471e-05
-0.0005066
-0.000751103
0.000108223
0
-0.00021253
0
-2.59212e-05
-0.00209197
-0.00118184
-0.00101836
-0.00211263
-0.00230095
-0.000856771
-0.00139705
-0.000476987
-0.000606311
-0.000697874
-0.000476043
0.000673792
-0.00170008
-0.00107107
-0.00107203
0.000714813
0.00110178
-0.000701488
-0.000480875
-0.000259773
-0.00027987
-0.00035012
0.000367391
0.00023689
0.00101809
0.000292793
-0.000509677
-0.000504489
-1.98857e-05
0.00016119
0.000306009
0.000260618
-6.2167e-05
0.000176833
0.00025406
0.000922165
0.000460076
0.00119353
0.00067305
0.000555203
0
0.000602362
0.000276503
0.000561998
0.00146869
0.000449772
-0.000226449
0.000396089
0.000265566
0.000954222
0.000683611
0.00123119
0.000259142
-0.00189602
0
-0.00209653
-0.000141417
7.93227e-06
-0.000623684
-0.00288201
1.74093e-05
0
-9.84863e-06
-0.000333852
0.00105399
-0.0013606
0.000346698
0.00122945
0.000108563
0.000317731
2.04318e-05
-0.000942678
0.000465076
0.000483458
-0.00109186
0.000188319
0.000373278
0.000737471
0.00120847
-0.000295319
0
0.000123212
0.000228074
0.000231297
0.000459813
0.000329813
0
1.27075e-05
0.000711071
0
-0.000303215
-0.000404138
0.000921721
0.00025283
-0.000538967
0
0.000101343
0.000629837
0.000168977
0.000423521
0.000309003
0.00065824
0.00219355
0.000229888
0.000320137
-7.44839e-05
0.000118654
0.000659767
0.000522555
0.00194449
-0.000707069
7.56654e-05
-0.00135473
-0.000377219
-0.000335528
-0.00060367
0.000174622
0.000123289
0
0.000429918
8.00459e-05
-0.00100043
-0.000917483
-0.00208011
-7.43354e-05
-0.00232794
-0.00024712
0.000493888
0.000365912
-0.00251697
-5.92017e-06
0.000199264
-0.000250994
0.000585993
-0.000171021
0.00117438
0.000518192
-0.000425883
0.00172788
0.00023242
-8.18607e-05
-5.2969e-05
0.0013275
-0.000475396
0.000388222
0.000375618
0.000259133
-0.00124438
-0.000305009
3.50135e-05
0.00119587
-0.00032103
0.000194526
-0.00199148
0.000215923
0.000676478
-0.00120459
-0.00377416
0.000484564
0.000117932
-0.000374162
0.000794749
0.000285979
9.04819e-05
-0.000240204
-0.0017046
-0.000385954
-0.000440143
-3.86767e-05
0.0001874
0
-0.000723667
-0.000345347
-0.000438753
-5.80709e-05
-0.000153522
-0.000234886
-0.000434845
9.80512e-05
-0.00017707
7.56553e-05
-0.000556546
-0.000197291
0
-0.00118462
-0.000270713
0.000629617
8.10049e-05
0.000231113
0.000116249
-4.47793e-05
0.00012548
-0.000798378
0
-0.00216181
-5.43473e-05
0
0
-0.000409164
0.000235914
-9.40951e-05
-0.000492716
-0.000346559
-0.000631277
-0.000146099
-0.000285284
-0.00182761
-0.00108659
-0.000355306
-0.000797701
-0.000249076
-7.44359e-06
-0.000641645
-0.00155784
-0.000559163
-0.000121413
-0.000467501
-0.000285701
-0.000198122
-6.06877e-05
0.000225392
0.00091638
-7.79358e-05
0.00011146
0.000255247
0.000325974
-0.00124676
-0.000759548
7.59347e-05
-0.000585635
-5.12173e-06
0.000325863
0.00118221
0.000265685
-0.000344154
0.000374977
0.000174685
-7.40202e-05
0.00142862
0.000449556
0.000584085
0.00127593
0.000508779
0.000654193
9.06811e-05
0
6.33971e-05
0
-5.91101e-05
-0.000402029
-0.000128136
0.00136429
0.00108795
-0.000197132
0.00252574
-0.0001119
0.000389038
-0.000215839
-0.000110072
-0.000264366
-0.00107348
-0.000409972
0.000494631
-0.000412998
0.000255
0.000470766
0.000229622
1.23826e-05
1.66507e-05
-0.00332585
0.000670701
0.00106498
-0.000399257
7.55329e-05
0.000505121
0.0012787
-0.000166182
0.000101023
-0.000518965
-0.000467541
0.00039756
-3.26138e-05
6.41462e-05
0.000992544
0.000214448
-0.00087623
0.00101602
-1.95877e-05
0.000397813
0.000560918
0.000648009
0.000211795
8.21276e-05
0.00059691
0.000676307
0.0011111
-0.000286669
0.0012693
0.000547596
0.000678533
0.00041113
0.000436942
0.000797198
0.000206258
-0.000583451
7.60424e-06
0.000707665
0.0016271
0.00207399
0.00158919
0.00114676
0.001993
-0.000151882
0.00112192
0.00172781
0.000359319
0.00231203
-0.000110826
0.000254108
0.000615556
0.000780886
0.00230363
0.00380636
5.83145e-05
-0.00051385
-0.000469366
0.000337521
-0.000670664
0.000160107
-0.00118769
0
0
0.000148706
0.000555046
9.92932e-05
0.000290272
0.00054957
0.000141468
0.00172517
0.000724059
0.000287563
-0.000837257
0.000916703
-0.00105382
0.000504202
0.000540365
0.000868325
0.000884781
0.00141404
0.0033377
-0.000742659
-8.27177e-05
0.000638651
9.39819e-05
6.70005e-05
0.000227051
-0.00233833
-0.000750871
0.00112801
0.000469325
-0.00150754
0.000739628
0
0.000262308
0.000108089
-0.00110078
9.55491e-05
0.000400435
0
-4.60167e-05
-0.000414686
-0.000348501
0
0
-0.000984092
-0.00314782
-0.000393848
0.000404508
0.000136285
-0.000222303
-0.000343387
-0.000493194
-0.000117314
0
0.000312478
0.000323497
-0.000121301
0.000149338
0.00021188
-0.000104322
0.000111705
-2.78992e-05
-0.000623143
9.76752e-05
0
0
-0.000291786
-0.000678995
-0.000569504
-0.000230448
0
-0.000347469
-0.00163656
0.00013109
-3.3674e-05
-8.55572e-05
-0.00013402
0
-0.000131592
-0.000121848
0.000407076
-0.000360635
0.000283351
0.000785733
0.000224244
8.40909e-05

## Sheet: PhiR_Ppfl_Recovery_vs_Deep_S454
-0.000210955
-0.00015424
0.000263593
0
-0.000650933
-3.81413e-05
0.000234818
0.000296013
4.25801e-05
-3.40447e-05
0.000193928
0.000260872
0.000137391
0.000262544
0.000346387
0.000824387
0.000938222
0.002526
0
0.000243305
0.00123237
-5.14753e-05
0.000388589
0.000396851
0.00156923
0.00185497
0.000510568
0.00171344
0.000206148
0.000507835
0.00121306
0.000835836
-0.000100878
0.000457643
0.000564276
0.00123102
0.000694211
0.000823412
-3.61339e-05
0.000172398
0.000854355
0.00251915
0.00089595
0.000177874
0.000375316
0.00125342
0.000657441
0.000380099
0.00218221
0.00214323
0.000115975
-0.000104529
0.00175838
0.00127259
0.00227652
-0.000149071
-0.000127241
-0.000409135
-0.000210213
9.05555e-05
0.000268311
-3.16335e-05
0.00105453
0.000196058
-0.000393447
0.000889847
7.12023e-05
0.000551366
0.00181797
0.000981978
0.00134062
0.000874031
0.000820129
0.00203806
0.00165099
0.00117562
0.000514589
0.00246619
0.00125302
0.000923904
0.00244739
0.000679191
0.000885169
-7.3207e-05
-0.000212002
0.000841077
0.00193772
0.00114661
0.00149455
0.00157771
0.00172787
0.00119013
-0.000309293
0.00113291
-4.6721e-05
0.0015814
0.000403932
0.000310894
0.000508352
0.000732837
0.000268121
0.000758854
0.000982267
0.000707918
0.000588889
0.00255719
0.00220051
0.0020539
0.000814448
0.00309314
0.000240851
0.000396481
0.000371647
0
0.000778554
4.98794e-05
0.000983279
0.000565366
-0.000193491
0.000280649
0.000143737
0.000896113
0.0014406
0.000114059
0.000113297
-7.71259e-05
0.00233089
0.000457946
0.00148679
0.00351246
0.00170806
0.00144876
0.00109548
0.000385564
0.00028343
0.000408177
0.000406199
0.00175572
0.0014105
0.00180452
0.00197075
2.65227e-05
0.000872163
0.000604988
0.0011917
7.41394e-05
0.000346234
0.00400848
-0.000408496
-0.00102557
5.14478e-05
-0.000175467
0
0.00161898
0.0021476
0.0011181
0.00201246
0.00280609
5.25224e-05
-0.000606975
0.000721524
-0.00144326
0.000182405
0.00103377
0.00153985
0.000202025
-0.000218713
-0.000198237
0
-0.000296514
0.000335176
7.41306e-05
0.000177851
0.000501459
0.00085063
0.000465421
0.00134046
0.000201463
-0.000257077
0.00066319
0.00334133
0.000207557
-0.000863047
0.00117249
0.00208418
0.00064454
0.0023774
0.000719235
0.000536721
-3.03323e-05
0.000221387
0.000858554
0.000557452
0.000870087
-0.000756973
-0.00180769
0.00161587
0.00136112
-0.000341076
0.00050787
0.000881678
0.00113575
0.000182683
-8.81097e-05
0.000476742
-0.000457918
-0.000116043
0.000645158
-0.000162575
-0.000399805
-0.000207512
0.000564435
0.000121719
0.000472265
0.00011972
0.000190989
-0.00019641
0.000152407
0.00111961
0.000572334
0.000302605
0.000326232
-0.000191541
0.00177335
0.0030082
-0.000330933
0.00318516
0.000880649
0.000280658
0.00135878
0.000380315
0.00149796
0.000712047
0.00328749
0.000812481
0.00180293
0.000751767
0.000719706
0.00357871
0.00134449
0.00128519
0.00125687
0.00250165
0.00230078
0.000735452
0.00211769
0.00122247
0.00167817
0.000546157
0.00073401
0.00254121
0.00210123
0.000788322
0.000659572
0.00230094
0.000615075
0.00156948
0.000735498
0
0.000636818
0.000291181
4.49285e-05
0.00100083
0.00227855
0.000824704
0.000678546
0.000576174
-0.000238908
0.000792647
0.000211792
0.000991088
0.000532437
0.000451724
0.00183942
0.000871599
0.00117695
9.0788e-05
0.00125102
0.000617027
0.0029471
0.00115407
0.00217822
0.00301523
0.00236174
0.00141674
0.00014678
0.000550352
0.000174324
0.000246771
0.0004821
0.000736139
0.000135447
0.00270819
0.000121852
0.0022002
0.0013724
0.00128825
0.0014558
-0.000130143
7.42807e-05
0.00201879
0.000104548
0.000740258
0.000907615
0.00108028
0.000516746
0.00046115
0.00110508
0.00115686
0.000568621
0.00257857
0.000791395
0.00216856
0.00232853
0.00149829
0.00102255
-0.000378151
0.000319243
0.000663155
0.000115131
-4.21251e-05
0.00105381
0.000750876
-0.000307296
0.000767615
-7.78862e-05
0.000181397
0.00102819
0.00100609
0.0012271
0.000508423
0.000503016
0.000161476
0.00220047
0.00101414
0.000624103
0.00219051
-0.000269098
0.000335147
0.000395514
0.000101061
0.00032891
0
-9.18657e-05
0.000423237
0.00224803
0.00221669
0.00126289
0.000727898
0.00288173
-0.000576603
0.000594728
0.00106657
0.00115306
0.00155184
0.00152779
0.000942767
0.000140868
0.00120927
0.00184522
0.00329783
0.000353516
0.000195757
-0.00115856
0.000139353
0.00211224
0.000159339
-0.000183178
0.000327794
0.00114018
0.000547772
0.00209984
0.00109833
0.00100626
0.000162507
8.21189e-05
0.000205287
0.000996962
0.00105832
-0.000109747
0.00040725
-0.00027456
0.000475402
0.000716193
0.000192167
9.42532e-05
0.00104656
0.00247984
-0.000655672
0.00231042
0.000239001
0.000720032
0.000118887
9.20106e-06
0.00102217
-6.01244e-06
0.00133928
0.00170969
-8.12509e-05
0.00159739
0.000117451
0
0.000893185
0.000242144
0.000240716
0
-0.000234173
0.00116494
1.4249e-06
0.000537508
0.000139855
0.000779505
0.000334388
0.000387553
0.000466951
0.000893664
0.000401585
0.000530903
0.000391825
0.000926121
0
0.000532592
0.000191854
0.000879984
1.82919e-05
0.000214604
-0.000132565
0.000540011
0.000398871
0.000336774
0.000133882
0
0.000245577
0.000269647
0.000885646
0.000103875
-0.000246929
0.000935633
0.000988445
0.000553887
3.38222e-05
0.000681564
0.000630075
0.00148118
0.00173429
-0.00012103
0.000504291
0.000159323
0.000734286
0.000125626
0.000704845
0.000492686
-1.07097e-05
0

## Sheet: PhiR_Awake_vs_DOC_S454
0.000185385
0.00182646
-0.00687726
-0.00214936
-0.00570818
-0.0036245
0.000961033
-0.00306414
-0.00304792
-0.00419093
-0.00445972
-0.000689907
0.000421658
-0.00405008
-0.000621903
-0.00184319
-0.00716906
-0.00225253
-0.00437085
-0.00106841
-0.00263207
-0.00230019
-0.00242793
-0.00452355
-0.00254734
-0.00134021
-0.00642666
-0.000720005
-0.00652607
-0.00187
0.000530249
-0.00783661
-0.00872432
-0.000761972
-0.00328058
-0.00238084
-0.00040754
-0.0022804
-0.00949182
-0.010727
-0.0114908
-0.00968716
-0.00670858
-0.00490647
-0.00384934
-0.00425278
-0.00188088
-0.00483394
-0.000947875
0.00128877
-0.00308517
-0.00109294
0.00105779
-0.000553758
0.00101021
0.00106901
-0.000851606
0.00090127
-0.000528512
-6.30502e-05
0.000437783
-0.000162729
-0.000109809
0
2.90479e-05
-0.000308995
0
-0.000448416
1.97238e-05
0.000339583
-0.000612595
0.000272685
0.00150552
-0.00316738
0.00182199
1.49145e-05
0.000253492
0.00129112
-0.000716572
0.00166639
0.000569713
-0.000884623
-6.6285e-05
-0.000315505
-0.000623493
0.000637836
0.000605069
0.000644295
0.0018751
-0.000349066
0.0016815
-0.0114893
-0.000144914
-0.00656382
-0.00264968
2.16688e-05
0.000322313
-0.00569229
-0.0011468
-0.0020894
-0.00137623
-0.00308364
-0.000533337
-0.00684625
-0.00075677
0.00188191
-0.00322452
-0.00301763
-0.000279395
0.000948268
0.00120026
0.00363747
-0.000794174
0.00101208
0.00224372
0.000796245
0.00286681
-0.000887392
0
0
0.000732618
-0.000368151
0.000364979
-0.000858684
3.99172e-07
0.000470238
-0.00192873
-0.00265833
-0.00211429
-0.00522316
-0.00171538
-0.00152886
-0.00153964
0.000347596
-0.00292688
0.00101349
-0.000278327
-0.000273017
0.000102984
-0.000160872
0.000489315
0.000262554
-1.3703e-05
0
-8.35242e-05
0
-0.00152916
0.000604824
-0.000309725
-0.000994002
-0.000679482
-0.0018849
-0.00101674
-0.00114664
-0.000509775
-0.00104577
-0.000361659
0.000442353
-0.0012088
-0.00909083
-0.00297235
-0.00767485
-0.00340566
-0.00692201
-0.00510269
0.0010593
0.00049219
-0.00424163
0.00209467
8.84725e-05
-0.00293624
0.000104929
-0.00305168
0.000915014
-0.000555449
-0.00362474
0.000154502
-0.000948022
-0.000139783
0.000749675
0.00177118
-0.00262434
-0.00031172
0.00168034
-0.00178481
-0.000495848
0.00051998
0.00081832
0.00342242
-0.00390018
-0.00385139
-0.00634073
-0.00466864
-0.00125503
-0.005154
-0.0077181
-0.00204244
-0.000374915
-0.00173664
-0.00156339
-0.000245716
0.000343091
-0.00347059
-0.00991036
-0.00301731
-0.006646
-0.000957228
-0.00275391
-0.00313775
-0.0050735
-0.00446584
-0.00292188
-0.00140321
-0.00161754
-0.0021367
-0.00172453
-0.00297637
-0.0042038
-0.00260374
-0.00134085
-0.00138316
-0.00315406
-0.00765053
-0.00175387
-0.00572676
-0.0101742
-0.00185575
-0.00291486
-0.0108321
0.000237985
-0.00509659
-0.000189889
-0.00741958
-6.66205e-05
-0.00170012
-0.000599278
-0.00535874
8.96399e-05
-0.000564565
-0.00548749
-0.00443609
-0.00986565
-0.00545238
-0.00662084
-0.00451925
-0.00709143
-0.00482263
-0.00482897
-0.00283621
-0.000453379
-0.00148743
-0.000180146
-0.00123556
0.000881429
-0.000702787
-0.00172877
0.000559949
0.000635514
0.000932805
0.00074842
0.000530665
-0.0002233
-0.000132393
-0.000656188
-0.00062493
-0.00162586
-0.000952619
-0.000133645
-0.000417608
-0.00020405
0.00189315
0.00163399
4.55892e-06
-0.0010821
0.00159269
-0.00159339
-0.000228771
0.00128458
0.000560812
-0.000293001
0.00135509
0.00042708
0.0016336
0.00160913
0.00016748
0.000471103
0.00029436
-0.000637665
-0.000426532
0.00406271
0.0013064
0.00157635
-0.00109306
0.00113268
0.000292273
-0.000395426
-0.00930307
-0.00789662
-0.00457433
-0.00186136
-0.00127688
-0.000128256
-0.00156973
-0.00116135
-0.00668155
-0.00258136
-0.0040863
-0.00762472
-0.000387371
0.00116371
-0.00532979
-7.45815e-05
0.000336214
0.00393234
0.000475674
0.000699575
-0.00273908
-0.00124373
0.00125491
0.000810903
0.000358938
0.00125322
0.00285439
-0.00143119
0.000150687
0.000387124
0.00016332
0.000484741
0
0
0.000295592
-0.00200559
-6.63697e-05
-4.08794e-07
-0.000221292
0.00123949
-0.00137813
0.000564514
-0.000390095
0.00181056
0.000394701
0.000788901
0.00135457
0.000659997
0.000573815
0.00257703
0.000299867
0.00111159
-0.000144558
0.000551711
-0.00150362
0.000260677
0.00338949
0.00192703
0.00696344
-0.000524525
-0.000426623
-0.00153237
0
0.000586484
0.00366199
-0.000109871
-0.00524674
-0.00401731
-0.000724344
-0.00384931
0.000116209
-0.00239438
-0.000138813
0.00129049
0.000342984
0.00121506
0.000545508
9.44271e-05
0.000939181
0.00316891
0.00169879
0.00202691
0.00207377
-0.00190773
0.00146541
-0.00195021
0.000345981
0.00020366
-0.000313953
-0.000464899
-0.000200923
0.00172086
-2.01676e-05
0.0047034
0.00363944
-0.00335716
-0.00588401
-0.00171616
-0.00822473
-0.00267539
-0.00201006
-0.00112896
-0.0057889
0.00180175
1.73047e-05
0
-0.0029737
-0.00154425
0.000283979
0.0013955
0.000271182
-0.000168132
-0.000336157
-0.000642471
-0.000322304
-0.000407252
-0.000798922
-0.002529
-0.000178676
-0.000154359
0.000772808
0.000604913
0
0
6.57311e-05
-0.000149953
0.000347761
0.000645371
0.000775625
2.56385e-06
0.000140034
0.000265825
-0.000127878
-0.00142597
-0.000787009
0.0011658
0.00161796
0.000473051
-0.00184247
-0.00154105
-0.000706636
-0.000275248
0
-0.000345371
-0.00235285
-0.000529493
-0.00130962
0.00113198
0.000155333
0
-0.000238556
0.000190822
0.000258485
-0.000436305
0.000675957
0.00145393
0.000674089
-7.34178e-05

## Sheet: PhiR_CombinedChanges_Brain_S454
0
0
0
0
0
0
0
0
0
0
0
0
0
0
0
0
0
0
0
0
0
0
0
0
0
0
0
0
0
0
0
0
0
0
0
0
0
0
0
0
0
0
0
0
0
0
0
0
0
0
0
0
0
0
0
0
0
0
0
0
0
0
0
0
0
0
0
0
0
0
0
0
0
0
0
0
0
0
0
0
0
0
0
0
0
0
0
0
0
0
0
0
0
0
0
0
0
0
0
0
0
0
0
0
0
0
0
0
0
0
0
0
0
0
0
0
0
0
0
0
0
0
0
0
0
0
0
0
0
0
0
0
0
0
0
0
0
0
0
0
0
0
0
0
0
0
0
0.139494
-0.034035
0
0
0
0
0
0
0
0
0
0
-0.069278
0
-0.137734
0
0
0
0
0
-0.149807
0
0
0
0
0
0
0
0
0
0
0
0
0.0772336
0
0
0
0
0
0
0.0270299
0
0
0
-0.0665804
0
0
-0.0607151
-0.0669956
0
0
0
0
0
0
0
0
0
0
0
0
0
0
0
0
0
0
0
0
0
0
0
0
0
0
0
0
0
0
0
0
0
0
0
0
0
0
0
0
0
0
0
0
0
0
0
0
0
0
0
0
0
0
0
0
0
0
0
0
0
0
0
0
0
0
0
0
0
0
0
0
0
0
0
0
0
0
0
0
0
0
0
0
0
0
0
0
0
0
0
0
0
0
0
0
0
0
0
0
0
0
0
0
0
0
0
0
0
0
0
0
0
0
0
0
0
0.0366383
0
0
0
0
0
0
0
0
0
0
0
0
0
0
0
0
0
0
0
0
0
0
0
0
0
0
0
0
0
0
0.0338341
0.0568879
0
0
0
0
0
0
0
0
0.0253334
0
0
0
0
0
0.0918069
0
0
-0.0304961
0
0
0
0
0
0
0
0
0
0
0
0
0
0
0
-0.0329606
0
-0.0943154
0
0.0230538
0
0
0.0360223
0.100345
-0.0294182
0.0548024
0
0
0
0
-0.0418986
0
0
0
0
0
0
0
0
0
0
0
0
0
0
0
0
0
0
0
0
0
0
0
0
0
0
0
0
0
0
0
0
0
0
0
0
0
0
0
0
0
0
0
0
0
0
0
0
0
0
0
0
0
0
0
0
0
0
0

## Sheet: OriginPhi_combined_Intens9_S454
0
0
0
0
0
0
0
0
0
0
0
0
0
0
0
0
0
0
0
0
0
0
0
0
0
0
0
0
0
0
0
0
0
0
0
0
0
0
0
0
0
0
0
0
0
0
0
0
0
0
0
0
0
0
0
0
0
0
0
0
0
0
0
0
0
0
0
0
0
0
0
0
0
0
0
0
0
0
0
0
0
0
0
0
0
0
0
0
0
0
0
0
0
0
0
0
0
0
0
0
0
0
0
0
0
0.0307102
0
0
0
0
0
0
0
0
0
0
0
0
0
0
0
0
0
0
0
0
0
0
0
0
0
0
0
0
0
0
0
0
0
0
0
0
0
0
0
0
0
0
0
0
0
0
0
0
0
0
0
0
0
0
0
0
0
0
0
0
0
0
0
0
0
0
0
0
0
0
0
0
0
0
0
0
0
0
0
0
0
0
0
0
0
0
0
0
0
0
0
0
0
0
0
0
0
0
0
0
0
0
0
0
0
0
0
0
0
0
0
0
0
0
0
0
0
0
0
0
0
0
0
0
0
0
0
0
0
0
0
0
0
0
0
0
0
0
0
0
0
0
0
0
0
0
0
0
0
0
0
0
0
0
0
0
0
0
0
0
0
0
0
0
0
0
0
0
0
0
0
0
0
0
0
0
0
0
0
0
0
0
0
0
0
0
0
0
0
0
0
0
0
0
0
0
0
0
0
0
0
0
0
0
0
0
0
0
0
0
0
0
0
0
0
0
0
0
0
0
0
0
0
0
0
0
0
0.0307102
0
0
0
0
0
0
0
0
0
0
0
0
0
0
0
0
0
0
0
0
0
0
0
0
0
0
0
0
0
0
0
0
0
0
0
0
0
0
0
0
0
0
0
0
0
0
0
0
0
0
0
0
0
0
0
0
0
0
0
0
0
0
0
0
0
0
0
0
0
0
0
0
0
0
0
0
0
0
0
0
0
0
0
0
0
0
0
0
0
0
0
0
0
0
0
0
0
0
0
0
0
0
0
0
0
0
0
0
0
0
0
0
0
0
0
0
0
0
0
0

## Sheet: PhiR_combined_Intensity9_S232
0
0
0
0
0
0
0
0
0
0
0
0
0
0
0
0
0
0
0
0
0
0
0
0
0
0
0
0
0
0
0
0
0
0
0
0
0
0
0
0
0
0
0
0
0
0
0
0
0
0
0
0
0
0
0
0
0
0
0
0
0
0
0
0
0
0
0
0
0
0
0
0
0
0
0
0
0
0
0
0
0
0
0
0
0
-0.141666
0
0
0
0
0
0
0
0
0
0
-0.208691
0
0
0
0
0
0
0
0
0
0
0
0
0
0
0
0
0
0
0
0
0
0
0
0
0
0
0
0
0
0
0
0
0
0
0
0
0
0
0
0
0
0
0
0
0
0
0
0
0
0
0
0
0
0
0
0
0
0
0
0
0
0
0
0
0
0
0
0
0
0
0
0
0
0
0.080787
0
0
0
0
0
0
0
0
0
0
0
0
0
0
0
0
0
0
0
0
0
-0.0507494
-0.0471381
0
0
0
-0.11165
0
0
0
0
0
0
0
0
0
0
0
0
0
0
0
0
0
0
0
0
0
0
0
0
0
0
0
0
0
0
0
0
0

## Sheet: PhiR_combined_Intensity12_S454
0
0
0
0
0
0
0
0
0
0
0
0
0
0
0
0
0
0
0
0
0
0
0
0
0
0
0
0
0
0
0
0
0
0
0
0
0
0
0
0
0
0
0
0
0
0
0
0
0
0
0
0
0
0
0
0
0
0
0
0
0
0
0
0
0
0
0
0
0
0
0
0
0
0
0
0
0
0
0
0
0
0
0
0
0
0
0
0
0
0
0
0
0
0
0
0
0
0
0
0
0
0
0
0
0
0
0
0
0
0
0
0
0
0
0
0
0
0
0
0
0
0
0
0
0
0
0
0
0
0
0
0
0
0
0
0
0
0
0
0
0
0
0
0
0
0
0
0.0497496
0
0
0
0
0
0
0
0
0
0
0
-0.0473573
0
-0.108315
0
0
0
0
0
-0.0890923
0
0
0
0
0
0
0
0
0
0
0
0
0.0772336
0
0
0
0
0
0
0
0
0
0
-0.0665804
0
0
0
0
0
0
0
0
0
0
0
0
0
0
0
0
0
0
0
0
0
0
0
0
0
0
0
0
0
0
0
0
0
0
0
0
0
0
0
0
0
0
0
0
0
0
0
0
0
0
0
0
0
0
0
0
0
0
0
0
0
0
0
0
0
0
0
0
0
0
0
0
0
0
0
0
0
0
0
0
0
0
0
0
0
0
0
0
0
0
0
0
0
0
0
0
0
0
0
0
0
0
0
0
0
0
0
0
0
0
0
0
0
0
0
0
0
0
0
0
0
0
0
0
0
0
0
0
0
0
0
0
0
0
0
0
0
0
0
0
0
0
0
0
0
0
0
0
0
0
0
0
0.0338341
0.0338341
0
0
0
0
0
0
0
0
0
0
0
0
0
0
0.0918069
0
0
0
0
0
0
0
0
0
0
0
0
0
0
0
0
0
0
0
0
-0.0418986
0
0
0
0
0.0360223
0.100345
0
0
0
0
0
0
-0.0418986
0
0
0
0
0
0
0
0
0
0
0
0
0
0
0
0
0
0
0
0
0
0
0
0
0
0
0
0
0
0
0
0
0
0
0
0
0
0
0
0
0
0
0
0
0
0
0
0
0
0
0
0
0
0
0
0
0
0
0

## Sheet: PhiR_combined_Extent9_S454
0
0
0
0
0
0
0
0
0
0
0
0
0
0
0
0
0
0
0
0
0
0
0
0
0
0
0
0
0
0
0
0
0
0
0
0
0
0
0
0
0
0
0
0
0
0
0
0
0
0
0
0
0
0
0
0
0
0
0
0
0
0
0
0
0
0
0
0
0
0
0
0
0
0
0
0
0
0
0
0
0
0
0
0
0
0
0
0
0
0
0
0
0
0
0
0
0
0
0
0
0
0
0
0
0
0
0
0
0
0
0
0
0
0
0
0
0
0
0
0
0
0
0
0
0
0
0
0
0
0
0
0
0
0
0
0
0
0
0
0
0
0
0
0
0
0
0
0.139494
0
0
0
0
0
0
0
0
0
0
0
-0.069278
0
-0.137734
0
0
0
0
0
-0.149807
0
0
0
0
0
0
0
0
0
0
0
0
0.0772336
0
0
0
0
0
0
0.0270299
0
0
0
-0.0665804
0
0
-0.0607151
0
0
0
0
0
0
0
0
0
0
0
0
0
0
0
0
0
0
0
0
0
0
0
0
0
0
0
0
0
0
0
0
0
0
0
0
0
0
0
0
0
0
0
0
0
0
0
0
0
0
0
0
0
0
0
0
0
0
0
0
0
0
0
0
0
0
0
0
0
0
0
0
0
0
0
0
0
0
0
0
0
0
0
0
0
0
0
0
0
0
0
0
0
0
0
0
0
0
0
0
0
0
0
0
0
0
0
0
0
0
0
0
0
0
0
0
0
0
0.0366383
0
0
0
0
0
0
0
0
0
0
0
0
0
0
0
0
0
0
0
0
0
0
0
0
0
0
0
0
0
0
0
0
0
0
0
0
0
0
0
0
0.0253334
0
0
0
0
0
0.0918069
0
0
-0.0304961
0
0
0
0
0
0
0
0
0
0
0
0
0
0
0
0
0
-0.0943154
0
0
0
0
0.0360223
0.100345
-0.0294182
0.0548024
0
0
0
0
-0.0418986
0
0
0
0
0
0
0
0
0
0
0
0
0
0
0
0
0
0
0
0
0
0
0
0
0
0
0
0
0
0
0
0
0
0
0
0
0
0
0
0
0
0
0
0
0
0
0
0
0
0
0
0
0
0
0
0
0
0
0
